# Supplementary material for: HLAB: learning the BiLSTM features from the ProtBert-encoded proteins for the class I HLA-peptide binding prediction
Source: PubMed Central journal article supplement — Brief Bioinform. 2022 May 5;23(5):bbac173. doi: 10.1093/bib/bbac173 (PMC9487590; doi:10.1093/bib/bbac173), 2022-05-05
Supplement: hlab-supp-r1f_bbac173.pdf [file hlab-supp-r1f_bbac173.pdf]

# **HLAB: learning the BiLSTM features from the ProtBert-encoded proteins for the class I HLA binding peptide prediction**

Yaqi Zhang<sup>1</sup>, Gancheng Zhu<sup>1</sup>, Kewei Li<sup>1</sup>, Fei Li<sup>1</sup>, Lan Huang<sup>1</sup>, Meiyu Duan<sup>1,#</sup>, Fengfeng Zhou<sup>1,#</sup>.

<sup>1</sup> College of Computer Science and Technology, and Key Laboratory of Symbolic Computation and Knowledge Engineering of Ministry of Education, Jilin University, Changchun, Jilin 130012, P.R. China.

# Correspondence to Fengfeng Zhou: FengfengZhou@gmail.com . Phone: +86-431-8516-6024. Fax: +86-431-8516-6024. Correspondence may also be addressed to Meiyu Duan, dmy235813@163.com.

**Running title:** ProtBert-BiLSTM features to predict HLA-I peptides

## Detailed summary of the dataset

The peptide sequences binding with the class I HLA alleles were retrieved from the study Anthem [1]. These HLA-I binding peptides were collected from the three data resources. Firstly, the known HLA-I binders from the four databases IEDB [2], EPIMHC [3], MHCBN [4] and SYFPEITHI [5] were curated as the positive samples. Secondly, allotype-specific HLA-I ligands detected by the mass spectrometry technology in the literature were curated to be the positive samples. Thirdly, HLA-I binding peptides used as the training positives from the other HLA-I binding prediction tools were also included as the positive samples. Non-specific HLA-I alleles and their corresponding peptides were removed. Only the polypeptides with the lengths between 8-14 amino acids and an HLA-I allele with at least 50 binding peptides were kept for further analysis.

This study used the same method of generative the negative samples as in Anthem [1]. In summary, the negative samples were defined as the randomly retrieved sequence segments from the source proteins of the HLA-I immunopeptidomes in the database IEDB [2] and satisfying the following conditions. (i) The negative samples matched the lengths of the positive peptides binding to a specific HLA-I allele. (ii) For each HLA-I allele, we constructed almost the same number of negative samples to that of the positives, as similar in [1]. (iii) No identical negative samples were kept in the dataset of the HLA-I allele subtype.

So we have a binary classification dataset for each peptide length (between 8-14 amino acids) of each HLA-I allele, as shown in the Supplementary Table S1. Each dataset was randomly split into the training, validating and testing subsets by the ratio 3:1:1. We have 539022, 179673 and 172526 HLA-I binding peptides in the training, validating and testing datasets, respectively. The summarized numbers of HLA-I binding peptides for each peptide length were summarized in the Table 1.

This study used the pseudo sequence encoding strategy from the NetMHCPan [6], which transformed a HLA sequence into a pseudo-sequence containing 34 amino acid residues. The detailed encoding strategy may be found in the original study, and the file consisting of mapping relations was released in the Python implementation of HLAB.

## Supplementary Table S1

A statistical summary of the peptide binders used for both the training, validating and testing datasets.

| Length | HLA         | Number of training peptides | Number of validating peptides | Number of testing peptides |
|--------|-------------|-----------------------------|-------------------------------|----------------------------|
| 8      | HLA-A*01:01 | 410                         | 125                           | 135                        |
|        | HLA-A*02:01 | 952                         | 303                           | 315                        |
|        | HLA-A*03:01 | 345                         | 110                           | 115                        |

|             |      |     |     |
|-------------|------|-----|-----|
| HLA-A*11:01 | 112  | 25  | 35  |
| HLA-A*24:02 | 277  | 74  | 89  |
| HLA-A*29:02 | 239  | 80  | 81  |
| HLA-B*07:02 | 1085 | 362 | 363 |
| HLA-B*08:01 | 1417 | 432 | 463 |
| HLA-B*13:02 | 92   | 21  | 29  |
| HLA-B*14:02 | 646  | 197 | 213 |
| HLA-B*15:01 | 674  | 217 | 225 |
| HLA-B*18:01 | 608  | 225 | 211 |
| HLA-B*18:03 | 122  | 47  | 43  |
| HLA-B*27:05 | 965  | 284 | 313 |
| HLA-B*27:09 | 117  | 36  | 41  |
| HLA-B*35:01 | 282  | 87  | 93  |
| HLA-B*37:01 | 703  | 266 | 245 |
| HLA-B*39:01 | 166  | 43  | 55  |
| HLA-B*39:24 | 155  | 44  | 51  |
| HLA-B*40:01 | 130  | 33  | 43  |
| HLA-B*40:02 | 1797 | 594 | 599 |
| HLA-B*44:02 | 183  | 50  | 59  |
| HLA-B*44:03 | 168  | 55  | 57  |
| HLA-B*46:01 | 113  | 44  | 41  |
| HLA-B*49:01 | 782  | 239 | 257 |
| HLA-B*51:01 | 1311 | 458 | 443 |
| HLA-B*51:08 | 97   | 40  | 35  |
| HLA-B*52:01 | 465  | 144 | 153 |
| HLA-B*54:01 | 148  | 51  | 51  |
| HLA-B*57:01 | 482  | 161 | 163 |
| HLA-B*57:03 | 336  | 117 | 115 |
| HLA-B*58:01 | 468  | 143 | 155 |
| HLA-C*01:02 | 329  | 104 | 109 |
| HLA-C*02:02 | 152  | 39  | 49  |
| HLA-C*03:03 | 216  | 55  | 69  |
| HLA-C*03:04 | 346  | 107 | 115 |
| HLA-C*04:01 | 937  | 320 | 317 |
| HLA-C*05:01 | 867  | 282 | 289 |
| HLA-C*06:02 | 200  | 73  | 71  |
| HLA-C*07:01 | 267  | 88  | 91  |
| HLA-C*07:02 | 319  | 98  | 107 |
| HLA-C*07:04 | 122  | 31  | 39  |
| HLA-C*08:02 | 951  | 346 | 325 |
| HLA-C*12:03 | 185  | 50  | 61  |
| HLA-C*14:02 | 591  | 186 | 195 |
| HLA-C*15:02 | 225  | 80  | 79  |
| HLA-C*16:01 | 950  | 289 | 311 |

|   |             |       |      |      |
|---|-------------|-------|------|------|
|   | HLA-C*17:01 | 139   | 54   | 51   |
|   | HLA-A*01:01 | 6314  | 2033 | 2089 |
|   | HLA-A*02:01 | 23435 | 7912 | 7783 |
|   | HLA-A*02:02 | 1806  | 611  | 605  |
|   | HLA-A*02:03 | 3883  | 1308 | 1299 |
|   | HLA-A*02:04 | 1656  | 549  | 553  |
|   | HLA-A*02:05 | 2724  | 939  | 917  |
|   | HLA-A*02:06 | 4761  | 1626 | 1599 |
|   | HLA-A*02:07 | 2897  | 996  | 975  |
|   | HLA-A*02:11 | 492   | 165  | 165  |
|   | HLA-A*02:12 | 399   | 154  | 141  |
|   | HLA-A*02:16 | 241   | 64   | 77   |
|   | HLA-A*02:17 | 172   | 57   | 59   |
|   | HLA-A*02:19 | 296   | 101  | 101  |
|   | HLA-A*02:20 | 1219  | 386  | 403  |
|   | HLA-A*02:50 | 106   | 37   | 37   |
|   | HLA-A*03:01 | 11043 | 3638 | 3673 |
|   | HLA-A*11:01 | 8098  | 2721 | 2707 |
|   | HLA-A*23:01 | 3681  | 1186 | 1219 |
|   | HLA-A*24:02 | 8120  | 2639 | 2669 |
|   | HLA-A*24:03 | 466   | 151  | 157  |
|   | HLA-A*24:06 | 147   | 38   | 47   |
| 9 | HLA-A*24:13 | 174   | 63   | 61   |
|   | HLA-A*25:01 | 144   | 49   | 51   |
|   | HLA-A*26:01 | 2329  | 780  | 779  |
|   | HLA-A*26:02 | 286   | 91   | 97   |
|   | HLA-A*26:03 | 95    | 38   | 35   |
|   | HLA-A*29:02 | 6293  | 1908 | 2053 |
|   | HLA-A*30:01 | 1860  | 601  | 617  |
|   | HLA-A*30:02 | 857   | 270  | 237  |
|   | HLA-A*31:01 | 4858  | 1637 | 1625 |
|   | HLA-A*32:01 | 4141  | 1342 | 1373 |
|   | HLA-A*32:07 | 105   | 36   | 37   |
|   | HLA-A*32:15 | 90    | 27   | 31   |
|   | HLA-A*33:01 | 817   | 300  | 281  |
|   | HLA-A*66:01 | 116   | 33   | 39   |
|   | HLA-A*68:01 | 7719  | 2532 | 2565 |
|   | HLA-A*68:02 | 5066  | 1727 | 1699 |
|   | HLA-A*68:23 | 100   | 29   | 35   |
|   | HLA-A*69:01 | 1256  | 465  | 433  |
|   | HLA-A*80:01 | 209   | 76   | 73   |
|   | HLA-B*07:02 | 12272 | 4139 | 4105 |
|   | HLA-B*08:01 | 6372  | 2071 | 2113 |
|   | HLA-B*13:02 | 3626  | 1199 | 1207 |

|             |       |      |      |
|-------------|-------|------|------|
| HLA-B*14:01 | 110   | 43   | 39   |
| HLA-B*14:02 | 3952  | 1287 | 1311 |
| HLA-B*15:01 | 14238 | 4847 | 4773 |
| HLA-B*15:02 | 318   | 105  | 107  |
| HLA-B*15:03 | 483   | 172  | 165  |
| HLA-B*15:09 | 121   | 44   | 43   |
| HLA-B*15:11 | 1098  | 379  | 371  |
| HLA-B*15:17 | 597   | 190  | 199  |
| HLA-B*15:18 | 1317  | 406  | 433  |
| HLA-B*15:42 | 425   | 142  | 143  |
| HLA-B*18:01 | 2493  | 830  | 833  |
| HLA-B*18:03 | 197   | 60   | 65   |
| HLA-B*27:01 | 2289  | 736  | 757  |
| HLA-B*27:02 | 1567  | 484  | 515  |
| HLA-B*27:03 | 610   | 199  | 205  |
| HLA-B*27:04 | 2450  | 857  | 829  |
| HLA-B*27:05 | 24018 | 8151 | 4251 |
| HLA-B*27:06 | 978   | 315  | 325  |
| HLA-B*27:07 | 1322  | 439  | 443  |
| HLA-B*27:08 | 1113  | 388  | 377  |
| HLA-B*27:09 | 3658  | 1217 | 1221 |
| HLA-B*27:20 | 111   | 36   | 39   |
| HLA-B*35:01 | 9852  | 3197 | 3265 |
| HLA-B*35:03 | 4424  | 1437 | 1467 |
| HLA-B*35:08 | 1141  | 410  | 389  |
| HLA-B*37:01 | 4145  | 1358 | 1377 |
| HLA-B*38:01 | 4645  | 1594 | 1561 |
| HLA-B*39:01 | 5341  | 1724 | 1767 |
| HLA-B*39:06 | 1869  | 658  | 633  |
| HLA-B*39:24 | 586   | 191  | 195  |
| HLA-B*40:01 | 4250  | 1487 | 1437 |
| HLA-B*40:02 | 6165  | 2086 | 2065 |
| HLA-B*41:01 | 647   | 220  | 219  |
| HLA-B*44:02 | 6613  | 2176 | 2199 |
| HLA-B*44:03 | 5350  | 1781 | 1785 |
| HLA-B*45:01 | 2564  | 863  | 859  |
| HLA-B*45:06 | 426   | 135  | 143  |
| HLA-B*46:01 | 1771  | 616  | 599  |
| HLA-B*48:01 | 146   | 43   | 49   |
| HLA-B*49:01 | 4446  | 1443 | 1473 |
| HLA-B*50:01 | 1870  | 643  | 631  |
| HLA-B*51:01 | 4067  | 1382 | 1365 |
| HLA-B*51:08 | 571   | 206  | 197  |
| HLA-B*52:01 | 156   | 59   | 55   |

|             |      |      |      |
|-------------|------|------|------|
| HLA-B*53:01 | 635  | 206  | 197  |
| HLA-B*54:01 | 1033 | 358  | 349  |
| HLA-B*56:01 | 553  | 184  | 187  |
| HLA-B*57:01 | 7107 | 2340 | 2363 |
| HLA-B*57:03 | 3244 | 1091 | 1085 |
| HLA-B*58:01 | 4109 | 1306 | 1329 |
| HLA-B*73:01 | 639  | 178  | 207  |
| HLA-B*83:01 | 389  | 126  | 131  |
| HLA-C*01:02 | 1550 | 543  | 525  |
| HLA-C*02:02 | 6187 | 2070 | 2065 |
| HLA-C*03:03 | 5633 | 1946 | 1897 |
| HLA-C*03:04 | 5025 | 1724 | 1689 |
| HLA-C*04:01 | 9692 | 3271 | 3243 |
| HLA-C*05:01 | 4350 | 1507 | 1467 |
| HLA-C*06:02 | 6678 | 2165 | 2213 |
| HLA-C*07:01 | 4256 | 1431 | 1423 |
| HLA-C*07:02 | 3695 | 1276 | 1245 |
| HLA-C*07:04 | 3288 | 1071 | 1091 |
| HLA-C*08:02 | 5886 | 1971 | 1965 |
| HLA-C*12:03 | 2246 | 755  | 751  |
| HLA-C*14:02 | 2213 | 712  | 733  |
| HLA-C*15:02 | 2153 | 730  | 723  |
| HLA-C*16:01 | 3936 | 1283 | 1307 |
| HLA-C*17:01 | 500  | 171  | 169  |
| HLA-A*01:01 | 2714 | 861  | 895  |
| HLA-A*02:01 | 6364 | 2105 | 2119 |
| HLA-A*02:02 | 1181 | 412  | 401  |
| HLA-A*02:03 | 1873 | 682  | 641  |
| HLA-A*02:04 | 184  | 57   | 63   |
| HLA-A*02:05 | 448  | 151  | 151  |
| HLA-A*02:06 | 1273 | 426  | 427  |
| HLA-A*02:07 | 532  | 197  | 185  |
| HLA-A*02:17 | 184  | 55   | 61   |
| HLA-A*03:01 | 2974 | 995  | 993  |
| HLA-A*11:01 | 3491 | 1214 | 1177 |
| HLA-A*23:01 | 659  | 286  | 237  |
| HLA-A*24:02 | 2009 | 736  | 689  |
| HLA-A*24:06 | 120  | 33   | 41   |
| HLA-A*26:01 | 378  | 143  | 131  |
| HLA-A*29:02 | 1494 | 463  | 491  |
| HLA-A*30:01 | 225  | 88   | 79   |
| HLA-A*30:02 | 416  | 149  | 143  |
| HLA-A*31:01 | 1416 | 457  | 471  |
| HLA-A*32:01 | 687  | 230  | 231  |

|             |       |      |      |
|-------------|-------|------|------|
| HLA-A*33:01 | 782   | 261  | 263  |
| HLA-A*68:01 | 2142  | 733  | 721  |
| HLA-A*68:02 | 1791  | 628  | 607  |
| HLA-A*69:01 | 154   | 41   | 51   |
| HLA-B*07:02 | 3222  | 1061 | 1073 |
| HLA-B*08:01 | 421   | 128  | 139  |
| HLA-B*13:02 | 117   | 48   | 43   |
| HLA-B*14:02 | 236   | 73   | 79   |
| HLA-B*15:01 | 3493  | 1102 | 1151 |
| HLA-B*18:01 | 252   | 85   | 85   |
| HLA-B*27:01 | 1129  | 374  | 377  |
| HLA-B*27:02 | 1088  | 353  | 363  |
| HLA-B*27:03 | 292   | 77   | 95   |
| HLA-B*27:04 | 354   | 119  | 121  |
| HLA-B*27:05 | 12050 | 3973 | 1767 |
| HLA-B*27:06 | 301   | 96   | 101  |
| HLA-B*27:07 | 624   | 205  | 209  |
| HLA-B*27:08 | 627   | 214  | 213  |
| HLA-B*27:09 | 1330  | 429  | 441  |
| HLA-B*35:01 | 1672  | 559  | 559  |
| HLA-B*35:03 | 296   | 95   | 99   |
| HLA-B*35:08 | 269   | 100  | 93   |
| HLA-B*37:01 | 470   | 171  | 163  |
| HLA-B*39:01 | 305   | 98   | 103  |
| HLA-B*40:01 | 1375  | 426  | 453  |
| HLA-B*40:02 | 2179  | 720  | 727  |
| HLA-B*41:01 | 94    | 31   | 33   |
| HLA-B*44:02 | 2426  | 867  | 825  |
| HLA-B*44:03 | 2197  | 713  | 729  |
| HLA-B*44:27 | 76    | 33   | 29   |
| HLA-B*45:01 | 666   | 197  | 217  |
| HLA-B*46:01 | 444   | 161  | 153  |
| HLA-B*49:01 | 637   | 212  | 215  |
| HLA-B*50:01 | 243   | 100  | 87   |
| HLA-B*51:01 | 989   | 316  | 329  |
| HLA-B*53:01 | 341   | 130  | 119  |
| HLA-B*54:01 | 391   | 130  | 133  |
| HLA-B*56:01 | 209   | 76   | 73   |
| HLA-B*57:01 | 3680  | 1235 | 1231 |
| HLA-B*57:03 | 1289  | 448  | 435  |
| HLA-B*58:01 | 1180  | 399  | 397  |
| HLA-C*01:02 | 478   | 171  | 165  |
| HLA-C*02:02 | 732   | 251  | 247  |
| HLA-C*03:03 | 421   | 144  | 143  |

|             |      |      |      |
|-------------|------|------|------|
| HLA-C*03:04 | 468  | 181  | 165  |
| HLA-C*04:01 | 1373 | 474  | 463  |
| HLA-C*05:01 | 686  | 251  | 237  |
| HLA-C*06:02 | 562  | 215  | 195  |
| HLA-C*07:01 | 479  | 156  | 161  |
| HLA-C*07:02 | 322  | 111  | 111  |
| HLA-C*07:04 | 180  | 73   | 65   |
| HLA-C*08:02 | 686  | 207  | 225  |
| HLA-C*14:02 | 353  | 154  | 129  |
| HLA-C*16:01 | 270  | 97   | 93   |
| HLA-A*01:01 | 1378 | 467  | 463  |
| HLA-A*02:01 | 3057 | 952  | 1005 |
| HLA-A*02:03 | 145  | 58   | 53   |
| HLA-A*02:04 | 173  | 56   | 59   |
| HLA-A*02:05 | 102  | 35   | 35   |
| HLA-A*02:07 | 451  | 150  | 153  |
| HLA-A*03:01 | 1002 | 315  | 331  |
| HLA-A*11:01 | 1392 | 469  | 467  |
| HLA-A*23:01 | 161  | 46   | 53   |
| HLA-A*24:02 | 1085 | 396  | 373  |
| HLA-A*24:06 | 104  | 45   | 39   |
| HLA-A*29:02 | 549  | 202  | 189  |
| HLA-A*31:01 | 382  | 143  | 133  |
| HLA-A*32:01 | 290  | 105  | 101  |
| HLA-A*68:01 | 313  | 114  | 109  |
| HLA-A*68:02 | 412  | 143  | 141  |
| HLA-B*07:02 | 1668 | 501  | 545  |
| HLA-B*08:01 | 197  | 66   | 67   |
| HLA-B*15:01 | 1346 | 439  | 447  |
| HLA-B*27:01 | 679  | 202  | 221  |
| HLA-B*27:02 | 704  | 227  | 235  |
| HLA-B*27:03 | 219  | 70   | 75   |
| HLA-B*27:04 | 155  | 52   | 53   |
| HLA-B*27:05 | 8210 | 2639 | 1159 |
| HLA-B*27:06 | 152  | 49   | 51   |
| HLA-B*27:07 | 353  | 128  | 121  |
| HLA-B*27:08 | 441  | 148  | 149  |
| HLA-B*27:09 | 834  | 293  | 283  |
| HLA-B*35:01 | 760  | 273  | 259  |
| HLA-B*35:03 | 173  | 58   | 59   |
| HLA-B*35:08 | 151  | 62   | 55   |
| HLA-B*37:01 | 87   | 24   | 29   |
| HLA-B*39:01 | 203  | 70   | 69   |
| HLA-B*40:01 | 670  | 207  | 221  |



|    |             |      |      |      |
|----|-------------|------|------|------|
|    | HLA-B*40:02 | 877  | 280  | 291  |
|    | HLA-B*44:02 | 1106 | 387  | 375  |
|    | HLA-B*44:03 | 888  | 285  | 295  |
|    | HLA-B*45:01 | 181  | 68   | 63   |
|    | HLA-B*46:01 | 107  | 32   | 37   |
|    | HLA-B*49:01 | 140  | 39   | 47   |
|    | HLA-B*51:01 | 546  | 169  | 181  |
|    | HLA-B*54:01 | 168  | 67   | 61   |
|    | HLA-B*56:01 | 98   | 31   | 33   |
|    | HLA-B*57:01 | 3404 | 1199 | 1153 |
|    | HLA-B*57:03 | 1001 | 334  | 335  |
|    | HLA-B*58:01 | 624  | 201  | 207  |
|    | HLA-C*01:02 | 272  | 79   | 89   |
|    | HLA-C*02:02 | 154  | 49   | 53   |
|    | HLA-C*03:03 | 119  | 34   | 41   |
|    | HLA-C*03:04 | 147  | 52   | 21   |
|    | HLA-C*04:01 | 384  | 127  | 129  |
|    | HLA-C*05:01 | 380  | 93   | 121  |
|    | HLA-C*06:02 | 211  | 68   | 71   |
|    | HLA-C*07:01 | 239  | 84   | 83   |
|    | HLA-C*07:02 | 121  | 38   | 41   |
|    | HLA-C*08:02 | 172  | 61   | 61   |
|    | HLA-C*16:01 | 86   | 21   | 29   |
|    | HLA-A*01:01 | 1018 | 359  | 347  |
|    | HLA-A*02:01 | 1368 | 457  | 457  |
|    | HLA-A*03:01 | 502  | 189  | 175  |
|    | HLA-A*11:01 | 351  | 138  | 125  |
|    | HLA-A*24:02 | 370  | 121  | 125  |
|    | HLA-A*29:02 | 190  | 67   | 67   |
|    | HLA-A*31:01 | 143  | 52   | 51   |
|    | HLA-A*68:01 | 102  | 23   | 33   |
|    | HLA-A*68:02 | 234  | 69   | 77   |
|    | HLA-B*07:02 | 661  | 212  | 219  |
| 12 | HLA-B*08:01 | 218  | 73   | 75   |
|    | HLA-B*15:01 | 469  | 144  | 155  |
|    | HLA-B*27:01 | 220  | 83   | 77   |
|    | HLA-B*27:02 | 353  | 114  | 119  |
|    | HLA-B*27:03 | 93   | 26   | 31   |
|    | HLA-B*27:05 | 4464 | 1517 | 1497 |
|    | HLA-B*27:07 | 141  | 46   | 49   |
|    | HLA-B*27:08 | 188  | 61   | 65   |
|    | HLA-B*27:09 | 361  | 122  | 123  |
|    | HLA-B*35:01 | 228  | 61   | 73   |
|    | HLA-B*40:01 | 183  | 62   | 63   |

|    |             |      |     |      |
|----|-------------|------|-----|------|
|    | HLA-B*40:02 | 249  | 78  | 83   |
|    | HLA-B*44:02 | 358  | 157 | 131  |
|    | HLA-B*44:03 | 249  | 88  | 87   |
|    | HLA-B*51:01 | 438  | 125 | 143  |
|    | HLA-B*57:01 | 1771 | 538 | 579  |
|    | HLA-B*57:03 | 223  | 66  | 73   |
|    | HLA-B*58:01 | 212  | 67  | 71   |
|    | HLA-C*01:02 | 231  | 92  | 83   |
|    | HLA-C*04:01 | 139  | 54  | 51   |
|    | HLA-C*05:01 | 106  | 47  | 41   |
|    | HLA-C*06:02 | 156  | 45  | 53   |
|    | HLA-C*07:01 | 209  | 78  | 73   |
|    | HLA-A*01:01 | 652  | 221 | 221  |
|    | HLA-A*02:01 | 556  | 205 | 191  |
|    | HLA-A*03:01 | 98   | 41  | 37   |
|    | HLA-A*11:01 | 112  | 29  | 37   |
|    | HLA-A*24:02 | 244  | 69  | 79   |
|    | HLA-A*29:02 | 219  | 78  | 77   |
|    | HLA-A*31:01 | 78   | 35  | 29   |
|    | HLA-A*68:02 | 136  | 43  | 47   |
|    | HLA-B*07:02 | 390  | 123 | 129  |
|    | HLA-B*15:01 | 297  | 104 | 103  |
|    | HLA-B*27:01 | 105  | 38  | 37   |
| 13 | HLA-B*27:02 | 155  | 60  | 55   |
|    | HLA-B*27:05 | 3055 | 986 | 1013 |
|    | HLA-B*27:08 | 88   | 33  | 31   |
|    | HLA-B*27:09 | 221  | 68  | 73   |
|    | HLA-B*35:01 | 96   | 37  | 35   |
|    | HLA-B*44:02 | 128  | 37  | 43   |
|    | HLA-B*51:01 | 117  | 36  | 41   |
|    | HLA-B*57:01 | 999  | 296 | 325  |
|    | HLA-B*57:03 | 114  | 39  | 41   |
|    | HLA-B*58:01 | 111  | 34  | 37   |
|    | HLA-C*04:01 | 135  | 40  | 45   |
|    | HLA-C*05:01 | 89   | 32  | 31   |
|    | HLA-C*06:02 | 178  | 61  | 61   |
|    | HLA-A*01:01 | 313  | 96  | 103  |
|    | HLA-A*02:01 | 291  | 116 | 103  |
|    | HLA-A*24:02 | 99   | 30  | 33   |
| 14 | HLA-A*68:02 | 104  | 37  | 37   |
|    | HLA-B*07:02 | 207  | 70  | 71   |
|    | HLA-B*15:01 | 179  | 74  | 65   |
|    | HLA-B*27:05 | 2283 | 752 | 761  |
|    | HLA-B*27:09 | 140  | 61  | 51   |

|             |     |     |     |
|-------------|-----|-----|-----|
| HLA-B*35:01 | 92  | 25  | 31  |
| HLA-B*57:01 | 536 | 175 | 179 |
| HLA-C*04:01 | 114 | 31  | 39  |
| HLA-C*05:01 | 94  | 33  | 33  |
| HLA-C*06:02 | 220 | 69  | 73  |

## Supplementary Table S2

Different binary classification tasks were optimized to have different values for the UMAP reduced dimensions (UMAP Dimension), and the percent of the top-ranked features (FS FNPercent).

| Length | HLA-I       | Classifier | Feature Selection | UMAP Dimension | FS FNPercent |
|--------|-------------|------------|-------------------|----------------|--------------|
| 8      | HLA-A*01:01 | LR         | SVM_RFE           | 16             | 0.55         |
|        |             | XGBoost    | RF                | 16             | 0.95         |
|        |             | Bagging    | RF                | 16             | 0.95         |
|        |             | SVM        | W-test            | 14             | 0.55         |
|        |             | KNN        | LR_RFE            | 12             | 0.55         |
|        |             | NB         | SVM_RFE           | 12             | 0.55         |
|        |             | Dtree      | T-test            | 15             | 0.75         |
|        | HLA-A*02:01 | NB         | T-test            | 6              | 0.75         |
|        |             | SVM        | W-test            | 18             | 0.95         |
|        |             | XGBoost    | LR_RFE            | 9              | 0.95         |
|        |             | KNN        | T-test            | 9              | 0.75         |
|        |             | LR         | W-test            | 15             | 0.95         |
|        |             | Bagging    | RF                | 8              | 0.95         |
|        |             | Dtree      | T-test            | 13             | 0.95         |
|        | HLA-A*03:01 | KNN        | SVM_RFE           | 13             | 0.55         |
|        |             | XGBoost    | T-test            | 10             | 0.95         |
|        |             | NB         | T-test            | 9              | 0.55         |
|        |             | LR         | T-test            | 9              | 0.95         |
|        |             | Bagging    | RF                | 10             | 0.95         |
|        |             | SVM        | T-test            | 6              | 0.95         |
|        |             | Dtree      | T-test            | 5              | 0.75         |
|        | HLA-A*11:01 | Dtree      | W-test            | 7              | 0.55         |
|        |             | Bagging    | LR_RFE            | 5              | 0.55         |
|        |             | XGBoost    | T-test            | 7              | 0.95         |
|        |             | NB         | T-test            | 5              | 0.95         |
|        |             | SVM        | T-test            | 5              | 0.75         |
|        |             | LR         | T-test            | 5              | 0.75         |

|             |         |         |    |      |
|-------------|---------|---------|----|------|
|             | KNN     | T-test  | 5  | 0.75 |
| HLA-A*24:02 | XGBoost | T-test  | 14 | 0.75 |
|             | LR      | T-test  | 10 | 0.55 |
|             | Dtree   | T-test  | 6  | 0.95 |
|             | SVM     | RF      | 16 | 0.75 |
|             | Bagging | T-test  | 6  | 0.55 |
|             | KNN     | RF      | 16 | 0.75 |
|             | NB      | T-test  | 5  | 0.95 |
| HLA-A*29:02 | NB      | RF      | 6  | 0.95 |
|             | LR      | RF      | 6  | 0.75 |
|             | XGBoost | SVM_RFE | 15 | 0.55 |
|             | Bagging | T-test  | 9  | 0.95 |
|             | KNN     | W-test  | 8  | 0.55 |
|             | Dtree   | T-test  | 9  | 0.95 |
|             | SVM     | RF      | 17 | 0.75 |
| HLA-B*07:02 | NB      | SVM_RFE | 12 | 0.75 |
|             | XGBoost | T-test  | 12 | 0.95 |
|             | Bagging | W-test  | 11 | 0.95 |
|             | KNN     | T-test  | 12 | 0.55 |
|             | LR      | RF      | 13 | 0.75 |
|             | Dtree   | T-test  | 13 | 0.55 |
|             | SVM     | T-test  | 13 | 0.75 |
| HLA-B*08:01 | XGBoost | RF      | 5  | 0.95 |
|             | LR      | RF      | 18 | 0.75 |
|             | SVM     | T-test  | 5  | 0.75 |
|             | Bagging | T-test  | 8  | 0.95 |
|             | NB      | T-test  | 8  | 0.95 |
|             | KNN     | T-test  | 5  | 0.75 |
|             | Dtree   | W-test  | 9  | 0.95 |
| HLA-B*13:02 | Dtree   | T-test  | 11 | 0.75 |
|             | Bagging | T-test  | 15 | 0.75 |
|             | SVM     | T-test  | 17 | 0.55 |
|             | LR      | T-test  | 17 | 0.55 |
|             | NB      | W-test  | 12 | 0.55 |
|             | KNN     | RF      | 17 | 0.75 |
|             | XGBoost | SVM_RFE | 15 | 0.55 |
| HLA-B*14:02 | Bagging | T-test  | 5  | 0.95 |
|             | XGBoost | T-test  | 15 | 0.95 |
|             | Dtree   | W-test  | 7  | 0.95 |
|             | NB      | T-test  | 12 | 0.75 |
|             | SVM     | T-test  | 5  | 0.95 |
|             | LR      | T-test  | 11 | 0.75 |
|             | KNN     | T-test  | 5  | 0.95 |
| HLA-B*15:01 | XGBoost | T-test  | 8  | 0.55 |

|             |         |         |    |      |
|-------------|---------|---------|----|------|
|             | Bagging | LR_RFE  | 10 | 0.95 |
|             | KNN     | SVM_RFE | 7  | 0.75 |
|             | SVM     | T-test  | 12 | 0.55 |
|             | Dtree   | T-test  | 14 | 0.75 |
|             | LR      | RF      | 18 | 0.95 |
|             | NB      | T-test  | 9  | 0.75 |
| HLA-B*18:01 | SVM     | T-test  | 5  | 0.75 |
|             | XGBoost | T-test  | 6  | 0.75 |
|             | Dtree   | T-test  | 9  | 0.75 |
|             | KNN     | T-test  | 5  | 0.75 |
|             | Bagging | T-test  | 6  | 0.75 |
|             | NB      | T-test  | 6  | 0.95 |
|             | LR      | T-test  | 7  | 0.95 |
| HLA-B*18:03 | Bagging | LR_RFE  | 8  | 0.95 |
|             | SVM     | T-test  | 5  | 0.75 |
|             | XGBoost | T-test  | 5  | 0.75 |
|             | NB      | T-test  | 5  | 0.75 |
|             | LR      | T-test  | 5  | 0.75 |
|             | KNN     | T-test  | 5  | 0.55 |
|             | Dtree   | T-test  | 5  | 0.75 |
| HLA-B*27:05 | LR      | RF      | 16 | 0.75 |
|             | KNN     | W-test  | 11 | 0.95 |
|             | XGBoost | LR_RFE  | 15 | 0.95 |
|             | SVM     | T-test  | 9  | 0.75 |
|             | Bagging | W-test  | 11 | 0.95 |
|             | NB      | W-test  | 14 | 0.95 |
|             | Dtree   | W-test  | 11 | 0.95 |
| HLA-B*27:09 | Bagging | T-test  | 7  | 0.55 |
|             | NB      | T-test  | 7  | 0.75 |
|             | Dtree   | T-test  | 6  | 0.75 |
|             | KNN     | T-test  | 7  | 0.55 |
|             | SVM     | T-test  | 7  | 0.55 |
|             | LR      | T-test  | 7  | 0.55 |
|             | XGBoost | T-test  | 7  | 0.55 |
| HLA-B*35:01 | Bagging | SVM_RFE | 6  | 0.55 |
|             | XGBoost | RF      | 10 | 0.75 |
|             | KNN     | RF      | 11 | 0.55 |
|             | Dtree   | RF      | 13 | 0.95 |
|             | LR      | T-test  | 8  | 0.75 |
|             | NB      | T-test  | 9  | 0.95 |
|             | SVM     | T-test  | 5  | 0.75 |
| HLA-B*37:01 | Dtree   | T-test  | 10 | 0.75 |
|             | LR      | T-test  | 5  | 0.75 |
|             | XGBoost | W-test  | 5  | 0.75 |

|             |         |         |    |      |
|-------------|---------|---------|----|------|
|             | NB      | T-test  | 5  | 0.95 |
|             | SVM     | T-test  | 7  | 0.55 |
|             | KNN     | T-test  | 7  | 0.55 |
|             | Bagging | T-test  | 10 | 0.75 |
| HLA-B*39:01 | LR      | T-test  | 12 | 0.75 |
|             | XGBoost | T-test  | 5  | 0.95 |
|             | NB      | SVM_RFE | 5  | 0.95 |
|             | Bagging | T-test  | 5  | 0.95 |
|             | KNN     | W-test  | 7  | 0.75 |
|             | Dtree   | T-test  | 7  | 0.95 |
|             | SVM     | T-test  | 5  | 0.95 |
| HLA-B*39:24 | Dtree   | T-test  | 11 | 0.75 |
|             | XGBoost | T-test  | 11 | 0.55 |
|             | Bagging | T-test  | 9  | 0.95 |
|             | NB      | T-test  | 9  | 0.95 |
|             | LR      | T-test  | 9  | 0.55 |
|             | KNN     | T-test  | 9  | 0.55 |
|             | SVM     | T-test  | 9  | 0.55 |
| HLA-B*40:01 | XGBoost | W-test  | 14 | 0.55 |
|             | NB      | W-test  | 7  | 0.75 |
|             | KNN     | T-test  | 9  | 0.55 |
|             | Dtree   | T-test  | 5  | 0.75 |
|             | LR      | T-test  | 5  | 0.75 |
|             | Bagging | T-test  | 5  | 0.75 |
|             | SVM     | T-test  | 5  | 0.75 |
| HLA-B*40:02 | XGBoost | T-test  | 12 | 0.75 |
|             | SVM     | RF      | 14 | 0.95 |
|             | KNN     | W-test  | 14 | 0.95 |
|             | NB      | SVM_RFE | 17 | 0.75 |
|             | LR      | T-test  | 12 | 0.55 |
|             | Bagging | RF      | 7  | 0.95 |
|             | Dtree   | SVM_RFE | 8  | 0.75 |
| HLA-B*44:02 | Dtree   | T-test  | 7  | 0.75 |
|             | NB      | T-test  | 7  | 0.75 |
|             | XGBoost | T-test  | 7  | 0.75 |
|             | KNN     | T-test  | 7  | 0.55 |
|             | SVM     | T-test  | 7  | 0.55 |
|             | LR      | T-test  | 6  | 0.95 |
|             | Bagging | T-test  | 5  | 0.75 |
| HLA-B*44:03 | SVM     | T-test  | 6  | 0.55 |
|             | NB      | T-test  | 5  | 0.55 |
|             | KNN     | T-test  | 5  | 0.75 |
|             | LR      | T-test  | 5  | 0.75 |
|             | XGBoost | T-test  | 5  | 0.95 |

|             |         |         |    |      |
|-------------|---------|---------|----|------|
|             | Bagging | T-test  | 5  | 0.95 |
|             | Dtree   | T-test  | 5  | 0.95 |
| HLA-B*46:01 | Dtree   | SVM_RFE | 12 | 0.55 |
|             | SVM     | T-test  | 5  | 0.75 |
|             | Bagging | T-test  | 8  | 0.95 |
|             | XGBoost | T-test  | 7  | 0.75 |
|             | LR      | T-test  | 5  | 0.75 |
|             | NB      | T-test  | 5  | 0.75 |
|             | KNN     | T-test  | 5  | 0.75 |
| HLA-B*49:01 | Dtree   | LR_RFE  | 8  | 0.95 |
|             | Bagging | LR_RFE  | 8  | 0.95 |
|             | XGBoost | LR_RFE  | 8  | 0.95 |
|             | LR      | SVM_RFE | 17 | 0.95 |
|             | KNN     | T-test  | 7  | 0.75 |
|             | SVM     | T-test  | 7  | 0.55 |
|             | NB      | W-test  | 17 | 0.95 |
| HLA-B*51:01 | NB      | SVM_RFE | 15 | 0.55 |
|             | Dtree   | LR_RFE  | 16 | 0.95 |
|             | LR      | W-test  | 16 | 0.55 |
|             | XGBoost | W-test  | 12 | 0.55 |
|             | Bagging | T-test  | 9  | 0.95 |
|             | SVM     | T-test  | 6  | 0.55 |
|             | KNN     | T-test  | 6  | 0.55 |
| HLA-B*51:08 | SVM     | T-test  | 5  | 0.55 |
|             | XGBoost | T-test  | 5  | 0.55 |
|             | KNN     | T-test  | 5  | 0.55 |
|             | NB      | T-test  | 5  | 0.55 |
|             | Bagging | T-test  | 5  | 0.55 |
|             | LR      | T-test  | 5  | 0.55 |
|             | Dtree   | T-test  | 5  | 0.55 |
| HLA-B*52:01 | Dtree   | T-test  | 6  | 0.75 |
|             | NB      | T-test  | 7  | 0.95 |
|             | SVM     | T-test  | 5  | 0.75 |
|             | XGBoost | T-test  | 6  | 0.55 |
|             | LR      | T-test  | 5  | 0.95 |
|             | KNN     | T-test  | 5  | 0.75 |
|             | Bagging | T-test  | 5  | 0.55 |
| HLA-B*54:01 | KNN     | SVM_RFE | 17 | 0.75 |
|             | LR      | SVM_RFE | 5  | 0.55 |
|             | Bagging | RF      | 17 | 0.95 |
|             | Dtree   | W-test  | 8  | 0.95 |
|             | NB      | T-test  | 18 | 0.95 |
|             | XGBoost | T-test  | 13 | 0.95 |
|             | SVM     | T-test  | 18 | 0.55 |

|             |         |         |    |      |
|-------------|---------|---------|----|------|
| HLA-B*57:01 | KNN     | T-test  | 15 | 0.95 |
|             | Dtree   | T-test  | 10 | 0.95 |
|             | NB      | T-test  | 18 | 0.75 |
|             | SVM     | T-test  | 10 | 0.55 |
|             | XGBoost | T-test  | 6  | 0.95 |
|             | Bagging | T-test  | 6  | 0.95 |
|             | LR      | T-test  | 10 | 0.95 |
| HLA-B*57:03 | Bagging | RF      | 18 | 0.55 |
|             | NB      | RF      | 8  | 0.75 |
|             | Dtree   | W-test  | 10 | 0.55 |
|             | SVM     | SVM_RFE | 8  | 0.55 |
|             | XGBoost | RF      | 8  | 0.55 |
|             | LR      | T-test  | 17 | 0.95 |
|             | KNN     | T-test  | 6  | 0.75 |
| HLA-B*58:01 | Dtree   | SVM_RFE | 11 | 0.95 |
|             | Bagging | SVM_RFE | 5  | 0.95 |
|             | XGBoost | T-test  | 9  | 0.95 |
|             | KNN     | RF      | 13 | 0.55 |
|             | NB      | T-test  | 9  | 0.95 |
|             | LR      | T-test  | 7  | 0.95 |
|             | SVM     | T-test  | 13 | 0.95 |
| HLA-C*01:02 | Dtree   | W-test  | 6  | 0.75 |
|             | SVM     | T-test  | 7  | 0.95 |
|             | LR      | T-test  | 7  | 0.75 |
|             | NB      | T-test  | 7  | 0.55 |
|             | KNN     | T-test  | 7  | 0.55 |
|             | XGBoost | T-test  | 5  | 0.75 |
|             | Bagging | T-test  | 5  | 0.75 |
| HLA-C*02:02 | Bagging | SVM_RFE | 5  | 0.95 |
|             | Dtree   | LR_RFE  | 7  | 0.75 |
|             | SVM     | T-test  | 5  | 0.75 |
|             | XGBoost | T-test  | 5  | 0.75 |
|             | KNN     | T-test  | 5  | 0.75 |
|             | NB      | T-test  | 5  | 0.75 |
|             | LR      | T-test  | 5  | 0.75 |
| HLA-C*03:03 | Dtree   | T-test  | 10 | 0.95 |
|             | Bagging | T-test  | 10 | 0.55 |
|             | LR      | T-test  | 5  | 0.95 |
|             | NB      | T-test  | 5  | 0.95 |
|             | SVM     | T-test  | 5  | 0.95 |
|             | XGBoost | T-test  | 5  | 0.75 |
|             | KNN     | T-test  | 5  | 0.75 |
| HLA-C*03:04 | NB      | LR_RFE  | 7  | 0.75 |
|             | Bagging | W-test  | 11 | 0.55 |



|             |         |         |    |      |
|-------------|---------|---------|----|------|
|             | SVM     | W-test  | 9  | 0.75 |
|             | KNN     | W-test  | 9  | 0.75 |
|             | LR      | T-test  | 11 | 0.75 |
|             | XGBoost | W-test  | 13 | 0.75 |
|             | Dtree   | W-test  | 13 | 0.75 |
| HLA-C*04:01 | Bagging | SVM_RFE | 13 | 0.75 |
|             | KNN     | T-test  | 15 | 0.55 |
|             | SVM     | T-test  | 6  | 0.55 |
|             | NB      | RF      | 9  | 0.95 |
|             | XGBoost | W-test  | 10 | 0.55 |
|             | LR      | T-test  | 12 | 0.75 |
|             | Dtree   | W-test  | 11 | 0.55 |
| HLA-C*05:01 | Dtree   | LR_RFE  | 9  | 0.75 |
|             | NB      | T-test  | 6  | 0.55 |
|             | XGBoost | SVM_RFE | 7  | 0.75 |
|             | SVM     | W-test  | 9  | 0.95 |
|             | LR      | T-test  | 8  | 0.95 |
|             | Bagging | T-test  | 7  | 0.55 |
|             | KNN     | T-test  | 6  | 0.95 |
| HLA-C*06:02 | Dtree   | W-test  | 17 | 0.55 |
|             | KNN     | T-test  | 6  | 0.55 |
|             | Bagging | T-test  | 6  | 0.95 |
|             | XGBoost | T-test  | 6  | 0.95 |
|             | LR      | T-test  | 6  | 0.55 |
|             | NB      | T-test  | 6  | 0.55 |
|             | SVM     | T-test  | 6  | 0.55 |
| HLA-C*07:01 | XGBoost | T-test  | 5  | 0.95 |
|             | LR      | T-test  | 5  | 0.75 |
|             | NB      | T-test  | 10 | 0.95 |
|             | KNN     | T-test  | 10 | 0.95 |
|             | Bagging | T-test  | 5  | 0.95 |
|             | SVM     | T-test  | 5  | 0.95 |
|             | Dtree   | T-test  | 11 | 0.95 |
| HLA-C*07:02 | NB      | W-test  | 6  | 0.95 |
|             | KNN     | T-test  | 12 | 0.95 |
|             | LR      | T-test  | 10 | 0.55 |
|             | SVM     | T-test  | 9  | 0.95 |
|             | Dtree   | T-test  | 8  | 0.95 |
|             | Bagging | T-test  | 8  | 0.95 |
|             | XGBoost | T-test  | 8  | 0.95 |
| HLA-C*07:04 | KNN     | RF      | 11 | 0.95 |
|             | SVM     | RF      | 11 | 0.95 |
|             | LR      | T-test  | 5  | 0.75 |
|             | Dtree   | T-test  | 5  | 0.95 |

|             |         |         |    |      |
|-------------|---------|---------|----|------|
|             | Bagging | T-test  | 5  | 0.95 |
|             | NB      | T-test  | 5  | 0.95 |
|             | XGBoost | T-test  | 5  | 0.95 |
| HLA-C*08:02 | Dtree   | RF      | 8  | 0.75 |
|             | Bagging | W-test  | 12 | 0.95 |
|             | XGBoost | T-test  | 14 | 0.75 |
|             | SVM     | T-test  | 5  | 0.75 |
|             | LR      | T-test  | 6  | 0.95 |
|             | KNN     | T-test  | 5  | 0.75 |
|             | NB      | T-test  | 6  | 0.95 |
| HLA-C*12:03 | XGBoost | T-test  | 5  | 0.55 |
|             | Dtree   | T-test  | 5  | 0.75 |
|             | NB      | T-test  | 5  | 0.95 |
|             | SVM     | T-test  | 8  | 0.75 |
|             | Bagging | T-test  | 8  | 0.75 |
|             | LR      | T-test  | 8  | 0.75 |
|             | KNN     | T-test  | 14 | 0.55 |
| HLA-C*14:02 | Bagging | RF      | 16 | 0.95 |
|             | NB      | T-test  | 5  | 0.95 |
|             | LR      | T-test  | 14 | 0.75 |
|             | XGBoost | T-test  | 12 | 0.75 |
|             | SVM     | T-test  | 6  | 0.55 |
|             | Dtree   | T-test  | 5  | 0.95 |
|             | KNN     | T-test  | 5  | 0.75 |
| HLA-C*15:02 | SVM     | T-test  | 6  | 0.95 |
|             | KNN     | T-test  | 7  | 0.55 |
|             | Bagging | W-test  | 6  | 0.75 |
|             | XGBoost | T-test  | 16 | 0.95 |
|             | LR      | T-test  | 8  | 0.75 |
|             | NB      | T-test  | 7  | 0.95 |
|             | Dtree   | W-test  | 6  | 0.75 |
| HLA-C*16:01 | NB      | T-test  | 7  | 0.95 |
|             | Dtree   | SVM_RFE | 5  | 0.75 |
|             | Bagging | LR_RFE  | 12 | 0.55 |
|             | LR      | W-test  | 12 | 0.95 |
|             | XGBoost | T-test  | 7  | 0.75 |
|             | KNN     | T-test  | 5  | 0.95 |
|             | SVM     | T-test  | 5  | 0.95 |
| HLA-C*17:01 | SVM     | T-test  | 5  | 0.55 |
|             | LR      | T-test  | 15 | 0.95 |
|             | XGBoost | T-test  | 5  | 0.55 |
|             | Dtree   | RF      | 6  | 0.55 |
|             | Bagging | T-test  | 5  | 0.55 |
|             | NB      | T-test  | 15 | 0.95 |

|             |             |         |         |      |      |
|-------------|-------------|---------|---------|------|------|
| 9           | HLA-A*01:01 | KNN     | T-test  | 15   | 0.95 |
|             |             | XGBoost | SVM_RFE | 12   | 0.55 |
|             |             | KNN     | LR_RFE  | 11   | 0.75 |
|             |             | NB      | RF      | 8    | 0.95 |
|             |             | SVM     | W-test  | 6    | 0.75 |
|             |             | LR      | T-test  | 18   | 0.75 |
|             |             | Bagging | SVM_RFE | 12   | 0.55 |
|             | HLA-A*02:01 | Dtree   | W-test  | 11   | 0.55 |
|             |             | LR      | SVM_RFE | 17   | 0.95 |
|             |             | SVM     | W-test  | 14   | 0.55 |
|             |             | NB      | SVM_RFE | 17   | 0.75 |
|             |             | XGBoost | LR_RFE  | 5    | 0.95 |
|             |             | KNN     | SVM_RFE | 18   | 0.95 |
|             |             | Bagging | T-test  | 5    | 0.95 |
|             | HLA-A*02:02 | Dtree   | T-test  | 5    | 0.95 |
|             |             | NB      | LR_RFE  | 9    | 0.95 |
|             |             | XGBoost | LR_RFE  | 12   | 0.55 |
|             |             | KNN     | RF      | 8    | 0.55 |
|             |             | SVM     | T-test  | 12   | 0.55 |
|             |             | LR      | T-test  | 14   | 0.95 |
|             |             | Bagging | W-test  | 5    | 0.75 |
|             | HLA-A*02:03 | Dtree   | RF      | 7    | 0.95 |
|             |             | LR      | W-test  | 18   | 0.95 |
|             |             | XGBoost | T-test  | 10   | 0.55 |
|             |             | NB      | T-test  | 11   | 0.95 |
|             |             | SVM     | T-test  | 5    | 0.75 |
|             |             | KNN     | T-test  | 16   | 0.55 |
| Bagging     |             | T-test  | 5       | 0.95 |      |
| HLA-A*02:04 | Dtree       | T-test  | 10      | 0.55 |      |
|             | SVM         | SVM_RFE | 17      | 0.95 |      |
|             | Bagging     | W-test  | 12      | 0.55 |      |
|             | KNN         | W-test  | 8       | 0.55 |      |
|             | XGBoost     | T-test  | 12      | 0.95 |      |
|             | LR          | T-test  | 15      | 0.95 |      |
|             | NB          | W-test  | 11      | 0.95 |      |
| HLA-B*07:02 | Dtree       | T-test  | 12      | 0.95 |      |
|             | KNN         | LR_RFE  | 7       | 0.75 |      |
|             | SVM         | LR_RFE  | 8       | 0.55 |      |
|             | LR          | SVM_RFE | 11      | 0.95 |      |
|             | XGBoost     | T-test  | 8       | 0.75 |      |
|             | Bagging     | RF      | 13      | 0.55 |      |
|             | NB          | SVM_RFE | 17      | 0.95 |      |
| HLA-B*08:01 | Dtree       | W-test  | 13      | 0.75 |      |
|             | XGBoost     | W-test  | 8       | 0.75 |      |

|             |         |         |    |      |
|-------------|---------|---------|----|------|
|             | SVM     | T-test  | 7  | 0.95 |
|             | KNN     | SVM_RFE | 10 | 0.55 |
|             | Bagging | W-test  | 8  | 0.55 |
|             | LR      | SVM_RFE | 13 | 0.75 |
|             | NB      | T-test  | 15 | 0.75 |
|             | Dtree   | SVM_RFE | 9  | 0.75 |
| HLA-B*13:02 | NB      | LR_RFE  | 11 | 0.55 |
|             | XGBoost | W-test  | 7  | 0.95 |
|             | KNN     | W-test  | 12 | 0.55 |
|             | LR      | T-test  | 12 | 0.95 |
|             | SVM     | T-test  | 8  | 0.75 |
|             | Bagging | T-test  | 9  | 0.95 |
|             | Dtree   | LR_RFE  | 15 | 0.95 |
| HLA-B*14:01 | Dtree   | RF      | 6  | 0.95 |
|             | SVM     | T-test  | 5  | 0.75 |
|             | Bagging | T-test  | 6  | 0.95 |
|             | XGBoost | T-test  | 6  | 0.95 |
|             | LR      | T-test  | 5  | 0.75 |
|             | NB      | T-test  | 5  | 0.75 |
|             | KNN     | T-test  | 5  | 0.55 |
| HLA-B*14:02 | KNN     | T-test  | 15 | 0.75 |
|             | SVM     | LR_RFE  | 5  | 0.75 |
|             | XGBoost | RF      | 6  | 0.95 |
|             | LR      | T-test  | 15 | 0.75 |
|             | NB      | T-test  | 18 | 0.55 |
|             | Bagging | SVM_RFE | 12 | 0.95 |
|             | Dtree   | RF      | 15 | 0.75 |
| HLA-B*15:01 | SVM     | T-test  | 15 | 0.75 |
|             | KNN     | T-test  | 9  | 0.75 |
|             | LR      | SVM_RFE | 15 | 0.95 |
|             | XGBoost | SVM_RFE | 15 | 0.75 |
|             | Bagging | SVM_RFE | 14 | 0.95 |
|             | NB      | SVM_RFE | 13 | 0.95 |
|             | Dtree   | W-test  | 7  | 0.55 |
| HLA-B*15:02 | NB      | LR_RFE  | 13 | 0.55 |
|             | LR      | RF      | 9  | 0.55 |
|             | Dtree   | T-test  | 8  | 0.95 |
|             | Bagging | T-test  | 8  | 0.95 |
|             | XGBoost | T-test  | 8  | 0.75 |
|             | KNN     | T-test  | 7  | 0.95 |
|             | SVM     | T-test  | 7  | 0.55 |
| HLA-B*15:03 | Dtree   | T-test  | 11 | 0.95 |
|             | KNN     | RF      | 16 | 0.75 |
|             | Bagging | T-test  | 11 | 0.95 |

|             |         |         |    |      |
|-------------|---------|---------|----|------|
|             | LR      | RF      | 8  | 0.75 |
|             | XGBoost | T-test  | 11 | 0.95 |
|             | SVM     | T-test  | 11 | 0.95 |
|             | NB      | W-test  | 9  | 0.95 |
| HLA-B*15:09 | Dtree   | SVM_RFE | 6  | 0.55 |
|             | Bagging | SVM_RFE | 6  | 0.55 |
|             | XGBoost | SVM_RFE | 6  | 0.55 |
|             | KNN     | T-test  | 5  | 0.75 |
|             | LR      | T-test  | 5  | 0.75 |
|             | NB      | T-test  | 5  | 0.75 |
|             | SVM     | T-test  | 5  | 0.75 |
| HLA-B*15:11 | SVM     | T-test  | 5  | 0.55 |
|             | KNN     | T-test  | 5  | 0.55 |
|             | NB      | T-test  | 5  | 0.55 |
|             | Bagging | T-test  | 5  | 0.95 |
|             | Dtree   | T-test  | 5  | 0.95 |
|             | XGBoost | T-test  | 7  | 0.95 |
|             | LR      | T-test  | 7  | 0.95 |
| HLA-B*15:17 | Bagging | W-test  | 13 | 0.95 |
|             | NB      | LR_RFE  | 8  | 0.55 |
|             | SVM     | SVM_RFE | 6  | 0.95 |
|             | KNN     | T-test  | 6  | 0.75 |
|             | Dtree   | SVM_RFE | 7  | 0.95 |
|             | XGBoost | T-test  | 8  | 0.95 |
|             | LR      | T-test  | 7  | 0.95 |
| HLA-B*15:18 | Dtree   | SVM_RFE | 11 | 0.75 |
|             | SVM     | T-test  | 5  | 0.95 |
|             | LR      | T-test  | 9  | 0.75 |
|             | NB      | T-test  | 9  | 0.75 |
|             | XGBoost | T-test  | 8  | 0.75 |
|             | Bagging | T-test  | 6  | 0.75 |
|             | KNN     | T-test  | 6  | 0.55 |
| HLA-B*15:42 | XGBoost | SVM_RFE | 5  | 0.95 |
|             | Bagging | SVM_RFE | 5  | 0.75 |
|             | Dtree   | RF      | 11 | 0.55 |
|             | KNN     | W-test  | 14 | 0.55 |
|             | SVM     | W-test  | 14 | 0.55 |
|             | NB      | LR_RFE  | 7  | 0.75 |
|             | LR      | T-test  | 7  | 0.55 |
| HLA-B*18:01 | LR      | RF      | 17 | 0.75 |
|             | SVM     | RF      | 17 | 0.55 |
|             | KNN     | RF      | 17 | 0.55 |
|             | XGBoost | LR_RFE  | 16 | 0.95 |
|             | Bagging | LR_RFE  | 16 | 0.55 |

|             |         |         |    |      |
|-------------|---------|---------|----|------|
|             | NB      | RF      | 14 | 0.95 |
|             | Dtree   | SVM_RFE | 17 | 0.55 |
| HLA-B*18:03 | KNN     | SVM_RFE | 16 | 0.75 |
|             | NB      | RF      | 12 | 0.55 |
|             | Dtree   | W-test  | 6  | 0.95 |
|             | Bagging | W-test  | 6  | 0.95 |
|             | XGBoost | W-test  | 6  | 0.95 |
|             | SVM     | T-test  | 6  | 0.55 |
|             | LR      | T-test  | 7  | 0.55 |
| HLA-B*27:01 | NB      | SVM_RFE | 5  | 0.55 |
|             | LR      | LR_RFE  | 8  | 0.55 |
|             | KNN     | LR_RFE  | 14 | 0.95 |
|             | Bagging | W-test  | 5  | 0.95 |
|             | SVM     | T-test  | 5  | 0.75 |
|             | XGBoost | T-test  | 5  | 0.75 |
|             | Dtree   | T-test  | 5  | 0.95 |
| HLA-B*27:02 | Bagging | LR_RFE  | 11 | 0.75 |
|             | XGBoost | W-test  | 11 | 0.55 |
|             | NB      | W-test  | 10 | 0.55 |
|             | KNN     | T-test  | 5  | 0.95 |
|             | LR      | T-test  | 7  | 0.95 |
|             | Dtree   | T-test  | 6  | 0.55 |
|             | SVM     | T-test  | 6  | 0.55 |
| HLA-B*27:03 | Dtree   | T-test  | 10 | 0.95 |
|             | XGBoost | T-test  | 5  | 0.95 |
|             | Bagging | T-test  | 10 | 0.95 |
|             | SVM     | T-test  | 6  | 0.75 |
|             | KNN     | T-test  | 5  | 0.75 |
|             | LR      | T-test  | 5  | 0.95 |
|             | NB      | T-test  | 5  | 0.95 |
| HLA-B*27:04 | XGBoost | RF      | 10 | 0.95 |
|             | LR      | W-test  | 6  | 0.95 |
|             | NB      | RF      | 11 | 0.95 |
|             | KNN     | RF      | 10 | 0.75 |
|             | Bagging | W-test  | 7  | 0.55 |
|             | Dtree   | SVM_RFE | 12 | 0.55 |
|             | SVM     | W-test  | 7  | 0.55 |
| HLA-B*27:05 | LR      | LR_RFE  | 16 | 0.75 |
|             | NB      | SVM_RFE | 15 | 0.55 |
|             | SVM     | W-test  | 7  | 0.55 |
|             | XGBoost | SVM_RFE | 9  | 0.95 |
|             | KNN     | T-test  | 7  | 0.75 |
|             | Bagging | RF      | 7  | 0.75 |
|             | Dtree   | RF      | 7  | 0.75 |

|             |         |         |    |      |
|-------------|---------|---------|----|------|
| HLA-B*27:06 | Bagging | T-test  | 6  | 0.95 |
|             | NB      | T-test  | 11 | 0.95 |
|             | XGBoost | RF      | 9  | 0.95 |
|             | LR      | W-test  | 8  | 0.75 |
|             | Dtree   | RF      | 16 | 0.55 |
|             | KNN     | W-test  | 9  | 0.95 |
|             | SVM     | T-test  | 5  | 0.75 |
| HLA-B*27:07 | SVM     | T-test  | 5  | 0.95 |
|             | KNN     | T-test  | 5  | 0.75 |
|             | Bagging | T-test  | 8  | 0.55 |
|             | NB      | T-test  | 6  | 0.95 |
|             | Dtree   | T-test  | 6  | 0.75 |
|             | XGBoost | T-test  | 6  | 0.75 |
|             | LR      | T-test  | 8  | 0.95 |
| HLA-B*27:08 | KNN     | T-test  | 6  | 0.55 |
|             | SVM     | T-test  | 6  | 0.55 |
|             | Bagging | RF      | 12 | 0.75 |
|             | XGBoost | W-test  | 9  | 0.55 |
|             | LR      | T-test  | 12 | 0.75 |
|             | NB      | T-test  | 6  | 0.75 |
|             | Dtree   | SVM_RFE | 5  | 0.75 |
| HLA-B*27:09 | NB      | SVM_RFE | 17 | 0.55 |
|             | LR      | SVM_RFE | 9  | 0.95 |
|             | KNN     | W-test  | 7  | 0.95 |
|             | XGBoost | W-test  | 7  | 0.95 |
|             | SVM     | T-test  | 7  | 0.95 |
|             | Bagging | SVM_RFE | 12 | 0.75 |
|             | Dtree   | W-test  | 10 | 0.95 |
| HLA-B*27:20 | LR      | T-test  | 15 | 0.75 |
|             | Dtree   | RF      | 8  | 0.75 |
|             | Bagging | RF      | 11 | 0.75 |
|             | XGBoost | SVM_RFE | 10 | 0.75 |
|             | KNN     | LR_RFE  | 15 | 0.75 |
|             | SVM     | T-test  | 5  | 0.55 |
|             | NB      | T-test  | 5  | 0.55 |
| HLA-B*35:01 | LR      | RF      | 16 | 0.95 |
|             | SVM     | W-test  | 5  | 0.55 |
|             | NB      | T-test  | 10 | 0.75 |
|             | XGBoost | T-test  | 6  | 0.75 |
|             | KNN     | W-test  | 5  | 0.55 |
|             | Bagging | SVM_RFE | 11 | 0.95 |
|             | Dtree   | SVM_RFE | 6  | 0.75 |
| HLA-B*35:03 | LR      | RF      | 15 | 0.95 |
|             | SVM     | W-test  | 5  | 0.95 |

|             |         |         |    |      |
|-------------|---------|---------|----|------|
|             | KNN     | W-test  | 8  | 0.95 |
|             | Bagging | LR_RFE  | 12 | 0.75 |
|             | Dtree   | RF      | 9  | 0.55 |
|             | NB      | T-test  | 8  | 0.95 |
|             | XGBoost | T-test  | 8  | 0.75 |
| HLA-B*35:08 | XGBoost | LR_RFE  | 9  | 0.95 |
|             | Dtree   | RF      | 5  | 0.75 |
|             | Bagging | T-test  | 9  | 0.55 |
|             | KNN     | T-test  | 9  | 0.55 |
|             | LR      | T-test  | 12 | 0.75 |
|             | SVM     | T-test  | 11 | 0.95 |
|             | NB      | T-test  | 8  | 0.95 |
| HLA-B*37:01 | KNN     | LR_RFE  | 10 | 0.55 |
|             | XGBoost | T-test  | 8  | 0.55 |
|             | LR      | T-test  | 11 | 0.95 |
|             | Dtree   | W-test  | 6  | 0.75 |
|             | NB      | T-test  | 6  | 0.55 |
|             | Bagging | W-test  | 6  | 0.75 |
|             | SVM     | T-test  | 5  | 0.75 |
| HLA-B*38:01 | NB      | LR_RFE  | 8  | 0.95 |
|             | SVM     | T-test  | 7  | 0.75 |
|             | KNN     | SVM_RFE | 15 | 0.95 |
|             | LR      | T-test  | 9  | 0.95 |
|             | Bagging | RF      | 10 | 0.95 |
|             | XGBoost | W-test  | 16 | 0.95 |
|             | Dtree   | W-test  | 16 | 0.95 |
| HLA-B*39:01 | KNN     | SVM_RFE | 9  | 0.75 |
|             | XGBoost | W-test  | 13 | 0.75 |
|             | LR      | T-test  | 12 | 0.75 |
|             | Bagging | SVM_RFE | 8  | 0.95 |
|             | NB      | W-test  | 8  | 0.95 |
|             | SVM     | RF      | 8  | 0.55 |
|             | Dtree   | T-test  | 5  | 0.75 |
| HLA-B*39:06 | LR      | T-test  | 5  | 0.95 |
|             | KNN     | RF      | 10 | 0.55 |
|             | SVM     | W-test  | 15 | 0.95 |
|             | Dtree   | T-test  | 13 | 0.95 |
|             | XGBoost | T-test  | 13 | 0.95 |
|             | Bagging | T-test  | 10 | 0.75 |
|             | NB      | T-test  | 10 | 0.55 |
| HLA-B*39:24 | Dtree   | T-test  | 7  | 0.55 |
|             | Bagging | T-test  | 6  | 0.95 |
|             | NB      | T-test  | 6  | 0.55 |
|             | XGBoost | T-test  | 6  | 0.55 |



|             |         |         |    |      |
|-------------|---------|---------|----|------|
|             | LR      | T-test  | 5  | 0.95 |
|             | SVM     | T-test  | 5  | 0.75 |
|             | KNN     | T-test  | 5  | 0.95 |
| HLA-C*01:02 | LR      | RF      | 11 | 0.95 |
|             | SVM     | T-test  | 12 | 0.55 |
|             | KNN     | T-test  | 14 | 0.75 |
|             | NB      | RF      | 11 | 0.75 |
|             | Dtree   | W-test  | 10 | 0.95 |
|             | Bagging | W-test  | 10 | 0.95 |
|             | XGBoost | W-test  | 5  | 0.95 |
| HLA-C*02:02 | KNN     | RF      | 14 | 0.75 |
|             | XGBoost | RF      | 7  | 0.55 |
|             | LR      | RF      | 14 | 0.95 |
|             | NB      | SVM_RFE | 15 | 0.75 |
|             | SVM     | RF      | 14 | 0.75 |
|             | Dtree   | SVM_RFE | 14 | 0.95 |
|             | Bagging | SVM_RFE | 6  | 0.75 |
| HLA-C*03:03 | NB      | LR_RFE  | 11 | 0.55 |
|             | LR      | LR_RFE  | 11 | 0.75 |
|             | XGBoost | SVM_RFE | 13 | 0.75 |
|             | KNN     | W-test  | 10 | 0.95 |
|             | SVM     | T-test  | 16 | 0.95 |
|             | Bagging | W-test  | 11 | 0.75 |
|             | Dtree   | W-test  | 11 | 0.55 |
| HLA-C*03:04 | XGBoost | T-test  | 13 | 0.75 |
|             | KNN     | SVM_RFE | 9  | 0.55 |
|             | NB      | LR_RFE  | 11 | 0.95 |
|             | SVM     | T-test  | 12 | 0.75 |
|             | LR      | RF      | 16 | 0.95 |
|             | Bagging | RF      | 8  | 0.95 |
|             | Dtree   | W-test  | 5  | 0.75 |
| HLA-C*04:01 | XGBoost | T-test  | 7  | 0.75 |
|             | KNN     | T-test  | 11 | 0.55 |
|             | NB      | SVM_RFE | 12 | 0.55 |
|             | Bagging | W-test  | 12 | 0.55 |
|             | SVM     | T-test  | 12 | 0.55 |
|             | LR      | LR_RFE  | 16 | 0.75 |
|             | Dtree   | W-test  | 12 | 0.55 |
| HLA-C*05:01 | SVM     | T-test  | 5  | 0.95 |
|             | XGBoost | SVM_RFE | 11 | 0.55 |
|             | LR      | T-test  | 16 | 0.75 |
|             | NB      | T-test  | 12 | 0.75 |
|             | KNN     | W-test  | 5  | 0.75 |
|             | Bagging | SVM_RFE | 11 | 0.75 |

|             |         |         |    |      |
|-------------|---------|---------|----|------|
|             | Dtree   | W-test  | 11 | 0.55 |
| HLA-C*06:02 | Bagging | T-test  | 18 | 0.75 |
|             | XGBoost | LR_RFE  | 15 | 0.55 |
|             | KNN     | LR_RFE  | 16 | 0.95 |
|             | NB      | W-test  | 5  | 0.75 |
|             | SVM     | T-test  | 18 | 0.75 |
|             | LR      | T-test  | 11 | 0.95 |
|             | Dtree   | T-test  | 15 | 0.95 |
| HLA-C*07:01 | XGBoost | LR_RFE  | 12 | 0.75 |
|             | KNN     | RF      | 11 | 0.75 |
|             | SVM     | T-test  | 13 | 0.55 |
|             | LR      | LR_RFE  | 11 | 0.75 |
|             | Bagging | T-test  | 5  | 0.75 |
|             | Dtree   | RF      | 12 | 0.95 |
|             | NB      | T-test  | 12 | 0.75 |
| HLA-C*07:02 | XGBoost | T-test  | 11 | 0.75 |
|             | Bagging | T-test  | 11 | 0.55 |
|             | SVM     | RF      | 13 | 0.55 |
|             | LR      | T-test  | 18 | 0.75 |
|             | KNN     | T-test  | 18 | 0.75 |
|             | NB      | T-test  | 13 | 0.95 |
|             | Dtree   | T-test  | 11 | 0.55 |
| HLA-C*07:04 | KNN     | T-test  | 11 | 0.95 |
|             | LR      | T-test  | 7  | 0.95 |
|             | XGBoost | W-test  | 15 | 0.95 |
|             | NB      | T-test  | 5  | 0.75 |
|             | Bagging | LR_RFE  | 11 | 0.75 |
|             | SVM     | W-test  | 17 | 0.95 |
|             | Dtree   | W-test  | 11 | 0.95 |
| HLA-C*08:02 | KNN     | LR_RFE  | 15 | 0.75 |
|             | XGBoost | T-test  | 12 | 0.55 |
|             | LR      | RF      | 11 | 0.95 |
|             | SVM     | W-test  | 6  | 0.55 |
|             | Bagging | T-test  | 12 | 0.55 |
|             | NB      | W-test  | 6  | 0.55 |
|             | Dtree   | LR_RFE  | 6  | 0.95 |
| HLA-C*12:03 | SVM     | SVM_RFE | 12 | 0.95 |
|             | NB      | W-test  | 14 | 0.75 |
|             | KNN     | W-test  | 12 | 0.95 |
|             | LR      | T-test  | 14 | 0.75 |
|             | Bagging | RF      | 12 | 0.75 |
|             | Dtree   | W-test  | 15 | 0.55 |
|             | XGBoost | T-test  | 6  | 0.75 |
| HLA-C*14:02 | XGBoost | LR_RFE  | 12 | 0.95 |

|    |             |         |         |    |      |
|----|-------------|---------|---------|----|------|
|    |             | Bagging | SVM_RFE | 6  | 0.55 |
|    |             | LR      | W-test  | 11 | 0.75 |
|    |             | SVM     | T-test  | 7  | 0.95 |
|    |             | Dtree   | T-test  | 13 | 0.55 |
|    |             | NB      | T-test  | 9  | 0.95 |
|    |             | KNN     | T-test  | 6  | 0.55 |
|    | HLA-C*15:02 | NB      | SVM_RFE | 14 | 0.75 |
|    |             | KNN     | T-test  | 5  | 0.75 |
|    |             | Dtree   | T-test  | 7  | 0.95 |
|    |             | Bagging | SVM_RFE | 9  | 0.55 |
|    |             | XGBoost | T-test  | 7  | 0.95 |
|    |             | LR      | T-test  | 13 | 0.75 |
|    |             | SVM     | T-test  | 5  | 0.95 |
|    | HLA-C*16:01 | NB      | SVM_RFE | 10 | 0.75 |
|    |             | Dtree   | SVM_RFE | 13 | 0.55 |
|    |             | Bagging | SVM_RFE | 13 | 0.55 |
|    |             | SVM     | RF      | 9  | 0.75 |
|    |             | LR      | T-test  | 9  | 0.95 |
|    |             | XGBoost | T-test  | 5  | 0.75 |
|    |             | KNN     | RF      | 17 | 0.95 |
|    | HLA-C*17:01 | KNN     | SVM_RFE | 9  | 0.75 |
|    |             | NB      | SVM_RFE | 7  | 0.55 |
|    |             | LR      | T-test  | 11 | 0.95 |
|    |             | SVM     | T-test  | 5  | 0.95 |
|    |             | Dtree   | RF      | 8  | 0.95 |
|    |             | Bagging | RF      | 8  | 0.95 |
|    |             | XGBoost | T-test  | 7  | 0.95 |
| 10 | HLA-A*01:01 | KNN     | T-test  | 10 | 0.55 |
|    |             | LR      | W-test  | 13 | 0.95 |
|    |             | SVM     | SVM_RFE | 15 | 0.55 |
|    |             | NB      | T-test  | 13 | 0.95 |
|    |             | Bagging | T-test  | 12 | 0.95 |
|    |             | XGBoost | T-test  | 13 | 0.55 |
|    |             | Dtree   | RF      | 6  | 0.95 |
|    | HLA-A*02:01 | SVM     | T-test  | 14 | 0.95 |
|    |             | LR      | SVM_RFE | 18 | 0.55 |
|    |             | NB      | T-test  | 13 | 0.95 |
|    |             | KNN     | RF      | 6  | 0.75 |
|    |             | XGBoost | SVM_RFE | 6  | 0.55 |
|    |             | Bagging | T-test  | 6  | 0.75 |
|    |             | Dtree   | T-test  | 6  | 0.75 |
|    | HLA-A*02:02 | NB      | T-test  | 14 | 0.75 |
|    |             | SVM     | SVM_RFE | 6  | 0.75 |
|    |             | LR      | T-test  | 18 | 0.75 |

|             |         |         |    |      |
|-------------|---------|---------|----|------|
|             | XGBoost | T-test  | 13 | 0.55 |
|             | KNN     | RF      | 15 | 0.55 |
|             | Bagging | RF      | 9  | 0.95 |
|             | Dtree   | W-test  | 11 | 0.55 |
| HLA-A*02:03 | NB      | W-test  | 11 | 0.95 |
|             | LR      | LR_RFE  | 15 | 0.55 |
|             | KNN     | LR_RFE  | 14 | 0.75 |
|             | SVM     | W-test  | 14 | 0.55 |
|             | XGBoost | T-test  | 12 | 0.55 |
|             | Bagging | T-test  | 11 | 0.95 |
|             | Dtree   | T-test  | 10 | 0.95 |
| HLA-A*02:04 | SVM     | RF      | 8  | 0.55 |
|             | Dtree   | T-test  | 6  | 0.55 |
|             | Bagging | T-test  | 6  | 0.55 |
|             | XGBoost | T-test  | 6  | 0.55 |
|             | LR      | T-test  | 5  | 0.95 |
|             | KNN     | T-test  | 5  | 0.75 |
|             | NB      | T-test  | 5  | 0.95 |
| HLA-A*02:05 | NB      | LR_RFE  | 9  | 0.75 |
|             | SVM     | T-test  | 14 | 0.75 |
|             | KNN     | T-test  | 9  | 0.55 |
|             | Dtree   | T-test  | 8  | 0.95 |
|             | Bagging | T-test  | 8  | 0.95 |
|             | XGBoost | T-test  | 8  | 0.95 |
|             | LR      | T-test  | 7  | 0.95 |
| HLA-A*02:06 | KNN     | SVM_RFE | 9  | 0.55 |
|             | XGBoost | SVM_RFE | 8  | 0.75 |
|             | SVM     | SVM_RFE | 12 | 0.75 |
|             | LR      | LR_RFE  | 8  | 0.95 |
|             | Bagging | W-test  | 5  | 0.75 |
|             | NB      | SVM_RFE | 6  | 0.95 |
|             | Dtree   | SVM_RFE | 16 | 0.95 |
| HLA-A*02:07 | Bagging | SVM_RFE | 12 | 0.95 |
|             | SVM     | T-test  | 6  | 0.75 |
|             | NB      | T-test  | 13 | 0.75 |
|             | Dtree   | T-test  | 12 | 0.75 |
|             | XGBoost | T-test  | 8  | 0.95 |
|             | LR      | T-test  | 7  | 0.95 |
|             | KNN     | T-test  | 6  | 0.75 |
| HLA-A*02:17 | Dtree   | LR_RFE  | 9  | 0.55 |
|             | XGBoost | LR_RFE  | 9  | 0.55 |
|             | Bagging | LR_RFE  | 6  | 0.75 |
|             | KNN     | T-test  | 5  | 0.75 |
|             | LR      | T-test  | 5  | 0.75 |

|             |         |         |    |      |
|-------------|---------|---------|----|------|
|             | NB      | T-test  | 5  | 0.75 |
|             | SVM     | T-test  | 5  | 0.75 |
| HLA-A*03:01 | KNN     | RF      | 11 | 0.95 |
|             | XGBoost | LR_RFE  | 9  | 0.95 |
|             | SVM     | T-test  | 9  | 0.75 |
|             | LR      | SVM_RFE | 11 | 0.75 |
|             | Bagging | T-test  | 11 | 0.95 |
|             | NB      | T-test  | 12 | 0.55 |
|             | Dtree   | SVM_RFE | 14 | 0.55 |
| HLA-A*11:01 | XGBoost | SVM_RFE | 7  | 0.55 |
|             | KNN     | W-test  | 8  | 0.55 |
|             | NB      | SVM_RFE | 18 | 0.55 |
|             | LR      | T-test  | 13 | 0.95 |
|             | SVM     | W-test  | 6  | 0.75 |
|             | Bagging | T-test  | 8  | 0.75 |
|             | Dtree   | SVM_RFE | 13 | 0.95 |
| HLA-A*23:01 | NB      | RF      | 13 | 0.95 |
|             | KNN     | RF      | 7  | 0.55 |
|             | SVM     | W-test  | 14 | 0.55 |
|             | Bagging | W-test  | 12 | 0.75 |
|             | XGBoost | W-test  | 12 | 0.75 |
|             | LR      | W-test  | 12 | 0.55 |
|             | Dtree   | T-test  | 11 | 0.75 |
| HLA-A*24:02 | KNN     | SVM_RFE | 9  | 0.55 |
|             | Bagging | T-test  | 15 | 0.75 |
|             | XGBoost | SVM_RFE | 6  | 0.75 |
|             | LR      | RF      | 14 | 0.95 |
|             | NB      | T-test  | 13 | 0.95 |
|             | SVM     | T-test  | 10 | 0.55 |
|             | Dtree   | T-test  | 5  | 0.75 |
| HLA-A*24:06 | XGBoost | T-test  | 9  | 0.55 |
|             | Dtree   | T-test  | 8  | 0.75 |
|             | LR      | T-test  | 8  | 0.75 |
|             | Bagging | T-test  | 8  | 0.75 |
|             | KNN     | T-test  | 8  | 0.75 |
|             | SVM     | T-test  | 8  | 0.75 |
|             | NB      | T-test  | 8  | 0.55 |
| HLA-A*26:01 | LR      | LR_RFE  | 18 | 0.75 |
|             | NB      | T-test  | 5  | 0.95 |
|             | Bagging | LR_RFE  | 8  | 0.75 |
|             | XGBoost | W-test  | 15 | 0.55 |
|             | KNN     | T-test  | 6  | 0.55 |
|             | SVM     | T-test  | 6  | 0.55 |
|             | Dtree   | T-test  | 5  | 0.55 |

|             |         |         |    |      |
|-------------|---------|---------|----|------|
| HLA-A*29:02 | LR      | LR_RFE  | 12 | 0.75 |
|             | NB      | RF      | 13 | 0.75 |
|             | SVM     | W-test  | 14 | 0.55 |
|             | KNN     | LR_RFE  | 18 | 0.95 |
|             | XGBoost | RF      | 14 | 0.95 |
|             | Bagging | T-test  | 13 | 0.55 |
|             | Dtree   | SVM_RFE | 8  | 0.55 |
| HLA-A*30:01 | XGBoost | SVM_RFE | 6  | 0.75 |
|             | KNN     | W-test  | 12 | 0.75 |
|             | SVM     | W-test  | 12 | 0.75 |
|             | Dtree   | T-test  | 12 | 0.55 |
|             | Bagging | T-test  | 6  | 0.75 |
|             | NB      | W-test  | 5  | 0.95 |
| HLA-A*30:02 | LR      | T-test  | 7  | 0.75 |
|             | Dtree   | SVM_RFE | 7  | 0.55 |
|             | Bagging | T-test  | 12 | 0.55 |
|             | LR      | T-test  | 8  | 0.75 |
|             | KNN     | T-test  | 9  | 0.55 |
|             | XGBoost | T-test  | 9  | 0.95 |
|             | SVM     | T-test  | 9  | 0.55 |
| HLA-A*31:01 | NB      | RF      | 18 | 0.95 |
|             | XGBoost | LR_RFE  | 11 | 0.95 |
|             | KNN     | SVM_RFE | 14 | 0.55 |
|             | SVM     | RF      | 17 | 0.75 |
|             | Bagging | SVM_RFE | 17 | 0.95 |
|             | NB      | RF      | 17 | 0.95 |
|             | LR      | T-test  | 15 | 0.95 |
| HLA-A*32:01 | Dtree   | RF      | 10 | 0.95 |
|             | SVM     | LR_RFE  | 11 | 0.95 |
|             | NB      | W-test  | 12 | 0.95 |
|             | LR      | T-test  | 18 | 0.75 |
|             | XGBoost | T-test  | 10 | 0.95 |
|             | KNN     | T-test  | 10 | 0.55 |
|             | Bagging | RF      | 11 | 0.75 |
| HLA-A*33:01 | Dtree   | RF      | 5  | 0.95 |
|             | Dtree   | LR_RFE  | 9  | 0.75 |
|             | LR      | RF      | 18 | 0.95 |
|             | SVM     | T-test  | 6  | 0.55 |
|             | KNN     | T-test  | 10 | 0.95 |
|             | NB      | T-test  | 8  | 0.75 |
|             | Bagging | T-test  | 6  | 0.95 |
| HLA-A*68:01 | XGBoost | T-test  | 6  | 0.55 |
|             | LR      | LR_RFE  | 17 | 0.55 |
|             | XGBoost | T-test  | 6  | 0.75 |

|             |         |         |    |      |
|-------------|---------|---------|----|------|
|             | KNN     | SVM_RFE | 12 | 0.55 |
|             | NB      | T-test  | 7  | 0.75 |
|             | SVM     | T-test  | 6  | 0.55 |
|             | Bagging | T-test  | 8  | 0.95 |
|             | Dtree   | SVM_RFE | 6  | 0.55 |
| HLA-A*68:02 | NB      | LR_RFE  | 11 | 0.55 |
|             | XGBoost | W-test  | 8  | 0.55 |
|             | KNN     | LR_RFE  | 8  | 0.75 |
|             | Bagging | W-test  | 8  | 0.95 |
|             | SVM     | RF      | 5  | 0.75 |
|             | LR      | T-test  | 10 | 0.95 |
|             | Dtree   | SVM_RFE | 7  | 0.95 |
| HLA-A*69:01 | SVM     | T-test  | 5  | 0.75 |
|             | XGBoost | T-test  | 5  | 0.75 |
|             | KNN     | T-test  | 5  | 0.75 |
|             | Bagging | T-test  | 5  | 0.75 |
|             | LR      | T-test  | 5  | 0.75 |
|             | Dtree   | T-test  | 5  | 0.75 |
|             | NB      | T-test  | 5  | 0.95 |
| HLA-B*07:02 | LR      | T-test  | 16 | 0.95 |
|             | NB      | LR_RFE  | 8  | 0.95 |
|             | XGBoost | W-test  | 16 | 0.55 |
|             | SVM     | LR_RFE  | 11 | 0.55 |
|             | Bagging | SVM_RFE | 9  | 0.95 |
|             | KNN     | T-test  | 8  | 0.55 |
|             | Dtree   | SVM_RFE | 9  | 0.95 |
| HLA-B*08:01 | XGBoost | SVM_RFE | 13 | 0.75 |
|             | NB      | SVM_RFE | 7  | 0.55 |
|             | SVM     | SVM_RFE | 5  | 0.75 |
|             | KNN     | RF      | 13 | 0.75 |
|             | Bagging | T-test  | 5  | 0.95 |
|             | Dtree   | T-test  | 5  | 0.95 |
|             | LR      | T-test  | 5  | 0.75 |
| HLA-B*13:02 | NB      | T-test  | 8  | 0.55 |
|             | KNN     | T-test  | 5  | 0.55 |
|             | Dtree   | T-test  | 7  | 0.95 |
|             | XGBoost | T-test  | 7  | 0.95 |
|             | LR      | T-test  | 7  | 0.75 |
|             | Bagging | T-test  | 6  | 0.75 |
|             | SVM     | T-test  | 6  | 0.55 |
| HLA-B*14:02 | XGBoost | T-test  | 5  | 0.55 |
|             | Bagging | T-test  | 5  | 0.55 |
|             | Dtree   | T-test  | 5  | 0.55 |
|             | SVM     | T-test  | 5  | 0.75 |

|             |         |         |    |      |
|-------------|---------|---------|----|------|
|             | KNN     | T-test  | 5  | 0.75 |
|             | LR      | T-test  | 5  | 0.95 |
|             | NB      | T-test  | 6  | 0.95 |
| HLA-B*15:01 | LR      | SVM_RFE | 18 | 0.55 |
|             | SVM     | T-test  | 5  | 0.75 |
|             | Bagging | SVM_RFE | 14 | 0.95 |
|             | XGBoost | SVM_RFE | 14 | 0.75 |
|             | NB      | T-test  | 6  | 0.75 |
|             | KNN     | SVM_RFE | 5  | 0.95 |
|             | Dtree   | SVM_RFE | 13 | 0.95 |
| HLA-B*18:01 | LR      | LR_RFE  | 12 | 0.75 |
|             | XGBoost | T-test  | 7  | 0.75 |
|             | KNN     | W-test  | 11 | 0.95 |
|             | SVM     | W-test  | 11 | 0.95 |
|             | NB      | T-test  | 10 | 0.55 |
|             | Bagging | T-test  | 7  | 0.75 |
|             | Dtree   | T-test  | 7  | 0.75 |
| HLA-B*27:01 | LR      | T-test  | 6  | 0.75 |
|             | Bagging | T-test  | 5  | 0.95 |
|             | NB      | T-test  | 5  | 0.95 |
|             | KNN     | T-test  | 5  | 0.95 |
|             | XGBoost | T-test  | 5  | 0.95 |
|             | SVM     | T-test  | 5  | 0.95 |
|             | Dtree   | T-test  | 5  | 0.75 |
| HLA-B*27:02 | LR      | RF      | 16 | 0.95 |
|             | Bagging | RF      | 9  | 0.95 |
|             | XGBoost | T-test  | 7  | 0.95 |
|             | KNN     | T-test  | 5  | 0.95 |
|             | NB      | T-test  | 6  | 0.95 |
|             | Dtree   | T-test  | 7  | 0.95 |
|             | SVM     | T-test  | 5  | 0.95 |
| HLA-B*27:03 | KNN     | T-test  | 5  | 0.75 |
|             | SVM     | T-test  | 5  | 0.75 |
|             | LR      | T-test  | 5  | 0.95 |
|             | Bagging | T-test  | 5  | 0.95 |
|             | NB      | T-test  | 5  | 0.95 |
|             | XGBoost | T-test  | 5  | 0.95 |
|             | Dtree   | T-test  | 5  | 0.95 |
| HLA-B*27:04 | SVM     | T-test  | 5  | 0.55 |
|             | KNN     | T-test  | 5  | 0.55 |
|             | LR      | T-test  | 5  | 0.55 |
|             | XGBoost | T-test  | 5  | 0.75 |
|             | NB      | T-test  | 5  | 0.75 |
|             | Bagging | T-test  | 9  | 0.75 |



|             |         |         |    |      |
|-------------|---------|---------|----|------|
|             | Dtree   | W-test  | 5  | 0.95 |
| HLA-B*27:05 | NB      | SVM_RFE | 11 | 0.95 |
|             | SVM     | W-test  | 5  | 0.75 |
|             | LR      | SVM_RFE | 17 | 0.75 |
|             | KNN     | T-test  | 10 | 0.55 |
|             | XGBoost | SVM_RFE | 5  | 0.75 |
|             | Bagging | SVM_RFE | 5  | 0.75 |
|             | Dtree   | LR_RFE  | 5  | 0.95 |
| HLA-B*27:06 | Dtree   | W-test  | 5  | 0.75 |
|             | XGBoost | W-test  | 5  | 0.75 |
|             | Bagging | T-test  | 6  | 0.95 |
|             | LR      | T-test  | 5  | 0.95 |
|             | NB      | T-test  | 5  | 0.95 |
|             | KNN     | T-test  | 5  | 0.95 |
|             | SVM     | T-test  | 5  | 0.95 |
| HLA-B*27:07 | LR      | SVM_RFE | 9  | 0.75 |
|             | SVM     | T-test  | 5  | 0.75 |
|             | XGBoost | T-test  | 8  | 0.75 |
|             | Dtree   | T-test  | 6  | 0.75 |
|             | Bagging | T-test  | 6  | 0.75 |
|             | NB      | T-test  | 5  | 0.75 |
|             | KNN     | T-test  | 5  | 0.75 |
| HLA-B*27:08 | Dtree   | SVM_RFE | 7  | 0.95 |
|             | Bagging | T-test  | 13 | 0.95 |
|             | LR      | T-test  | 6  | 0.75 |
|             | KNN     | T-test  | 9  | 0.95 |
|             | XGBoost | T-test  | 10 | 0.55 |
|             | NB      | W-test  | 5  | 0.95 |
|             | SVM     | T-test  | 9  | 0.95 |
| HLA-B*27:09 | LR      | RF      | 16 | 0.75 |
|             | KNN     | W-test  | 18 | 0.55 |
|             | SVM     | T-test  | 16 | 0.55 |
|             | NB      | RF      | 15 | 0.95 |
|             | XGBoost | W-test  | 17 | 0.55 |
|             | Bagging | W-test  | 17 | 0.55 |
|             | Dtree   | W-test  | 15 | 0.55 |
| HLA-B*35:01 | NB      | LR_RFE  | 12 | 0.55 |
|             | SVM     | T-test  | 7  | 0.55 |
|             | LR      | T-test  | 17 | 0.75 |
|             | KNN     | RF      | 11 | 0.75 |
|             | XGBoost | T-test  | 10 | 0.75 |
|             | Bagging | W-test  | 6  | 0.95 |
|             | Dtree   | SVM_RFE | 7  | 0.75 |
| HLA-B*35:03 | XGBoost | T-test  | 11 | 0.75 |

|             |         |         |    |      |
|-------------|---------|---------|----|------|
|             | Dtree   | T-test  | 8  | 0.95 |
|             | Bagging | T-test  | 8  | 0.95 |
|             | NB      | T-test  | 7  | 0.75 |
|             | LR      | T-test  | 6  | 0.75 |
|             | SVM     | T-test  | 6  | 0.75 |
|             | KNN     | T-test  | 6  | 0.55 |
| HLA-B*35:08 | LR      | T-test  | 14 | 0.55 |
|             | NB      | T-test  | 14 | 0.55 |
|             | SVM     | T-test  | 14 | 0.55 |
|             | KNN     | T-test  | 13 | 0.75 |
|             | XGBoost | T-test  | 13 | 0.75 |
|             | Dtree   | T-test  | 11 | 0.95 |
|             | Bagging | T-test  | 11 | 0.95 |
| HLA-B*37:01 | Bagging | SVM_RFE | 9  | 0.55 |
|             | Dtree   | SVM_RFE | 9  | 0.55 |
|             | SVM     | T-test  | 15 | 0.75 |
|             | NB      | T-test  | 5  | 0.95 |
|             | KNN     | T-test  | 14 | 0.75 |
|             | LR      | T-test  | 13 | 0.55 |
|             | XGBoost | W-test  | 13 | 0.95 |
| HLA-B*39:01 | XGBoost | SVM_RFE | 12 | 0.95 |
|             | Bagging | RF      | 18 | 0.95 |
|             | Dtree   | T-test  | 12 | 0.95 |
|             | KNN     | T-test  | 15 | 0.95 |
|             | SVM     | T-test  | 11 | 0.75 |
|             | LR      | T-test  | 11 | 0.55 |
|             | NB      | T-test  | 11 | 0.55 |
| HLA-B*40:01 | XGBoost | SVM_RFE | 13 | 0.75 |
|             | KNN     | T-test  | 5  | 0.75 |
|             | Dtree   | RF      | 17 | 0.55 |
|             | Bagging | RF      | 10 | 0.75 |
|             | LR      | T-test  | 15 | 0.95 |
|             | SVM     | T-test  | 5  | 0.75 |
|             | NB      | T-test  | 12 | 0.75 |
| HLA-B*40:02 | SVM     | RF      | 10 | 0.55 |
|             | LR      | T-test  | 10 | 0.95 |
|             | KNN     | RF      | 5  | 0.75 |
|             | NB      | T-test  | 10 | 0.95 |
|             | XGBoost | T-test  | 8  | 0.95 |
|             | Bagging | LR_RFE  | 8  | 0.55 |
|             | Dtree   | T-test  | 10 | 0.55 |
| HLA-B*41:01 | SVM     | T-test  | 5  | 0.55 |
|             | KNN     | T-test  | 5  | 0.55 |
|             | LR      | T-test  | 5  | 0.55 |

|             |         |         |    |      |
|-------------|---------|---------|----|------|
|             | XGBoost | T-test  | 5  | 0.75 |
|             | Bagging | T-test  | 5  | 0.75 |
|             | Dtree   | T-test  | 5  | 0.75 |
|             | NB      | T-test  | 8  | 0.55 |
| HLA-B*44:02 | LR      | SVM_RFE | 17 | 0.55 |
|             | KNN     | SVM_RFE | 14 | 0.55 |
|             | Bagging | RF      | 11 | 0.55 |
|             | XGBoost | SVM_RFE | 17 | 0.75 |
|             | SVM     | T-test  | 7  | 0.55 |
|             | NB      | W-test  | 11 | 0.95 |
|             | Dtree   | W-test  | 12 | 0.55 |
| HLA-B*44:03 | KNN     | W-test  | 7  | 0.75 |
|             | LR      | T-test  | 17 | 0.75 |
|             | NB      | T-test  | 11 | 0.95 |
|             | XGBoost | W-test  | 9  | 0.95 |
|             | SVM     | T-test  | 12 | 0.55 |
|             | Bagging | T-test  | 9  | 0.75 |
|             | Dtree   | SVM_RFE | 8  | 0.55 |
| HLA-B*44:27 | XGBoost | T-test  | 6  | 0.75 |
|             | Dtree   | T-test  | 6  | 0.75 |
|             | SVM     | T-test  | 7  | 0.75 |
|             | KNN     | T-test  | 7  | 0.75 |
|             | NB      | T-test  | 7  | 0.75 |
|             | LR      | T-test  | 7  | 0.75 |
|             | Bagging | T-test  | 9  | 0.55 |
| HLA-B*45:01 | XGBoost | LR_RFE  | 14 | 0.55 |
|             | KNN     | W-test  | 12 | 0.55 |
|             | LR      | W-test  | 6  | 0.75 |
|             | SVM     | T-test  | 9  | 0.55 |
|             | NB      | W-test  | 11 | 0.75 |
|             | Bagging | T-test  | 8  | 0.55 |
|             | Dtree   | RF      | 5  | 0.75 |
| HLA-B*46:01 | LR      | SVM_RFE | 17 | 0.55 |
|             | Dtree   | SVM_RFE | 12 | 0.75 |
|             | Bagging | SVM_RFE | 12 | 0.55 |
|             | XGBoost | SVM_RFE | 12 | 0.55 |
|             | KNN     | W-test  | 14 | 0.55 |
|             | NB      | W-test  | 10 | 0.55 |
|             | SVM     | T-test  | 10 | 0.75 |
| HLA-B*49:01 | Dtree   | SVM_RFE | 10 | 0.75 |
|             | LR      | T-test  | 11 | 0.75 |
|             | XGBoost | T-test  | 10 | 0.95 |
|             | NB      | T-test  | 8  | 0.75 |
|             | KNN     | T-test  | 7  | 0.95 |

|             |         |         |    |      |
|-------------|---------|---------|----|------|
|             | SVM     | T-test  | 6  | 0.75 |
|             | Bagging | T-test  | 5  | 0.95 |
| HLA-B*50:01 | Dtree   | RF      | 8  | 0.95 |
|             | XGBoost | T-test  | 13 | 0.75 |
|             | Bagging | T-test  | 9  | 0.95 |
|             | SVM     | T-test  | 5  | 0.75 |
|             | KNN     | T-test  | 5  | 0.75 |
|             | NB      | T-test  | 5  | 0.95 |
|             | LR      | T-test  | 5  | 0.75 |
| HLA-B*51:01 | NB      | SVM_RFE | 12 | 0.55 |
|             | LR      | RF      | 14 | 0.55 |
|             | Bagging | RF      | 12 | 0.75 |
|             | KNN     | RF      | 5  | 0.75 |
|             | SVM     | T-test  | 11 | 0.95 |
|             | XGBoost | T-test  | 5  | 0.95 |
|             | Dtree   | T-test  | 10 | 0.75 |
| HLA-B*53:01 | NB      | T-test  | 11 | 0.55 |
|             | Bagging | T-test  | 5  | 0.75 |
|             | Dtree   | T-test  | 8  | 0.75 |
|             | LR      | T-test  | 8  | 0.55 |
|             | SVM     | T-test  | 7  | 0.75 |
|             | KNN     | T-test  | 7  | 0.55 |
|             | XGBoost | T-test  | 5  | 0.75 |
| HLA-B*54:01 | KNN     | W-test  | 12 | 0.95 |
|             | NB      | LR_RFE  | 9  | 0.75 |
|             | LR      | SVM_RFE | 9  | 0.95 |
|             | XGBoost | W-test  | 9  | 0.55 |
|             | SVM     | T-test  | 12 | 0.75 |
|             | Dtree   | LR_RFE  | 17 | 0.55 |
|             | Bagging | LR_RFE  | 17 | 0.75 |
| HLA-B*56:01 | Dtree   | SVM_RFE | 9  | 0.75 |
|             | SVM     | RF      | 9  | 0.75 |
|             | KNN     | T-test  | 16 | 0.95 |
|             | NB      | T-test  | 11 | 0.95 |
|             | LR      | T-test  | 10 | 0.75 |
|             | Bagging | T-test  | 10 | 0.75 |
|             | XGBoost | T-test  | 10 | 0.75 |
| HLA-B*57:01 | SVM     | SVM_RFE | 9  | 0.75 |
|             | NB      | W-test  | 9  | 0.95 |
|             | KNN     | T-test  | 10 | 0.75 |
|             | XGBoost | RF      | 15 | 0.95 |
|             | LR      | T-test  | 11 | 0.95 |
|             | Bagging | T-test  | 13 | 0.55 |
|             | Dtree   | W-test  | 6  | 0.75 |

|             |         |         |    |      |
|-------------|---------|---------|----|------|
| HLA-B*57:03 | KNN     | W-test  | 10 | 0.55 |
|             | XGBoost | W-test  | 7  | 0.75 |
|             | LR      | T-test  | 10 | 0.95 |
|             | NB      | T-test  | 9  | 0.75 |
|             | SVM     | T-test  | 5  | 0.75 |
|             | Bagging | T-test  | 11 | 0.55 |
|             | Dtree   | W-test  | 7  | 0.75 |
| HLA-B*58:01 | KNN     | SVM_RFE | 7  | 0.75 |
|             | Bagging | T-test  | 5  | 0.95 |
|             | SVM     | T-test  | 5  | 0.75 |
|             | XGBoost | RF      | 7  | 0.75 |
|             | LR      | T-test  | 8  | 0.75 |
|             | NB      | SVM_RFE | 13 | 0.55 |
|             | Dtree   | T-test  | 5  | 0.95 |
| HLA-C*01:02 | XGBoost | W-test  | 7  | 0.55 |
|             | Dtree   | SVM_RFE | 15 | 0.75 |
|             | NB      | W-test  | 13 | 0.75 |
|             | SVM     | T-test  | 13 | 0.55 |
|             | LR      | T-test  | 13 | 0.95 |
|             | KNN     | RF      | 17 | 0.95 |
|             | Bagging | T-test  | 7  | 0.95 |
| HLA-C*02:02 | LR      | W-test  | 5  | 0.95 |
|             | KNN     | W-test  | 5  | 0.95 |
|             | SVM     | W-test  | 5  | 0.95 |
|             | NB      | T-test  | 13 | 0.75 |
|             | Bagging | T-test  | 6  | 0.95 |
|             | XGBoost | T-test  | 6  | 0.75 |
|             | Dtree   | T-test  | 7  | 0.75 |
| HLA-C*03:03 | NB      | T-test  | 11 | 0.75 |
|             | Bagging | W-test  | 10 | 0.55 |
|             | Dtree   | SVM_RFE | 16 | 0.95 |
|             | KNN     | T-test  | 11 | 0.55 |
|             | SVM     | T-test  | 5  | 0.95 |
|             | XGBoost | W-test  | 5  | 0.75 |
|             | LR      | W-test  | 5  | 0.95 |
| HLA-C*03:04 | NB      | T-test  | 17 | 0.95 |
|             | Dtree   | T-test  | 12 | 0.75 |
|             | Bagging | T-test  | 12 | 0.75 |
|             | XGBoost | T-test  | 12 | 0.75 |
|             | LR      | T-test  | 6  | 0.95 |
|             | KNN     | T-test  | 6  | 0.95 |
|             | SVM     | T-test  | 6  | 0.95 |
| HLA-C*04:01 | Bagging | SVM_RFE | 16 | 0.55 |
|             | KNN     | W-test  | 18 | 0.95 |

|             |         |         |    |      |
|-------------|---------|---------|----|------|
|             | NB      | T-test  | 16 | 0.75 |
|             | SVM     | W-test  | 17 | 0.55 |
|             | LR      | SVM_RFE | 18 | 0.55 |
|             | XGBoost | T-test  | 15 | 0.95 |
|             | Dtree   | SVM_RFE | 15 | 0.55 |
| HLA-C*05:01 | NB      | SVM_RFE | 13 | 0.95 |
|             | SVM     | RF      | 12 | 0.95 |
|             | LR      | SVM_RFE | 9  | 0.95 |
|             | KNN     | T-test  | 11 | 0.55 |
|             | XGBoost | SVM_RFE | 7  | 0.95 |
|             | Bagging | SVM_RFE | 9  | 0.75 |
|             | Dtree   | SVM_RFE | 10 | 0.55 |
| HLA-C*06:02 | XGBoost | W-test  | 8  | 0.75 |
|             | KNN     | T-test  | 8  | 0.55 |
|             | LR      | T-test  | 6  | 0.95 |
|             | Dtree   | T-test  | 7  | 0.95 |
|             | Bagging | T-test  | 7  | 0.75 |
|             | NB      | T-test  | 9  | 0.95 |
|             | SVM     | T-test  | 11 | 0.95 |
| HLA-C*07:01 | Dtree   | LR_RFE  | 11 | 0.55 |
|             | XGBoost | LR_RFE  | 7  | 0.55 |
|             | Bagging | LR_RFE  | 6  | 0.75 |
|             | LR      | RF      | 14 | 0.75 |
|             | NB      | W-test  | 6  | 0.95 |
|             | SVM     | T-test  | 8  | 0.55 |
|             | KNN     | T-test  | 7  | 0.95 |
| HLA-C*07:02 | Dtree   | W-test  | 10 | 0.55 |
|             | Bagging | W-test  | 10 | 0.55 |
|             | XGBoost | W-test  | 10 | 0.55 |
|             | KNN     | W-test  | 17 | 0.95 |
|             | NB      | T-test  | 17 | 0.55 |
|             | LR      | T-test  | 15 | 0.75 |
|             | SVM     | T-test  | 15 | 0.55 |
| HLA-C*07:04 | NB      | T-test  | 5  | 0.55 |
|             | XGBoost | RF      | 7  | 0.95 |
|             | Bagging | RF      | 7  | 0.95 |
|             | Dtree   | RF      | 7  | 0.95 |
|             | SVM     | T-test  | 5  | 0.55 |
|             | KNN     | T-test  | 5  | 0.55 |
|             | LR      | T-test  | 5  | 0.95 |
| HLA-C*08:02 | Dtree   | W-test  | 7  | 0.55 |
|             | LR      | LR_RFE  | 9  | 0.95 |
|             | KNN     | RF      | 9  | 0.55 |
|             | XGBoost | T-test  | 12 | 0.95 |

|    |             |         |         |    |      |
|----|-------------|---------|---------|----|------|
|    |             | Bagging | T-test  | 12 | 0.55 |
|    |             | SVM     | T-test  | 6  | 0.55 |
|    |             | NB      | T-test  | 5  | 0.75 |
|    | HLA-C*14:02 | LR      | W-test  | 10 | 0.75 |
|    |             | KNN     | W-test  | 10 | 0.55 |
|    |             | SVM     | W-test  | 10 | 0.55 |
|    |             | Bagging | T-test  | 8  | 0.95 |
|    |             | XGBoost | T-test  | 8  | 0.95 |
|    |             | Dtree   | T-test  | 8  | 0.75 |
|    |             | NB      | T-test  | 7  | 0.95 |
|    | HLA-C*16:01 | NB      | SVM_RFE | 10 | 0.55 |
|    |             | XGBoost | T-test  | 15 | 0.95 |
|    |             | Bagging | T-test  | 11 | 0.95 |
|    |             | Dtree   | T-test  | 10 | 0.75 |
|    |             | LR      | T-test  | 8  | 0.55 |
|    |             | SVM     | T-test  | 7  | 0.75 |
|    |             | KNN     | T-test  | 6  | 0.95 |
| 11 | HLA-A*01:01 | XGBoost | W-test  | 9  | 0.75 |
|    |             | SVM     | T-test  | 6  | 0.75 |
|    |             | NB      | SVM_RFE | 8  | 0.75 |
|    |             | KNN     | T-test  | 7  | 0.75 |
|    |             | LR      | T-test  | 7  | 0.75 |
|    |             | Bagging | SVM_RFE | 7  | 0.75 |
|    |             | Dtree   | T-test  | 5  | 0.95 |
|    | HLA-A*02:01 | XGBoost | SVM_RFE | 15 | 0.75 |
|    |             | LR      | RF      | 16 | 0.95 |
|    |             | SVM     | RF      | 7  | 0.55 |
|    |             | Bagging | RF      | 16 | 0.95 |
|    |             | NB      | RF      | 14 | 0.95 |
|    |             | KNN     | RF      | 5  | 0.75 |
|    |             | Dtree   | W-test  | 5  | 0.75 |
|    | HLA-A*02:03 | XGBoost | RF      | 12 | 0.75 |
|    |             | Dtree   | W-test  | 7  | 0.75 |
|    |             | NB      | T-test  | 10 | 0.75 |
|    |             | LR      | T-test  | 10 | 0.55 |
|    |             | KNN     | T-test  | 10 | 0.55 |
|    |             | SVM     | T-test  | 8  | 0.95 |
|    |             | Bagging | T-test  | 6  | 0.55 |
|    | HLA-A*02:04 | Dtree   | T-test  | 8  | 0.55 |
|    |             | Bagging | T-test  | 8  | 0.55 |
|    |             | XGBoost | T-test  | 7  | 0.95 |
|    |             | LR      | T-test  | 6  | 0.55 |
|    |             | NB      | T-test  | 6  | 0.55 |
|    |             | KNN     | T-test  | 6  | 0.55 |

|             |         |         |    |      |
|-------------|---------|---------|----|------|
|             | SVM     | T-test  | 6  | 0.55 |
| HLA-A*02:05 | LR      | T-test  | 5  | 0.75 |
|             | SVM     | T-test  | 5  | 0.75 |
|             | Bagging | T-test  | 8  | 0.55 |
|             | KNN     | T-test  | 8  | 0.55 |
|             | XGBoost | T-test  | 8  | 0.55 |
|             | NB      | T-test  | 5  | 0.75 |
|             | Dtree   | T-test  | 8  | 0.75 |
| HLA-A*02:07 | NB      | LR_RFE  | 13 | 0.75 |
|             | Dtree   | RF      | 18 | 0.75 |
|             | SVM     | RF      | 13 | 0.55 |
|             | Bagging | T-test  | 12 | 0.75 |
|             | XGBoost | T-test  | 12 | 0.75 |
|             | KNN     | T-test  | 10 | 0.95 |
|             | LR      | T-test  | 7  | 0.75 |
| HLA-A*03:01 | KNN     | LR_RFE  | 18 | 0.95 |
|             | Dtree   | SVM_RFE | 6  | 0.75 |
|             | XGBoost | T-test  | 12 | 0.55 |
|             | NB      | T-test  | 5  | 0.75 |
|             | Bagging | LR_RFE  | 9  | 0.75 |
|             | LR      | T-test  | 11 | 0.75 |
|             | SVM     | T-test  | 5  | 0.55 |
| HLA-A*11:01 | NB      | W-test  | 16 | 0.55 |
|             | Bagging | T-test  | 6  | 0.75 |
|             | LR      | T-test  | 13 | 0.55 |
|             | Dtree   | T-test  | 6  | 0.75 |
|             | KNN     | T-test  | 12 | 0.75 |
|             | XGBoost | T-test  | 5  | 0.95 |
|             | SVM     | T-test  | 5  | 0.75 |
| HLA-A*23:01 | NB      | LR_RFE  | 7  | 0.55 |
|             | Dtree   | RF      | 6  | 0.55 |
|             | Bagging | RF      | 6  | 0.55 |
|             | XGBoost | T-test  | 5  | 0.95 |
|             | LR      | T-test  | 6  | 0.55 |
|             | KNN     | T-test  | 6  | 0.55 |
|             | SVM     | T-test  | 6  | 0.55 |
| HLA-A*24:02 | Bagging | W-test  | 10 | 0.55 |
|             | KNN     | W-test  | 10 | 0.75 |
|             | XGBoost | W-test  | 9  | 0.55 |
|             | LR      | T-test  | 11 | 0.75 |
|             | NB      | T-test  | 7  | 0.95 |
|             | SVM     | T-test  | 7  | 0.75 |
|             | Dtree   | T-test  | 8  | 0.95 |
| HLA-A*24:06 | Dtree   | T-test  | 8  | 0.95 |



|             |         |         |    |      |
|-------------|---------|---------|----|------|
|             | SVM     | T-test  | 5  | 0.95 |
|             | LR      | T-test  | 5  | 0.95 |
|             | Bagging | T-test  | 5  | 0.95 |
|             | NB      | T-test  | 5  | 0.95 |
|             | KNN     | T-test  | 5  | 0.95 |
|             | XGBoost | T-test  | 5  | 0.95 |
| HLA-A*29:02 | Dtree   | LR_RFE  | 5  | 0.95 |
|             | KNN     | RF      | 8  | 0.55 |
|             | LR      | RF      | 7  | 0.75 |
|             | SVM     | W-test  | 10 | 0.55 |
|             | NB      | T-test  | 13 | 0.95 |
|             | XGBoost | T-test  | 11 | 0.75 |
|             | Bagging | T-test  | 9  | 0.55 |
| HLA-A*31:01 | NB      | RF      | 6  | 0.75 |
|             | KNN     | W-test  | 17 | 0.75 |
|             | Dtree   | T-test  | 15 | 0.95 |
|             | Bagging | T-test  | 15 | 0.95 |
|             | XGBoost | T-test  | 15 | 0.95 |
|             | SVM     | T-test  | 14 | 0.55 |
|             | LR      | T-test  | 9  | 0.95 |
| HLA-A*32:01 | XGBoost | RF      | 5  | 0.75 |
|             | Bagging | RF      | 5  | 0.75 |
|             | SVM     | W-test  | 8  | 0.75 |
|             | Dtree   | T-test  | 18 | 0.95 |
|             | KNN     | T-test  | 15 | 0.95 |
|             | LR      | T-test  | 6  | 0.55 |
|             | NB      | T-test  | 9  | 0.55 |
| HLA-A*68:01 | Dtree   | SVM_RFE | 11 | 0.75 |
|             | XGBoost | SVM_RFE | 11 | 0.95 |
|             | NB      | T-test  | 10 | 0.95 |
|             | LR      | T-test  | 6  | 0.95 |
|             | Bagging | T-test  | 6  | 0.55 |
|             | KNN     | T-test  | 6  | 0.55 |
|             | SVM     | T-test  | 6  | 0.55 |
| HLA-A*68:02 | KNN     | T-test  | 17 | 0.75 |
|             | Bagging | T-test  | 8  | 0.95 |
|             | XGBoost | T-test  | 6  | 0.75 |
|             | Dtree   | RF      | 9  | 0.95 |
|             | NB      | T-test  | 7  | 0.95 |
|             | LR      | T-test  | 6  | 0.95 |
|             | SVM     | T-test  | 6  | 0.95 |
| HLA-B*07:02 | LR      | SVM_RFE | 18 | 0.95 |
|             | NB      | SVM_RFE | 17 | 0.95 |
|             | KNN     | SVM_RFE | 15 | 0.55 |

|             |         |         |    |      |
|-------------|---------|---------|----|------|
|             | SVM     | RF      | 17 | 0.95 |
|             | Bagging | SVM_RFE | 17 | 0.75 |
|             | XGBoost | SVM_RFE | 15 | 0.95 |
|             | Dtree   | SVM_RFE | 6  | 0.55 |
| HLA-B*08:01 | Dtree   | T-test  | 5  | 0.55 |
|             | XGBoost | T-test  | 11 | 0.75 |
|             | Bagging | T-test  | 11 | 0.75 |
|             | SVM     | T-test  | 12 | 0.55 |
|             | KNN     | T-test  | 12 | 0.75 |
|             | LR      | W-test  | 6  | 0.95 |
|             | NB      | W-test  | 7  | 0.55 |
| HLA-B*15:01 | SVM     | T-test  | 17 | 0.75 |
|             | NB      | SVM_RFE | 15 | 0.75 |
|             | LR      | RF      | 13 | 0.75 |
|             | Bagging | RF      | 12 | 0.55 |
|             | KNN     | RF      | 12 | 0.55 |
|             | XGBoost | W-test  | 14 | 0.75 |
|             | Dtree   | T-test  | 14 | 0.75 |
| HLA-B*27:01 | Dtree   | SVM_RFE | 14 | 0.95 |
|             | NB      | W-test  | 17 | 0.95 |
|             | Bagging | T-test  | 11 | 0.95 |
|             | XGBoost | T-test  | 11 | 0.95 |
|             | SVM     | T-test  | 10 | 0.75 |
|             | LR      | T-test  | 10 | 0.55 |
|             | KNN     | T-test  | 9  | 0.75 |
| HLA-B*27:02 | Bagging | T-test  | 5  | 0.95 |
|             | KNN     | LR_RFE  | 12 | 0.55 |
|             | Dtree   | W-test  | 11 | 0.55 |
|             | LR      | T-test  | 12 | 0.75 |
|             | NB      | T-test  | 8  | 0.55 |
|             | SVM     | T-test  | 8  | 0.55 |
|             | XGBoost | T-test  | 6  | 0.55 |
| HLA-B*27:03 | SVM     | T-test  | 5  | 0.75 |
|             | KNN     | T-test  | 5  | 0.75 |
|             | LR      | T-test  | 5  | 0.75 |
|             | XGBoost | T-test  | 6  | 0.95 |
|             | NB      | T-test  | 6  | 0.95 |
|             | Bagging | T-test  | 6  | 0.95 |
|             | Dtree   | T-test  | 6  | 0.95 |
| HLA-B*27:04 | Dtree   | T-test  | 8  | 0.55 |
|             | LR      | T-test  | 6  | 0.55 |
|             | Bagging | T-test  | 5  | 0.95 |
|             | NB      | T-test  | 5  | 0.95 |
|             | SVM     | T-test  | 5  | 0.75 |

|             |         |         |    |      |
|-------------|---------|---------|----|------|
|             | XGBoost | T-test  | 5  | 0.75 |
|             | KNN     | T-test  | 5  | 0.75 |
| HLA-B*27:05 | NB      | LR_RFE  | 18 | 0.75 |
|             | SVM     | W-test  | 15 | 0.55 |
|             | LR      | SVM_RFE | 5  | 0.95 |
|             | KNN     | SVM_RFE | 14 | 0.95 |
|             | XGBoost | RF      | 10 | 0.55 |
|             | Bagging | LR_RFE  | 5  | 0.95 |
|             | Dtree   | LR_RFE  | 15 | 0.95 |
| HLA-B*27:06 | SVM     | T-test  | 5  | 0.55 |
|             | KNN     | T-test  | 5  | 0.55 |
|             | NB      | T-test  | 5  | 0.55 |
|             | Bagging | T-test  | 5  | 0.55 |
|             | LR      | T-test  | 5  | 0.55 |
|             | Dtree   | T-test  | 5  | 0.55 |
|             | XGBoost | T-test  | 7  | 0.55 |
| HLA-B*27:07 | Bagging | RF      | 10 | 0.95 |
|             | Dtree   | RF      | 10 | 0.95 |
|             | LR      | T-test  | 6  | 0.55 |
|             | XGBoost | T-test  | 15 | 0.75 |
|             | KNN     | T-test  | 8  | 0.75 |
|             | NB      | T-test  | 6  | 0.95 |
|             | SVM     | T-test  | 6  | 0.75 |
| HLA-B*27:08 | Dtree   | W-test  | 11 | 0.55 |
|             | Bagging | T-test  | 6  | 0.55 |
|             | XGBoost | T-test  | 6  | 0.55 |
|             | SVM     | W-test  | 10 | 0.55 |
|             | LR      | T-test  | 13 | 0.55 |
|             | NB      | T-test  | 12 | 0.95 |
|             | KNN     | T-test  | 5  | 0.75 |
| HLA-B*27:09 | Bagging | LR_RFE  | 6  | 0.95 |
|             | XGBoost | SVM_RFE | 10 | 0.75 |
|             | LR      | SVM_RFE | 17 | 0.95 |
|             | SVM     | W-test  | 18 | 0.95 |
|             | Dtree   | LR_RFE  | 13 | 0.55 |
|             | NB      | T-test  | 10 | 0.95 |
|             | KNN     | T-test  | 9  | 0.55 |
| HLA-B*35:01 | KNN     | SVM_RFE | 16 | 0.75 |
|             | XGBoost | W-test  | 6  | 0.75 |
|             | Bagging | SVM_RFE | 8  | 0.75 |
|             | Dtree   | SVM_RFE | 6  | 0.95 |
|             | LR      | T-test  | 11 | 0.75 |
|             | NB      | T-test  | 14 | 0.55 |
|             | SVM     | T-test  | 15 | 0.55 |

|             |         |         |    |      |
|-------------|---------|---------|----|------|
| HLA-B*35:03 | XGBoost | SVM_RFE | 10 | 0.75 |
|             | Dtree   | W-test  | 14 | 0.55 |
|             | Bagging | T-test  | 16 | 0.75 |
|             | LR      | T-test  | 6  | 0.55 |
|             | NB      | T-test  | 6  | 0.55 |
|             | SVM     | T-test  | 5  | 0.75 |
|             | KNN     | T-test  | 5  | 0.75 |
| HLA-B*35:08 | XGBoost | RF      | 9  | 0.55 |
|             | Bagging | RF      | 9  | 0.55 |
|             | Dtree   | RF      | 9  | 0.55 |
|             | SVM     | T-test  | 5  | 0.55 |
|             | KNN     | T-test  | 5  | 0.55 |
|             | NB      | T-test  | 5  | 0.55 |
|             | LR      | T-test  | 5  | 0.55 |
| HLA-B*37:01 | SVM     | T-test  | 5  | 0.55 |
|             | XGBoost | T-test  | 5  | 0.55 |
|             | KNN     | T-test  | 5  | 0.55 |
|             | NB      | T-test  | 5  | 0.55 |
|             | Bagging | T-test  | 5  | 0.55 |
|             | LR      | T-test  | 5  | 0.55 |
|             | Dtree   | T-test  | 5  | 0.55 |
| HLA-B*39:01 | KNN     | T-test  | 5  | 0.75 |
|             | SVM     | T-test  | 5  | 0.75 |
|             | Dtree   | T-test  | 5  | 0.95 |
|             | XGBoost | T-test  | 5  | 0.95 |
|             | LR      | T-test  | 5  | 0.75 |
|             | NB      | T-test  | 5  | 0.75 |
|             | Bagging | T-test  | 6  | 0.75 |
| HLA-B*40:01 | Dtree   | SVM_RFE | 7  | 0.95 |
|             | Bagging | SVM_RFE | 7  | 0.95 |
|             | SVM     | W-test  | 5  | 0.75 |
|             | LR      | T-test  | 11 | 0.75 |
|             | NB      | T-test  | 10 | 0.55 |
|             | KNN     | T-test  | 8  | 0.55 |
|             | XGBoost | T-test  | 5  | 0.75 |
| HLA-B*40:02 | Bagging | LR_RFE  | 10 | 0.95 |
|             | XGBoost | SVM_RFE | 11 | 0.95 |
|             | NB      | T-test  | 8  | 0.95 |
|             | Dtree   | SVM_RFE | 11 | 0.95 |
|             | LR      | T-test  | 11 | 0.95 |
|             | KNN     | T-test  | 17 | 0.75 |
|             | SVM     | T-test  | 5  | 0.95 |
| HLA-B*44:02 | LR      | RF      | 10 | 0.55 |
|             | Dtree   | T-test  | 9  | 0.75 |

|             |         |         |    |      |
|-------------|---------|---------|----|------|
|             | Bagging | T-test  | 9  | 0.75 |
|             | XGBoost | T-test  | 9  | 0.75 |
|             | NB      | T-test  | 8  | 0.95 |
|             | SVM     | T-test  | 5  | 0.95 |
|             | KNN     | T-test  | 5  | 0.95 |
| HLA-B*44:03 | Dtree   | LR_RFE  | 14 | 0.95 |
|             | Bagging | SVM_RFE | 13 | 0.95 |
|             | NB      | SVM_RFE | 7  | 0.95 |
|             | XGBoost | RF      | 14 | 0.95 |
|             | SVM     | W-test  | 6  | 0.75 |
|             | LR      | T-test  | 17 | 0.75 |
|             | KNN     | T-test  | 12 | 0.95 |
| HLA-B*45:01 | Dtree   | LR_RFE  | 11 | 0.55 |
|             | NB      | W-test  | 7  | 0.55 |
|             | XGBoost | LR_RFE  | 14 | 0.75 |
|             | LR      | SVM_RFE | 5  | 0.55 |
|             | SVM     | SVM_RFE | 5  | 0.55 |
|             | Bagging | T-test  | 13 | 0.55 |
|             | KNN     | T-test  | 13 | 0.55 |
| HLA-B*46:01 | NB      | T-test  | 5  | 0.75 |
|             | KNN     | SVM_RFE | 10 | 0.95 |
|             | LR      | T-test  | 5  | 0.75 |
|             | XGBoost | T-test  | 5  | 0.95 |
|             | Bagging | T-test  | 5  | 0.95 |
|             | Dtree   | T-test  | 5  | 0.95 |
|             | SVM     | T-test  | 8  | 0.55 |
| HLA-B*49:01 | SVM     | T-test  | 5  | 0.55 |
|             | XGBoost | T-test  | 5  | 0.55 |
|             | KNN     | T-test  | 5  | 0.55 |
|             | Bagging | T-test  | 5  | 0.55 |
|             | Dtree   | T-test  | 5  | 0.55 |
|             | NB      | T-test  | 5  | 0.75 |
|             | LR      | T-test  | 5  | 0.75 |
| HLA-B*51:01 | SVM     | RF      | 11 | 0.95 |
|             | NB      | RF      | 9  | 0.95 |
|             | LR      | T-test  | 14 | 0.55 |
|             | KNN     | T-test  | 8  | 0.55 |
|             | Dtree   | RF      | 6  | 0.95 |
|             | Bagging | T-test  | 14 | 0.75 |
|             | XGBoost | T-test  | 6  | 0.75 |
| HLA-B*54:01 | SVM     | RF      | 17 | 0.95 |
|             | NB      | RF      | 10 | 0.95 |
|             | KNN     | RF      | 10 | 0.95 |
|             | Dtree   | RF      | 6  | 0.95 |

|             |         |         |    |      |
|-------------|---------|---------|----|------|
|             | LR      | T-test  | 9  | 0.75 |
|             | Bagging | T-test  | 9  | 0.55 |
|             | XGBoost | T-test  | 9  | 0.55 |
| HLA-B*56:01 | XGBoost | T-test  | 8  | 0.55 |
|             | KNN     | SVM_RFE | 9  | 0.55 |
|             | SVM     | T-test  | 5  | 0.55 |
|             | NB      | SVM_RFE | 5  | 0.75 |
|             | Dtree   | T-test  | 8  | 0.55 |
|             | Bagging | T-test  | 8  | 0.55 |
|             | LR      | SVM_RFE | 9  | 0.55 |
| HLA-B*57:01 | LR      | RF      | 11 | 0.95 |
|             | KNN     | T-test  | 13 | 0.75 |
|             | SVM     | RF      | 16 | 0.75 |
|             | NB      | T-test  | 12 | 0.75 |
|             | Bagging | LR_RFE  | 16 | 0.95 |
|             | XGBoost | RF      | 12 | 0.55 |
|             | Dtree   | SVM_RFE | 11 | 0.55 |
| HLA-B*57:03 | NB      | W-test  | 13 | 0.75 |
|             | LR      | W-test  | 12 | 0.55 |
|             | XGBoost | T-test  | 14 | 0.75 |
|             | Dtree   | W-test  | 13 | 0.95 |
|             | KNN     | T-test  | 5  | 0.75 |
|             | SVM     | T-test  | 12 | 0.55 |
|             | Bagging | T-test  | 12 | 0.75 |
| HLA-B*58:01 | KNN     | LR_RFE  | 7  | 0.95 |
|             | Bagging | T-test  | 6  | 0.95 |
|             | XGBoost | T-test  | 6  | 0.95 |
|             | SVM     | T-test  | 6  | 0.75 |
|             | NB      | T-test  | 6  | 0.95 |
|             | LR      | T-test  | 6  | 0.95 |
|             | Dtree   | T-test  | 7  | 0.55 |
| HLA-C*01:02 | Bagging | T-test  | 5  | 0.95 |
|             | LR      | T-test  | 5  | 0.95 |
|             | NB      | T-test  | 5  | 0.95 |
|             | XGBoost | T-test  | 5  | 0.95 |
|             | Dtree   | T-test  | 5  | 0.75 |
|             | SVM     | T-test  | 5  | 0.75 |
|             | KNN     | T-test  | 5  | 0.75 |
| HLA-C*02:02 | XGBoost | T-test  | 5  | 0.75 |
|             | KNN     | T-test  | 5  | 0.75 |
|             | Bagging | T-test  | 5  | 0.75 |
|             | LR      | T-test  | 5  | 0.75 |
|             | Dtree   | T-test  | 5  | 0.75 |
|             | SVM     | T-test  | 5  | 0.95 |

|             |         |         |    |      |
|-------------|---------|---------|----|------|
|             | NB      | T-test  | 5  | 0.95 |
| HLA-C*03:03 | KNN     | SVM_RFE | 12 | 0.55 |
|             | NB      | W-test  | 5  | 0.55 |
|             | XGBoost | T-test  | 10 | 0.55 |
|             | Dtree   | T-test  | 8  | 0.55 |
|             | Bagging | T-test  | 7  | 0.75 |
|             | SVM     | T-test  | 6  | 0.75 |
|             | LR      | T-test  | 6  | 0.75 |
| HLA-C*03:04 | XGBoost | T-test  | 13 | 0.55 |
|             | KNN     | W-test  | 5  | 0.55 |
|             | Bagging | W-test  | 5  | 0.55 |
|             | Dtree   | W-test  | 5  | 0.55 |
|             | SVM     | T-test  | 5  | 0.55 |
|             | NB      | T-test  | 5  | 0.55 |
|             | LR      | T-test  | 5  | 0.95 |
| HLA-C*04:01 | KNN     | SVM_RFE | 17 | 0.75 |
|             | XGBoost | T-test  | 8  | 0.95 |
|             | NB      | SVM_RFE | 13 | 0.75 |
|             | Dtree   | SVM_RFE | 9  | 0.95 |
|             | Bagging | SVM_RFE | 9  | 0.75 |
|             | SVM     | RF      | 11 | 0.95 |
|             | LR      | T-test  | 6  | 0.75 |
| HLA-C*05:01 | Dtree   | SVM_RFE | 7  | 0.55 |
|             | Bagging | RF      | 7  | 0.95 |
|             | NB      | T-test  | 10 | 0.75 |
|             | XGBoost | T-test  | 7  | 0.75 |
|             | LR      | T-test  | 6  | 0.95 |
|             | SVM     | T-test  | 6  | 0.95 |
|             | KNN     | T-test  | 5  | 0.95 |
| HLA-C*06:02 | XGBoost | SVM_RFE | 13 | 0.75 |
|             | Dtree   | W-test  | 7  | 0.95 |
|             | Bagging | T-test  | 13 | 0.55 |
|             | KNN     | W-test  | 12 | 0.75 |
|             | NB      | T-test  | 12 | 0.95 |
|             | SVM     | T-test  | 12 | 0.95 |
|             | LR      | T-test  | 10 | 0.55 |
| HLA-C*07:01 | NB      | RF      | 16 | 0.55 |
|             | Dtree   | RF      | 12 | 0.75 |
|             | KNN     | W-test  | 5  | 0.55 |
|             | SVM     | W-test  | 5  | 0.55 |
|             | Bagging | T-test  | 14 | 0.95 |
|             | XGBoost | T-test  | 14 | 0.95 |
|             | LR      | T-test  | 14 | 0.55 |
| HLA-C*07:02 | LR      | RF      | 5  | 0.75 |

|    |             |         |         |    |      |
|----|-------------|---------|---------|----|------|
|    |             | SVM     | W-test  | 14 | 0.55 |
|    |             | XGBoost | T-test  | 18 | 0.95 |
|    |             | NB      | T-test  | 14 | 0.75 |
|    |             | Dtree   | T-test  | 8  | 0.95 |
|    |             | Bagging | T-test  | 5  | 0.75 |
|    |             | KNN     | T-test  | 5  | 0.55 |
|    | HLA-C*08:02 | Bagging | SVM_RFE | 5  | 0.95 |
|    |             | Dtree   | RF      | 15 | 0.75 |
|    |             | SVM     | W-test  | 5  | 0.75 |
|    |             | XGBoost | RF      | 15 | 0.75 |
|    |             | LR      | W-test  | 5  | 0.75 |
|    |             | NB      | T-test  | 5  | 0.75 |
|    |             | KNN     | T-test  | 5  | 0.55 |
|    | HLA-C*16:01 | Dtree   | T-test  | 7  | 0.55 |
|    |             | LR      | T-test  | 7  | 0.55 |
|    |             | Bagging | T-test  | 7  | 0.55 |
|    |             | NB      | T-test  | 7  | 0.55 |
|    |             | KNN     | T-test  | 7  | 0.55 |
|    |             | XGBoost | T-test  | 7  | 0.55 |
|    |             | SVM     | T-test  | 7  | 0.55 |
| 12 | HLA-A*01:01 | XGBoost | SVM_RFE | 15 | 0.95 |
|    |             | NB      | W-test  | 12 | 0.55 |
|    |             | Bagging | SVM_RFE | 18 | 0.95 |
|    |             | Dtree   | T-test  | 14 | 0.75 |
|    |             | KNN     | T-test  | 10 | 0.95 |
|    |             | SVM     | LR_RFE  | 6  | 0.75 |
|    |             | LR      | T-test  | 5  | 0.95 |
|    | HLA-A*02:01 | KNN     | RF      | 10 | 0.75 |
|    |             | SVM     | W-test  | 18 | 0.95 |
|    |             | LR      | W-test  | 14 | 0.75 |
|    |             | NB      | T-test  | 17 | 0.95 |
|    |             | XGBoost | T-test  | 11 | 0.95 |
|    |             | Bagging | T-test  | 11 | 0.95 |
|    |             | Dtree   | LR_RFE  | 7  | 0.55 |
|    | HLA-A*03:01 | Bagging | W-test  | 9  | 0.75 |
|    |             | NB      | T-test  | 8  | 0.95 |
|    |             | KNN     | T-test  | 7  | 0.75 |
|    |             | XGBoost | T-test  | 8  | 0.55 |
|    |             | LR      | T-test  | 6  | 0.95 |
|    |             | SVM     | T-test  | 6  | 0.75 |
|    |             | Dtree   | W-test  | 6  | 0.55 |
|    | HLA-A*11:01 | LR      | LR_RFE  | 5  | 0.55 |
|    |             | Dtree   | W-test  | 6  | 0.55 |
|    |             | XGBoost | W-test  | 6  | 0.55 |



|             |         |        |    |      |
|-------------|---------|--------|----|------|
|             | NB      | W-test | 6  | 0.75 |
|             | KNN     | T-test | 5  | 0.75 |
|             | Bagging | T-test | 5  | 0.75 |
|             | SVM     | T-test | 6  | 0.75 |
| HLA-A*24:02 | Bagging | T-test | 11 | 0.75 |
|             | XGBoost | T-test | 11 | 0.75 |
|             | Dtree   | T-test | 11 | 0.55 |
|             | NB      | T-test | 7  | 0.75 |
|             | SVM     | T-test | 5  | 0.75 |
|             | LR      | T-test | 6  | 0.75 |
|             | KNN     | T-test | 5  | 0.75 |
| HLA-A*29:02 | NB      | T-test | 6  | 0.75 |
|             | LR      | T-test | 6  | 0.75 |
|             | SVM     | T-test | 8  | 0.55 |
|             | KNN     | T-test | 8  | 0.55 |
|             | Bagging | T-test | 9  | 0.95 |
|             | XGBoost | T-test | 10 | 0.75 |
|             | Dtree   | T-test | 11 | 0.75 |
| HLA-A*31:01 | Dtree   | RF     | 9  | 0.75 |
|             | XGBoost | W-test | 13 | 0.75 |
|             | Bagging | W-test | 13 | 0.75 |
|             | SVM     | T-test | 5  | 0.55 |
|             | KNN     | T-test | 5  | 0.55 |
|             | NB      | T-test | 5  | 0.75 |
|             | LR      | T-test | 5  | 0.75 |
| HLA-A*68:01 | SVM     | T-test | 5  | 0.55 |
|             | KNN     | T-test | 5  | 0.55 |
|             | NB      | T-test | 5  | 0.55 |
|             | LR      | T-test | 5  | 0.55 |
|             | Dtree   | T-test | 5  | 0.55 |
|             | Bagging | T-test | 5  | 0.75 |
|             | XGBoost | T-test | 7  | 0.55 |
| HLA-A*68:02 | LR      | W-test | 17 | 0.75 |
|             | XGBoost | W-test | 12 | 0.75 |
|             | Dtree   | W-test | 8  | 0.75 |
|             | Bagging | W-test | 8  | 0.75 |
|             | NB      | T-test | 10 | 0.95 |
|             | SVM     | T-test | 5  | 0.75 |
|             | KNN     | T-test | 10 | 0.95 |
| HLA-B*07:02 | LR      | T-test | 7  | 0.95 |
|             | SVM     | T-test | 6  | 0.55 |
|             | KNN     | T-test | 6  | 0.55 |
|             | XGBoost | T-test | 7  | 0.55 |
|             | Bagging | T-test | 13 | 0.95 |

|             |         |         |    |      |
|-------------|---------|---------|----|------|
|             | NB      | T-test  | 13 | 0.95 |
|             | Dtree   | W-test  | 16 | 0.75 |
| HLA-B*08:01 | XGBoost | W-test  | 15 | 0.95 |
|             | Dtree   | T-test  | 13 | 0.95 |
|             | Bagging | T-test  | 13 | 0.95 |
|             | KNN     | T-test  | 13 | 0.75 |
|             | SVM     | T-test  | 13 | 0.75 |
|             | LR      | T-test  | 13 | 0.55 |
|             | NB      | T-test  | 11 | 0.95 |
| HLA-B*15:01 | XGBoost | LR_RFE  | 5  | 0.95 |
|             | Dtree   | SVM_RFE | 6  | 0.75 |
|             | Bagging | W-test  | 8  | 0.95 |
|             | SVM     | T-test  | 5  | 0.75 |
|             | KNN     | T-test  | 5  | 0.75 |
|             | LR      | T-test  | 6  | 0.75 |
|             | NB      | T-test  | 6  | 0.75 |
| HLA-B*27:01 | KNN     | T-test  | 5  | 0.75 |
|             | SVM     | T-test  | 5  | 0.75 |
|             | Bagging | T-test  | 6  | 0.95 |
|             | XGBoost | T-test  | 6  | 0.95 |
|             | NB      | T-test  | 5  | 0.95 |
|             | LR      | T-test  | 5  | 0.75 |
|             | Dtree   | T-test  | 6  | 0.95 |
| HLA-B*27:02 | Dtree   | W-test  | 6  | 0.55 |
|             | KNN     | W-test  | 6  | 0.55 |
|             | NB      | T-test  | 10 | 0.75 |
|             | XGBoost | T-test  | 10 | 0.75 |
|             | LR      | T-test  | 8  | 0.75 |
|             | Bagging | T-test  | 8  | 0.55 |
|             | SVM     | T-test  | 8  | 0.55 |
| HLA-B*27:03 | SVM     | T-test  | 5  | 0.55 |
|             | KNN     | T-test  | 5  | 0.55 |
|             | NB      | T-test  | 5  | 0.55 |
|             | LR      | T-test  | 5  | 0.55 |
|             | XGBoost | T-test  | 6  | 0.55 |
|             | Bagging | T-test  | 6  | 0.55 |
|             | Dtree   | T-test  | 6  | 0.55 |
| HLA-B*27:05 | SVM     | SVM_RFE | 13 | 0.55 |
|             | NB      | LR_RFE  | 11 | 0.75 |
|             | KNN     | W-test  | 12 | 0.75 |
|             | LR      | SVM_RFE | 10 | 0.75 |
|             | XGBoost | SVM_RFE | 14 | 0.95 |
|             | Bagging | LR_RFE  | 12 | 0.75 |
|             | Dtree   | SVM_RFE | 9  | 0.55 |

|             |         |        |    |      |
|-------------|---------|--------|----|------|
| HLA-B*27:07 | SVM     | T-test | 5  | 0.55 |
|             | XGBoost | T-test | 5  | 0.55 |
|             | KNN     | T-test | 5  | 0.55 |
|             | Bagging | T-test | 5  | 0.55 |
|             | Dtree   | T-test | 5  | 0.55 |
|             | LR      | T-test | 5  | 0.75 |
|             | NB      | T-test | 5  | 0.95 |
| HLA-B*27:08 | SVM     | T-test | 5  | 0.55 |
|             | LR      | T-test | 5  | 0.55 |
|             | KNN     | T-test | 5  | 0.75 |
|             | NB      | T-test | 5  | 0.75 |
|             | XGBoost | T-test | 6  | 0.95 |
|             | Dtree   | T-test | 6  | 0.95 |
|             | Bagging | T-test | 13 | 0.75 |
| HLA-B*27:09 | LR      | LR_RFE | 5  | 0.75 |
|             | NB      | RF     | 13 | 0.95 |
|             | SVM     | W-test | 11 | 0.75 |
|             | Bagging | T-test | 13 | 0.95 |
|             | XGBoost | T-test | 13 | 0.95 |
|             | Dtree   | RF     | 14 | 0.75 |
|             | KNN     | T-test | 7  | 0.95 |
| HLA-B*35:01 | KNN     | T-test | 18 | 0.55 |
|             | Bagging | T-test | 14 | 0.55 |
|             | LR      | T-test | 14 | 0.95 |
|             | Dtree   | T-test | 14 | 0.75 |
|             | NB      | T-test | 14 | 0.75 |
|             | SVM     | T-test | 14 | 0.55 |
|             | XGBoost | T-test | 8  | 0.95 |
| HLA-B*40:01 | KNN     | T-test | 5  | 0.95 |
|             | Bagging | T-test | 5  | 0.95 |
|             | SVM     | T-test | 6  | 0.75 |
|             | XGBoost | T-test | 6  | 0.75 |
|             | NB      | T-test | 6  | 0.75 |
|             | LR      | T-test | 6  | 0.75 |
|             | Dtree   | T-test | 11 | 0.55 |
| HLA-B*40:02 | Dtree   | W-test | 13 | 0.95 |
|             | NB      | T-test | 15 | 0.55 |
|             | SVM     | T-test | 15 | 0.55 |
|             | LR      | T-test | 13 | 0.75 |
|             | KNN     | T-test | 13 | 0.75 |
|             | XGBoost | T-test | 13 | 0.75 |
|             | Bagging | T-test | 11 | 0.95 |
| HLA-B*44:02 | Dtree   | T-test | 10 | 0.55 |
|             | Bagging | T-test | 9  | 0.95 |

|             |         |         |    |      |
|-------------|---------|---------|----|------|
|             | XGBoost | T-test  | 9  | 0.95 |
|             | LR      | LR_RFE  | 15 | 0.95 |
|             | SVM     | LR_RFE  | 15 | 0.75 |
|             | NB      | RF      | 5  | 0.75 |
|             | KNN     | T-test  | 6  | 0.95 |
| HLA-B*44:03 | Dtree   | W-test  | 9  | 0.55 |
|             | SVM     | T-test  | 5  | 0.55 |
|             | KNN     | T-test  | 5  | 0.55 |
|             | LR      | T-test  | 5  | 0.55 |
|             | XGBoost | T-test  | 5  | 0.95 |
|             | NB      | T-test  | 5  | 0.95 |
|             | Bagging | T-test  | 5  | 0.95 |
| HLA-B*51:01 | Dtree   | RF      | 8  | 0.75 |
|             | Bagging | T-test  | 14 | 0.55 |
|             | LR      | T-test  | 9  | 0.55 |
|             | NB      | T-test  | 9  | 0.55 |
|             | KNN     | T-test  | 9  | 0.55 |
|             | SVM     | T-test  | 9  | 0.55 |
|             | XGBoost | T-test  | 7  | 0.95 |
| HLA-B*57:01 | LR      | RF      | 12 | 0.75 |
|             | NB      | T-test  | 12 | 0.95 |
|             | XGBoost | SVM_RFE | 12 | 0.75 |
|             | SVM     | T-test  | 6  | 0.75 |
|             | Bagging | SVM_RFE | 12 | 0.55 |
|             | KNN     | T-test  | 14 | 0.75 |
|             | Dtree   | T-test  | 14 | 0.95 |
| HLA-B*57:03 | XGBoost | T-test  | 5  | 0.55 |
|             | Bagging | T-test  | 5  | 0.55 |
|             | Dtree   | T-test  | 5  | 0.55 |
|             | LR      | T-test  | 5  | 0.75 |
|             | NB      | T-test  | 5  | 0.95 |
|             | SVM     | T-test  | 5  | 0.55 |
|             | KNN     | T-test  | 5  | 0.55 |
| HLA-B*58:01 | Bagging | SVM_RFE | 5  | 0.95 |
|             | XGBoost | SVM_RFE | 17 | 0.95 |
|             | Dtree   | RF      | 7  | 0.75 |
|             | NB      | T-test  | 9  | 0.95 |
|             | KNN     | T-test  | 7  | 0.75 |
|             | SVM     | T-test  | 7  | 0.75 |
|             | LR      | T-test  | 5  | 0.75 |
| HLA-C*01:02 | Bagging | W-test  | 10 | 0.95 |
|             | XGBoost | W-test  | 10 | 0.95 |
|             | NB      | W-test  | 10 | 0.75 |
|             | LR      | W-test  | 9  | 0.95 |

|    |             |         |         |    |      |
|----|-------------|---------|---------|----|------|
|    |             | SVM     | W-test  | 7  | 0.55 |
|    |             | KNN     | T-test  | 9  | 0.75 |
|    |             | Dtree   | T-test  | 6  | 0.95 |
|    | HLA-C*04:01 | Bagging | RF      | 9  | 0.75 |
|    |             | LR      | T-test  | 6  | 0.75 |
|    |             | SVM     | T-test  | 15 | 0.55 |
|    |             | KNN     | T-test  | 14 | 0.55 |
|    |             | Dtree   | T-test  | 13 | 0.75 |
|    |             | XGBoost | T-test  | 13 | 0.75 |
|    |             | NB      | T-test  | 12 | 0.95 |
|    | HLA-C*05:01 | XGBoost | W-test  | 14 | 0.55 |
|    |             | Bagging | W-test  | 12 | 0.95 |
|    |             | Dtree   | T-test  | 12 | 0.95 |
|    |             | NB      | T-test  | 6  | 0.95 |
|    |             | SVM     | T-test  | 10 | 0.95 |
|    |             | KNN     | T-test  | 10 | 0.55 |
|    |             | LR      | T-test  | 9  | 0.55 |
|    | HLA-C*06:02 | Dtree   | RF      | 8  | 0.55 |
|    |             | SVM     | T-test  | 5  | 0.55 |
|    |             | KNN     | T-test  | 5  | 0.55 |
|    |             | LR      | T-test  | 5  | 0.75 |
|    |             | XGBoost | T-test  | 6  | 0.55 |
|    |             | NB      | T-test  | 6  | 0.55 |
|    |             | Bagging | T-test  | 6  | 0.55 |
|    | HLA-C*07:01 | Dtree   | W-test  | 9  | 0.95 |
|    |             | Bagging | W-test  | 12 | 0.95 |
|    |             | NB      | T-test  | 13 | 0.55 |
|    |             | LR      | T-test  | 7  | 0.95 |
|    |             | KNN     | T-test  | 7  | 0.75 |
|    |             | SVM     | T-test  | 7  | 0.75 |
|    |             | XGBoost | T-test  | 6  | 0.75 |
| 13 | HLA-A*01:01 | SVM     | T-test  | 15 | 0.95 |
|    |             | Bagging | T-test  | 13 | 0.75 |
|    |             | NB      | W-test  | 16 | 0.75 |
|    |             | KNN     | W-test  | 12 | 0.95 |
|    |             | Dtree   | T-test  | 13 | 0.75 |
|    |             | XGBoost | T-test  | 6  | 0.95 |
|    |             | LR      | T-test  | 11 | 0.75 |
|    | HLA-A*02:01 | XGBoost | RF      | 10 | 0.75 |
|    |             | KNN     | W-test  | 16 | 0.75 |
|    |             | Bagging | SVM_RFE | 7  | 0.55 |
|    |             | SVM     | T-test  | 9  | 0.75 |
|    |             | LR      | T-test  | 8  | 0.75 |
|    |             | NB      | T-test  | 7  | 0.95 |

|             |         |         |    |      |
|-------------|---------|---------|----|------|
|             | Dtree   | T-test  | 9  | 0.95 |
| HLA-A*03:01 | LR      | T-test  | 5  | 0.55 |
|             | XGBoost | T-test  | 5  | 0.75 |
|             | Bagging | T-test  | 5  | 0.75 |
|             | Dtree   | T-test  | 5  | 0.75 |
|             | SVM     | T-test  | 5  | 0.95 |
|             | KNN     | T-test  | 5  | 0.95 |
|             | NB      | T-test  | 8  | 0.55 |
| HLA-A*11:01 | SVM     | T-test  | 5  | 0.55 |
|             | KNN     | T-test  | 5  | 0.75 |
|             | Bagging | SVM_RFE | 7  | 0.75 |
|             | XGBoost | SVM_RFE | 5  | 0.75 |
|             | NB      | RF      | 15 | 0.95 |
|             | LR      | T-test  | 5  | 0.95 |
|             | Dtree   | SVM_RFE | 7  | 0.75 |
| HLA-A*24:02 | Bagging | LR_RFE  | 9  | 0.75 |
|             | LR      | SVM_RFE | 14 | 0.75 |
|             | NB      | RF      | 18 | 0.75 |
|             | Dtree   | RF      | 7  | 0.95 |
|             | XGBoost | T-test  | 14 | 0.55 |
|             | SVM     | T-test  | 13 | 0.95 |
|             | KNN     | T-test  | 13 | 0.55 |
| HLA-A*29:02 | SVM     | LR_RFE  | 8  | 0.75 |
|             | Dtree   | SVM_RFE | 10 | 0.95 |
|             | Bagging | W-test  | 14 | 0.95 |
|             | XGBoost | W-test  | 14 | 0.95 |
|             | LR      | T-test  | 14 | 0.75 |
|             | NB      | T-test  | 7  | 0.95 |
|             | KNN     | T-test  | 6  | 0.75 |
| HLA-A*31:01 | Bagging | SVM_RFE | 15 | 0.75 |
|             | XGBoost | RF      | 15 | 0.75 |
|             | SVM     | W-test  | 18 | 0.55 |
|             | Dtree   | W-test  | 6  | 0.95 |
|             | LR      | T-test  | 13 | 0.55 |
|             | KNN     | T-test  | 13 | 0.55 |
|             | NB      | T-test  | 12 | 0.55 |
| HLA-A*68:02 | NB      | SVM_RFE | 11 | 0.95 |
|             | SVM     | T-test  | 13 | 0.75 |
|             | Dtree   | LR_RFE  | 7  | 0.55 |
|             | Bagging | LR_RFE  | 7  | 0.55 |
|             | XGBoost | LR_RFE  | 7  | 0.55 |
|             | LR      | T-test  | 7  | 0.55 |
|             | KNN     | W-test  | 8  | 0.75 |
| HLA-B*07:02 | Bagging | RF      | 16 | 0.95 |

|             |         |         |    |      |
|-------------|---------|---------|----|------|
|             | XGBoost | RF      | 16 | 0.95 |
|             | NB      | W-test  | 16 | 0.95 |
|             | Dtree   | W-test  | 16 | 0.55 |
|             | LR      | T-test  | 17 | 0.55 |
|             | KNN     | T-test  | 17 | 0.55 |
|             | SVM     | T-test  | 17 | 0.55 |
| HLA-B*15:01 | Dtree   | SVM_RFE | 14 | 0.55 |
|             | Bagging | W-test  | 17 | 0.95 |
|             | LR      | T-test  | 12 | 0.55 |
|             | XGBoost | T-test  | 11 | 0.75 |
|             | SVM     | T-test  | 7  | 0.75 |
|             | KNN     | T-test  | 14 | 0.55 |
|             | NB      | W-test  | 7  | 0.75 |
| HLA-B*27:01 | KNN     | T-test  | 5  | 0.75 |
|             | SVM     | T-test  | 5  | 0.75 |
|             | Bagging | T-test  | 5  | 0.95 |
|             | NB      | T-test  | 5  | 0.95 |
|             | XGBoost | T-test  | 5  | 0.95 |
|             | LR      | T-test  | 5  | 0.75 |
|             | Dtree   | T-test  | 5  | 0.95 |
| HLA-B*27:02 | Bagging | T-test  | 9  | 0.55 |
|             | XGBoost | T-test  | 8  | 0.75 |
|             | Dtree   | T-test  | 8  | 0.55 |
|             | NB      | T-test  | 8  | 0.55 |
|             | KNN     | T-test  | 8  | 0.55 |
|             | SVM     | T-test  | 8  | 0.55 |
|             | LR      | T-test  | 7  | 0.55 |
| HLA-B*27:05 | LR      | T-test  | 16 | 0.95 |
|             | NB      | LR_RFE  | 17 | 0.55 |
|             | Bagging | LR_RFE  | 14 | 0.55 |
|             | Dtree   | LR_RFE  | 14 | 0.55 |
|             | SVM     | W-test  | 18 | 0.75 |
|             | XGBoost | LR_RFE  | 17 | 0.55 |
|             | KNN     | RF      | 18 | 0.55 |
| HLA-B*27:08 | Bagging | W-test  | 6  | 0.75 |
|             | NB      | SVM_RFE | 11 | 0.75 |
|             | SVM     | T-test  | 5  | 0.55 |
|             | XGBoost | T-test  | 5  | 0.55 |
|             | KNN     | T-test  | 5  | 0.55 |
|             | LR      | T-test  | 5  | 0.55 |
|             | Dtree   | T-test  | 5  | 0.55 |
| HLA-B*27:09 | Bagging | SVM_RFE | 7  | 0.75 |
|             | LR      | LR_RFE  | 18 | 0.95 |
|             | XGBoost | LR_RFE  | 13 | 0.95 |

|             |         |         |    |      |
|-------------|---------|---------|----|------|
|             | Dtree   | RF      | 15 | 0.75 |
|             | SVM     | T-test  | 5  | 0.75 |
|             | NB      | T-test  | 6  | 0.75 |
|             | KNN     | RF      | 13 | 0.95 |
| HLA-B*35:01 | SVM     | SVM_RFE | 15 | 0.95 |
|             | LR      | RF      | 8  | 0.75 |
|             | XGBoost | W-test  | 5  | 0.75 |
|             | Dtree   | W-test  | 5  | 0.55 |
|             | NB      | T-test  | 6  | 0.95 |
|             | Bagging | T-test  | 7  | 0.75 |
|             | KNN     | T-test  | 5  | 0.55 |
| HLA-B*44:02 | XGBoost | W-test  | 11 | 0.55 |
|             | Dtree   | T-test  | 17 | 0.75 |
|             | Bagging | T-test  | 17 | 0.55 |
|             | NB      | T-test  | 8  | 0.55 |
|             | KNN     | T-test  | 6  | 0.55 |
|             | LR      | T-test  | 6  | 0.55 |
|             | SVM     | T-test  | 6  | 0.55 |
| HLA-B*51:01 | XGBoost | RF      | 11 | 0.55 |
|             | Dtree   | W-test  | 5  | 0.55 |
|             | Bagging | W-test  | 5  | 0.55 |
|             | LR      | T-test  | 14 | 0.55 |
|             | NB      | T-test  | 11 | 0.75 |
|             | KNN     | T-test  | 8  | 0.55 |
|             | SVM     | T-test  | 8  | 0.55 |
| HLA-B*57:01 | Bagging | SVM_RFE | 9  | 0.55 |
|             | XGBoost | W-test  | 13 | 0.55 |
|             | Dtree   | W-test  | 10 | 0.75 |
|             | KNN     | T-test  | 12 | 0.55 |
|             | SVM     | T-test  | 12 | 0.55 |
|             | NB      | T-test  | 10 | 0.75 |
|             | LR      | T-test  | 8  | 0.75 |
| HLA-B*57:03 | Dtree   | SVM_RFE | 11 | 0.75 |
|             | NB      | SVM_RFE | 7  | 0.55 |
|             | Bagging | RF      | 7  | 0.95 |
|             | XGBoost | W-test  | 12 | 0.95 |
|             | LR      | T-test  | 16 | 0.95 |
|             | KNN     | T-test  | 8  | 0.75 |
|             | SVM     | T-test  | 8  | 0.75 |
| HLA-B*58:01 | NB      | RF      | 18 | 0.75 |
|             | SVM     | T-test  | 5  | 0.55 |
|             | XGBoost | T-test  | 5  | 0.55 |
|             | KNN     | T-test  | 5  | 0.55 |
|             | LR      | T-test  | 5  | 0.55 |



|    |             |         |        |    |      |
|----|-------------|---------|--------|----|------|
|    |             | Bagging | T-test | 5  | 0.75 |
|    |             | Dtree   | T-test | 5  | 0.95 |
|    | HLA-C*04:01 | Bagging | W-test | 9  | 0.95 |
|    |             | Dtree   | W-test | 6  | 0.55 |
|    |             | XGBoost | W-test | 6  | 0.55 |
|    |             | NB      | T-test | 5  | 0.55 |
|    |             | KNN     | T-test | 6  | 0.95 |
|    |             | SVM     | T-test | 6  | 0.55 |
|    |             | LR      | T-test | 6  | 0.55 |
|    | HLA-C*05:01 | Bagging | W-test | 17 | 0.55 |
|    |             | XGBoost | T-test | 5  | 0.95 |
|    |             | KNN     | T-test | 7  | 0.55 |
|    |             | SVM     | T-test | 7  | 0.55 |
|    |             | LR      | T-test | 6  | 0.75 |
|    |             | NB      | T-test | 6  | 0.75 |
|    |             | Dtree   | T-test | 5  | 0.95 |
|    | HLA-C*06:02 | NB      | LR_RFE | 5  | 0.55 |
|    |             | Dtree   | RF     | 7  | 0.55 |
|    |             | XGBoost | W-test | 6  | 0.75 |
|    |             | Bagging | T-test | 10 | 0.75 |
|    |             | LR      | T-test | 15 | 0.75 |
|    |             | KNN     | T-test | 15 | 0.75 |
|    |             | SVM     | T-test | 11 | 0.75 |
| 14 | HLA-A*01:01 | Bagging | T-test | 12 | 0.75 |
|    |             | Dtree   | T-test | 12 | 0.95 |
|    |             | XGBoost | T-test | 6  | 0.95 |
|    |             | KNN     | T-test | 5  | 0.55 |
|    |             | LR      | T-test | 6  | 0.75 |
|    |             | SVM     | T-test | 5  | 0.75 |
|    |             | NB      | T-test | 6  | 0.75 |
|    | HLA-A*02:01 | XGBoost | T-test | 7  | 0.75 |
|    |             | Dtree   | T-test | 9  | 0.55 |
|    |             | Bagging | T-test | 9  | 0.55 |
|    |             | NB      | T-test | 9  | 0.55 |
|    |             | LR      | T-test | 7  | 0.75 |
|    |             | KNN     | T-test | 7  | 0.75 |
|    |             | SVM     | T-test | 7  | 0.75 |
|    | HLA-A*24:02 | Bagging | T-test | 10 | 0.55 |
|    |             | Dtree   | T-test | 10 | 0.55 |
|    |             | SVM     | T-test | 5  | 0.55 |
|    |             | XGBoost | T-test | 5  | 0.55 |
|    |             | KNN     | T-test | 5  | 0.55 |
|    |             | NB      | T-test | 5  | 0.55 |
|    |             | LR      | T-test | 5  | 0.55 |

|             |         |         |    |      |
|-------------|---------|---------|----|------|
| HLA-A*68:02 | KNN     | W-test  | 10 | 0.75 |
|             | XGBoost | W-test  | 8  | 0.95 |
|             | SVM     | T-test  | 18 | 0.55 |
|             | Bagging | T-test  | 16 | 0.75 |
|             | LR      | T-test  | 9  | 0.95 |
|             | NB      | T-test  | 9  | 0.95 |
|             | Dtree   | T-test  | 8  | 0.95 |
| HLA-B*07:02 | NB      | RF      | 12 | 0.55 |
|             | Dtree   | W-test  | 15 | 0.75 |
|             | KNN     | W-test  | 15 | 0.55 |
|             | LR      | T-test  | 16 | 0.75 |
|             | SVM     | T-test  | 16 | 0.75 |
|             | Bagging | T-test  | 7  | 0.75 |
|             | XGBoost | T-test  | 7  | 0.75 |
| HLA-B*15:01 | Bagging | SVM_RFE | 15 | 0.95 |
|             | KNN     | RF      | 9  | 0.55 |
|             | SVM     | T-test  | 8  | 0.55 |
|             | XGBoost | W-test  | 10 | 0.75 |
|             | Dtree   | W-test  | 9  | 0.95 |
|             | LR      | T-test  | 7  | 0.55 |
|             | NB      | T-test  | 8  | 0.75 |
| HLA-B*27:05 | SVM     | SVM_RFE | 9  | 0.55 |
|             | NB      | LR_RFE  | 11 | 0.95 |
|             | KNN     | SVM_RFE | 9  | 0.55 |
|             | LR      | RF      | 16 | 0.95 |
|             | XGBoost | SVM_RFE | 8  | 0.75 |
|             | Bagging | LR_RFE  | 16 | 0.95 |
|             | Dtree   | LR_RFE  | 16 | 0.95 |
| HLA-B*27:09 | Bagging | W-test  | 10 | 0.95 |
|             | Dtree   | W-test  | 10 | 0.75 |
|             | NB      | T-test  | 7  | 0.55 |
|             | SVM     | T-test  | 5  | 0.95 |
|             | LR      | T-test  | 5  | 0.95 |
|             | XGBoost | T-test  | 5  | 0.95 |
|             | KNN     | T-test  | 5  | 0.95 |
| HLA-B*35:01 | Bagging | SVM_RFE | 7  | 0.95 |
|             | Dtree   | RF      | 5  | 0.55 |
|             | SVM     | T-test  | 5  | 0.95 |
|             | LR      | T-test  | 6  | 0.55 |
|             | NB      | T-test  | 6  | 0.55 |
|             | XGBoost | T-test  | 6  | 0.55 |
|             | KNN     | T-test  | 5  | 0.95 |
| HLA-B*57:01 | Bagging | SVM_RFE | 8  | 0.75 |
|             | KNN     | LR_RFE  | 16 | 0.75 |

|  |             |         |         |    |      |
|--|-------------|---------|---------|----|------|
|  |             | XGBoost | LR_RFE  | 16 | 0.55 |
|  |             | Dtree   | SVM_RFE | 8  | 0.75 |
|  |             | NB      | RF      | 10 | 0.55 |
|  |             | LR      | W-test  | 8  | 0.55 |
|  |             | SVM     | W-test  | 8  | 0.55 |
|  | HLA-C*04:01 | Dtree   | SVM_RFE | 16 | 0.95 |
|  |             | Bagging | SVM_RFE | 18 | 0.55 |
|  |             | KNN     | T-test  | 14 | 0.75 |
|  |             | XGBoost | SVM_RFE | 16 | 0.75 |
|  |             | NB      | T-test  | 5  | 0.55 |
|  |             | SVM     | T-test  | 5  | 0.75 |
|  |             | LR      | T-test  | 5  | 0.75 |
|  | HLA-C*05:01 | Dtree   | RF      | 5  | 0.55 |
|  |             | XGBoost | RF      | 5  | 0.55 |
|  |             | SVM     | RF      | 5  | 0.55 |
|  |             | Bagging | RF      | 5  | 0.55 |
|  |             | KNN     | RF      | 5  | 0.55 |
|  |             | NB      | SVM_RFE | 12 | 0.75 |
|  |             | LR      | T-test  | 15 | 0.95 |
|  | HLA-C*06:02 | Dtree   | RF      | 6  | 0.95 |
|  |             | Bagging | W-test  | 9  | 0.55 |
|  |             | XGBoost | W-test  | 9  | 0.55 |
|  |             | NB      | T-test  | 14 | 0.55 |
|  |             | KNN     | SVM_RFE | 9  | 0.75 |
|  |             | SVM     | T-test  | 10 | 0.75 |
|  |             | LR      | T-test  | 9  | 0.55 |

## Supplementary Table S3

Performance of independent test dataset specific to k-mer(k=8, 9, ..., 14)peptides from algorithms including eXtreme gradient boosting (XGBoost), logistic regression (LR),K-nearest neighbors (KNN) , support vector machine (SVM),Bootstrap Aggregating(Bagging) ,decision tree (Dtree) and naïve bayes (NB).

| Length | HLA-I       | Classifier | AUC    | Sn     | Sp     | MCC    | ACC    |
|--------|-------------|------------|--------|--------|--------|--------|--------|
| 8      | HLA-A*01:01 | LR         | 0.9945 | 0.9552 | 0.9559 | 0.9111 | 0.9556 |
|        |             | SVM        | 0.9923 | 0.9552 | 0.9559 | 0.9111 | 0.9556 |
|        |             | Bagging    | 0.9192 | 1.0000 | 0.7941 | 0.8105 | 0.8963 |
|        |             | XGBoost    | 0.9377 | 1.0000 | 0.8088 | 0.8230 | 0.9037 |
|        |             | KNN        | 0.9687 | 0.9701 | 0.8676 | 0.8417 | 0.9407 |
|        |             | Dtree      | 0.9329 | 0.8806 | 0.9853 | 0.8713 | 0.9333 |

|             |         |        |        |        |        |        |
|-------------|---------|--------|--------|--------|--------|--------|
|             | NB      | 0.9767 | 0.9851 | 0.9118 | 0.8988 | 0.9481 |
| HLA-A*02:01 | LR      | 0.9188 | 0.8862 | 0.8797 | 0.7460 | 0.8730 |
|             | SVM     | 0.9023 | 0.8280 | 0.9177 | 0.7489 | 0.8730 |
|             | Bagging | 0.8778 | 0.8535 | 0.8481 | 0.7016 | 0.8508 |
|             | XGBoost | 0.8797 | 0.8726 | 0.8797 | 0.7523 | 0.8698 |
|             | KNN     | 0.8660 | 0.8790 | 0.8608 | 0.7398 | 0.8698 |
|             | Dtree   | 0.8476 | 0.8280 | 0.8670 | 0.6957 | 0.8476 |
|             | NB      | 0.8766 | 0.8853 | 0.8607 | 0.7462 | 0.8730 |
| HLA-A*03:01 | LR      | 0.9825 | 0.9474 | 0.9483 | 0.8956 | 0.9478 |
|             | SVM     | 0.9577 | 0.9474 | 0.9483 | 0.8956 | 0.9478 |
|             | Bagging | 0.9607 | 0.8947 | 0.9655 | 0.8629 | 0.9304 |
|             | XGBoost | 0.9616 | 0.9298 | 0.9310 | 0.8609 | 0.9304 |
|             | KNN     | 0.9502 | 0.9474 | 0.9483 | 0.8956 | 0.9478 |
|             | Dtree   | 0.9478 | 0.9474 | 0.9483 | 0.8956 | 0.9478 |
|             | NB      | 0.9522 | 0.9649 | 0.9483 | 0.9132 | 0.9565 |
| HLA-A*03:01 | LR      | 0.9825 | 0.9474 | 0.9483 | 0.8956 | 0.9478 |
|             | SVM     | 0.9577 | 0.9474 | 0.9483 | 0.8956 | 0.9478 |
|             | Bagging | 0.9607 | 0.8947 | 0.9655 | 0.8629 | 0.9304 |
|             | XGBoost | 0.9616 | 0.9298 | 0.9310 | 0.8609 | 0.9304 |
|             | KNN     | 0.9502 | 0.9474 | 0.9483 | 0.8956 | 0.9478 |
|             | Dtree   | 0.9478 | 0.9474 | 0.9483 | 0.8956 | 0.9478 |
|             | NB      | 0.9522 | 0.9649 | 0.9483 | 0.9132 | 0.9565 |
| HLA-A*11:01 | LR      | 0.9281 | 1.0000 | 0.7778 | 0.7935 | 0.8857 |
|             | SVM     | 0.9444 | 1.0000 | 0.8333 | 0.8416 | 0.9143 |
|             | Bagging | 0.7990 | 0.8235 | 0.8333 | 0.6569 | 0.8286 |
|             | XGBoost | 0.7892 | 0.7647 | 0.8333 | 0.6000 | 0.8000 |
|             | KNN     | 0.9069 | 1.0000 | 0.8333 | 0.8416 | 0.9143 |
|             | Dtree   | 0.7696 | 0.7059 | 0.8333 | 0.5446 | 0.7714 |
|             | NB      | 0.9575 | 0.8824 | 0.8333 | 0.7157 | 0.8571 |
| HLA-A*24:02 | LR      | 0.9126 | 0.9091 | 0.9333 | 0.8429 | 0.9213 |
|             | SVM     | 0.9611 | 0.8409 | 0.9333 | 0.7782 | 0.8876 |
|             | Bagging | 0.9306 | 0.8636 | 0.9333 | 0.7994 | 0.8989 |
|             | XGBoost | 0.9593 | 0.9091 | 0.9333 | 0.8429 | 0.9213 |
|             | KNN     | 0.9104 | 0.8864 | 0.9333 | 0.8209 | 0.9101 |
|             | Dtree   | 0.8758 | 0.8182 | 0.9333 | 0.7573 | 0.8764 |
|             | NB      | 0.9338 | 0.9545 | 0.9111 | 0.8661 | 0.9326 |
| HLA-A*29:02 | LR      | 0.9517 | 0.9558 | 0.9615 | 0.9174 | 0.9587 |
|             | SVM     | 0.9847 | 0.9669 | 0.9396 | 0.9067 | 0.9532 |
|             | Bagging | 0.9680 | 0.9669 | 0.9505 | 0.9175 | 0.9587 |
|             | XGBoost | 0.9754 | 0.9558 | 0.9505 | 0.9064 | 0.9532 |
|             | KNN     | 0.9510 | 0.9558 | 0.9396 | 0.8954 | 0.9477 |
|             | Dtree   | 0.8758 | 0.7901 | 0.9615 | 0.7632 | 0.8760 |
|             | NB      | 0.9444 | 0.9558 | 0.9670 | 0.9229 | 0.9614 |
| HLA-B*07:02 | LR      | 0.9517 | 0.9558 | 0.9615 | 0.9174 | 0.9587 |

|             |         |        |        |        |        |        |
|-------------|---------|--------|--------|--------|--------|--------|
|             | SVM     | 0.9847 | 0.9669 | 0.9396 | 0.9067 | 0.9532 |
|             | Bagging | 0.9680 | 0.9669 | 0.9505 | 0.9175 | 0.9587 |
|             | XGBoost | 0.9754 | 0.9558 | 0.9505 | 0.9064 | 0.9532 |
|             | KNN     | 0.9510 | 0.9558 | 0.9396 | 0.8954 | 0.9477 |
|             | Dtree   | 0.8758 | 0.7901 | 0.9615 | 0.7632 | 0.8760 |
|             | NB      | 0.9444 | 0.9558 | 0.9670 | 0.9229 | 0.9614 |
| HLA-B*08:01 | LR      | 0.9794 | 0.9913 | 0.9612 | 0.9529 | 0.9762 |
|             | SVM     | 0.9912 | 0.9913 | 0.9655 | 0.9571 | 0.9784 |
|             | Bagging | 0.9802 | 0.9913 | 0.9698 | 0.9613 | 0.9806 |
|             | XGBoost | 0.9904 | 0.9870 | 0.9698 | 0.9569 | 0.9784 |
|             | KNN     | 0.9800 | 0.9913 | 0.9655 | 0.9571 | 0.9784 |
|             | Dtree   | 0.9719 | 0.9784 | 0.9655 | 0.9439 | 0.9719 |
|             | NB      | 0.9769 | 0.9913 | 0.9655 | 0.9571 | 0.9784 |
| HLA-B*13:02 | LR      | 1.0000 | 1.0000 | 1.0000 | 1.0000 | 1.0000 |
|             | SVM     | 1.0000 | 1.0000 | 1.0000 | 1.0000 | 1.0000 |
|             | Bagging | 1.0000 | 1.0000 | 1.0000 | 1.0000 | 1.0000 |
|             | XGBoost | 1.0000 | 1.0000 | 1.0000 | 1.0000 | 1.0000 |
|             | KNN     | 1.0000 | 1.0000 | 1.0000 | 1.0000 | 1.0000 |
|             | Dtree   | 1.0000 | 1.0000 | 1.0000 | 1.0000 | 1.0000 |
|             | NB      | 1.0000 | 1.0000 | 1.0000 | 1.0000 | 1.0000 |
| HLA-B*14:02 | LR      | 0.9864 | 0.9906 | 0.9813 | 0.9719 | 0.9859 |
|             | SVM     | 0.9866 | 0.9906 | 0.9813 | 0.9719 | 0.9859 |
|             | Bagging | 0.9844 | 0.9906 | 0.9813 | 0.9719 | 0.9859 |
|             | XGBoost | 0.9935 | 0.9811 | 0.9813 | 0.9624 | 0.9812 |
|             | KNN     | 0.9858 | 0.9906 | 0.9813 | 0.9719 | 0.9859 |
|             | Dtree   | 0.8444 | 0.7075 | 0.9813 | 0.7169 | 0.8451 |
|             | NB      | 0.9895 | 0.9906 | 0.9813 | 0.9719 | 0.9859 |
| HLA-B*15:01 | LR      | 0.9745 | 0.9375 | 0.8850 | 0.8234 | 0.9111 |
|             | SVM     | 0.9466 | 0.9375 | 0.9115 | 0.8492 | 0.9244 |
|             | Bagging | 0.9343 | 0.9554 | 0.8673 | 0.8256 | 0.9111 |
|             | XGBoost | 0.9383 | 0.9464 | 0.8761 | 0.8244 | 0.9111 |
|             | KNN     | 0.9352 | 0.9196 | 0.8761 | 0.7964 | 0.8978 |
|             | Dtree   | 0.9068 | 0.9464 | 0.8673 | 0.8160 | 0.9067 |
|             | NB      | 0.8738 | 0.9375 | 0.9027 | 0.8406 | 0.9200 |
| HLA-B*18:01 | LR      | 0.9849 | 0.9810 | 0.9717 | 0.9527 | 0.9763 |
|             | SVM     | 0.9738 | 0.9810 | 0.9717 | 0.9527 | 0.9763 |
|             | Bagging | 0.9753 | 0.9810 | 0.9717 | 0.9527 | 0.9763 |
|             | XGBoost | 0.9817 | 0.9810 | 0.9340 | 0.9157 | 0.9573 |
|             | KNN     | 0.9763 | 0.9810 | 0.9717 | 0.9527 | 0.9763 |
|             | Dtree   | 0.9574 | 0.9619 | 0.9528 | 0.9147 | 0.9573 |
|             | NB      | 0.9652 | 0.9810 | 0.9717 | 0.9527 | 0.9763 |
| HLA-B*18:03 | LR      | 1.0000 | 1.0000 | 0.9545 | 0.9545 | 0.9767 |
|             | SVM     | 1.0000 | 1.0000 | 0.9545 | 0.9545 | 0.9767 |
|             | Bagging | 0.9751 | 0.9048 | 0.9545 | 0.8612 | 0.9302 |

|             |         |        |        |        |        |        |
|-------------|---------|--------|--------|--------|--------|--------|
|             | XGBoost | 1.0000 | 1.0000 | 0.9545 | 0.9545 | 0.9767 |
|             | KNN     | 0.9773 | 1.0000 | 0.9091 | 0.9111 | 0.9535 |
|             | Dtree   | 0.9773 | 1.0000 | 0.9545 | 0.9545 | 0.9767 |
|             | NB      | 1.0000 | 1.0000 | 0.9545 | 0.9545 | 0.9767 |
| HLA-B*27:05 | LR      | 0.8317 | 0.8013 | 0.7580 | 0.5597 | 0.7796 |
|             | SVM     | 0.7887 | 0.7821 | 0.7134 | 0.4965 | 0.7476 |
|             | Bagging | 0.7586 | 0.7885 | 0.6943 | 0.4848 | 0.7412 |
|             | XGBoost | 0.8199 | 0.7628 | 0.7643 | 0.5272 | 0.7636 |
|             | KNN     | 0.7410 | 0.7821 | 0.7134 | 0.4965 | 0.7476 |
|             | Dtree   | 0.7254 | 0.7692 | 0.6815 | 0.4524 | 0.7252 |
|             | NB      | 0.7979 | 0.8077 | 0.7006 | 0.5112 | 0.7540 |
| HLA-B*27:09 | LR      | 0.9857 | 0.9500 | 0.9048 | 0.8548 | 0.9268 |
|             | SVM     | 0.9571 | 0.9500 | 0.9048 | 0.8548 | 0.9268 |
|             | Bagging | 0.9274 | 0.9500 | 0.9048 | 0.8548 | 0.9268 |
|             | XGBoost | 0.9464 | 0.9500 | 0.9048 | 0.8548 | 0.9268 |
|             | KNN     | 0.9250 | 0.9500 | 0.9048 | 0.8548 | 0.9268 |
|             | Dtree   | 0.9024 | 0.9000 | 0.9048 | 0.8048 | 0.9024 |
|             | NB      | 0.9857 | 0.9500 | 0.9048 | 0.8548 | 0.9268 |
| HLA-B*35:01 | LR      | 0.8483 | 0.8261 | 0.9362 | 0.7676 | 0.8817 |
|             | SVM     | 0.9070 | 0.8043 | 0.8723 | 0.6786 | 0.8387 |
|             | Bagging | 0.9230 | 0.8043 | 0.9149 | 0.7243 | 0.8602 |
|             | XGBoost | 0.9512 | 0.8261 | 0.8936 | 0.7217 | 0.8602 |
|             | KNN     | 0.8962 | 0.8261 | 0.9362 | 0.7676 | 0.8817 |
|             | Dtree   | 0.8599 | 0.8261 | 0.8936 | 0.7217 | 0.8602 |
|             | NB      | 0.9177 | 0.8261 | 0.8936 | 0.7217 | 0.8602 |
| HLA-B*37:01 | LR      | 0.9923 | 0.9918 | 0.9837 | 0.9755 | 0.9878 |
|             | SVM     | 0.9877 | 0.9918 | 0.9837 | 0.9755 | 0.9878 |
|             | Bagging | 0.9863 | 0.9918 | 0.9675 | 0.9595 | 0.9796 |
|             | XGBoost | 0.9898 | 0.9836 | 0.9756 | 0.9592 | 0.9796 |
|             | KNN     | 0.9877 | 0.9918 | 0.9837 | 0.9755 | 0.9878 |
|             | Dtree   | 0.9756 | 0.9918 | 0.9593 | 0.9515 | 0.9755 |
|             | NB      | 0.9883 | 0.9918 | 0.9837 | 0.9755 | 0.9878 |
| HLA-B*39:01 | LR      | 0.9683 | 0.8148 | 0.9643 | 0.7896 | 0.8909 |
|             | SVM     | 0.9606 | 0.8148 | 0.9643 | 0.7896 | 0.8909 |
|             | Bagging | 0.8844 | 0.8148 | 0.8929 | 0.7105 | 0.8545 |
|             | XGBoost | 0.9223 | 0.8148 | 0.9643 | 0.7896 | 0.8909 |
|             | KNN     | 0.8896 | 0.8148 | 0.9643 | 0.7896 | 0.8909 |
|             | Dtree   | 0.8896 | 0.8148 | 0.9643 | 0.7896 | 0.8909 |
|             | NB      | 0.9636 | 0.8148 | 0.9464 | 0.7693 | 0.8818 |
| HLA-B*39:24 | LR      | 1.0000 | 1.0000 | 1.0000 | 1.0000 | 1.0000 |
|             | SVM     | 1.0000 | 1.0000 | 1.0000 | 1.0000 | 1.0000 |
|             | Bagging | 1.0000 | 1.0000 | 1.0000 | 1.0000 | 1.0000 |
|             | XGBoost | 0.7885 | 1.0000 | 0.5769 | 0.6330 | 0.7843 |
|             | KNN     | 1.0000 | 1.0000 | 1.0000 | 1.0000 | 1.0000 |

|             |         |        |        |        |        |        |
|-------------|---------|--------|--------|--------|--------|--------|
|             | Dtree   | 0.7885 | 1.0000 | 0.5769 | 0.6330 | 0.7843 |
|             | NB      | 1.0000 | 1.0000 | 1.0000 | 1.0000 | 1.0000 |
| HLA-B*40:01 | LR      | 0.9848 | 1.0000 | 0.9545 | 0.9545 | 0.9767 |
|             | SVM     | 0.9762 | 1.0000 | 0.9545 | 0.9545 | 0.9767 |
|             | Bagging | 0.9762 | 1.0000 | 0.9545 | 0.9545 | 0.9767 |
|             | XGBoost | 0.9827 | 1.0000 | 0.9545 | 0.9545 | 0.9767 |
|             | KNN     | 0.9762 | 1.0000 | 0.9545 | 0.9545 | 0.9767 |
|             | Dtree   | 0.9773 | 1.0000 | 0.9545 | 0.9545 | 0.9767 |
|             | NB      | 0.9827 | 1.0000 | 0.9545 | 0.9545 | 0.9767 |
| HLA-B*40:02 | LR      | 0.9440 | 0.9632 | 0.9333 | 0.8969 | 0.9482 |
|             | SVM     | 0.9829 | 0.9766 | 0.8867 | 0.8667 | 0.9316 |
|             | Bagging | 0.9657 | 0.9632 | 0.9600 | 0.9232 | 0.9616 |
|             | XGBoost | 0.9789 | 0.9632 | 0.9533 | 0.9166 | 0.9583 |
|             | KNN     | 0.9128 | 0.9431 | 0.8700 | 0.8152 | 0.9065 |
|             | Dtree   | 0.9216 | 0.9699 | 0.8733 | 0.8471 | 0.9215 |
|             | NB      | 0.9709 | 0.9699 | 0.9333 | 0.9038 | 0.9516 |
| HLA-B*44:02 | LR      | 0.9954 | 0.9310 | 1.0000 | 0.9343 | 0.9661 |
|             | SVM     | 0.9609 | 0.8966 | 1.0000 | 0.9028 | 0.9492 |
|             | Bagging | 0.9282 | 0.8966 | 0.9667 | 0.8662 | 0.9322 |
|             | XGBoost | 0.9695 | 0.8966 | 1.0000 | 0.9028 | 0.9492 |
|             | KNN     | 0.9466 | 0.8966 | 1.0000 | 0.9028 | 0.9492 |
|             | Dtree   | 0.9483 | 0.8966 | 1.0000 | 0.9028 | 0.9492 |
|             | NB      | 0.9529 | 0.8966 | 1.0000 | 0.9028 | 0.9492 |
| HLA-B*44:03 | LR      | 0.9667 | 0.9643 | 0.8966 | 0.8619 | 0.9298 |
|             | SVM     | 0.8842 | 0.8571 | 0.8966 | 0.7546 | 0.8772 |
|             | Bagging | 0.9304 | 0.9643 | 0.8966 | 0.8619 | 0.9298 |
|             | XGBoost | 0.9304 | 0.9643 | 0.8966 | 0.8619 | 0.9298 |
|             | KNN     | 0.9304 | 0.9643 | 0.8966 | 0.8619 | 0.9298 |
|             | Dtree   | 0.9304 | 0.9643 | 0.8966 | 0.8619 | 0.9298 |
|             | NB      | 0.9729 | 0.9643 | 0.8621 | 0.8294 | 0.9123 |
| HLA-B*46:01 | LR      | 0.9548 | 0.9500 | 0.9048 | 0.8548 | 0.9268 |
|             | SVM     | 0.9405 | 0.9500 | 0.9048 | 0.8548 | 0.9268 |
|             | Bagging | 0.9667 | 1.0000 | 0.9048 | 0.9069 | 0.9512 |
|             | XGBoost | 0.9500 | 0.9500 | 0.9048 | 0.8548 | 0.9268 |
|             | KNN     | 0.9226 | 0.9500 | 0.9048 | 0.8548 | 0.9268 |
|             | Dtree   | 0.9036 | 0.9500 | 0.8571 | 0.8091 | 0.9024 |
|             | NB      | 0.9536 | 0.9500 | 0.9048 | 0.8548 | 0.9268 |
| HLA-B*49:01 | LR      | 0.9918 | 0.9766 | 0.9922 | 0.9690 | 0.9844 |
|             | SVM     | 0.9818 | 0.9766 | 0.9922 | 0.9690 | 0.9844 |
|             | Bagging | 0.9881 | 0.9531 | 0.9922 | 0.9462 | 0.9728 |
|             | XGBoost | 0.9877 | 0.9688 | 0.9922 | 0.9613 | 0.9805 |
|             | KNN     | 0.9843 | 0.9766 | 0.9922 | 0.9690 | 0.9844 |
|             | Dtree   | 0.9727 | 0.9531 | 0.9922 | 0.9462 | 0.9728 |
|             | NB      | 0.9817 | 0.9766 | 0.9922 | 0.9690 | 0.9844 |

|             |         |        |        |        |        |        |
|-------------|---------|--------|--------|--------|--------|--------|
| HLA-B*51:01 | LR      | 0.9615 | 0.9955 | 0.4234 | 0.5103 | 0.7088 |
|             | SVM     | 0.9732 | 0.9638 | 0.9414 | 0.9054 | 0.9526 |
|             | Bagging | 0.9188 | 0.9457 | 0.8514 | 0.8005 | 0.8984 |
|             | XGBoost | 0.9667 | 0.9910 | 0.7748 | 0.7840 | 0.8826 |
|             | KNN     | 0.9558 | 0.9638 | 0.9369 | 0.9010 | 0.9503 |
|             | Dtree   | 0.5383 | 1.0000 | 0.0766 | 0.1993 | 0.5372 |
|             | NB      | 0.9589 | 0.9955 | 0.3739 | 0.4711 | 0.6840 |
| HLA-B*51:08 | LR      | 0.9444 | 1.0000 | 0.9444 | 0.9444 | 0.9714 |
|             | SVM     | 0.9739 | 1.0000 | 0.9444 | 0.9444 | 0.9714 |
|             | Bagging | 0.9722 | 1.0000 | 0.9444 | 0.9444 | 0.9714 |
|             | XGBoost | 0.9722 | 1.0000 | 0.9444 | 0.9444 | 0.9714 |
|             | KNN     | 0.9722 | 1.0000 | 0.9444 | 0.9444 | 0.9714 |
|             | Dtree   | 0.9722 | 1.0000 | 0.9444 | 0.9444 | 0.9714 |
|             | NB      | 0.9477 | 1.0000 | 0.9444 | 0.9444 | 0.9714 |
| HLA-B*52:01 | LR      | 0.9706 | 0.9737 | 0.9740 | 0.9477 | 0.9739 |
|             | SVM     | 0.9675 | 0.9737 | 0.9740 | 0.9477 | 0.9739 |
|             | Bagging | 0.9514 | 0.9342 | 0.8831 | 0.8182 | 0.9085 |
|             | XGBoost | 0.9664 | 0.9605 | 0.9610 | 0.9216 | 0.9608 |
|             | KNN     | 0.9727 | 0.9737 | 0.9740 | 0.9477 | 0.9739 |
|             | Dtree   | 0.9411 | 0.9342 | 0.9481 | 0.8824 | 0.9412 |
|             | NB      | 0.9690 | 0.9605 | 0.9740 | 0.9347 | 0.9673 |
| HLA-B*54:01 | LR      | 0.9754 | 0.8800 | 0.9615 | 0.8454 | 0.9216 |
|             | SVM     | 0.9585 | 0.8800 | 0.9231 | 0.8043 | 0.9020 |
|             | Bagging | 0.9615 | 1.0000 | 0.9231 | 0.9245 | 0.9608 |
|             | XGBoost | 0.9823 | 0.8000 | 1.0000 | 0.8191 | 0.9020 |
|             | KNN     | 0.9362 | 0.8400 | 1.0000 | 0.8532 | 0.9216 |
|             | Dtree   | 0.8623 | 0.8400 | 0.8846 | 0.7257 | 0.8627 |
|             | NB      | 0.9246 | 0.8400 | 0.6923 | 0.5373 | 0.7647 |
| HLA-B*57:01 | LR      | 0.9529 | 0.8642 | 0.9634 | 0.8321 | 0.9141 |
|             | SVM     | 0.9410 | 0.8642 | 0.9634 | 0.8321 | 0.9141 |
|             | Bagging | 0.9279 | 0.8395 | 0.9634 | 0.8097 | 0.9018 |
|             | XGBoost | 0.9407 | 0.8642 | 0.9634 | 0.8321 | 0.9141 |
|             | KNN     | 0.9128 | 0.8642 | 0.9634 | 0.8321 | 0.9141 |
|             | Dtree   | 0.8771 | 0.8519 | 0.9024 | 0.7554 | 0.8773 |
|             | NB      | 0.9571 | 0.8642 | 0.9390 | 0.8058 | 0.9018 |
| HLA-B*57:03 | LR      | 0.9595 | 0.9649 | 0.9138 | 0.8795 | 0.9391 |
|             | SVM     | 0.9510 | 0.9649 | 0.9138 | 0.8795 | 0.9391 |
|             | Bagging | 0.9492 | 0.9649 | 0.9138 | 0.8795 | 0.9391 |
|             | XGBoost | 0.9481 | 0.9649 | 0.8966 | 0.8630 | 0.9304 |
|             | KNN     | 0.9377 | 0.9649 | 0.9138 | 0.8795 | 0.9391 |
|             | Dtree   | 0.9046 | 0.9298 | 0.8793 | 0.8099 | 0.9043 |
|             | NB      | 0.9365 | 0.9649 | 0.9138 | 0.8795 | 0.9391 |
| HLA-B*58:01 | LR      | 0.9938 | 0.9481 | 1.0000 | 0.9496 | 0.9742 |
|             | SVM     | 0.9903 | 0.9481 | 1.0000 | 0.9496 | 0.9742 |



|             |         |        |        |        |        |        |
|-------------|---------|--------|--------|--------|--------|--------|
|             | Bagging | 0.9843 | 0.9610 | 0.9872 | 0.9487 | 0.9742 |
|             | XGBoost | 0.9903 | 0.9091 | 0.9872 | 0.8994 | 0.9484 |
|             | KNN     | 0.9798 | 0.9740 | 0.9872 | 0.9614 | 0.9806 |
|             | Dtree   | 0.9288 | 0.8961 | 0.9615 | 0.8598 | 0.9290 |
|             | NB      | 0.9872 | 0.9740 | 0.9872 | 0.9614 | 0.9806 |
| HLA-C*01:02 | LR      | 0.9640 | 0.9630 | 0.9091 | 0.8729 | 0.9358 |
|             | SVM     | 0.9455 | 0.9630 | 0.9091 | 0.8729 | 0.9358 |
|             | Bagging | 0.9399 | 0.9630 | 0.8727 | 0.8385 | 0.9174 |
|             | XGBoost | 0.9428 | 0.9630 | 0.8727 | 0.8385 | 0.9174 |
|             | KNN     | 0.9322 | 0.9630 | 0.9091 | 0.8729 | 0.9358 |
|             | Dtree   | 0.9086 | 0.9444 | 0.8727 | 0.8188 | 0.9083 |
|             | NB      | 0.9424 | 0.9630 | 0.9091 | 0.8729 | 0.9358 |
| HLA-C*02:02 | LR      | 0.9583 | 1.0000 | 0.9200 | 0.9215 | 0.9592 |
|             | SVM     | 0.9350 | 1.0000 | 0.9200 | 0.9215 | 0.9592 |
|             | Bagging | 0.9517 | 0.9583 | 0.9200 | 0.8783 | 0.9388 |
|             | XGBoost | 0.9567 | 1.0000 | 0.9200 | 0.9215 | 0.9592 |
|             | KNN     | 0.9567 | 1.0000 | 0.9200 | 0.9215 | 0.9592 |
|             | Dtree   | 0.8983 | 0.9167 | 0.8800 | 0.7967 | 0.8980 |
|             | NB      | 0.9583 | 1.0000 | 0.9200 | 0.9215 | 0.9592 |
| HLA-C*03:03 | LR      | 0.8748 | 0.9412 | 0.8857 | 0.8276 | 0.9130 |
|             | SVM     | 0.9462 | 0.9412 | 0.8857 | 0.8276 | 0.9130 |
|             | Bagging | 0.9345 | 0.9412 | 0.9429 | 0.8840 | 0.9420 |
|             | XGBoost | 0.9218 | 0.9412 | 0.8857 | 0.8276 | 0.9130 |
|             | KNN     | 0.9067 | 0.9412 | 0.8857 | 0.8276 | 0.9130 |
|             | Dtree   | 0.8546 | 0.8235 | 0.8857 | 0.7110 | 0.8551 |
|             | NB      | 0.8950 | 0.9412 | 0.8857 | 0.8276 | 0.9130 |
| HLA-C*03:04 | LR      | 0.9885 | 0.9825 | 0.9483 | 0.9310 | 0.9652 |
|             | SVM     | 0.9776 | 0.9825 | 0.9310 | 0.9143 | 0.9565 |
|             | Bagging | 0.9574 | 0.9649 | 0.9483 | 0.9132 | 0.9565 |
|             | XGBoost | 0.9903 | 0.9649 | 0.9310 | 0.8962 | 0.9478 |
|             | KNN     | 0.9558 | 0.9825 | 0.9310 | 0.9143 | 0.9565 |
|             | Dtree   | 0.9480 | 0.9649 | 0.9310 | 0.8962 | 0.9478 |
|             | NB      | 0.9661 | 0.9649 | 0.9483 | 0.9132 | 0.9565 |
| HLA-C*04:01 | LR      | 0.9181 | 0.8797 | 0.9686 | 0.8519 | 0.9243 |
|             | SVM     | 0.9387 | 0.8797 | 0.9686 | 0.8519 | 0.9243 |
|             | Bagging | 0.9311 | 0.8608 | 0.9560 | 0.8207 | 0.9085 |
|             | XGBoost | 0.9434 | 0.8797 | 0.9560 | 0.8383 | 0.9180 |
|             | KNN     | 0.9231 | 0.8797 | 0.9686 | 0.8519 | 0.9243 |
|             | Dtree   | 0.9084 | 0.8861 | 0.9308 | 0.8178 | 0.9085 |
|             | NB      | 0.9151 | 0.8797 | 0.9623 | 0.8451 | 0.9211 |
| HLA-C*05:01 | LR      | 0.9655 | 0.9861 | 0.9517 | 0.9383 | 0.9689 |
|             | SVM     | 0.9902 | 0.9861 | 0.9517 | 0.9383 | 0.9689 |
|             | Bagging | 0.9708 | 0.9792 | 0.9586 | 0.9379 | 0.9689 |
|             | XGBoost | 0.9842 | 0.9861 | 0.9517 | 0.9383 | 0.9689 |

|             |         |        |        |        |        |        |
|-------------|---------|--------|--------|--------|--------|--------|
|             | KNN     | 0.9689 | 0.9861 | 0.9517 | 0.9383 | 0.9689 |
|             | Dtree   | 0.9689 | 0.9792 | 0.9586 | 0.9379 | 0.9689 |
|             | NB      | 0.9611 | 0.9861 | 0.9517 | 0.9383 | 0.9689 |
| HLA-C*06:02 | LR      | 0.9778 | 0.9429 | 0.9722 | 0.9158 | 0.9577 |
|             | SVM     | 0.9722 | 0.9429 | 0.9722 | 0.9158 | 0.9577 |
|             | Bagging | 0.9659 | 0.9429 | 0.9722 | 0.9158 | 0.9577 |
|             | XGBoost | 0.9603 | 0.9429 | 0.9722 | 0.9158 | 0.9577 |
|             | KNN     | 0.9496 | 0.9429 | 0.9444 | 0.8873 | 0.9437 |
|             | Dtree   | 0.9286 | 0.8571 | 1.0000 | 0.8675 | 0.9296 |
|             | NB      | 0.9810 | 0.9714 | 0.9444 | 0.9159 | 0.9577 |
| HLA-C*07:01 | LR      | 0.9367 | 0.9778 | 0.8696 | 0.8515 | 0.9231 |
|             | SVM     | 0.9213 | 0.9556 | 0.8696 | 0.8275 | 0.9121 |
|             | Bagging | 0.9234 | 0.9778 | 0.8696 | 0.8515 | 0.9231 |
|             | XGBoost | 0.9343 | 0.9778 | 0.8696 | 0.8515 | 0.9231 |
|             | KNN     | 0.9225 | 0.9556 | 0.8696 | 0.8275 | 0.9121 |
|             | Dtree   | 0.9126 | 0.9556 | 0.8696 | 0.8275 | 0.9121 |
|             | NB      | 0.9319 | 1.0000 | 0.8696 | 0.8759 | 0.9341 |
| HLA-C*07:02 | LR      | 0.9997 | 0.9811 | 0.9815 | 0.9626 | 0.9813 |
|             | SVM     | 0.9825 | 0.9811 | 0.9259 | 0.9080 | 0.9533 |
|             | Bagging | 0.9628 | 0.9811 | 0.9444 | 0.9259 | 0.9626 |
|             | XGBoost | 0.9628 | 0.9811 | 0.9444 | 0.9259 | 0.9626 |
|             | KNN     | 0.9626 | 0.9811 | 0.9259 | 0.9080 | 0.9533 |
|             | Dtree   | 0.9628 | 0.9811 | 0.9444 | 0.9259 | 0.9626 |
|             | NB      | 0.9706 | 0.9811 | 0.9259 | 0.9080 | 0.9533 |
| HLA-C*07:04 | LR      | 0.9947 | 1.0000 | 0.9500 | 0.9500 | 0.9744 |
|             | SVM     | 0.9816 | 1.0000 | 0.9500 | 0.9500 | 0.9744 |
|             | Bagging | 1.0000 | 1.0000 | 1.0000 | 1.0000 | 1.0000 |
|             | XGBoost | 1.0000 | 1.0000 | 1.0000 | 1.0000 | 1.0000 |
|             | KNN     | 0.9750 | 1.0000 | 0.9500 | 0.9500 | 0.9744 |
|             | Dtree   | 1.0000 | 1.0000 | 1.0000 | 1.0000 | 1.0000 |
|             | NB      | 1.0000 | 0.9474 | 1.0000 | 0.9499 | 0.9744 |
| HLA-C*08:02 | LR      | 0.9757 | 0.9753 | 1.0000 | 0.9757 | 0.9877 |
|             | SVM     | 0.9970 | 0.9691 | 1.0000 | 0.9697 | 0.9846 |
|             | Bagging | 0.9741 | 0.9753 | 0.1288 | 0.1954 | 0.5508 |
|             | XGBoost | 0.5120 | 0.5000 | 1.0000 | 0.5779 | 0.7508 |
|             | KNN     | 0.9874 | 0.9753 | 1.0000 | 0.9757 | 0.9877 |
|             | Dtree   | 0.9723 | 0.9568 | 0.9877 | 0.9451 | 0.9723 |
|             | NB      | 0.9756 | 0.9753 | 1.0000 | 0.9757 | 0.9877 |
| HLA-C*12:03 | LR      | 0.9237 | 1.0000 | 0.9032 | 0.9062 | 0.9508 |
|             | SVM     | 0.9624 | 1.0000 | 0.9032 | 0.9062 | 0.9508 |
|             | Bagging | 0.9516 | 1.0000 | 0.9032 | 0.9062 | 0.9508 |
|             | XGBoost | 0.8527 | 0.9000 | 0.8710 | 0.7710 | 0.8852 |
|             | KNN     | 0.9516 | 1.0000 | 0.9032 | 0.9062 | 0.9508 |
|             | Dtree   | 0.9194 | 1.0000 | 0.8387 | 0.8479 | 0.9180 |

|   |             |         |        |        |        |        |        |
|---|-------------|---------|--------|--------|--------|--------|--------|
|   |             | NB      | 0.9634 | 1.0000 | 0.8065 | 0.8198 | 0.9016 |
|   | HLA-C*14:02 | LR      | 0.9859 | 0.9897 | 0.9898 | 0.9795 | 0.9897 |
|   |             | SVM     | 0.9904 | 0.9897 | 0.9898 | 0.9795 | 0.9897 |
|   |             | Bagging | 0.9861 | 0.9897 | 0.7041 | 0.7231 | 0.8462 |
|   |             | XGBoost | 0.9977 | 0.9897 | 0.9898 | 0.9795 | 0.9897 |
|   |             | KNN     | 0.9897 | 0.9897 | 0.9898 | 0.9795 | 0.9897 |
|   |             | Dtree   | 0.9897 | 0.9897 | 0.9898 | 0.9795 | 0.9897 |
|   |             | NB      | 0.9884 | 0.9897 | 0.9898 | 0.9795 | 0.9897 |
|   | HLA-C*15:02 | LR      | 0.9878 | 1.0000 | 0.9250 | 0.9268 | 0.9620 |
|   |             | SVM     | 0.9821 | 1.0000 | 0.9250 | 0.9268 | 0.9620 |
|   |             | Bagging | 0.9843 | 1.0000 | 0.9250 | 0.9268 | 0.9620 |
|   |             | XGBoost | 0.9625 | 1.0000 | 0.9250 | 0.9268 | 0.9620 |
|   |             | KNN     | 0.9468 | 0.9744 | 0.9250 | 0.8999 | 0.9494 |
|   |             | Dtree   | 0.9625 | 1.0000 | 0.9250 | 0.9268 | 0.9620 |
|   |             | NB      | 0.9433 | 1.0000 | 0.9250 | 0.9268 | 0.9620 |
|   | HLA-C*16:01 | LR      | 0.9796 | 0.9613 | 0.9423 | 0.9037 | 0.9518 |
|   |             | SVM     | 0.9755 | 0.9613 | 0.9423 | 0.9037 | 0.9518 |
|   |             | Bagging | 0.9673 | 0.9484 | 0.9423 | 0.8907 | 0.9453 |
|   |             | XGBoost | 0.9733 | 0.9742 | 0.9295 | 0.9045 | 0.9518 |
|   |             | KNN     | 0.9514 | 0.9613 | 0.9359 | 0.8974 | 0.9486 |
|   |             | Dtree   | 0.9422 | 0.9613 | 0.9231 | 0.8849 | 0.9421 |
|   |             | NB      | 0.9561 | 0.9677 | 0.9423 | 0.9103 | 0.9550 |
|   | HLA-C*17:01 | LR      | 0.9277 | 0.8000 | 0.9231 | 0.7298 | 0.8627 |
|   |             | SVM     | 0.9477 | 0.9600 | 0.8077 | 0.7749 | 0.8824 |
|   |             | Bagging | 0.8600 | 0.9600 | 0.7308 | 0.7073 | 0.8431 |
|   |             | XGBoost | 0.9200 | 0.9600 | 0.7308 | 0.7073 | 0.8431 |
|   |             | KNN     | 0.8600 | 0.8000 | 0.9231 | 0.7298 | 0.8627 |
|   |             | Dtree   | 0.8638 | 0.9200 | 0.8077 | 0.7311 | 0.8627 |
|   |             | NB      | 0.9169 | 0.6000 | 0.9231 | 0.5547 | 0.7647 |
| 9 | HLA-A*01:01 | LR      | 0.9507 | 0.9454 | 0.9560 | 0.9014 | 0.9507 |
|   |             | SVM     | 0.9768 | 0.9444 | 0.9569 | 0.9015 | 0.9507 |
|   |             | Bagging | 0.9562 | 0.9416 | 0.9522 | 0.8938 | 0.9469 |
|   |             | XGBoost | 0.9780 | 0.9416 | 0.9522 | 0.8938 | 0.9469 |
|   |             | KNN     | 0.9554 | 0.9473 | 0.9550 | 0.9024 | 0.9512 |
|   |             | Dtree   | 0.9411 | 0.9330 | 0.9493 | 0.8824 | 0.9411 |
|   |             | NB      | 0.9411 | 0.9454 | 0.9569 | 0.9024 | 0.9512 |
|   | HLA-A*02:01 | LR      | 0.9599 | 0.9005 | 0.9183 | 0.8190 | 0.9094 |
|   |             | SVM     | 0.7479 | 0.4665 | 0.6811 | 0.1511 | 0.5738 |
|   |             | Bagging | 0.9100 | 0.8851 | 0.9196 | 0.8052 | 0.9024 |
|   |             | XGBoost | 0.9227 | 0.8980 | 0.9175 | 0.8157 | 0.9077 |
|   |             | KNN     | 0.8543 | 0.9764 | 0.4928 | 0.5360 | 0.7345 |
|   |             | Dtree   | 0.8909 | 0.8754 | 0.9065 | 0.7822 | 0.8909 |
|   |             | NB      | 0.8582 | 0.1861 | 0.9617 | 0.2342 | 0.5739 |
|   | HLA-A*02:02 | LR      | 0.9614 | 0.9272 | 0.8944 | 0.8219 | 0.9107 |

|             |         |        |        |        |        |        |
|-------------|---------|--------|--------|--------|--------|--------|
|             | SVM     | 0.9645 | 0.9238 | 0.9175 | 0.8413 | 0.9207 |
|             | Bagging | 0.9198 | 0.9106 | 0.9109 | 0.8215 | 0.9107 |
|             | XGBoost | 0.9560 | 0.8974 | 0.9274 | 0.8251 | 0.9124 |
|             | KNN     | 0.9208 | 0.9205 | 0.9208 | 0.8413 | 0.9207 |
|             | Dtree   | 0.8959 | 0.9205 | 0.8713 | 0.7927 | 0.8959 |
|             | NB      | 0.9453 | 0.9371 | 0.8812 | 0.8195 | 0.9091 |
| HLA-A*02:03 | LR      | 0.9716 | 0.9599 | 0.9123 | 0.8732 | 0.9361 |
|             | SVM     | 0.9587 | 0.9522 | 0.9231 | 0.8757 | 0.9376 |
|             | Bagging | 0.9440 | 0.9445 | 0.9092 | 0.8543 | 0.9269 |
|             | XGBoost | 0.9519 | 0.8921 | 0.9446 | 0.8379 | 0.9184 |
|             | KNN     | 0.8026 | 0.6148 | 0.9877 | 0.6494 | 0.8014 |
|             | Dtree   | 0.8899 | 0.8767 | 0.9031 | 0.7801 | 0.8899 |
|             | NB      | 0.9193 | 0.9014 | 0.9462 | 0.8484 | 0.9238 |
| HLA-A*02:04 | LR      | 0.9760 | 0.9457 | 0.9458 | 0.8915 | 0.9458 |
|             | SVM     | 0.9665 | 0.9420 | 0.9458 | 0.8879 | 0.9439 |
|             | Bagging | 0.9621 | 0.9384 | 0.9386 | 0.8770 | 0.9385 |
|             | XGBoost | 0.9681 | 0.9457 | 0.9422 | 0.8879 | 0.9439 |
|             | KNN     | 0.9470 | 0.9420 | 0.9422 | 0.8843 | 0.9421 |
|             | Dtree   | 0.9277 | 0.9275 | 0.9278 | 0.8553 | 0.9277 |
|             | NB      | 0.9154 | 0.9457 | 0.9458 | 0.8915 | 0.9458 |
| HLA-B*07:02 | LR      | 0.9824 | 0.9425 | 0.9674 | 0.9101 | 0.9549 |
|             | SVM     | 0.8412 | 0.9566 | 0.3492 | 0.3850 | 0.6529 |
|             | Bagging | 0.7243 | 0.5122 | 0.8763 | 0.4171 | 0.6943 |
|             | XGBoost | 0.9400 | 0.8991 | 0.8402 | 0.7406 | 0.8697 |
|             | KNN     | 0.9570 | 0.9405 | 0.9659 | 0.9067 | 0.9532 |
|             | Dtree   | 0.7097 | 0.9386 | 0.4808 | 0.4717 | 0.7096 |
|             | NB      | 0.9847 | 0.9586 | 0.9396 | 0.8983 | 0.9491 |
| HLA-B*08:01 | LR      | 0.9848 | 0.9394 | 0.9603 | 0.8999 | 0.9498 |
|             | SVM     | 0.9732 | 0.9432 | 0.9432 | 0.8864 | 0.9432 |
|             | Bagging | 0.9569 | 0.8920 | 0.9111 | 0.8033 | 0.9016 |
|             | XGBoost | 0.9638 | 0.9328 | 0.9111 | 0.8440 | 0.9219 |
|             | KNN     | 0.9216 | 0.8864 | 0.9480 | 0.8359 | 0.9172 |
|             | Dtree   | 0.8386 | 0.7443 | 0.9328 | 0.6896 | 0.8386 |
|             | NB      | 0.8414 | 0.9744 | 0.1504 | 0.2203 | 0.5622 |
| HLA-B*13:02 | LR      | 0.9800 | 0.9751 | 0.9818 | 0.9569 | 0.9785 |
|             | SVM     | 0.9880 | 0.9751 | 0.9818 | 0.9569 | 0.9785 |
|             | Bagging | 0.9823 | 0.9718 | 0.9851 | 0.9570 | 0.9785 |
|             | XGBoost | 0.9957 | 0.9751 | 0.9818 | 0.9569 | 0.9785 |
|             | KNN     | 0.9783 | 0.9751 | 0.9818 | 0.9569 | 0.9785 |
|             | Dtree   | 0.9785 | 0.9751 | 0.9818 | 0.9569 | 0.9785 |
|             | NB      | 0.9880 | 0.9768 | 0.9818 | 0.9586 | 0.9793 |
| HLA-B*14:01 | LR      | 1.0000 | 1.0000 | 1.0000 | 1.0000 | 1.0000 |
|             | SVM     | 1.0000 | 1.0000 | 1.0000 | 1.0000 | 1.0000 |
|             | Bagging | 1.0000 | 1.0000 | 1.0000 | 1.0000 | 1.0000 |

|             |         |        |        |        |        |        |
|-------------|---------|--------|--------|--------|--------|--------|
|             | XGBoost | 1.0000 | 1.0000 | 1.0000 | 1.0000 | 1.0000 |
|             | KNN     | 1.0000 | 1.0000 | 1.0000 | 1.0000 | 1.0000 |
|             | Dtree   | 0.9487 | 0.9474 | 0.9500 | 0.8974 | 0.9487 |
|             | NB      | 1.0000 | 1.0000 | 1.0000 | 1.0000 | 1.0000 |
| HLA-B*14:02 | LR      | 0.9741 | 0.9542 | 0.9497 | 0.9039 | 0.9519 |
|             | SVM     | 0.9682 | 0.9817 | 0.9360 | 0.9186 | 0.9588 |
|             | Bagging | 0.9692 | 0.5344 | 0.9817 | 0.5771 | 0.7582 |
|             | XGBoost | 0.9858 | 0.9832 | 0.9314 | 0.9158 | 0.9573 |
|             | KNN     | 0.9592 | 0.9786 | 0.9268 | 0.9066 | 0.9527 |
|             | Dtree   | 0.7980 | 0.9237 | 0.6723 | 0.6156 | 0.7979 |
|             | NB      | 0.9631 | 0.9649 | 0.9329 | 0.8983 | 0.9489 |
| HLA-B*15:01 | LR      | 0.9805 | 0.9971 | 0.4579 | 0.5402 | 0.7274 |
|             | SVM     | 0.9265 | 0.9648 | 0.8869 | 0.8543 | 0.9258 |
|             | Bagging | 0.6679 | 0.7464 | 0.3636 | 0.1191 | 0.5550 |
|             | XGBoost | 0.9789 | 0.9543 | 0.9296 | 0.8842 | 0.9420 |
|             | KNN     | 0.8946 | 0.9371 | 0.8400 | 0.7808 | 0.8885 |
|             | Dtree   | 0.9384 | 0.9388 | 0.9380 | 0.8768 | 0.9384 |
|             | NB      | 0.9557 | 0.9497 | 0.9514 | 0.9011 | 0.9506 |
| HLA-B*15:02 | LR      | 0.9766 | 0.9811 | 0.9444 | 0.9259 | 0.9626 |
|             | SVM     | 0.9430 | 0.9811 | 0.9444 | 0.9259 | 0.9626 |
|             | Bagging | 0.9628 | 0.9811 | 0.9444 | 0.9259 | 0.9626 |
|             | XGBoost | 0.9764 | 0.9811 | 0.9444 | 0.9259 | 0.9626 |
|             | KNN     | 0.9623 | 0.9811 | 0.9444 | 0.9259 | 0.9626 |
|             | Dtree   | 0.9628 | 0.9811 | 0.9444 | 0.9259 | 0.9626 |
|             | NB      | 0.9757 | 0.9811 | 0.9074 | 0.8904 | 0.9439 |
| HLA-B*15:03 | LR      | 0.9358 | 0.8902 | 0.9398 | 0.8312 | 0.9152 |
|             | SVM     | 0.9522 | 0.8902 | 0.9277 | 0.8187 | 0.9091 |
|             | Bagging | 0.9378 | 0.8049 | 0.9518 | 0.7655 | 0.8788 |
|             | XGBoost | 0.9691 | 0.8049 | 0.9518 | 0.7655 | 0.8788 |
|             | KNN     | 0.9182 | 0.9024 | 0.9157 | 0.8182 | 0.9091 |
|             | Dtree   | 0.8783 | 0.8049 | 0.9518 | 0.7655 | 0.8788 |
|             | NB      | 0.9597 | 0.9390 | 0.9157 | 0.8548 | 0.9273 |
| HLA-B*15:09 | LR      | 0.9719 | 0.8571 | 1.0000 | 0.8685 | 0.9302 |
|             | SVM     | 0.9913 | 0.8571 | 1.0000 | 0.8685 | 0.9302 |
|             | Bagging | 0.9253 | 0.8571 | 1.0000 | 0.8685 | 0.9302 |
|             | XGBoost | 0.9773 | 0.8571 | 1.0000 | 0.8685 | 0.9302 |
|             | KNN     | 0.9286 | 0.8571 | 1.0000 | 0.8685 | 0.9302 |
|             | Dtree   | 0.9286 | 0.8571 | 1.0000 | 0.8685 | 0.9302 |
|             | NB      | 0.9848 | 0.8571 | 1.0000 | 0.8685 | 0.9302 |
| HLA-B*15:11 | LR      | 0.9609 | 0.8973 | 0.9409 | 0.8390 | 0.9191 |
|             | SVM     | 0.9314 | 0.9027 | 0.9409 | 0.8443 | 0.9218 |
|             | Bagging | 0.9287 | 0.9027 | 0.9409 | 0.8443 | 0.9218 |
|             | XGBoost | 0.9484 | 0.8973 | 0.9355 | 0.8335 | 0.9164 |
|             | KNN     | 0.9208 | 0.9027 | 0.9409 | 0.8443 | 0.9218 |

|             |         |        |        |        |        |        |
|-------------|---------|--------|--------|--------|--------|--------|
|             | Dtree   | 0.9218 | 0.9027 | 0.9409 | 0.8443 | 0.9218 |
|             | NB      | 0.9204 | 0.9189 | 0.9409 | 0.8600 | 0.9299 |
| HLA-B*15:17 | LR      | 0.8721 | 0.9091 | 0.8400 | 0.7507 | 0.8744 |
|             | SVM     | 0.8920 | 0.9192 | 0.8300 | 0.7519 | 0.8744 |
|             | Bagging | 0.9037 | 0.9192 | 0.8200 | 0.7426 | 0.8693 |
|             | XGBoost | 0.8912 | 0.8889 | 0.8400 | 0.7296 | 0.8643 |
|             | KNN     | 0.8817 | 0.8990 | 0.8400 | 0.7401 | 0.8693 |
|             | Dtree   | 0.8443 | 0.8687 | 0.8200 | 0.6894 | 0.8442 |
|             | NB      | 0.8842 | 0.9293 | 0.8200 | 0.7535 | 0.8744 |
| HLA-B*15:18 | LR      | 0.9838 | 0.9861 | 0.9862 | 0.9723 | 0.9861 |
|             | SVM     | 0.9955 | 0.9954 | 0.9862 | 0.9816 | 0.9908 |
|             | Bagging | 0.9875 | 0.9861 | 0.9862 | 0.9723 | 0.9861 |
|             | XGBoost | 0.9940 | 0.9722 | 0.9862 | 0.9585 | 0.9792 |
|             | KNN     | 0.9930 | 0.9954 | 0.9862 | 0.9816 | 0.9908 |
|             | Dtree   | 0.9908 | 0.9954 | 0.9862 | 0.9816 | 0.9908 |
|             | NB      | 0.9850 | 0.9954 | 0.9862 | 0.9816 | 0.9908 |
| HLA-B*15:42 | LR      | 0.9304 | 0.8873 | 0.8750 | 0.7623 | 0.8811 |
|             | SVM     | 0.8953 | 0.9155 | 0.9028 | 0.8183 | 0.9091 |
|             | Bagging | 0.9219 | 0.9155 | 0.9167 | 0.8322 | 0.9161 |
|             | XGBoost | 0.9475 | 0.9155 | 0.9167 | 0.8322 | 0.9161 |
|             | KNN     | 0.9114 | 0.9014 | 0.9167 | 0.8182 | 0.9091 |
|             | Dtree   | 0.9161 | 0.9155 | 0.9167 | 0.8322 | 0.9161 |
|             | NB      | 0.8933 | 0.9155 | 0.9028 | 0.8183 | 0.9091 |
| HLA-B*18:01 | LR      | 0.9695 | 0.9543 | 0.9400 | 0.8945 | 0.9472 |
|             | SVM     | 0.9388 | 0.5072 | 0.9544 | 0.5163 | 0.7311 |
|             | Bagging | 0.9562 | 0.9519 | 0.9400 | 0.8920 | 0.9460 |
|             | XGBoost | 0.9772 | 0.9591 | 0.9520 | 0.9112 | 0.9556 |
|             | KNN     | 0.6551 | 0.3654 | 0.9520 | 0.3921 | 0.6591 |
|             | Dtree   | 0.7562 | 0.6779 | 0.8345 | 0.5189 | 0.7563 |
|             | NB      | 0.9564 | 0.9447 | 0.9568 | 0.9016 | 0.9508 |
| HLA-B*18:03 | LR      | 0.9242 | 0.9063 | 0.9091 | 0.8153 | 0.9077 |
|             | SVM     | 0.8968 | 0.9375 | 0.9091 | 0.8466 | 0.9231 |
|             | Bagging | 0.8428 | 0.8125 | 0.8788 | 0.6933 | 0.8462 |
|             | XGBoost | 0.8456 | 0.8125 | 0.8788 | 0.6933 | 0.8462 |
|             | KNN     | 0.9242 | 1.0000 | 0.7273 | 0.7534 | 0.8615 |
|             | Dtree   | 0.8456 | 0.8125 | 0.8788 | 0.6933 | 0.8462 |
|             | NB      | 0.9337 | 1.0000 | 0.8485 | 0.8566 | 0.9231 |
| HLA-B*27:01 | LR      | 0.9563 | 1.0000 | 0.6385 | 0.6846 | 0.8190 |
|             | SVM     | 0.9878 | 0.9894 | 0.9683 | 0.9579 | 0.9789 |
|             | Bagging | 0.9819 | 0.9921 | 0.9631 | 0.9555 | 0.9775 |
|             | XGBoost | 0.9886 | 0.9894 | 0.9683 | 0.9579 | 0.9789 |
|             | KNN     | 0.9834 | 0.9947 | 0.9631 | 0.9582 | 0.9789 |
|             | Dtree   | 0.9762 | 0.9894 | 0.9631 | 0.9528 | 0.9762 |
|             | NB      | 0.9799 | 0.9974 | 0.9578 | 0.9558 | 0.9775 |

|             |         |        |        |        |        |        |
|-------------|---------|--------|--------|--------|--------|--------|
| HLA-B*27:02 | LR      | 0.9841 | 0.9844 | 0.9884 | 0.9728 | 0.9864 |
|             | SVM     | 0.9952 | 0.9922 | 0.9884 | 0.9806 | 0.9903 |
|             | Bagging | 0.9881 | 0.9611 | 0.9767 | 0.9380 | 0.9689 |
|             | XGBoost | 0.9940 | 0.9961 | 0.9651 | 0.9616 | 0.9806 |
|             | KNN     | 0.9902 | 0.9922 | 0.9884 | 0.9806 | 0.9903 |
|             | Dtree   | 0.9806 | 0.9805 | 0.9806 | 0.9612 | 0.9806 |
|             | NB      | 0.9828 | 0.9883 | 0.9651 | 0.9537 | 0.9767 |
| HLA-B*27:03 | LR      | 0.9815 | 0.9804 | 0.9806 | 0.9610 | 0.9805 |
|             | SVM     | 0.9799 | 0.9804 | 0.9806 | 0.9610 | 0.9805 |
|             | Bagging | 0.9801 | 0.9804 | 0.9806 | 0.9610 | 0.9805 |
|             | XGBoost | 0.9882 | 0.9804 | 0.9806 | 0.9610 | 0.9805 |
|             | KNN     | 0.9750 | 0.9804 | 0.9709 | 0.9513 | 0.9756 |
|             | Dtree   | 0.9805 | 0.9804 | 0.9806 | 0.9610 | 0.9805 |
|             | NB      | 0.9809 | 0.9804 | 0.9806 | 0.9610 | 0.9805 |
| HLA-B*27:04 | LR      | 0.9817 | 0.9903 | 0.9663 | 0.9569 | 0.9783 |
|             | SVM     | 0.9928 | 0.9807 | 0.9735 | 0.9542 | 0.9771 |
|             | Bagging | 0.9823 | 0.9855 | 0.9687 | 0.9543 | 0.9771 |
|             | XGBoost | 0.9901 | 0.9903 | 0.9711 | 0.9616 | 0.9807 |
|             | KNN     | 0.9813 | 0.9807 | 0.9759 | 0.9566 | 0.9783 |
|             | Dtree   | 0.9771 | 0.9855 | 0.9687 | 0.9543 | 0.9771 |
|             | NB      | 0.9763 | 0.9903 | 0.9663 | 0.9569 | 0.9783 |
| HLA-B*27:05 | LR      | 0.9365 | 0.8273 | 0.9167 | 0.7470 | 0.8720 |
|             | SVM     | 0.7389 | 0.8489 | 0.6660 | 0.5238 | 0.7575 |
|             | Bagging | 0.8625 | 0.8612 | 0.7968 | 0.6593 | 0.8290 |
|             | XGBoost | 0.9016 | 0.8489 | 0.8570 | 0.7060 | 0.8530 |
|             | KNN     | 0.8466 | 0.8664 | 0.7596 | 0.6296 | 0.8130 |
|             | Dtree   | 0.8259 | 0.8546 | 0.7973 | 0.6529 | 0.8259 |
|             | NB      | 0.9348 | 0.9426 | 0.6618 | 0.6297 | 0.8022 |
| HLA-B*27:06 | LR      | 0.9833 | 0.9691 | 0.9387 | 0.9081 | 0.9538 |
|             | SVM     | 0.9816 | 0.9568 | 0.9509 | 0.9077 | 0.9538 |
|             | Bagging | 0.9625 | 0.9568 | 0.9325 | 0.8895 | 0.9446 |
|             | XGBoost | 0.9805 | 0.9630 | 0.9325 | 0.8958 | 0.9477 |
|             | KNN     | 0.9676 | 0.9568 | 0.9571 | 0.9138 | 0.9569 |
|             | Dtree   | 0.9324 | 0.9630 | 0.9018 | 0.8663 | 0.9323 |
|             | NB      | 0.9503 | 0.9691 | 0.9141 | 0.8845 | 0.9415 |
| HLA-B*27:07 | LR      | 0.9880 | 0.9955 | 0.9865 | 0.9820 | 0.9910 |
|             | SVM     | 0.9900 | 0.9955 | 0.9865 | 0.9820 | 0.9910 |
|             | Bagging | 0.9944 | 0.9864 | 0.9865 | 0.9729 | 0.9865 |
|             | XGBoost | 0.9867 | 0.9955 | 0.9820 | 0.9775 | 0.9887 |
|             | KNN     | 0.9908 | 0.9955 | 0.9865 | 0.9820 | 0.9910 |
|             | Dtree   | 0.9842 | 0.9864 | 0.9820 | 0.9684 | 0.9842 |
|             | NB      | 0.9887 | 0.9955 | 0.9865 | 0.9820 | 0.9910 |
| HLA-B*27:08 | LR      | 0.9968 | 0.9947 | 0.9947 | 0.9894 | 0.9947 |
|             | SVM     | 0.9958 | 0.9947 | 0.9947 | 0.9894 | 0.9947 |

|             |         |        |        |        |        |        |
|-------------|---------|--------|--------|--------|--------|--------|
|             | Bagging | 0.9942 | 0.9947 | 0.9947 | 0.9894 | 0.9947 |
|             | XGBoost | 0.9894 | 0.9947 | 0.9788 | 0.9736 | 0.9867 |
|             | KNN     | 0.9946 | 0.9947 | 0.9947 | 0.9894 | 0.9947 |
|             | Dtree   | 0.9814 | 0.9681 | 0.9947 | 0.9632 | 0.9814 |
|             | NB      | 0.9977 | 0.9947 | 0.9947 | 0.9894 | 0.9947 |
| HLA-B*27:09 | LR      | 0.9853 | 0.9066 | 0.9705 | 0.8789 | 0.9386 |
|             | SVM     | 0.9769 | 0.9246 | 0.9574 | 0.8825 | 0.9410 |
|             | Bagging | 0.9311 | 0.5984 | 0.9198 | 0.5473 | 0.7592 |
|             | XGBoost | 0.9775 | 0.9279 | 0.9362 | 0.8641 | 0.9320 |
|             | KNN     | 0.9409 | 0.9115 | 0.9640 | 0.8767 | 0.9378 |
|             | Dtree   | 0.7451 | 0.5541 | 0.9362 | 0.5306 | 0.7453 |
|             | NB      | 0.8338 | 0.0443 | 0.9804 | 0.0700 | 0.5127 |
| HLA-B*27:20 | LR      | 0.9368 | 0.9474 | 0.9500 | 0.8974 | 0.9487 |
|             | SVM     | 0.9605 | 0.8947 | 0.9500 | 0.8470 | 0.9231 |
|             | Bagging | 0.9263 | 0.9474 | 0.9000 | 0.8474 | 0.9231 |
|             | XGBoost | 0.9763 | 0.8947 | 0.9500 | 0.8470 | 0.9231 |
|             | KNN     | 0.9487 | 0.9474 | 0.9500 | 0.8974 | 0.9487 |
|             | Dtree   | 0.8987 | 0.9474 | 0.8500 | 0.7995 | 0.8974 |
|             | NB      | 0.9421 | 0.9474 | 0.9500 | 0.8974 | 0.9487 |
| HLA-B*35:01 | LR      | 0.9612 | 0.9436 | 0.9455 | 0.8891 | 0.9446 |
|             | SVM     | 0.9661 | 0.9387 | 0.9528 | 0.8917 | 0.9458 |
|             | Bagging | 0.9326 | 0.5000 | 0.9620 | 0.5210 | 0.7311 |
|             | XGBoost | 0.9700 | 0.9387 | 0.9424 | 0.8812 | 0.9406 |
|             | KNN     | 0.9477 | 0.9332 | 0.9547 | 0.8881 | 0.9440 |
|             | Dtree   | 0.9397 | 0.9363 | 0.9430 | 0.8793 | 0.9397 |
|             | NB      | 0.9137 | 0.6918 | 0.9792 | 0.7006 | 0.8355 |
| HLA-B*35:03 | LR      | 0.9918 | 0.9809 | 0.9755 | 0.9564 | 0.9782 |
|             | SVM     | 0.9899 | 0.9795 | 0.9755 | 0.9550 | 0.9775 |
|             | Bagging | 0.9850 | 0.9823 | 0.9700 | 0.9524 | 0.9761 |
|             | XGBoost | 0.9947 | 0.9823 | 0.9755 | 0.9578 | 0.9789 |
|             | KNN     | 0.9780 | 0.9809 | 0.9755 | 0.9564 | 0.9782 |
|             | Dtree   | 0.9748 | 0.9754 | 0.9741 | 0.9496 | 0.9748 |
|             | NB      | 0.9720 | 0.9795 | 0.9755 | 0.9550 | 0.9775 |
| HLA-B*35:08 | LR      | 0.9704 | 0.9175 | 0.9641 | 0.8827 | 0.9409 |
|             | SVM     | 0.9740 | 0.9278 | 0.9590 | 0.8873 | 0.9434 |
|             | Bagging | 0.9623 | 0.9175 | 0.9590 | 0.8773 | 0.9383 |
|             | XGBoost | 0.9802 | 0.9124 | 0.9590 | 0.8724 | 0.9357 |
|             | KNN     | 0.9584 | 0.9278 | 0.9590 | 0.8873 | 0.9434 |
|             | Dtree   | 0.9331 | 0.9227 | 0.9436 | 0.8665 | 0.9332 |
|             | NB      | 0.9229 | 0.9278 | 0.9590 | 0.8873 | 0.9434 |
| HLA-B*37:01 | LR      | 0.9774 | 0.9826 | 0.9695 | 0.9522 | 0.9760 |
|             | SVM     | 0.9867 | 0.9767 | 0.9710 | 0.9477 | 0.9739 |
|             | Bagging | 0.8434 | 0.1323 | 0.9710 | 0.1896 | 0.5519 |
|             | XGBoost | 0.9911 | 0.9753 | 0.9739 | 0.9492 | 0.9746 |



|             |         |        |        |        |        |        |
|-------------|---------|--------|--------|--------|--------|--------|
|             | KNN     | 0.9556 | 0.9637 | 0.9289 | 0.8931 | 0.9463 |
|             | Dtree   | 0.5487 | 0.1265 | 0.9710 | 0.1820 | 0.5490 |
|             | NB      | 0.9617 | 0.9840 | 0.9666 | 0.9508 | 0.9753 |
| HLA-B*38:01 | LR      | 0.9916 | 0.9859 | 0.9859 | 0.9718 | 0.9859 |
|             | SVM     | 0.9886 | 0.9872 | 0.9859 | 0.9731 | 0.9865 |
|             | Bagging | 0.9552 | 0.9179 | 0.9846 | 0.9046 | 0.9513 |
|             | XGBoost | 0.6737 | 0.9897 | 0.1050 | 0.2032 | 0.5471 |
|             | KNN     | 0.9859 | 0.9859 | 0.9859 | 0.9718 | 0.9859 |
|             | Dtree   | 0.5461 | 0.9897 | 0.1024 | 0.1998 | 0.5458 |
|             | NB      | 0.9944 | 0.9859 | 0.9859 | 0.9718 | 0.9859 |
| HLA-B*39:01 | LR      | 0.9820 | 0.9717 | 0.9604 | 0.9321 | 0.9660 |
|             | SVM     | 0.9862 | 0.9717 | 0.9717 | 0.9434 | 0.9717 |
|             | Bagging | 0.9744 | 0.9649 | 0.9740 | 0.9389 | 0.9694 |
|             | XGBoost | 0.9855 | 0.9717 | 0.9683 | 0.9400 | 0.9700 |
|             | KNN     | 0.9744 | 0.9706 | 0.9717 | 0.9423 | 0.9711 |
|             | Dtree   | 0.9604 | 0.9570 | 0.9638 | 0.9208 | 0.9604 |
|             | NB      | 0.9758 | 0.9875 | 0.9400 | 0.9286 | 0.9638 |
| HLA-B*39:06 | LR      | 0.9857 | 0.9810 | 0.9748 | 0.9558 | 0.9779 |
|             | SVM     | 0.9970 | 0.9937 | 0.9716 | 0.9655 | 0.9826 |
|             | Bagging | 0.9331 | 0.8639 | 0.9811 | 0.8510 | 0.9226 |
|             | XGBoost | 0.9888 | 0.9937 | 0.9716 | 0.9655 | 0.9826 |
|             | KNN     | 0.9791 | 0.9715 | 0.9716 | 0.9431 | 0.9716 |
|             | Dtree   | 0.9826 | 0.9937 | 0.9716 | 0.9655 | 0.9826 |
|             | NB      | 0.9832 | 0.9937 | 0.9716 | 0.9655 | 0.9826 |
| HLA-B*39:24 | LR      | 0.9696 | 1.0000 | 0.9286 | 0.9306 | 0.9641 |
|             | SVM     | 0.9659 | 0.9897 | 0.9286 | 0.9197 | 0.9590 |
|             | Bagging | 0.9702 | 0.9485 | 0.9286 | 0.8771 | 0.9385 |
|             | XGBoost | 0.9779 | 0.9588 | 0.9286 | 0.8876 | 0.9436 |
|             | KNN     | 0.9659 | 0.9897 | 0.9286 | 0.9197 | 0.9590 |
|             | Dtree   | 0.9383 | 0.9072 | 0.9694 | 0.8785 | 0.9385 |
|             | NB      | 0.9507 | 1.0000 | 0.9286 | 0.9306 | 0.9641 |
| HLA-C*01:02 | LR      | 0.9798 | 0.9771 | 0.9810 | 0.9581 | 0.9790 |
|             | SVM     | 0.9923 | 0.9771 | 0.9810 | 0.9581 | 0.9790 |
|             | Bagging | 0.9784 | 0.9695 | 0.9772 | 0.9467 | 0.9733 |
|             | XGBoost | 0.9865 | 0.9733 | 0.9810 | 0.9543 | 0.9771 |
|             | KNN     | 0.9800 | 0.9198 | 0.9848 | 0.9067 | 0.9524 |
|             | Dtree   | 0.9733 | 0.9695 | 0.9772 | 0.9467 | 0.9733 |
|             | NB      | 0.9674 | 0.9771 | 0.9810 | 0.9581 | 0.9790 |
| HLA-C*02:02 | LR      | 0.9728 | 0.9680 | 0.9361 | 0.9046 | 0.9521 |
|             | SVM     | 0.8665 | 0.9758 | 0.1694 | 0.2454 | 0.5724 |
|             | Bagging | 0.9621 | 0.9680 | 0.9293 | 0.8980 | 0.9487 |
|             | XGBoost | 0.9452 | 0.9816 | 0.8664 | 0.8536 | 0.9240 |
|             | KNN     | 0.6278 | 0.9041 | 0.3040 | 0.2600 | 0.6039 |
|             | Dtree   | 0.9621 | 0.9680 | 0.9293 | 0.8980 | 0.9487 |

|             |         |        |        |        |        |        |
|-------------|---------|--------|--------|--------|--------|--------|
|             | NB      | 0.9596 | 0.9554 | 0.9448 | 0.9003 | 0.9501 |
| HLA-C*03:03 | LR      | 0.6000 | 0.9989 | 0.0611 | 0.1730 | 0.5298 |
|             | SVM     | 0.9512 | 0.9979 | 0.7703 | 0.7888 | 0.8840 |
|             | Bagging | 0.9372 | 0.9536 | 0.5701 | 0.5669 | 0.7617 |
|             | XGBoost | 0.8633 | 0.9979 | 0.6807 | 0.7155 | 0.8392 |
|             | KNN     | 0.9499 | 0.9483 | 0.9526 | 0.9009 | 0.9504 |
|             | Dtree   | 0.9436 | 0.9378 | 0.9494 | 0.8872 | 0.9436 |
|             | NB      | 0.9392 | 0.7795 | 0.9779 | 0.7728 | 0.8788 |
| HLA-C*03:04 | LR      | 0.9683 | 0.9656 | 0.9538 | 0.9195 | 0.9597 |
|             | SVM     | 0.9471 | 0.7382 | 0.9207 | 0.6702 | 0.8295 |
|             | Bagging | 0.9707 | 0.9467 | 0.9657 | 0.9125 | 0.9562 |
|             | XGBoost | 0.6777 | 0.7038 | 0.6497 | 0.3540 | 0.6767 |
|             | KNN     | 0.6443 | 0.3235 | 0.9633 | 0.3732 | 0.6436 |
|             | Dtree   | 0.9568 | 0.9538 | 0.9598 | 0.9136 | 0.9568 |
|             | NB      | 0.9596 | 0.9656 | 0.9538 | 0.9195 | 0.9597 |
| HLA-C*04:01 | LR      | 0.9701 | 0.9167 | 0.9470 | 0.8641 | 0.9319 |
|             | SVM     | 0.8875 | 0.6952 | 0.9457 | 0.6621 | 0.8205 |
|             | Bagging | 0.7473 | 0.4633 | 0.9710 | 0.5042 | 0.7172 |
|             | XGBoost | 0.9620 | 0.9143 | 0.9414 | 0.8560 | 0.9278 |
|             | KNN     | 0.9133 | 0.8779 | 0.9414 | 0.8210 | 0.9097 |
|             | Dtree   | 0.7196 | 0.4688 | 0.9704 | 0.5078 | 0.7197 |
|             | NB      | 0.9402 | 0.7465 | 0.9858 | 0.7542 | 0.8662 |
| HLA-C*05:01 | LR      | 0.9471 | 0.9836 | 0.9373 | 0.9219 | 0.9605 |
|             | SVM     | 0.9746 | 0.9768 | 0.9496 | 0.9267 | 0.9632 |
|             | Bagging | 0.8907 | 0.2374 | 0.9986 | 0.3641 | 0.6183 |
|             | XGBoost | 0.8969 | 0.3915 | 0.9510 | 0.4133 | 0.6714 |
|             | KNN     | 0.9628 | 0.9700 | 0.9537 | 0.9238 | 0.9618 |
|             | Dtree   | 0.5218 | 0.0559 | 0.9877 | 0.1203 | 0.5222 |
|             | NB      | 0.9640 | 0.9782 | 0.9469 | 0.9255 | 0.9625 |
| HLA-C*06:02 | LR      | 0.9419 | 0.9946 | 0.7362 | 0.7564 | 0.8653 |
|             | SVM     | 0.9735 | 0.9494 | 0.9440 | 0.8934 | 0.9467 |
|             | Bagging | 0.9597 | 0.9385 | 0.9440 | 0.8825 | 0.9413 |
|             | XGBoost | 0.9772 | 0.9611 | 0.9322 | 0.8937 | 0.9467 |
|             | KNN     | 0.9517 | 0.9278 | 0.9512 | 0.8943 | 0.9471 |
|             | Dtree   | 0.9413 | 0.9439 | 0.9386 | 0.8825 | 0.9413 |
|             | NB      | 0.9483 | 0.9656 | 0.9304 | 0.8966 | 0.9480 |
| HLA-C*07:01 | LR      | 0.9708 | 0.9606 | 0.9368 | 0.8977 | 0.9487 |
|             | SVM     | 0.9495 | 0.8650 | 0.8680 | 0.7330 | 0.8665 |
|             | Bagging | 0.9270 | 0.9522 | 0.8399 | 0.7971 | 0.8960 |
|             | XGBoost | 0.9545 | 0.6540 | 0.9480 | 0.6300 | 0.8011 |
|             | KNN     | 0.9586 | 0.9480 | 0.9649 | 0.9130 | 0.9564 |
|             | Dtree   | 0.8932 | 0.9494 | 0.8371 | 0.7914 | 0.8932 |
|             | NB      | 0.9524 | 0.9170 | 0.9593 | 0.8771 | 0.9382 |
| HLA-C*07:02 | LR      | 0.9452 | 0.9646 | 0.9278 | 0.8930 | 0.9462 |

|             |         |        |        |        |        |        |
|-------------|---------|--------|--------|--------|--------|--------|
|             | SVM     | 0.5142 | 0.9952 | 0.0257 | 0.0851 | 0.5100 |
|             | Bagging | 0.8982 | 0.7524 | 0.9406 | 0.7057 | 0.8466 |
|             | XGBoost | 0.9493 | 0.8328 | 0.9358 | 0.7728 | 0.8843 |
|             | KNN     | 0.7649 | 0.5997 | 0.9246 | 0.5544 | 0.7622 |
|             | Dtree   | 0.8570 | 0.7974 | 0.9165 | 0.7191 | 0.8570 |
|             | NB      | 0.6978 | 1.0000 | 0.0032 | 0.0401 | 0.5012 |
| HLA-C*07:04 | LR      | 0.8449 | 0.6679 | 0.9890 | 0.6938 | 0.8286 |
|             | SVM     | 0.8746 | 1.0000 | 0.0018 | 0.0303 | 0.5005 |
|             | Bagging | 0.9635 | 0.6385 | 0.9780 | 0.6556 | 0.8084 |
|             | XGBoost | 0.9781 | 0.9615 | 0.8352 | 0.8030 | 0.8983 |
|             | KNN     | 0.9610 | 0.9596 | 0.9597 | 0.9193 | 0.9597 |
|             | Dtree   | 0.6294 | 0.2697 | 0.9890 | 0.3726 | 0.6297 |
|             | NB      | 0.9671 | 0.4367 | 0.9725 | 0.4848 | 0.7049 |
| HLA-C*08:02 | LR      | 0.9349 | 0.2953 | 0.9644 | 0.3495 | 0.6300 |
|             | SVM     | 0.9799 | 0.9593 | 0.9613 | 0.9206 | 0.9603 |
|             | Bagging | 0.9052 | 0.6029 | 0.9583 | 0.6004 | 0.7807 |
|             | XGBoost | 0.9671 | 0.8513 | 0.9542 | 0.8099 | 0.9028 |
|             | KNN     | 0.9625 | 0.9644 | 0.9563 | 0.9206 | 0.9603 |
|             | Dtree   | 0.9573 | 0.9582 | 0.9563 | 0.9145 | 0.9573 |
|             | NB      | 0.9413 | 0.9644 | 0.9573 | 0.9217 | 0.9608 |
| HLA-C*12:03 | LR      | 0.9845 | 0.9867 | 0.9069 | 0.8964 | 0.9467 |
|             | SVM     | 0.9665 | 0.9947 | 0.8723 | 0.8734 | 0.9334 |
|             | Bagging | 0.8800 | 0.8933 | 0.8245 | 0.7195 | 0.8589 |
|             | XGBoost | 0.9803 | 0.9787 | 0.9441 | 0.9233 | 0.9614 |
|             | KNN     | 0.8861 | 0.8053 | 0.9574 | 0.7719 | 0.8815 |
|             | Dtree   | 0.5040 | 1.0000 | 0.0080 | 0.0632 | 0.5033 |
|             | NB      | 0.9716 | 0.9947 | 0.8537 | 0.8568 | 0.9241 |
| HLA-C*14:02 | LR      | 0.9671 | 1.0000 | 0.8747 | 0.8815 | 0.9372 |
|             | SVM     | 0.9918 | 0.9836 | 0.9619 | 0.9457 | 0.9727 |
|             | Bagging | 0.9800 | 0.9863 | 0.9619 | 0.9484 | 0.9741 |
|             | XGBoost | 0.9841 | 0.9863 | 0.9619 | 0.9484 | 0.9741 |
|             | KNN     | 0.9752 | 0.9863 | 0.9619 | 0.9484 | 0.9741 |
|             | Dtree   | 0.9632 | 0.9727 | 0.9537 | 0.9265 | 0.9632 |
|             | NB      | 0.9644 | 0.9891 | 0.9591 | 0.9486 | 0.9741 |
| HLA-C*15:02 | LR      | 0.9593 | 0.9557 | 0.9392 | 0.8950 | 0.9474 |
|             | SVM     | 0.9661 | 0.9668 | 0.9309 | 0.8982 | 0.9488 |
|             | Bagging | 0.9432 | 0.9584 | 0.9309 | 0.8897 | 0.9447 |
|             | XGBoost | 0.9688 | 0.9668 | 0.9309 | 0.8982 | 0.9488 |
|             | KNN     | 0.9478 | 0.9668 | 0.9309 | 0.8982 | 0.9488 |
|             | Dtree   | 0.9170 | 0.9030 | 0.9309 | 0.8343 | 0.9170 |
|             | NB      | 0.9769 | 0.9640 | 0.9392 | 0.9035 | 0.9516 |
| HLA-C*16:01 | LR      | 0.9515 | 0.8729 | 0.9709 | 0.8480 | 0.9220 |
|             | SVM     | 0.9705 | 0.9495 | 0.8303 | 0.7853 | 0.8898 |
|             | Bagging | 0.9656 | 0.8453 | 0.9847 | 0.8383 | 0.9151 |

|    |             |         |        |        |        |        |        |
|----|-------------|---------|--------|--------|--------|--------|--------|
|    |             | XGBoost | 0.9831 | 0.9449 | 0.9572 | 0.9021 | 0.9510 |
|    |             | KNN     | 0.6419 | 0.7213 | 0.5612 | 0.2861 | 0.6412 |
|    |             | Dtree   | 0.9487 | 0.9219 | 0.9755 | 0.8988 | 0.9487 |
|    |             | NB      | 0.8789 | 0.4043 | 0.9434 | 0.4129 | 0.6741 |
|    | HLA-C*17:01 | LR      | 0.9067 | 0.8929 | 0.9529 | 0.8476 | 0.9231 |
|    |             | SVM     | 0.9202 | 0.8929 | 0.9529 | 0.8476 | 0.9231 |
|    |             | Bagging | 0.9165 | 0.8571 | 0.9647 | 0.8271 | 0.9112 |
|    |             | XGBoost | 0.9458 | 0.8690 | 0.9647 | 0.8380 | 0.9172 |
|    |             | KNN     | 0.9229 | 0.8929 | 0.9529 | 0.8476 | 0.9231 |
|    |             | Dtree   | 0.9169 | 0.8690 | 0.9647 | 0.8380 | 0.9172 |
|    |             | NB      | 0.9605 | 0.9167 | 0.9176 | 0.8343 | 0.9172 |
| 10 | HLA-A*01:01 | LR      | 0.9779 | 0.9843 | 0.9487 | 0.9336 | 0.9665 |
|    |             | SVM     | 0.8625 | 0.5839 | 0.8772 | 0.4824 | 0.7307 |
|    |             | Bagging | 0.8123 | 0.8613 | 0.4018 | 0.2962 | 0.6313 |
|    |             | XGBoost | 0.8087 | 0.6734 | 0.9665 | 0.6695 | 0.8201 |
|    |             | KNN     | 0.9712 | 0.9821 | 0.9487 | 0.9313 | 0.9654 |
|    |             | Dtree   | 0.9609 | 0.9664 | 0.9554 | 0.9218 | 0.9609 |
|    |             | NB      | 0.9478 | 0.6174 | 0.9621 | 0.6175 | 0.7899 |
|    | HLA-A*02:01 | LR      | 0.9573 | 0.9754 | 0.7075 | 0.7088 | 0.8414 |
|    |             | SVM     | 0.7850 | 0.9802 | 0.6679 | 0.6821 | 0.8240 |
|    |             | Bagging | 0.6035 | 0.9216 | 0.3283 | 0.3104 | 0.6248 |
|    |             | XGBoost | 0.8856 | 0.9018 | 0.7387 | 0.6491 | 0.8202 |
|    |             | KNN     | 0.9020 | 0.9216 | 0.8028 | 0.7296 | 0.8622 |
|    |             | Dtree   | 0.6160 | 0.9103 | 0.3217 | 0.2869 | 0.6159 |
|    |             | NB      | 0.4902 | 0.0878 | 0.9245 | 0.0225 | 0.5064 |
|    | HLA-A*02:02 | LR      | 0.9399 | 0.9550 | 0.8756 | 0.8331 | 0.9152 |
|    |             | SVM     | 0.9413 | 0.9450 | 0.9055 | 0.8511 | 0.9252 |
|    |             | Bagging | 0.9308 | 0.9300 | 0.8955 | 0.8260 | 0.9127 |
|    |             | XGBoost | 0.9572 | 0.9500 | 0.8856 | 0.8372 | 0.9177 |
|    |             | KNN     | 0.9225 | 0.9550 | 0.8856 | 0.8425 | 0.9202 |
|    |             | Dtree   | 0.9228 | 0.9600 | 0.8856 | 0.8478 | 0.9227 |
|    |             | NB      | 0.9245 | 0.9450 | 0.9005 | 0.8463 | 0.9227 |
|    | HLA-A*02:03 | LR      | 0.9765 | 0.9500 | 0.9315 | 0.8816 | 0.9407 |
|    |             | SVM     | 0.9556 | 0.9500 | 0.9315 | 0.8816 | 0.9407 |
|    |             | Bagging | 0.9423 | 0.9281 | 0.9283 | 0.8565 | 0.9282 |
|    |             | XGBoost | 0.9667 | 0.9250 | 0.9408 | 0.8659 | 0.9329 |
|    |             | KNN     | 0.9454 | 0.9375 | 0.9377 | 0.8752 | 0.9376 |
|    |             | Dtree   | 0.9033 | 0.8938 | 0.9128 | 0.8067 | 0.9033 |
|    |             | NB      | 0.9528 | 0.9531 | 0.9315 | 0.8848 | 0.9423 |
|    | HLA-A*02:04 | LR      | 0.9758 | 0.9677 | 1.0000 | 0.9687 | 0.9841 |
|    |             | SVM     | 0.9698 | 0.9677 | 1.0000 | 0.9687 | 0.9841 |
|    |             | Bagging | 0.9970 | 0.9355 | 1.0000 | 0.9383 | 0.9683 |
|    |             | XGBoost | 0.9758 | 0.9355 | 1.0000 | 0.9383 | 0.9683 |
|    |             | KNN     | 0.9682 | 0.9677 | 0.9688 | 0.9365 | 0.9683 |

|             |         |        |        |        |        |        |
|-------------|---------|--------|--------|--------|--------|--------|
|             | Dtree   | 0.9677 | 0.9355 | 1.0000 | 0.9383 | 0.9683 |
|             | NB      | 0.9688 | 0.9677 | 1.0000 | 0.9687 | 0.9841 |
| HLA-A*02:05 | LR      | 0.9840 | 0.9733 | 0.9211 | 0.8953 | 0.9470 |
|             | SVM     | 0.9691 | 0.9200 | 0.9737 | 0.8953 | 0.9470 |
|             | Bagging | 0.9586 | 0.8933 | 0.9737 | 0.8702 | 0.9338 |
|             | XGBoost | 0.9725 | 0.9067 | 0.9474 | 0.8549 | 0.9272 |
|             | KNN     | 0.9708 | 0.9200 | 0.9737 | 0.8953 | 0.9470 |
|             | Dtree   | 0.9138 | 0.8933 | 0.9342 | 0.8284 | 0.9139 |
|             | NB      | 0.9546 | 0.9200 | 0.9737 | 0.8953 | 0.9470 |
| HLA-A*02:06 | LR      | 0.9635 | 0.9624 | 0.9065 | 0.8702 | 0.9344 |
|             | SVM     | 0.9636 | 0.9671 | 0.8879 | 0.8575 | 0.9274 |
|             | Bagging | 0.9344 | 0.9014 | 0.9206 | 0.8221 | 0.9110 |
|             | XGBoost | 0.9560 | 0.9765 | 0.8785 | 0.8590 | 0.9274 |
|             | KNN     | 0.8957 | 0.7793 | 0.9486 | 0.7388 | 0.8642 |
|             | Dtree   | 0.9274 | 0.9390 | 0.9159 | 0.8550 | 0.9274 |
|             | NB      | 0.9194 | 0.9577 | 0.9065 | 0.8653 | 0.9321 |
| HLA-A*02:07 | LR      | 0.9381 | 0.8913 | 0.9570 | 0.8504 | 0.9243 |
|             | SVM     | 0.9079 | 0.8913 | 0.9570 | 0.8504 | 0.9243 |
|             | Bagging | 0.9572 | 0.8370 | 0.9570 | 0.8001 | 0.8973 |
|             | XGBoost | 0.9713 | 0.8913 | 0.9462 | 0.8390 | 0.9189 |
|             | KNN     | 0.9377 | 0.9022 | 0.9570 | 0.8607 | 0.9297 |
|             | Dtree   | 0.9133 | 0.8804 | 0.9462 | 0.8287 | 0.9135 |
|             | NB      | 0.9202 | 0.8913 | 0.9570 | 0.8504 | 0.9243 |
| HLA-A*02:17 | LR      | 0.9860 | 1.0000 | 0.9677 | 0.9677 | 0.9836 |
|             | SVM     | 0.9763 | 1.0000 | 0.9677 | 0.9677 | 0.9836 |
|             | Bagging | 0.9903 | 0.9000 | 1.0000 | 0.9059 | 0.9508 |
|             | XGBoost | 0.9672 | 0.9667 | 0.9677 | 0.9344 | 0.9672 |
|             | KNN     | 0.9677 | 1.0000 | 0.9355 | 0.9365 | 0.9672 |
|             | Dtree   | 0.9672 | 0.9667 | 0.9677 | 0.9344 | 0.9672 |
|             | NB      | 0.9516 | 1.0000 | 0.9355 | 0.9365 | 0.9672 |
| HLA-A*03:01 | LR      | 0.9770 | 0.9577 | 0.9296 | 0.8876 | 0.9436 |
|             | SVM     | 0.9521 | 0.9556 | 0.9316 | 0.8875 | 0.9436 |
|             | Bagging | 0.9434 | 0.9577 | 0.9256 | 0.8836 | 0.9416 |
|             | XGBoost | 0.9718 | 0.9556 | 0.9256 | 0.8816 | 0.9406 |
|             | KNN     | 0.9479 | 0.9597 | 0.9316 | 0.8916 | 0.9456 |
|             | Dtree   | 0.9356 | 0.9556 | 0.9155 | 0.8718 | 0.9355 |
|             | NB      | 0.9217 | 0.9415 | 0.9457 | 0.8872 | 0.9436 |
| HLA-A*11:01 | LR      | 0.9748 | 0.9575 | 0.9423 | 0.8999 | 0.9499 |
|             | SVM     | 0.9468 | 0.9609 | 0.9355 | 0.8966 | 0.9482 |
|             | Bagging | 0.9610 | 0.9201 | 0.9457 | 0.8660 | 0.9329 |
|             | XGBoost | 0.9733 | 0.9507 | 0.9355 | 0.8863 | 0.9431 |
|             | KNN     | 0.9537 | 0.9558 | 0.9474 | 0.9032 | 0.9516 |
|             | Dtree   | 0.9329 | 0.9320 | 0.9338 | 0.8658 | 0.9329 |
|             | NB      | 0.9601 | 0.9626 | 0.9321 | 0.8951 | 0.9473 |

|             |         |        |        |        |        |        |
|-------------|---------|--------|--------|--------|--------|--------|
| HLA-A*23:01 | LR      | 0.9103 | 0.8898 | 0.9580 | 0.8500 | 0.9241 |
|             | SVM     | 0.9784 | 0.9322 | 0.9412 | 0.8734 | 0.9367 |
|             | Bagging | 0.9427 | 0.8898 | 0.9496 | 0.8411 | 0.9198 |
|             | XGBoost | 0.9572 | 0.8898 | 0.9580 | 0.8500 | 0.9241 |
|             | KNN     | 0.9349 | 0.9153 | 0.9412 | 0.8568 | 0.9283 |
|             | Dtree   | 0.9197 | 0.8814 | 0.9580 | 0.8420 | 0.9198 |
|             | NB      | 0.9108 | 0.9322 | 0.9412 | 0.8734 | 0.9367 |
| HLA-A*24:02 | LR      | 0.9913 | 0.9680 | 0.9594 | 0.9275 | 0.9637 |
|             | SVM     | 0.9848 | 0.9564 | 0.9739 | 0.9305 | 0.9652 |
|             | Bagging | 0.9768 | 0.9622 | 0.9652 | 0.9274 | 0.9637 |
|             | XGBoost | 0.9813 | 0.9535 | 0.9739 | 0.9276 | 0.9637 |
|             | KNN     | 0.9652 | 0.9564 | 0.9623 | 0.9187 | 0.9594 |
|             | Dtree   | 0.9521 | 0.9331 | 0.9710 | 0.9048 | 0.9521 |
|             | NB      | 0.9771 | 0.9564 | 0.9739 | 0.9305 | 0.9652 |
| HLA-A*24:06 | LR      | 1.0000 | 1.0000 | 1.0000 | 1.0000 | 1.0000 |
|             | SVM     | 1.0000 | 1.0000 | 1.0000 | 1.0000 | 1.0000 |
|             | Bagging | 1.0000 | 1.0000 | 1.0000 | 1.0000 | 1.0000 |
|             | XGBoost | 1.0000 | 1.0000 | 1.0000 | 1.0000 | 1.0000 |
|             | KNN     | 1.0000 | 1.0000 | 1.0000 | 1.0000 | 1.0000 |
|             | Dtree   | 1.0000 | 1.0000 | 1.0000 | 1.0000 | 1.0000 |
|             | NB      | 1.0000 | 1.0000 | 1.0000 | 1.0000 | 1.0000 |
| HLA-A*26:01 | LR      | 0.9636 | 0.9231 | 0.9394 | 0.8627 | 0.9313 |
|             | SVM     | 0.9781 | 0.9231 | 0.9697 | 0.8940 | 0.9466 |
|             | Bagging | 0.9421 | 0.9231 | 0.9697 | 0.8940 | 0.9466 |
|             | XGBoost | 0.9284 | 0.8769 | 0.9545 | 0.8344 | 0.9160 |
|             | KNN     | 0.9451 | 0.9231 | 0.9697 | 0.8940 | 0.9466 |
|             | Dtree   | 0.9781 | 0.9231 | 0.9697 | 0.8940 | 0.9466 |
|             | NB      | 0.9801 | 0.9385 | 0.9697 | 0.9088 | 0.9542 |
| HLA-A*29:02 | LR      | 0.9770 | 0.9224 | 0.9512 | 0.8741 | 0.9369 |
|             | SVM     | 0.9539 | 0.9102 | 0.9553 | 0.8664 | 0.9328 |
|             | Bagging | 0.9450 | 0.9265 | 0.9390 | 0.8656 | 0.9328 |
|             | XGBoost | 0.9674 | 0.9143 | 0.9553 | 0.8704 | 0.9348 |
|             | KNN     | 0.9310 | 0.9061 | 0.9553 | 0.8625 | 0.9308 |
|             | Dtree   | 0.9205 | 0.9061 | 0.9350 | 0.8415 | 0.9206 |
|             | NB      | 0.9403 | 0.8857 | 0.9553 | 0.8431 | 0.9206 |
| HLA-A*30:01 | LR      | 0.7359 | 0.6923 | 0.7750 | 0.4691 | 0.7342 |
|             | SVM     | 0.7429 | 0.8205 | 0.5750 | 0.4074 | 0.6962 |
|             | Bagging | 0.7231 | 0.7692 | 0.6250 | 0.3981 | 0.6962 |
|             | XGBoost | 0.6952 | 0.7436 | 0.7500 | 0.4936 | 0.7468 |
|             | KNN     | 0.6962 | 0.8205 | 0.5750 | 0.4074 | 0.6962 |
|             | Dtree   | 0.6846 | 0.7692 | 0.6000 | 0.3743 | 0.6835 |
|             | NB      | 0.8038 | 0.8718 | 0.4500 | 0.3541 | 0.6582 |
| HLA-A*30:02 | LR      | 0.9446 | 0.9437 | 0.9028 | 0.8469 | 0.9231 |
|             | SVM     | 0.9480 | 0.9296 | 0.9167 | 0.8462 | 0.9231 |

|             |         |        |        |        |        |        |
|-------------|---------|--------|--------|--------|--------|--------|
|             | Bagging | 0.9415 | 0.8873 | 0.9167 | 0.8045 | 0.9021 |
|             | XGBoost | 0.9577 | 0.9014 | 0.9444 | 0.8468 | 0.9231 |
|             | KNN     | 0.9332 | 0.9437 | 0.9167 | 0.8605 | 0.9301 |
|             | Dtree   | 0.9303 | 0.9577 | 0.9028 | 0.8615 | 0.9301 |
|             | NB      | 0.9487 | 0.9577 | 0.9028 | 0.8615 | 0.9301 |
| HLA-A*31:01 | LR      | 0.9680 | 0.9447 | 0.8941 | 0.8397 | 0.9193 |
|             | SVM     | 0.9333 | 0.8340 | 0.8602 | 0.6945 | 0.8471 |
|             | Bagging | 0.4349 | 0.3489 | 0.9915 | 0.4447 | 0.6709 |
|             | XGBoost | 0.9600 | 0.9234 | 0.9237 | 0.8471 | 0.9236 |
|             | KNN     | 0.8907 | 0.8000 | 0.9364 | 0.7436 | 0.8684 |
|             | Dtree   | 0.9108 | 0.9106 | 0.9110 | 0.8217 | 0.9108 |
|             | NB      | 0.9652 | 0.8596 | 0.9492 | 0.8121 | 0.9045 |
| HLA-A*32:01 | LR      | 0.9366 | 0.8783 | 0.9224 | 0.8016 | 0.9004 |
|             | SVM     | 0.9340 | 0.8783 | 0.9224 | 0.8016 | 0.9004 |
|             | Bagging | 0.9070 | 0.8870 | 0.8707 | 0.7577 | 0.8788 |
|             | XGBoost | 0.9273 | 0.8783 | 0.9397 | 0.8196 | 0.9091 |
|             | KNN     | 0.9095 | 0.8783 | 0.9310 | 0.8106 | 0.9048 |
|             | Dtree   | 0.9046 | 0.8609 | 0.9483 | 0.8125 | 0.9048 |
|             | NB      | 0.8957 | 0.8870 | 0.9052 | 0.7923 | 0.8961 |
| HLA-A*33:01 | LR      | 0.9765 | 1.0000 | 0.9242 | 0.9267 | 0.9620 |
|             | SVM     | 0.9824 | 1.0000 | 0.9242 | 0.9267 | 0.9620 |
|             | Bagging | 0.9598 | 0.9847 | 0.9167 | 0.9033 | 0.9506 |
|             | XGBoost | 0.9769 | 1.0000 | 0.9015 | 0.9056 | 0.9506 |
|             | KNN     | 0.9613 | 1.0000 | 0.9242 | 0.9267 | 0.9620 |
|             | Dtree   | 0.9545 | 1.0000 | 0.9091 | 0.9126 | 0.9544 |
|             | NB      | 0.9643 | 0.9924 | 0.9242 | 0.9185 | 0.9582 |
| HLA-A*68:01 | LR      | 0.9845 | 0.8056 | 0.9751 | 0.7922 | 0.8904 |
|             | SVM     | 0.9551 | 0.9639 | 0.9335 | 0.8978 | 0.9487 |
|             | Bagging | 0.9579 | 0.9611 | 0.9335 | 0.8949 | 0.9473 |
|             | XGBoost | 0.9686 | 0.9694 | 0.9252 | 0.8955 | 0.9473 |
|             | KNN     | 0.9494 | 0.9528 | 0.9335 | 0.8864 | 0.9431 |
|             | Dtree   | 0.9265 | 0.9361 | 0.9169 | 0.8531 | 0.9265 |
|             | NB      | 0.9261 | 0.9639 | 0.9335 | 0.8978 | 0.9487 |
| HLA-A*68:02 | LR      | 0.9425 | 0.9109 | 0.9079 | 0.8188 | 0.9094 |
|             | SVM     | 0.9436 | 0.9010 | 0.9046 | 0.8056 | 0.9028 |
|             | Bagging | 0.8845 | 0.8713 | 0.8947 | 0.7663 | 0.8830 |
|             | XGBoost | 0.9395 | 0.8746 | 0.9079 | 0.7829 | 0.8913 |
|             | KNN     | 0.8992 | 0.8977 | 0.9079 | 0.8056 | 0.9028 |
|             | Dtree   | 0.8798 | 0.8977 | 0.8618 | 0.7600 | 0.8797 |
|             | NB      | 0.8889 | 0.9076 | 0.8980 | 0.8056 | 0.9028 |
| HLA-A*69:01 | LR      | 0.9815 | 0.9600 | 0.9231 | 0.8831 | 0.9412 |
|             | SVM     | 0.9523 | 0.9600 | 0.9231 | 0.8831 | 0.9412 |
|             | Bagging | 0.9415 | 0.9600 | 0.9231 | 0.8831 | 0.9412 |
|             | XGBoost | 0.9415 | 0.9600 | 0.9231 | 0.8831 | 0.9412 |

|             |         |        |        |        |        |        |
|-------------|---------|--------|--------|--------|--------|--------|
|             | KNN     | 0.9415 | 0.9600 | 0.9231 | 0.8831 | 0.9412 |
|             | Dtree   | 0.9415 | 0.9600 | 0.9231 | 0.8831 | 0.9412 |
|             | NB      | 0.9600 | 1.0000 | 0.9231 | 0.9245 | 0.9608 |
| HLA-B*07:02 | LR      | 0.9727 | 0.9757 | 0.9423 | 0.9185 | 0.9590 |
|             | SVM     | 0.9854 | 0.9720 | 0.9590 | 0.9311 | 0.9655 |
|             | Bagging | 0.9738 | 0.9776 | 0.9497 | 0.9277 | 0.9637 |
|             | XGBoost | 0.9847 | 0.9664 | 0.9534 | 0.9199 | 0.9599 |
|             | KNN     | 0.9671 | 0.9683 | 0.9572 | 0.9255 | 0.9627 |
|             | Dtree   | 0.9543 | 0.9552 | 0.9534 | 0.9087 | 0.9543 |
|             | NB      | 0.9573 | 0.9832 | 0.9367 | 0.9209 | 0.9599 |
| HLA-B*08:01 | LR      | 0.8745 | 0.8986 | 0.9429 | 0.8425 | 0.9209 |
|             | SVM     | 0.9391 | 0.8986 | 0.9286 | 0.8276 | 0.9137 |
|             | Bagging | 0.9484 | 0.9420 | 0.8571 | 0.8017 | 0.8993 |
|             | XGBoost | 0.9177 | 0.8841 | 0.8714 | 0.7555 | 0.8777 |
|             | KNN     | 0.9068 | 0.9710 | 0.8571 | 0.8330 | 0.9137 |
|             | Dtree   | 0.8996 | 0.9420 | 0.8571 | 0.8017 | 0.8993 |
|             | NB      | 0.9021 | 0.9710 | 0.7714 | 0.7568 | 0.8705 |
| HLA-B*13:02 | LR      | 0.9870 | 0.9048 | 0.9545 | 0.8612 | 0.9302 |
|             | SVM     | 0.9567 | 1.0000 | 0.9545 | 0.9545 | 0.9767 |
|             | Bagging | 0.9773 | 1.0000 | 0.9545 | 0.9545 | 0.9767 |
|             | XGBoost | 0.9297 | 0.9048 | 0.9545 | 0.8612 | 0.9302 |
|             | KNN     | 0.9773 | 1.0000 | 0.9545 | 0.9545 | 0.9767 |
|             | Dtree   | 0.9297 | 0.9048 | 0.9545 | 0.8612 | 0.9302 |
|             | NB      | 0.9697 | 0.9524 | 0.9545 | 0.9069 | 0.9535 |
| HLA-B*14:02 | LR      | 0.9282 | 0.9744 | 0.9000 | 0.8760 | 0.9367 |
|             | SVM     | 0.9250 | 0.9744 | 0.9000 | 0.8760 | 0.9367 |
|             | Bagging | 0.8962 | 0.8974 | 0.8250 | 0.7238 | 0.8608 |
|             | XGBoost | 0.9391 | 0.8974 | 0.8250 | 0.7238 | 0.8608 |
|             | KNN     | 0.9333 | 0.9744 | 0.9000 | 0.8760 | 0.9367 |
|             | Dtree   | 0.8612 | 0.8974 | 0.8250 | 0.7238 | 0.8608 |
|             | NB      | 0.9141 | 0.9744 | 0.9000 | 0.8760 | 0.9367 |
| HLA-B*15:01 | LR      | 0.9808 | 0.9670 | 0.9444 | 0.9116 | 0.9557 |
|             | SVM     | 0.9780 | 0.9635 | 0.9479 | 0.9115 | 0.9557 |
|             | Bagging | 0.8142 | 0.9983 | 0.5885 | 0.6431 | 0.7932 |
|             | XGBoost | 0.8845 | 0.9722 | 0.6632 | 0.6679 | 0.8175 |
|             | KNN     | 0.9529 | 0.9600 | 0.9427 | 0.9028 | 0.9513 |
|             | Dtree   | 0.7835 | 0.5878 | 0.9792 | 0.6163 | 0.7837 |
|             | NB      | 0.9405 | 0.9617 | 0.9479 | 0.9097 | 0.9548 |
| HLA-B*18:01 | LR      | 0.9889 | 1.0000 | 0.9070 | 0.9100 | 0.9529 |
|             | SVM     | 0.9601 | 1.0000 | 0.9070 | 0.9100 | 0.9529 |
|             | Bagging | 0.9635 | 1.0000 | 0.9070 | 0.9100 | 0.9529 |
|             | XGBoost | 0.9745 | 1.0000 | 0.9070 | 0.9100 | 0.9529 |
|             | KNN     | 0.9480 | 1.0000 | 0.9070 | 0.9100 | 0.9529 |
|             | Dtree   | 0.9419 | 1.0000 | 0.8837 | 0.8887 | 0.9412 |



|             |         |        |        |        |        |        |
|-------------|---------|--------|--------|--------|--------|--------|
| HLA-B*27:01 | NB      | 0.9286 | 1.0000 | 0.9070 | 0.9100 | 0.9529 |
|             | LR      | 0.9833 | 1.0000 | 0.9788 | 0.9790 | 0.9894 |
|             | SVM     | 0.9967 | 1.0000 | 0.9788 | 0.9790 | 0.9894 |
|             | Bagging | 0.9894 | 0.9947 | 0.9788 | 0.9736 | 0.9867 |
|             | XGBoost | 0.9984 | 1.0000 | 0.9788 | 0.9790 | 0.9894 |
|             | KNN     | 0.9894 | 1.0000 | 0.9788 | 0.9790 | 0.9894 |
|             | Dtree   | 0.9682 | 0.9787 | 0.9577 | 0.9366 | 0.9682 |
| HLA-B*27:02 | NB      | 0.9894 | 1.0000 | 0.9788 | 0.9790 | 0.9894 |
|             | LR      | 0.9953 | 0.9613 | 0.9945 | 0.9564 | 0.9780 |
|             | SVM     | 0.9934 | 0.9779 | 0.9945 | 0.9726 | 0.9862 |
|             | Bagging | 0.9831 | 0.9724 | 0.9945 | 0.9672 | 0.9835 |
|             | XGBoost | 0.9904 | 0.9724 | 0.9945 | 0.9672 | 0.9835 |
|             | KNN     | 0.9861 | 0.9779 | 0.9945 | 0.9726 | 0.9862 |
|             | Dtree   | 0.9779 | 0.9724 | 0.9835 | 0.9560 | 0.9780 |
| HLA-B*27:03 | NB      | 0.9791 | 0.9724 | 0.9945 | 0.9672 | 0.9835 |
|             | LR      | 0.9765 | 0.9574 | 0.9792 | 0.9370 | 0.9684 |
|             | SVM     | 0.9721 | 0.9574 | 0.9792 | 0.9370 | 0.9684 |
|             | Bagging | 0.9676 | 0.9574 | 0.9792 | 0.9370 | 0.9684 |
|             | XGBoost | 0.9898 | 0.9574 | 0.9792 | 0.9370 | 0.9684 |
|             | KNN     | 0.9679 | 0.9574 | 0.9792 | 0.9370 | 0.9684 |
|             | Dtree   | 0.9683 | 0.9574 | 0.9792 | 0.9370 | 0.9684 |
| HLA-B*27:04 | NB      | 0.9517 | 0.9574 | 0.9792 | 0.9370 | 0.9684 |
|             | LR      | 0.9822 | 0.9167 | 1.0000 | 0.9204 | 0.9587 |
|             | SVM     | 0.9962 | 0.9167 | 1.0000 | 0.9204 | 0.9587 |
|             | Bagging | 0.9507 | 0.9333 | 0.9016 | 0.8352 | 0.9174 |
|             | XGBoost | 0.9683 | 0.9333 | 1.0000 | 0.9359 | 0.9669 |
|             | KNN     | 0.9667 | 0.9167 | 1.0000 | 0.9204 | 0.9587 |
|             | Dtree   | 0.9667 | 0.9333 | 1.0000 | 0.9359 | 0.9669 |
| HLA-B*27:05 | NB      | 0.9787 | 0.9333 | 1.0000 | 0.9359 | 0.9669 |
|             | LR      | 0.8951 | 0.7656 | 0.9005 | 0.6722 | 0.8331 |
|             | SVM     | 0.8452 | 0.7894 | 0.8563 | 0.6472 | 0.8229 |
|             | Bagging | 0.8199 | 0.7633 | 0.8790 | 0.6466 | 0.8212 |
|             | XGBoost | 0.8115 | 0.7712 | 0.8778 | 0.6528 | 0.8246 |
|             | KNN     | 0.8162 | 0.8562 | 0.7749 | 0.6331 | 0.8155 |
|             | Dtree   | 0.8206 | 0.7882 | 0.8529 | 0.6425 | 0.8206 |
| HLA-B*27:06 | NB      | 0.8971 | 0.8041 | 0.8371 | 0.6415 | 0.8206 |
|             | LR      | 0.9318 | 0.9400 | 0.9804 | 0.9215 | 0.9604 |
|             | SVM     | 0.9706 | 0.9400 | 0.9020 | 0.8423 | 0.9208 |
|             | Bagging | 0.9688 | 0.9600 | 0.9804 | 0.9408 | 0.9703 |
|             | XGBoost | 0.9902 | 0.9600 | 0.9412 | 0.9012 | 0.9505 |
|             | KNN     | 0.9078 | 0.9400 | 0.8627 | 0.8046 | 0.9010 |
|             | Dtree   | 0.9506 | 0.9600 | 0.9412 | 0.9012 | 0.9505 |
| HLA-B*27:07 | NB      | 0.9388 | 0.9400 | 0.9804 | 0.9215 | 0.9604 |
|             | LR      | 0.9975 | 0.9904 | 0.9905 | 0.9809 | 0.9904 |

|             |         |        |        |        |        |        |
|-------------|---------|--------|--------|--------|--------|--------|
|             | SVM     | 0.9983 | 1.0000 | 0.9905 | 0.9905 | 0.9952 |
|             | Bagging | 0.9950 | 0.9904 | 0.9905 | 0.9809 | 0.9904 |
|             | XGBoost | 0.9989 | 1.0000 | 0.9905 | 0.9905 | 0.9952 |
|             | KNN     | 0.9950 | 1.0000 | 0.9905 | 0.9905 | 0.9952 |
|             | Dtree   | 0.9952 | 1.0000 | 0.9905 | 0.9905 | 0.9952 |
|             | NB      | 0.9918 | 1.0000 | 0.9905 | 0.9905 | 0.9952 |
| HLA-B*27:08 | LR      | 0.9993 | 1.0000 | 0.9626 | 0.9631 | 0.9812 |
|             | SVM     | 0.9952 | 1.0000 | 0.9533 | 0.9541 | 0.9765 |
|             | Bagging | 0.9901 | 1.0000 | 0.9533 | 0.9541 | 0.9765 |
|             | XGBoost | 0.9746 | 0.9906 | 0.9252 | 0.9175 | 0.9577 |
|             | KNN     | 0.9760 | 1.0000 | 0.9533 | 0.9541 | 0.9765 |
|             | Dtree   | 0.9813 | 1.0000 | 0.9626 | 0.9631 | 0.9812 |
|             | NB      | 0.9660 | 0.9717 | 0.9533 | 0.9251 | 0.9624 |
| HLA-B*27:09 | LR      | 0.9512 | 0.9682 | 0.9050 | 0.8748 | 0.9365 |
|             | SVM     | 0.7855 | 0.9909 | 0.6833 | 0.7082 | 0.8367 |
|             | Bagging | 0.7258 | 0.9727 | 0.4570 | 0.5012 | 0.7143 |
|             | XGBoost | 0.8691 | 0.9727 | 0.4570 | 0.5012 | 0.7143 |
|             | KNN     | 0.6541 | 0.4136 | 0.7919 | 0.2220 | 0.6032 |
|             | Dtree   | 0.5814 | 0.9955 | 0.1674 | 0.2902 | 0.5805 |
|             | NB      | 0.6447 | 1.0000 | 0.1267 | 0.2598 | 0.5624 |
| HLA-B*35:01 | LR      | 0.9406 | 0.9247 | 0.9429 | 0.8678 | 0.9338 |
|             | SVM     | 0.9602 | 0.9355 | 0.9357 | 0.8712 | 0.9356 |
|             | Bagging | 0.9461 | 0.9247 | 0.9429 | 0.8678 | 0.9338 |
|             | XGBoost | 0.9636 | 0.9355 | 0.9214 | 0.8570 | 0.9284 |
|             | KNN     | 0.9406 | 0.9247 | 0.9429 | 0.8678 | 0.9338 |
|             | Dtree   | 0.9195 | 0.9462 | 0.8929 | 0.8402 | 0.9195 |
|             | NB      | 0.9280 | 0.9391 | 0.9393 | 0.8784 | 0.9392 |
| HLA-B*35:03 | LR      | 0.9800 | 0.9592 | 0.9600 | 0.9192 | 0.9596 |
|             | SVM     | 0.9833 | 0.9592 | 0.9600 | 0.9192 | 0.9596 |
|             | Bagging | 0.9669 | 0.9592 | 0.9600 | 0.9192 | 0.9596 |
|             | XGBoost | 0.7898 | 0.9796 | 0.6000 | 0.6248 | 0.7879 |
|             | KNN     | 0.9698 | 0.9796 | 0.9600 | 0.9396 | 0.9697 |
|             | Dtree   | 0.9596 | 0.9592 | 0.9600 | 0.9192 | 0.9596 |
|             | NB      | 0.9629 | 0.9796 | 0.9400 | 0.9200 | 0.9596 |
| HLA-B*35:08 | LR      | 0.9820 | 0.9565 | 1.0000 | 0.9579 | 0.9785 |
|             | SVM     | 0.9787 | 0.9565 | 1.0000 | 0.9579 | 0.9785 |
|             | Bagging | 0.9822 | 0.9565 | 1.0000 | 0.9579 | 0.9785 |
|             | XGBoost | 0.9919 | 0.9565 | 1.0000 | 0.9579 | 0.9785 |
|             | KNN     | 0.9850 | 0.9565 | 1.0000 | 0.9579 | 0.9785 |
|             | Dtree   | 0.9676 | 0.9565 | 0.9787 | 0.9357 | 0.9677 |
|             | NB      | 0.9792 | 0.9565 | 1.0000 | 0.9579 | 0.9785 |
| HLA-B*37:01 | LR      | 0.9983 | 0.9259 | 0.9878 | 0.9158 | 0.9571 |
|             | SVM     | 0.9889 | 0.9877 | 0.9878 | 0.9755 | 0.9877 |
|             | Bagging | 0.9766 | 0.9383 | 0.9512 | 0.8896 | 0.9448 |

|             |         |        |        |        |        |        |
|-------------|---------|--------|--------|--------|--------|--------|
|             | XGBoost | 0.9925 | 0.9506 | 0.9878 | 0.9393 | 0.9693 |
|             | KNN     | 0.9569 | 0.9259 | 0.9878 | 0.9158 | 0.9571 |
|             | Dtree   | 0.9447 | 0.9383 | 0.9512 | 0.8896 | 0.9448 |
|             | NB      | 0.9971 | 0.9506 | 0.9634 | 0.9142 | 0.9571 |
| HLA-B*39:01 | LR      | 0.9992 | 1.0000 | 0.9808 | 0.9808 | 0.9903 |
|             | SVM     | 0.9917 | 1.0000 | 0.9808 | 0.9808 | 0.9903 |
|             | Bagging | 0.9783 | 0.9608 | 0.9808 | 0.9419 | 0.9709 |
|             | XGBoost | 0.9708 | 0.9608 | 0.9808 | 0.9419 | 0.9709 |
|             | KNN     | 0.9998 | 1.0000 | 0.9808 | 0.9808 | 0.9903 |
|             | Dtree   | 0.9904 | 1.0000 | 0.9808 | 0.9808 | 0.9903 |
|             | NB      | 0.9808 | 1.0000 | 0.9808 | 0.9808 | 0.9903 |
| HLA-B*40:01 | LR      | 0.9937 | 0.9690 | 0.9604 | 0.9294 | 0.9647 |
|             | SVM     | 0.9850 | 0.9690 | 0.9648 | 0.9338 | 0.9669 |
|             | Bagging | 0.9719 | 0.9513 | 0.9604 | 0.9117 | 0.9558 |
|             | XGBoost | 0.9929 | 0.9646 | 0.9648 | 0.9294 | 0.9647 |
|             | KNN     | 0.9673 | 0.9735 | 0.9604 | 0.9339 | 0.9669 |
|             | Dtree   | 0.9647 | 0.9690 | 0.9604 | 0.9294 | 0.9647 |
|             | NB      | 0.9619 | 0.9735 | 0.9604 | 0.9339 | 0.9669 |
| HLA-B*40:02 | LR      | 0.9766 | 0.9780 | 0.9643 | 0.9423 | 0.9711 |
|             | SVM     | 0.9837 | 0.9780 | 0.9643 | 0.9423 | 0.9711 |
|             | Bagging | 0.9744 | 0.9780 | 0.9505 | 0.9288 | 0.9642 |
|             | XGBoost | 0.9886 | 0.9780 | 0.9643 | 0.9423 | 0.9711 |
|             | KNN     | 0.9728 | 0.9780 | 0.9643 | 0.9423 | 0.9711 |
|             | Dtree   | 0.9615 | 0.9752 | 0.9478 | 0.9233 | 0.9615 |
|             | NB      | 0.9582 | 0.9752 | 0.9670 | 0.9423 | 0.9711 |
| HLA-B*41:01 | LR      | 0.9375 | 0.9375 | 1.0000 | 0.9410 | 0.9697 |
|             | SVM     | 0.9522 | 0.9375 | 1.0000 | 0.9410 | 0.9697 |
|             | Bagging | 0.9596 | 0.9375 | 1.0000 | 0.9410 | 0.9697 |
|             | XGBoost | 0.9926 | 0.9375 | 1.0000 | 0.9410 | 0.9697 |
|             | KNN     | 0.9669 | 0.9375 | 1.0000 | 0.9410 | 0.9697 |
|             | Dtree   | 0.9688 | 0.9375 | 1.0000 | 0.9410 | 0.9697 |
|             | NB      | 0.9449 | 0.9375 | 1.0000 | 0.9410 | 0.9697 |
| HLA-B*44:02 | LR      | 0.9689 | 0.9515 | 0.9564 | 0.9079 | 0.9539 |
|             | SVM     | 0.9767 | 0.9539 | 0.9540 | 0.9079 | 0.9539 |
|             | Bagging | 0.9624 | 0.9417 | 0.9564 | 0.8983 | 0.9491 |
|             | XGBoost | 0.9848 | 0.9539 | 0.9540 | 0.9079 | 0.9539 |
|             | KNN     | 0.9634 | 0.9539 | 0.9540 | 0.9079 | 0.9539 |
|             | Dtree   | 0.9491 | 0.9417 | 0.9564 | 0.8983 | 0.9491 |
|             | NB      | 0.9453 | 0.9539 | 0.9540 | 0.9079 | 0.9539 |
| HLA-B*44:03 | LR      | 0.9887 | 0.9725 | 0.9753 | 0.9479 | 0.9739 |
|             | SVM     | 0.9802 | 0.9615 | 0.9836 | 0.9454 | 0.9726 |
|             | Bagging | 0.9698 | 0.9725 | 0.9671 | 0.9397 | 0.9698 |
|             | XGBoost | 0.9922 | 0.9808 | 0.9753 | 0.9561 | 0.9781 |
|             | KNN     | 0.9747 | 0.9670 | 0.9781 | 0.9452 | 0.9726 |

|             |         |        |        |        |        |        |
|-------------|---------|--------|--------|--------|--------|--------|
|             | Dtree   | 0.9698 | 0.9725 | 0.9671 | 0.9397 | 0.9698 |
|             | NB      | 0.9623 | 0.9670 | 0.9781 | 0.9452 | 0.9726 |
| HLA-B*44:27 | LR      | 1.0000 | 1.0000 | 1.0000 | 1.0000 | 1.0000 |
|             | SVM     | 1.0000 | 1.0000 | 1.0000 | 1.0000 | 1.0000 |
|             | Bagging | 1.0000 | 1.0000 | 1.0000 | 1.0000 | 1.0000 |
|             | XGBoost | 1.0000 | 1.0000 | 1.0000 | 1.0000 | 1.0000 |
|             | KNN     | 1.0000 | 1.0000 | 1.0000 | 1.0000 | 1.0000 |
|             | Dtree   | 1.0000 | 1.0000 | 1.0000 | 1.0000 | 1.0000 |
|             | NB      | 1.0000 | 1.0000 | 1.0000 | 1.0000 | 1.0000 |
| HLA-B*45:01 | LR      | 0.9594 | 0.9352 | 0.9541 | 0.8895 | 0.9447 |
|             | SVM     | 0.9743 | 0.9352 | 0.9633 | 0.8989 | 0.9493 |
|             | Bagging | 0.9427 | 0.9259 | 0.9450 | 0.8711 | 0.9355 |
|             | XGBoost | 0.9803 | 0.9444 | 0.8624 | 0.8093 | 0.9032 |
|             | KNN     | 0.9569 | 0.9352 | 0.9633 | 0.8989 | 0.9493 |
|             | Dtree   | 0.9354 | 0.9259 | 0.9450 | 0.8711 | 0.9355 |
|             | NB      | 0.9542 | 0.9352 | 0.9633 | 0.8989 | 0.9493 |
| HLA-B*46:01 | LR      | 0.9154 | 0.8947 | 0.9481 | 0.8442 | 0.9216 |
|             | SVM     | 0.9098 | 0.9211 | 0.9351 | 0.8563 | 0.9281 |
|             | Bagging | 0.9183 | 0.7763 | 0.9481 | 0.7359 | 0.8627 |
|             | XGBoost | 0.9578 | 0.7763 | 0.9481 | 0.7359 | 0.8627 |
|             | KNN     | 0.9009 | 0.8421 | 0.9351 | 0.7809 | 0.8889 |
|             | Dtree   | 0.9214 | 0.8947 | 0.9481 | 0.8442 | 0.9216 |
|             | NB      | 0.9142 | 0.8947 | 0.9481 | 0.8442 | 0.9216 |
| HLA-B*49:01 | LR      | 0.9792 | 0.9813 | 0.9444 | 0.9262 | 0.9628 |
|             | SVM     | 0.9713 | 0.9813 | 0.9444 | 0.9262 | 0.9628 |
|             | Bagging | 0.9619 | 0.9907 | 0.9259 | 0.9183 | 0.9581 |
|             | XGBoost | 0.9596 | 0.9720 | 0.9352 | 0.9076 | 0.9535 |
|             | KNN     | 0.9618 | 0.9813 | 0.9444 | 0.9262 | 0.9628 |
|             | Dtree   | 0.9582 | 0.9720 | 0.9444 | 0.9166 | 0.9581 |
|             | NB      | 0.9630 | 0.9813 | 0.9444 | 0.9262 | 0.9628 |
| HLA-B*50:01 | LR      | 0.9746 | 0.9535 | 0.9545 | 0.9080 | 0.9540 |
|             | SVM     | 0.9715 | 0.9535 | 0.9545 | 0.9080 | 0.9540 |
|             | Bagging | 0.9752 | 0.9535 | 0.9545 | 0.9080 | 0.9540 |
|             | XGBoost | 0.9797 | 0.9535 | 0.9545 | 0.9080 | 0.9540 |
|             | KNN     | 0.9635 | 0.9535 | 0.9545 | 0.9080 | 0.9540 |
|             | Dtree   | 0.9656 | 0.9767 | 0.9545 | 0.9313 | 0.9655 |
|             | NB      | 0.9197 | 0.9535 | 0.9545 | 0.9080 | 0.9540 |
| HLA-B*51:01 | LR      | 0.9363 | 0.9024 | 0.9697 | 0.8743 | 0.9362 |
|             | SVM     | 0.9652 | 0.9024 | 0.9636 | 0.8678 | 0.9331 |
|             | Bagging | 0.9551 | 0.9207 | 0.9394 | 0.8603 | 0.9301 |
|             | XGBoost | 0.9205 | 0.8841 | 0.9515 | 0.8377 | 0.9179 |
|             | KNN     | 0.9355 | 0.8841 | 0.9636 | 0.8506 | 0.9240 |
|             | Dtree   | 0.9362 | 0.9573 | 0.9152 | 0.8731 | 0.9362 |
|             | NB      | 0.9683 | 0.9024 | 0.9636 | 0.8678 | 0.9331 |

|             |         |        |        |        |        |        |
|-------------|---------|--------|--------|--------|--------|--------|
| HLA-B*53:01 | LR      | 0.9463 | 0.8983 | 0.9500 | 0.8497 | 0.9244 |
|             | SVM     | 0.9675 | 0.8983 | 0.9667 | 0.8674 | 0.9328 |
|             | Bagging | 0.9301 | 0.9153 | 0.9500 | 0.8660 | 0.9328 |
|             | XGBoost | 0.9089 | 0.9153 | 0.9500 | 0.8660 | 0.9328 |
|             | KNN     | 0.9326 | 0.9153 | 0.9500 | 0.8660 | 0.9328 |
|             | Dtree   | 0.9240 | 0.8814 | 0.9667 | 0.8516 | 0.9244 |
|             | NB      | 0.9112 | 0.8983 | 0.9667 | 0.8674 | 0.9328 |
| HLA-B*54:01 | LR      | 0.9643 | 0.9242 | 0.9552 | 0.8801 | 0.9398 |
|             | SVM     | 0.9683 | 0.9242 | 0.9552 | 0.8801 | 0.9398 |
|             | Bagging | 0.9555 | 0.9242 | 0.9403 | 0.8647 | 0.9323 |
|             | XGBoost | 0.9729 | 0.9242 | 0.9552 | 0.8801 | 0.9398 |
|             | KNN     | 0.8547 | 0.9394 | 0.7164 | 0.6720 | 0.8271 |
|             | Dtree   | 0.9323 | 0.9242 | 0.9403 | 0.8647 | 0.9323 |
|             | NB      | 0.9354 | 0.9394 | 0.9552 | 0.8948 | 0.9474 |
| HLA-B*56:01 | LR      | 1.0000 | 0.8333 | 1.0000 | 0.8468 | 0.9178 |
|             | SVM     | 1.0000 | 0.8056 | 1.0000 | 0.8230 | 0.9041 |
|             | Bagging | 1.0000 | 1.0000 | 1.0000 | 1.0000 | 1.0000 |
|             | XGBoost | 1.0000 | 1.0000 | 1.0000 | 1.0000 | 1.0000 |
|             | KNN     | 1.0000 | 1.0000 | 1.0000 | 1.0000 | 1.0000 |
|             | Dtree   | 1.0000 | 1.0000 | 1.0000 | 1.0000 | 1.0000 |
|             | NB      | 0.9617 | 1.0000 | 0.4324 | 0.5226 | 0.7123 |
| HLA-B*57:01 | LR      | 0.9578 | 0.9350 | 0.9026 | 0.8380 | 0.9188 |
|             | SVM     | 0.9265 | 0.9350 | 0.8831 | 0.8191 | 0.9090 |
|             | Bagging | 0.8316 | 0.9821 | 0.5390 | 0.5811 | 0.7604 |
|             | XGBoost | 0.8383 | 0.9870 | 0.2386 | 0.3401 | 0.6125 |
|             | KNN     | 0.9144 | 0.7707 | 0.9545 | 0.7379 | 0.8627 |
|             | Dtree   | 0.9293 | 0.9171 | 0.9416 | 0.8589 | 0.9293 |
|             | NB      | 0.8623 | 0.9382 | 0.6591 | 0.6219 | 0.7985 |
| HLA-B*57:03 | LR      | 0.9652 | 0.8848 | 0.9541 | 0.8411 | 0.9195 |
|             | SVM     | 0.9279 | 0.6682 | 0.9587 | 0.6555 | 0.8138 |
|             | Bagging | 0.9582 | 0.9401 | 0.9312 | 0.8713 | 0.9356 |
|             | XGBoost | 0.9466 | 0.9539 | 0.9358 | 0.8898 | 0.9448 |
|             | KNN     | 0.9414 | 0.9309 | 0.9495 | 0.8806 | 0.9402 |
|             | Dtree   | 0.9357 | 0.9539 | 0.9174 | 0.8719 | 0.9356 |
|             | NB      | 0.8873 | 0.8249 | 0.9404 | 0.7706 | 0.8828 |
| HLA-B*58:01 | LR      | 0.9274 | 0.9242 | 0.9397 | 0.8641 | 0.9320 |
|             | SVM     | 0.9394 | 0.9141 | 0.9397 | 0.8542 | 0.9270 |
|             | Bagging | 0.9378 | 0.9141 | 0.9296 | 0.8439 | 0.9219 |
|             | XGBoost | 0.9572 | 0.8990 | 0.9296 | 0.8291 | 0.9144 |
|             | KNN     | 0.9356 | 0.9242 | 0.9397 | 0.8641 | 0.9320 |
|             | Dtree   | 0.9042 | 0.8889 | 0.9196 | 0.8089 | 0.9043 |
|             | NB      | 0.9464 | 0.9242 | 0.9397 | 0.8641 | 0.9320 |
| HLA-C*01:02 | LR      | 0.9492 | 0.9390 | 0.8916 | 0.8313 | 0.9152 |
|             | SVM     | 0.9414 | 0.9390 | 0.8916 | 0.8313 | 0.9152 |

|             |         |        |        |        |        |        |
|-------------|---------|--------|--------|--------|--------|--------|
|             | Bagging | 0.9019 | 0.9512 | 0.8675 | 0.8212 | 0.9091 |
|             | XGBoost | 0.9506 | 0.9634 | 0.8554 | 0.8232 | 0.9091 |
|             | KNN     | 0.9174 | 0.9390 | 0.8916 | 0.8313 | 0.9152 |
|             | Dtree   | 0.9092 | 0.9268 | 0.8916 | 0.8188 | 0.9091 |
|             | NB      | 0.9164 | 0.9390 | 0.9036 | 0.8430 | 0.9212 |
| HLA-C*02:02 | LR      | 0.9070 | 0.9187 | 0.9032 | 0.8220 | 0.9109 |
|             | SVM     | 0.9679 | 0.9268 | 0.9032 | 0.8302 | 0.9150 |
|             | Bagging | 0.9170 | 0.9187 | 0.8871 | 0.8061 | 0.9028 |
|             | XGBoost | 0.9579 | 0.9350 | 0.8790 | 0.8151 | 0.9069 |
|             | KNN     | 0.9249 | 0.9268 | 0.9032 | 0.8302 | 0.9150 |
|             | Dtree   | 0.9029 | 0.9187 | 0.8871 | 0.8061 | 0.9028 |
|             | NB      | 0.8859 | 0.9106 | 0.9032 | 0.8138 | 0.9069 |
| HLA-C*03:03 | LR      | 0.9360 | 0.9014 | 0.9722 | 0.8762 | 0.9371 |
|             | SVM     | 0.9435 | 0.9014 | 0.9722 | 0.8762 | 0.9371 |
|             | Bagging | 0.9345 | 0.9014 | 0.9722 | 0.8762 | 0.9371 |
|             | XGBoost | 0.9408 | 0.9014 | 0.9444 | 0.8468 | 0.9231 |
|             | KNN     | 0.9368 | 0.9014 | 0.9722 | 0.8762 | 0.9371 |
|             | Dtree   | 0.9368 | 0.9014 | 0.9722 | 0.8762 | 0.9371 |
|             | NB      | 0.9032 | 0.9014 | 0.9306 | 0.8325 | 0.9161 |
| HLA-C*03:04 | LR      | 0.9661 | 0.8902 | 0.9639 | 0.8567 | 0.9273 |
|             | SVM     | 0.9827 | 0.8902 | 0.9639 | 0.8567 | 0.9273 |
|             | Bagging | 0.9271 | 0.9024 | 0.9518 | 0.8555 | 0.9273 |
|             | XGBoost | 0.9807 | 0.9024 | 0.9518 | 0.8555 | 0.9273 |
|             | KNN     | 0.9270 | 0.8902 | 0.9639 | 0.8567 | 0.9273 |
|             | Dtree   | 0.9271 | 0.9024 | 0.9518 | 0.8555 | 0.9273 |
|             | NB      | 0.9074 | 0.8902 | 0.9639 | 0.8567 | 0.9273 |
| HLA-C*04:01 | LR      | 0.9598 | 0.7619 | 0.9914 | 0.7742 | 0.8769 |
|             | SVM     | 0.8968 | 0.5281 | 0.9914 | 0.5866 | 0.7603 |
|             | Bagging | 0.9195 | 0.8658 | 0.9009 | 0.7672 | 0.8834 |
|             | XGBoost | 0.9583 | 0.6710 | 0.9784 | 0.6828 | 0.8251 |
|             | KNN     | 0.9105 | 0.8398 | 0.9612 | 0.8072 | 0.9006 |
|             | Dtree   | 0.8875 | 0.8225 | 0.9526 | 0.7819 | 0.8877 |
|             | NB      | 0.9231 | 0.6277 | 0.9871 | 0.6591 | 0.8078 |
| HLA-C*05:01 | LR      | 0.9771 | 0.8983 | 0.9832 | 0.8850 | 0.9409 |
|             | SVM     | 0.9290 | 0.9068 | 0.9748 | 0.8838 | 0.9409 |
|             | Bagging | 0.9549 | 0.8983 | 0.9832 | 0.8850 | 0.9409 |
|             | XGBoost | 0.9677 | 0.8983 | 0.9748 | 0.8759 | 0.9367 |
|             | KNN     | 0.9419 | 0.8983 | 0.9832 | 0.8850 | 0.9409 |
|             | Dtree   | 0.9323 | 0.8983 | 0.9664 | 0.8669 | 0.9325 |
|             | NB      | 0.9643 | 0.9068 | 0.9748 | 0.8838 | 0.9409 |
| HLA-C*06:02 | LR      | 0.9427 | 0.9072 | 0.8878 | 0.7951 | 0.8974 |
|             | SVM     | 0.9107 | 0.9072 | 0.8878 | 0.7951 | 0.8974 |
|             | Bagging | 0.8905 | 0.7938 | 0.9082 | 0.7069 | 0.8513 |
|             | XGBoost | 0.9379 | 0.8969 | 0.8878 | 0.7847 | 0.8923 |

|             |         |        |        |        |        |        |
|-------------|---------|--------|--------|--------|--------|--------|
|             | KNN     | 0.8961 | 0.9072 | 0.8878 | 0.7951 | 0.8974 |
|             | Dtree   | 0.8667 | 0.8763 | 0.8571 | 0.7335 | 0.8667 |
|             | NB      | 0.8653 | 0.9072 | 0.8878 | 0.7951 | 0.8974 |
| HLA-C*07:01 | LR      | 0.9764 | 0.9750 | 0.9506 | 0.9258 | 0.9627 |
|             | SVM     | 0.9849 | 0.9750 | 0.9506 | 0.9258 | 0.9627 |
|             | Bagging | 0.9627 | 0.9750 | 0.9506 | 0.9258 | 0.9627 |
|             | XGBoost | 0.9788 | 0.9625 | 0.9506 | 0.9131 | 0.9565 |
|             | KNN     | 0.9563 | 0.9750 | 0.9383 | 0.9137 | 0.9565 |
|             | Dtree   | 0.9504 | 0.9625 | 0.9383 | 0.9009 | 0.9503 |
|             | NB      | 0.9594 | 0.9750 | 0.9506 | 0.9258 | 0.9627 |
| HLA-C*07:02 | LR      | 0.9698 | 0.8909 | 0.9464 | 0.8390 | 0.9189 |
|             | SVM     | 0.9659 | 0.9273 | 0.9286 | 0.8558 | 0.9279 |
|             | Bagging | 0.9153 | 0.8545 | 0.9821 | 0.8444 | 0.9189 |
|             | XGBoost | 0.9696 | 0.8545 | 0.9821 | 0.8444 | 0.9189 |
|             | KNN     | 0.7557 | 0.6364 | 0.8750 | 0.5272 | 0.7568 |
|             | Dtree   | 0.9183 | 0.8545 | 0.9821 | 0.8444 | 0.9189 |
|             | NB      | 0.9347 | 0.6727 | 0.9643 | 0.6672 | 0.8198 |
| HLA-C*07:04 | LR      | 0.9583 | 0.9688 | 0.8485 | 0.8219 | 0.9077 |
|             | SVM     | 0.8845 | 1.0000 | 0.7879 | 0.8040 | 0.8923 |
|             | Bagging | 0.9233 | 0.9688 | 0.8788 | 0.8500 | 0.9231 |
|             | XGBoost | 0.9238 | 0.9688 | 0.8788 | 0.8500 | 0.9231 |
|             | KNN     | 0.8939 | 1.0000 | 0.7879 | 0.8040 | 0.8923 |
|             | Dtree   | 0.9238 | 0.9688 | 0.8788 | 0.8500 | 0.9231 |
|             | NB      | 0.8977 | 0.9375 | 0.8182 | 0.7600 | 0.8769 |
| HLA-C*08:02 | LR      | 0.9787 | 0.9821 | 0.9292 | 0.9124 | 0.9556 |
|             | SVM     | 0.9885 | 0.9732 | 0.9381 | 0.9117 | 0.9556 |
|             | Bagging | 0.9654 | 0.9464 | 0.9558 | 0.9023 | 0.9511 |
|             | XGBoost | 0.9855 | 0.9464 | 0.9469 | 0.8933 | 0.9467 |
|             | KNN     | 0.9632 | 0.9732 | 0.9381 | 0.9117 | 0.9556 |
|             | Dtree   | 0.9556 | 0.9732 | 0.9381 | 0.9117 | 0.9556 |
|             | NB      | 0.9610 | 0.9732 | 0.9381 | 0.9117 | 0.9556 |
| HLA-C*14:02 | LR      | 0.9899 | 0.9531 | 0.9846 | 0.9384 | 0.9690 |
|             | SVM     | 0.9837 | 0.8906 | 0.9846 | 0.8797 | 0.9380 |
|             | Bagging | 0.9714 | 0.4844 | 0.9846 | 0.5429 | 0.7364 |
|             | XGBoost | 0.9645 | 0.4844 | 0.9846 | 0.5429 | 0.7364 |
|             | KNN     | 0.9611 | 0.9375 | 0.9846 | 0.9234 | 0.9612 |
|             | Dtree   | 0.9376 | 0.8906 | 0.9846 | 0.8797 | 0.9380 |
|             | NB      | 0.9825 | 1.0000 | 0.9692 | 0.9695 | 0.9845 |
| HLA-C*16:01 | LR      | 0.9431 | 0.9348 | 0.8511 | 0.7880 | 0.8925 |
|             | SVM     | 0.9047 | 0.8913 | 0.8936 | 0.7849 | 0.8925 |
|             | Bagging | 0.9216 | 0.9348 | 0.8511 | 0.7880 | 0.8925 |
|             | XGBoost | 0.9091 | 0.8913 | 0.8936 | 0.7849 | 0.8925 |
|             | KNN     | 0.9022 | 0.9130 | 0.8936 | 0.8067 | 0.9032 |
|             | Dtree   | 0.9033 | 0.9130 | 0.8936 | 0.8067 | 0.9032 |

|    |             |         |        |        |        |        |        |
|----|-------------|---------|--------|--------|--------|--------|--------|
|    |             | NB      | 0.9239 | 0.9348 | 0.8511 | 0.7880 | 0.8925 |
| 11 | HLA-A*01:01 | LR      | 0.9694 | 0.9740 | 0.9397 | 0.9142 | 0.9568 |
|    |             | SVM     | 0.9813 | 0.9740 | 0.9397 | 0.9142 | 0.9568 |
|    |             | Bagging | 0.9643 | 0.9610 | 0.9440 | 0.9051 | 0.9525 |
|    |             | XGBoost | 0.9864 | 0.9177 | 0.9655 | 0.8844 | 0.9417 |
|    |             | KNN     | 0.9663 | 0.9740 | 0.9440 | 0.9184 | 0.9590 |
|    |             | Dtree   | 0.9503 | 0.9524 | 0.9483 | 0.9007 | 0.9503 |
|    |             | NB      | 0.9302 | 0.9740 | 0.9440 | 0.9184 | 0.9590 |
|    | HLA-A*02:01 | LR      | 0.9305 | 0.9163 | 0.8966 | 0.8131 | 0.9065 |
|    |             | SVM     | 0.9121 | 0.9243 | 0.8887 | 0.8135 | 0.9065 |
|    |             | Bagging | 0.9044 | 0.8466 | 0.9245 | 0.7735 | 0.8856 |
|    |             | XGBoost | 0.9317 | 0.9044 | 0.8887 | 0.7931 | 0.8965 |
|    |             | KNN     | 0.9024 | 0.9223 | 0.8787 | 0.8018 | 0.9005 |
|    |             | Dtree   | 0.8846 | 0.9124 | 0.8569 | 0.7704 | 0.8846 |
|    |             | NB      | 0.9291 | 0.9143 | 0.8986 | 0.8130 | 0.9065 |
|    | HLA-A*02:03 | LR      | 0.8889 | 0.8077 | 0.9630 | 0.7819 | 0.8868 |
|    |             | SVM     | 0.9288 | 0.8462 | 0.9259 | 0.7754 | 0.8868 |
|    |             | Bagging | 0.8803 | 0.8462 | 0.9259 | 0.7754 | 0.8868 |
|    |             | XGBoost | 0.8967 | 0.8077 | 0.9630 | 0.7819 | 0.8868 |
|    |             | KNN     | 0.8839 | 0.8077 | 0.9630 | 0.7819 | 0.8868 |
|    |             | Dtree   | 0.8860 | 0.8462 | 0.9259 | 0.7754 | 0.8868 |
|    |             | NB      | 0.9174 | 0.8077 | 0.9630 | 0.7819 | 0.8868 |
|    | HLA-A*02:04 | LR      | 0.9609 | 0.9655 | 0.9667 | 0.9322 | 0.9661 |
|    |             | SVM     | 0.9747 | 0.9655 | 0.9667 | 0.9322 | 0.9661 |
|    |             | Bagging | 0.9644 | 0.9655 | 0.9333 | 0.8989 | 0.9492 |
|    |             | XGBoost | 0.9891 | 0.9655 | 0.9667 | 0.9322 | 0.9661 |
|    |             | KNN     | 0.9661 | 0.9655 | 0.9667 | 0.9322 | 0.9661 |
|    |             | Dtree   | 0.9494 | 0.9655 | 0.9333 | 0.8989 | 0.9492 |
|    |             | NB      | 0.9483 | 0.9655 | 0.9667 | 0.9322 | 0.9661 |
|    | HLA-A*02:05 | LR      | 0.9804 | 0.9412 | 0.9444 | 0.8856 | 0.9429 |
|    |             | SVM     | 0.9510 | 0.9412 | 0.9444 | 0.8856 | 0.9429 |
|    |             | Bagging | 0.9314 | 0.8824 | 0.9444 | 0.8295 | 0.9143 |
|    |             | XGBoost | 0.9428 | 0.9412 | 0.9444 | 0.8856 | 0.9429 |
|    |             | KNN     | 0.9428 | 0.9412 | 0.9444 | 0.8856 | 0.9429 |
|    |             | Dtree   | 0.9428 | 0.9412 | 0.9444 | 0.8856 | 0.9429 |
|    |             | NB      | 0.9216 | 0.9412 | 0.9444 | 0.8856 | 0.9429 |
|    | HLA-A*02:07 | LR      | 0.9122 | 0.8947 | 0.9351 | 0.8307 | 0.9150 |
|    |             | SVM     | 0.9554 | 0.8947 | 0.9351 | 0.8307 | 0.9150 |
|    |             | Bagging | 0.9505 | 0.8947 | 0.9481 | 0.8442 | 0.9216 |
|    |             | XGBoost | 0.9123 | 0.8947 | 0.9481 | 0.8442 | 0.9216 |
|    |             | KNN     | 0.9176 | 0.8947 | 0.9351 | 0.8307 | 0.9150 |
|    |             | Dtree   | 0.9149 | 0.8947 | 0.9351 | 0.8307 | 0.9150 |
|    |             | NB      | 0.9564 | 0.8947 | 0.9481 | 0.8442 | 0.9216 |
|    | HLA-A*03:01 | LR      | 0.9472 | 0.9394 | 0.9639 | 0.9036 | 0.9517 |



|             |         |        |        |        |        |        |
|-------------|---------|--------|--------|--------|--------|--------|
|             | SVM     | 0.9656 | 0.9515 | 0.9518 | 0.9033 | 0.9517 |
|             | Bagging | 0.9712 | 0.9212 | 0.9639 | 0.8860 | 0.9426 |
|             | XGBoost | 0.9733 | 0.9455 | 0.9578 | 0.9034 | 0.9517 |
|             | KNN     | 0.9612 | 0.9091 | 0.9578 | 0.8681 | 0.9335 |
|             | Dtree   | 0.9335 | 0.9212 | 0.9458 | 0.8673 | 0.9335 |
|             | NB      | 0.9435 | 0.9515 | 0.9518 | 0.9033 | 0.9517 |
| HLA-A*11:01 | LR      | 0.9408 | 0.2532 | 0.9957 | 0.3720 | 0.6253 |
|             | SVM     | 0.9800 | 0.9571 | 0.9786 | 0.9360 | 0.9679 |
|             | Bagging | 0.9722 | 0.7983 | 0.9915 | 0.8052 | 0.8951 |
|             | XGBoost | 0.9796 | 0.9313 | 0.9829 | 0.9155 | 0.9572 |
|             | KNN     | 0.9366 | 0.8884 | 0.9786 | 0.8707 | 0.9336 |
|             | Dtree   | 0.8949 | 0.7983 | 0.9915 | 0.8052 | 0.8951 |
|             | NB      | 0.8842 | 0.9871 | 0.5214 | 0.5743 | 0.7537 |
| HLA-A*23:01 | LR      | 1.0000 | 1.0000 | 1.0000 | 1.0000 | 1.0000 |
|             | SVM     | 1.0000 | 1.0000 | 1.0000 | 1.0000 | 1.0000 |
|             | Bagging | 1.0000 | 1.0000 | 1.0000 | 1.0000 | 1.0000 |
|             | XGBoost | 1.0000 | 1.0000 | 1.0000 | 1.0000 | 1.0000 |
|             | KNN     | 1.0000 | 1.0000 | 1.0000 | 1.0000 | 1.0000 |
|             | Dtree   | 0.9808 | 0.9615 | 1.0000 | 0.9629 | 0.9811 |
|             | NB      | 1.0000 | 1.0000 | 1.0000 | 1.0000 | 1.0000 |
| HLA-A*24:02 | LR      | 0.9947 | 0.9677 | 0.9733 | 0.9410 | 0.9705 |
|             | SVM     | 0.9876 | 0.9677 | 0.9733 | 0.9410 | 0.9705 |
|             | Bagging | 0.9811 | 0.9731 | 0.9733 | 0.9464 | 0.9732 |
|             | XGBoost | 0.9784 | 0.9839 | 0.8824 | 0.8705 | 0.9330 |
|             | KNN     | 0.9716 | 0.9462 | 0.9786 | 0.9254 | 0.9625 |
|             | Dtree   | 0.9732 | 0.9839 | 0.9626 | 0.9466 | 0.9732 |
|             | NB      | 0.9735 | 0.9677 | 0.9733 | 0.9410 | 0.9705 |
| HLA-A*24:06 | LR      | 0.9342 | 0.8421 | 0.9500 | 0.7984 | 0.8974 |
|             | SVM     | 0.9316 | 0.8421 | 0.9500 | 0.7984 | 0.8974 |
|             | Bagging | 0.9092 | 0.8947 | 0.9000 | 0.7947 | 0.8974 |
|             | XGBoost | 0.8763 | 0.8947 | 0.9000 | 0.7947 | 0.8974 |
|             | KNN     | 0.8961 | 0.8421 | 0.9500 | 0.7984 | 0.8974 |
|             | Dtree   | 0.8961 | 0.8421 | 0.9500 | 0.7984 | 0.8974 |
|             | NB      | 0.9395 | 0.8421 | 0.9500 | 0.7984 | 0.8974 |
| HLA-A*29:02 | LR      | 0.9785 | 0.9574 | 0.9579 | 0.9153 | 0.9577 |
|             | SVM     | 0.9823 | 0.9574 | 0.9579 | 0.9153 | 0.9577 |
|             | Bagging | 0.9634 | 0.9468 | 0.9579 | 0.9048 | 0.9524 |
|             | XGBoost | 0.9800 | 0.9468 | 0.9579 | 0.9048 | 0.9524 |
|             | KNN     | 0.9614 | 0.9574 | 0.9684 | 0.9260 | 0.9630 |
|             | Dtree   | 0.9471 | 0.9468 | 0.9474 | 0.8942 | 0.9471 |
|             | NB      | 0.9611 | 0.9574 | 0.9579 | 0.9153 | 0.9577 |
| HLA-A*31:01 | LR      | 0.9421 | 0.9697 | 0.8806 | 0.8532 | 0.9248 |
|             | SVM     | 0.9532 | 0.9848 | 0.8657 | 0.8560 | 0.9248 |
|             | Bagging | 0.9440 | 0.9545 | 0.8955 | 0.8512 | 0.9248 |

|             |         |        |        |        |        |        |
|-------------|---------|--------|--------|--------|--------|--------|
|             | XGBoost | 0.9664 | 0.9545 | 0.8955 | 0.8512 | 0.9248 |
|             | KNN     | 0.9155 | 0.9848 | 0.8507 | 0.8425 | 0.9173 |
|             | Dtree   | 0.9175 | 0.9394 | 0.8955 | 0.8355 | 0.9173 |
|             | NB      | 0.9469 | 0.9545 | 0.8507 | 0.8091 | 0.9023 |
| HLA-A*32:01 | LR      | 0.9745 | 0.9200 | 0.9804 | 0.9025 | 0.9505 |
|             | SVM     | 0.9671 | 0.9200 | 0.9804 | 0.9025 | 0.9505 |
|             | Bagging | 0.9567 | 0.8400 | 0.9804 | 0.8296 | 0.9109 |
|             | XGBoost | 0.9559 | 0.8400 | 0.9412 | 0.7858 | 0.8911 |
|             | KNN     | 0.9502 | 0.9200 | 0.9804 | 0.9025 | 0.9505 |
|             | Dtree   | 0.9402 | 0.9000 | 0.9804 | 0.8839 | 0.9406 |
|             | NB      | 0.9306 | 0.9000 | 0.9412 | 0.8422 | 0.9208 |
| HLA-A*68:01 | LR      | 0.9987 | 1.0000 | 0.9455 | 0.9464 | 0.9725 |
|             | SVM     | 0.9848 | 1.0000 | 0.9455 | 0.9464 | 0.9725 |
|             | Bagging | 0.9727 | 1.0000 | 0.9455 | 0.9464 | 0.9725 |
|             | XGBoost | 0.9985 | 1.0000 | 0.9455 | 0.9464 | 0.9725 |
|             | KNN     | 0.9727 | 1.0000 | 0.9455 | 0.9464 | 0.9725 |
|             | Dtree   | 0.9727 | 1.0000 | 0.9455 | 0.9464 | 0.9725 |
|             | NB      | 0.9904 | 1.0000 | 0.9455 | 0.9464 | 0.9725 |
| HLA-A*68:02 | LR      | 0.9274 | 0.8714 | 0.8592 | 0.7306 | 0.8652 |
|             | SVM     | 0.8740 | 0.8714 | 0.8592 | 0.7306 | 0.8652 |
|             | Bagging | 0.9138 | 0.8143 | 0.9437 | 0.7649 | 0.8794 |
|             | XGBoost | 0.8815 | 0.8571 | 0.8592 | 0.7163 | 0.8582 |
|             | KNN     | 0.8785 | 0.8286 | 0.9296 | 0.7625 | 0.8794 |
|             | Dtree   | 0.8438 | 0.8143 | 0.8732 | 0.6889 | 0.8440 |
|             | NB      | 0.8646 | 0.8571 | 0.9155 | 0.7742 | 0.8865 |
| HLA-B*07:02 | LR      | 0.9830 | 0.9375 | 0.9707 | 0.9087 | 0.9541 |
|             | SVM     | 0.9811 | 0.9228 | 0.9817 | 0.9061 | 0.9523 |
|             | Bagging | 0.9701 | 0.8934 | 0.9927 | 0.8906 | 0.9431 |
|             | XGBoost | 0.9748 | 0.9301 | 0.9670 | 0.8978 | 0.9486 |
|             | KNN     | 0.9633 | 0.9301 | 0.9744 | 0.9055 | 0.9523 |
|             | Dtree   | 0.9541 | 0.9375 | 0.9707 | 0.9087 | 0.9541 |
|             | NB      | 0.9809 | 0.8971 | 0.9927 | 0.8940 | 0.9450 |
| HLA-B*08:01 | LR      | 0.9287 | 0.9697 | 0.8824 | 0.8543 | 0.9254 |
|             | SVM     | 0.9608 | 0.9697 | 0.8824 | 0.8543 | 0.9254 |
|             | Bagging | 0.9385 | 0.9697 | 0.8824 | 0.8543 | 0.9254 |
|             | XGBoost | 0.9234 | 0.9697 | 0.8824 | 0.8543 | 0.9254 |
|             | KNN     | 0.9260 | 0.9697 | 0.8824 | 0.8543 | 0.9254 |
|             | Dtree   | 0.9260 | 0.9697 | 0.8824 | 0.8543 | 0.9254 |
|             | NB      | 0.9314 | 0.9697 | 0.8824 | 0.8543 | 0.9254 |
| HLA-B*15:01 | LR      | 0.9545 | 0.8430 | 0.9866 | 0.8386 | 0.9150 |
|             | SVM     | 0.9560 | 0.8341 | 0.8973 | 0.7329 | 0.8658 |
|             | Bagging | 0.9424 | 0.7892 | 0.9866 | 0.7917 | 0.8881 |
|             | XGBoost | 0.9554 | 0.7668 | 0.9821 | 0.7672 | 0.8747 |
|             | KNN     | 0.8923 | 0.8117 | 0.9866 | 0.8110 | 0.8993 |

|             |         |        |        |        |        |        |
|-------------|---------|--------|--------|--------|--------|--------|
|             | Dtree   | 0.8588 | 0.7444 | 0.9732 | 0.7375 | 0.8591 |
|             | NB      | 0.9258 | 0.7937 | 0.9866 | 0.7955 | 0.8904 |
| HLA-B*27:01 | LR      | 0.9931 | 0.9636 | 0.9910 | 0.9551 | 0.9774 |
|             | SVM     | 0.9923 | 0.9727 | 1.0000 | 0.9732 | 0.9864 |
|             | Bagging | 0.9955 | 0.9727 | 0.9820 | 0.9548 | 0.9774 |
|             | XGBoost | 0.9987 | 0.9727 | 1.0000 | 0.9732 | 0.9864 |
|             | KNN     | 0.9864 | 0.9727 | 1.0000 | 0.9732 | 0.9864 |
|             | Dtree   | 0.9909 | 0.9818 | 1.0000 | 0.9821 | 0.9910 |
|             | NB      | 0.9826 | 0.9727 | 1.0000 | 0.9732 | 0.9864 |
| HLA-B*27:02 | LR      | 0.9942 | 0.9915 | 0.9915 | 0.9830 | 0.9915 |
|             | SVM     | 0.9981 | 0.9915 | 0.9915 | 0.9830 | 0.9915 |
|             | Bagging | 0.9997 | 1.0000 | 0.9831 | 0.9831 | 0.9915 |
|             | XGBoost | 0.9949 | 0.9915 | 0.9746 | 0.9661 | 0.9830 |
|             | KNN     | 0.9912 | 0.9915 | 0.9915 | 0.9830 | 0.9915 |
|             | Dtree   | 0.9915 | 0.9829 | 1.0000 | 0.9831 | 0.9915 |
|             | NB      | 0.9883 | 0.9915 | 0.9915 | 0.9830 | 0.9915 |
| HLA-B*27:03 | LR      | 0.9737 | 1.0000 | 0.9211 | 0.9230 | 0.9600 |
|             | SVM     | 0.9716 | 1.0000 | 0.9474 | 0.9480 | 0.9733 |
|             | Bagging | 1.0000 | 1.0000 | 1.0000 | 1.0000 | 1.0000 |
|             | XGBoost | 1.0000 | 1.0000 | 1.0000 | 1.0000 | 1.0000 |
|             | KNN     | 0.9737 | 1.0000 | 0.9474 | 0.9480 | 0.9733 |
|             | Dtree   | 1.0000 | 1.0000 | 1.0000 | 1.0000 | 1.0000 |
|             | NB      | 1.0000 | 1.0000 | 1.0000 | 1.0000 | 1.0000 |
| HLA-B*27:04 | LR      | 0.9487 | 0.9615 | 0.9630 | 0.9245 | 0.9623 |
|             | SVM     | 0.9872 | 0.9615 | 0.9630 | 0.9245 | 0.9623 |
|             | Bagging | 0.9765 | 0.9615 | 0.9630 | 0.9245 | 0.9623 |
|             | XGBoost | 0.9509 | 0.9615 | 0.9630 | 0.9245 | 0.9623 |
|             | KNN     | 0.9580 | 0.9615 | 0.9630 | 0.9245 | 0.9623 |
|             | Dtree   | 0.9067 | 0.9615 | 0.8519 | 0.8169 | 0.9057 |
|             | NB      | 0.9744 | 0.9615 | 0.9259 | 0.8875 | 0.9434 |
| HLA-B*27:05 | LR      | 0.8716 | 0.7705 | 0.8479 | 0.6203 | 0.8092 |
|             | SVM     | 0.8244 | 0.7774 | 0.8393 | 0.6179 | 0.8084 |
|             | Bagging | 0.8045 | 0.7894 | 0.8154 | 0.6050 | 0.8024 |
|             | XGBoost | 0.8083 | 0.7757 | 0.8427 | 0.6198 | 0.8092 |
|             | KNN     | 0.8064 | 0.7791 | 0.8342 | 0.6142 | 0.8067 |
|             | Dtree   | 0.7896 | 0.7928 | 0.7863 | 0.5791 | 0.7896 |
|             | NB      | 0.7990 | 0.7877 | 0.8239 | 0.6120 | 0.8058 |
| HLA-B*27:06 | LR      | 0.9738 | 1.0000 | 0.9231 | 0.9245 | 0.9608 |
|             | SVM     | 0.9354 | 1.0000 | 0.9231 | 0.9245 | 0.9608 |
|             | Bagging | 0.9808 | 1.0000 | 0.9231 | 0.9245 | 0.9608 |
|             | XGBoost | 0.9662 | 1.0000 | 0.9231 | 0.9245 | 0.9608 |
|             | KNN     | 0.9615 | 1.0000 | 0.9231 | 0.9245 | 0.9608 |
|             | Dtree   | 0.9615 | 1.0000 | 0.9231 | 0.9245 | 0.9608 |
|             | NB      | 0.9862 | 1.0000 | 0.9231 | 0.9245 | 0.9608 |

|             |         |        |        |        |        |        |
|-------------|---------|--------|--------|--------|--------|--------|
| HLA-B*27:07 | LR      | 1.0000 | 1.0000 | 1.0000 | 1.0000 | 1.0000 |
|             | SVM     | 1.0000 | 1.0000 | 1.0000 | 1.0000 | 1.0000 |
|             | Bagging | 1.0000 | 0.9667 | 1.0000 | 0.9675 | 0.9835 |
|             | XGBoost | 1.0000 | 1.0000 | 0.9836 | 0.9836 | 0.9917 |
|             | KNN     | 1.0000 | 1.0000 | 1.0000 | 1.0000 | 1.0000 |
|             | Dtree   | 0.9918 | 1.0000 | 0.9836 | 0.9836 | 0.9917 |
|             | NB      | 1.0000 | 1.0000 | 1.0000 | 1.0000 | 1.0000 |
| HLA-B*27:08 | LR      | 0.9872 | 0.9865 | 1.0000 | 0.9867 | 0.9933 |
|             | SVM     | 0.9935 | 0.9865 | 0.9867 | 0.9732 | 0.9866 |
|             | Bagging | 0.9927 | 0.9865 | 0.9733 | 0.9598 | 0.9799 |
|             | XGBoost | 0.9991 | 0.9865 | 0.9733 | 0.9598 | 0.9799 |
|             | KNN     | 0.9930 | 0.9865 | 1.0000 | 0.9867 | 0.9933 |
|             | Dtree   | 0.9798 | 0.9730 | 0.9867 | 0.9598 | 0.9799 |
|             | NB      | 0.9941 | 0.9865 | 0.9867 | 0.9732 | 0.9866 |
| HLA-B*27:09 | LR      | 0.9683 | 0.9433 | 0.9366 | 0.8799 | 0.9399 |
|             | SVM     | 0.9680 | 0.9433 | 0.9437 | 0.8869 | 0.9435 |
|             | Bagging | 0.9467 | 0.9291 | 0.9366 | 0.8657 | 0.9329 |
|             | XGBoost | 0.9715 | 0.9362 | 0.9507 | 0.8870 | 0.9435 |
|             | KNN     | 0.9366 | 0.9433 | 0.9225 | 0.8659 | 0.9329 |
|             | Dtree   | 0.9116 | 0.8936 | 0.9296 | 0.8238 | 0.9117 |
|             | NB      | 0.9212 | 0.9433 | 0.9296 | 0.8729 | 0.9364 |
| HLA-B*35:01 | LR      | 0.9463 | 0.8450 | 0.9538 | 0.8039 | 0.8996 |
|             | SVM     | 0.6029 | 0.1860 | 1.0000 | 0.3208 | 0.5946 |
|             | Bagging | 0.9463 | 0.9302 | 0.9077 | 0.8381 | 0.9189 |
|             | XGBoost | 0.9465 | 0.8605 | 0.9154 | 0.7771 | 0.8880 |
|             | KNN     | 0.8984 | 0.9302 | 0.8692 | 0.8008 | 0.8996 |
|             | Dtree   | 0.8763 | 0.8372 | 0.9154 | 0.7551 | 0.8764 |
|             | NB      | 0.4409 | 0.1473 | 1.0000 | 0.2825 | 0.5753 |
| HLA-B*35:03 | LR      | 1.0000 | 1.0000 | 1.0000 | 1.0000 | 1.0000 |
|             | SVM     | 1.0000 | 1.0000 | 0.9333 | 0.9344 | 0.9661 |
|             | Bagging | 0.9977 | 0.9655 | 1.0000 | 0.9666 | 0.9831 |
|             | XGBoost | 0.9747 | 1.0000 | 0.9333 | 0.9344 | 0.9661 |
|             | KNN     | 0.9667 | 1.0000 | 0.9333 | 0.9344 | 0.9661 |
|             | Dtree   | 0.9667 | 1.0000 | 0.9333 | 0.9344 | 0.9661 |
|             | NB      | 1.0000 | 0.9655 | 1.0000 | 0.9666 | 0.9831 |
| HLA-B*35:08 | LR      | 0.9683 | 0.9630 | 1.0000 | 0.9642 | 0.9818 |
|             | SVM     | 0.9881 | 0.9630 | 1.0000 | 0.9642 | 0.9818 |
|             | Bagging | 0.9802 | 0.8519 | 1.0000 | 0.8633 | 0.9273 |
|             | XGBoost | 0.9861 | 0.8519 | 1.0000 | 0.8633 | 0.9273 |
|             | KNN     | 0.9815 | 0.9630 | 1.0000 | 0.9642 | 0.9818 |
|             | Dtree   | 0.9259 | 0.8519 | 1.0000 | 0.8633 | 0.9273 |
|             | NB      | 0.9683 | 0.9630 | 1.0000 | 0.9642 | 0.9818 |
| HLA-B*37:01 | LR      | 0.9857 | 0.9286 | 1.0000 | 0.9330 | 0.9655 |
|             | SVM     | 0.9810 | 0.9286 | 1.0000 | 0.9330 | 0.9655 |

|             |         |        |        |        |        |        |
|-------------|---------|--------|--------|--------|--------|--------|
|             | Bagging | 0.9643 | 0.9286 | 1.0000 | 0.9330 | 0.9655 |
|             | XGBoost | 0.9643 | 0.9286 | 1.0000 | 0.9330 | 0.9655 |
|             | KNN     | 0.9643 | 0.9286 | 1.0000 | 0.9330 | 0.9655 |
|             | Dtree   | 0.9643 | 0.9286 | 1.0000 | 0.9330 | 0.9655 |
|             | NB      | 0.9810 | 0.9286 | 1.0000 | 0.9330 | 0.9655 |
| HLA-B*39:01 | LR      | 0.9983 | 1.0000 | 0.9714 | 0.9714 | 0.9855 |
|             | SVM     | 0.9992 | 1.0000 | 0.9714 | 0.9714 | 0.9855 |
|             | Bagging | 0.9710 | 0.9706 | 0.9714 | 0.9420 | 0.9710 |
|             | XGBoost | 0.9857 | 1.0000 | 0.9714 | 0.9714 | 0.9855 |
|             | KNN     | 0.9857 | 1.0000 | 0.9714 | 0.9714 | 0.9855 |
|             | Dtree   | 0.9857 | 1.0000 | 0.9714 | 0.9714 | 0.9855 |
|             | NB      | 0.9983 | 1.0000 | 0.9714 | 0.9714 | 0.9855 |
| HLA-B*40:01 | LR      | 0.9835 | 0.9909 | 0.9820 | 0.9729 | 0.9864 |
|             | SVM     | 0.9921 | 0.9909 | 0.9820 | 0.9729 | 0.9864 |
|             | Bagging | 0.9910 | 0.9909 | 0.9910 | 0.9819 | 0.9910 |
|             | XGBoost | 0.9891 | 0.9909 | 0.9730 | 0.9640 | 0.9819 |
|             | KNN     | 0.9910 | 0.9909 | 0.9910 | 0.9819 | 0.9910 |
|             | Dtree   | 0.9910 | 0.9909 | 0.9910 | 0.9819 | 0.9910 |
|             | NB      | 0.9845 | 0.9909 | 0.9910 | 0.9819 | 0.9910 |
| HLA-B*40:02 | LR      | 0.9919 | 0.9862 | 0.9795 | 0.9657 | 0.9828 |
|             | SVM     | 0.9882 | 0.9862 | 0.9795 | 0.9657 | 0.9828 |
|             | Bagging | 0.9765 | 0.9586 | 0.9726 | 0.9314 | 0.9656 |
|             | XGBoost | 0.9926 | 0.9862 | 0.9726 | 0.9589 | 0.9794 |
|             | KNN     | 0.9712 | 0.9310 | 0.9726 | 0.9045 | 0.9519 |
|             | Dtree   | 0.9760 | 0.9862 | 0.9658 | 0.9521 | 0.9759 |
|             | NB      | 0.9815 | 0.9862 | 0.9795 | 0.9657 | 0.9828 |
| HLA-B*44:02 | LR      | 0.9769 | 0.9412 | 0.9947 | 0.9373 | 0.9680 |
|             | SVM     | 0.9870 | 0.9626 | 0.9734 | 0.9361 | 0.9680 |
|             | Bagging | 0.9767 | 0.9465 | 0.9787 | 0.9258 | 0.9627 |
|             | XGBoost | 0.9859 | 0.9465 | 0.9840 | 0.9313 | 0.9653 |
|             | KNN     | 0.9720 | 0.9626 | 0.9734 | 0.9361 | 0.9680 |
|             | Dtree   | 0.9573 | 0.9519 | 0.9628 | 0.9147 | 0.9573 |
|             | NB      | 0.9671 | 0.9626 | 0.9734 | 0.9361 | 0.9680 |
| HLA-B*44:03 | LR      | 0.9975 | 0.9728 | 0.9932 | 0.9663 | 0.9831 |
|             | SVM     | 0.9949 | 0.9728 | 0.9932 | 0.9663 | 0.9831 |
|             | Bagging | 0.9912 | 0.9728 | 0.9932 | 0.9663 | 0.9831 |
|             | XGBoost | 0.9972 | 0.9728 | 0.9932 | 0.9663 | 0.9831 |
|             | KNN     | 0.9826 | 0.9728 | 0.9932 | 0.9663 | 0.9831 |
|             | Dtree   | 0.9796 | 0.9728 | 0.9865 | 0.9594 | 0.9797 |
|             | NB      | 0.9771 | 0.9728 | 0.9932 | 0.9663 | 0.9831 |
| HLA-B*45:01 | LR      | 0.9788 | 0.9677 | 0.9688 | 0.9365 | 0.9683 |
|             | SVM     | 0.9748 | 0.9355 | 0.9688 | 0.9051 | 0.9524 |
|             | Bagging | 0.9677 | 0.9355 | 1.0000 | 0.9383 | 0.9683 |
|             | XGBoost | 0.9693 | 0.9032 | 0.9688 | 0.8746 | 0.9365 |

|             |         |        |        |        |        |        |
|-------------|---------|--------|--------|--------|--------|--------|
|             | KNN     | 0.9677 | 0.9355 | 1.0000 | 0.9383 | 0.9683 |
|             | Dtree   | 0.9204 | 0.9032 | 0.9375 | 0.8416 | 0.9206 |
|             | NB      | 0.9677 | 0.8387 | 1.0000 | 0.8517 | 0.9206 |
| HLA-B*46:01 | LR      | 0.9532 | 0.8889 | 0.9474 | 0.8387 | 0.9189 |
|             | SVM     | 0.8129 | 0.7222 | 0.7368 | 0.4591 | 0.7297 |
|             | Bagging | 0.9196 | 0.9444 | 0.8947 | 0.8392 | 0.9189 |
|             | XGBoost | 0.9196 | 0.9444 | 0.8947 | 0.8392 | 0.9189 |
|             | KNN     | 0.8348 | 0.7222 | 0.9474 | 0.6901 | 0.8378 |
|             | Dtree   | 0.9196 | 0.9444 | 0.8947 | 0.8392 | 0.9189 |
|             | NB      | 0.9401 | 0.8889 | 0.9474 | 0.8387 | 0.9189 |
| HLA-B*49:01 | LR      | 1.0000 | 1.0000 | 1.0000 | 1.0000 | 1.0000 |
|             | SVM     | 1.0000 | 1.0000 | 1.0000 | 1.0000 | 1.0000 |
|             | Bagging | 1.0000 | 1.0000 | 1.0000 | 1.0000 | 1.0000 |
|             | XGBoost | 1.0000 | 1.0000 | 1.0000 | 1.0000 | 1.0000 |
|             | KNN     | 1.0000 | 1.0000 | 1.0000 | 1.0000 | 1.0000 |
|             | Dtree   | 1.0000 | 1.0000 | 1.0000 | 1.0000 | 1.0000 |
|             | NB      | 1.0000 | 1.0000 | 1.0000 | 1.0000 | 1.0000 |
| HLA-B*51:01 | LR      | 0.9547 | 0.9556 | 0.9670 | 0.9227 | 0.9613 |
|             | SVM     | 0.9709 | 0.9444 | 0.9670 | 0.9118 | 0.9558 |
|             | Bagging | 0.9681 | 0.9333 | 0.9451 | 0.8785 | 0.9392 |
|             | XGBoost | 0.9673 | 0.9556 | 0.9560 | 0.9116 | 0.9558 |
|             | KNN     | 0.9597 | 0.9556 | 0.9670 | 0.9227 | 0.9613 |
|             | Dtree   | 0.9613 | 0.9556 | 0.9670 | 0.9227 | 0.9613 |
|             | NB      | 0.9807 | 0.9444 | 0.9670 | 0.9118 | 0.9558 |
| HLA-B*54:01 | LR      | 0.9602 | 0.9333 | 0.9355 | 0.8688 | 0.9344 |
|             | SVM     | 0.9860 | 0.9333 | 0.9355 | 0.8688 | 0.9344 |
|             | Bagging | 0.9527 | 0.9000 | 0.9355 | 0.8364 | 0.9180 |
|             | XGBoost | 0.9462 | 0.9000 | 0.9355 | 0.8364 | 0.9180 |
|             | KNN     | 0.9478 | 0.9333 | 0.9355 | 0.8688 | 0.9344 |
|             | Dtree   | 0.9172 | 0.8667 | 0.9677 | 0.8398 | 0.9180 |
|             | NB      | 0.9892 | 0.9333 | 0.9355 | 0.8688 | 0.9344 |
| HLA-B*56:01 | LR      | 1.0000 | 0.3750 | 1.0000 | 0.4859 | 0.6970 |
|             | SVM     | 1.0000 | 1.0000 | 1.0000 | 1.0000 | 1.0000 |
|             | Bagging | 0.9375 | 0.8125 | 1.0000 | 0.8310 | 0.9091 |
|             | XGBoost | 0.9063 | 0.8125 | 1.0000 | 0.8310 | 0.9091 |
|             | KNN     | 0.7500 | 0.5000 | 1.0000 | 0.5831 | 0.7576 |
|             | Dtree   | 0.9063 | 0.8125 | 1.0000 | 0.8310 | 0.9091 |
|             | NB      | 1.0000 | 0.8750 | 1.0000 | 0.8848 | 0.9394 |
| HLA-B*57:01 | LR      | 0.9659 | 0.9219 | 0.9549 | 0.8773 | 0.9384 |
|             | SVM     | 0.9683 | 0.9184 | 0.9584 | 0.8775 | 0.9384 |
|             | Bagging | 0.9531 | 0.9149 | 0.9601 | 0.8760 | 0.9376 |
|             | XGBoost | 0.9676 | 0.9253 | 0.9445 | 0.8701 | 0.9350 |
|             | KNN     | 0.9418 | 0.9271 | 0.9480 | 0.8753 | 0.9376 |
|             | Dtree   | 0.9159 | 0.9201 | 0.9116 | 0.8318 | 0.9159 |

|             |         |        |        |        |        |        |
|-------------|---------|--------|--------|--------|--------|--------|
| HLA-B*57:03 | NB      | 0.9453 | 0.9184 | 0.9601 | 0.8793 | 0.9393 |
|             | LR      | 0.9629 | 0.9760 | 0.9464 | 0.9228 | 0.9612 |
|             | SVM     | 0.9860 | 0.9581 | 0.9702 | 0.9284 | 0.9642 |
|             | Bagging | 0.9793 | 0.9521 | 0.9643 | 0.9165 | 0.9582 |
|             | XGBoost | 0.9817 | 0.9701 | 0.9524 | 0.9225 | 0.9612 |
|             | KNN     | 0.9655 | 0.9641 | 0.9405 | 0.9047 | 0.9522 |
|             | Dtree   | 0.9434 | 0.9760 | 0.9107 | 0.8885 | 0.9433 |
| HLA-B*58:01 | NB      | 0.9675 | 0.9760 | 0.9524 | 0.9286 | 0.9642 |
|             | LR      | 0.9796 | 0.9612 | 0.9712 | 0.9324 | 0.9662 |
|             | SVM     | 0.9694 | 0.9515 | 0.9712 | 0.9229 | 0.9614 |
|             | Bagging | 0.9706 | 0.9709 | 0.9519 | 0.9229 | 0.9614 |
|             | XGBoost | 0.9814 | 0.9709 | 0.9712 | 0.9420 | 0.9710 |
|             | KNN     | 0.9601 | 0.9515 | 0.9712 | 0.9229 | 0.9614 |
|             | Dtree   | 0.9614 | 0.9612 | 0.9615 | 0.9227 | 0.9614 |
| HLA-C*01:02 | NB      | 0.9624 | 0.9709 | 0.9712 | 0.9420 | 0.9710 |
|             | LR      | 0.8662 | 0.7045 | 0.9556 | 0.6833 | 0.8315 |
|             | SVM     | 0.8778 | 0.7045 | 0.9556 | 0.6833 | 0.8315 |
|             | Bagging | 0.9056 | 0.7045 | 0.9556 | 0.6833 | 0.8315 |
|             | XGBoost | 0.8881 | 0.7045 | 0.9556 | 0.6833 | 0.8315 |
|             | KNN     | 0.8770 | 0.7500 | 0.9556 | 0.7222 | 0.8539 |
|             | Dtree   | 0.8081 | 0.7273 | 0.8889 | 0.6251 | 0.8090 |
| HLA-C*02:02 | NB      | 0.8462 | 0.7500 | 0.9556 | 0.7222 | 0.8539 |
|             | LR      | 0.9929 | 0.8462 | 1.0000 | 0.8585 | 0.9245 |
|             | SVM     | 0.9900 | 0.8077 | 1.0000 | 0.8255 | 0.9057 |
|             | Bagging | 0.9231 | 0.7308 | 1.0000 | 0.7618 | 0.8679 |
|             | XGBoost | 0.8939 | 0.7692 | 1.0000 | 0.7933 | 0.8868 |
|             | KNN     | 0.9231 | 0.8462 | 1.0000 | 0.8585 | 0.9245 |
|             | Dtree   | 0.8654 | 0.7308 | 1.0000 | 0.7618 | 0.8679 |
| HLA-C*03:03 | NB      | 0.9929 | 0.8462 | 1.0000 | 0.8585 | 0.9245 |
|             | LR      | 0.9500 | 0.9000 | 0.9524 | 0.8544 | 0.9268 |
|             | SVM     | 0.9548 | 0.9000 | 0.9048 | 0.8048 | 0.9024 |
|             | Bagging | 0.9440 | 0.9000 | 0.9524 | 0.8544 | 0.9268 |
|             | XGBoost | 0.9393 | 0.9000 | 0.9524 | 0.8544 | 0.9268 |
|             | KNN     | 0.8726 | 0.7500 | 0.9524 | 0.7197 | 0.8537 |
|             | Dtree   | 0.9262 | 0.9000 | 0.9524 | 0.8544 | 0.9268 |
| HLA-C*03:04 | NB      | 0.9167 | 0.9500 | 0.9048 | 0.8548 | 0.9268 |
|             | LR      | 0.9831 | 0.9600 | 0.9231 | 0.8831 | 0.9412 |
|             | SVM     | 0.9677 | 0.9600 | 0.9231 | 0.8831 | 0.9412 |
|             | Bagging | 0.9385 | 0.9200 | 0.9231 | 0.8431 | 0.9216 |
|             | XGBoost | 0.9923 | 0.9200 | 1.0000 | 0.9243 | 0.9608 |
|             | KNN     | 0.9369 | 0.9600 | 0.9231 | 0.8831 | 0.9412 |
|             | Dtree   | 0.9215 | 0.9200 | 0.9231 | 0.8431 | 0.9216 |
| HLA-C*04:01 | NB      | 0.9323 | 0.9600 | 0.9231 | 0.8831 | 0.9412 |
|             | LR      | 0.8339 | 0.8125 | 0.7231 | 0.5375 | 0.7674 |

|             |         |        |        |        |        |        |
|-------------|---------|--------|--------|--------|--------|--------|
|             | SVM     | 0.8272 | 0.8438 | 0.7385 | 0.5852 | 0.7907 |
|             | Bagging | 0.8353 | 0.8438 | 0.7231 | 0.5707 | 0.7829 |
|             | XGBoost | 0.8113 | 0.8281 | 0.7385 | 0.5686 | 0.7829 |
|             | KNN     | 0.7891 | 0.8438 | 0.7385 | 0.5852 | 0.7907 |
|             | Dtree   | 0.7834 | 0.8438 | 0.7231 | 0.5707 | 0.7829 |
|             | NB      | 0.7959 | 0.8438 | 0.7385 | 0.5852 | 0.7907 |
| HLA-C*05:01 | LR      | 0.9661 | 0.9500 | 0.9836 | 0.9344 | 0.9669 |
|             | SVM     | 0.9585 | 0.9500 | 0.9836 | 0.9344 | 0.9669 |
|             | Bagging | 0.9706 | 0.9167 | 0.9672 | 0.8853 | 0.9421 |
|             | XGBoost | 0.9743 | 0.9333 | 0.9672 | 0.9013 | 0.9504 |
|             | KNN     | 0.9668 | 0.9500 | 0.9836 | 0.9344 | 0.9669 |
|             | Dtree   | 0.9668 | 0.9500 | 0.9836 | 0.9344 | 0.9669 |
|             | NB      | 0.9768 | 0.9500 | 0.9836 | 0.9344 | 0.9669 |
| HLA-C*06:02 | LR      | 0.8278 | 0.8000 | 0.8333 | 0.6338 | 0.8169 |
|             | SVM     | 0.8024 | 0.8286 | 0.8333 | 0.6619 | 0.8310 |
|             | Bagging | 0.8294 | 0.8571 | 0.7778 | 0.6364 | 0.8169 |
|             | XGBoost | 0.8583 | 0.8571 | 0.8056 | 0.6632 | 0.8310 |
|             | KNN     | 0.8214 | 0.8286 | 0.8333 | 0.6619 | 0.8310 |
|             | Dtree   | 0.8024 | 0.7714 | 0.8333 | 0.6062 | 0.8028 |
|             | NB      | 0.8837 | 0.8286 | 0.8333 | 0.6619 | 0.8310 |
| HLA-C*07:01 | LR      | 0.9657 | 0.8293 | 1.0000 | 0.8431 | 0.9157 |
|             | SVM     | 0.9233 | 0.8293 | 0.9762 | 0.8155 | 0.9036 |
|             | Bagging | 0.9268 | 0.7561 | 1.0000 | 0.7815 | 0.8795 |
|             | XGBoost | 0.8902 | 0.7805 | 1.0000 | 0.8017 | 0.8916 |
|             | KNN     | 0.9027 | 0.8293 | 0.9762 | 0.8155 | 0.9036 |
|             | Dtree   | 0.9024 | 0.8049 | 1.0000 | 0.8223 | 0.9036 |
|             | NB      | 0.9036 | 0.6829 | 1.0000 | 0.7222 | 0.8434 |
| HLA-C*07:02 | LR      | 0.9071 | 0.9500 | 0.7143 | 0.6807 | 0.8293 |
|             | SVM     | 0.9333 | 0.9500 | 0.7143 | 0.6807 | 0.8293 |
|             | Bagging | 0.9024 | 0.8500 | 0.9048 | 0.7566 | 0.8780 |
|             | XGBoost | 0.9274 | 0.9500 | 0.7143 | 0.6807 | 0.8293 |
|             | KNN     | 0.8929 | 0.9000 | 0.9048 | 0.8048 | 0.9024 |
|             | Dtree   | 0.8786 | 0.9000 | 0.8571 | 0.7571 | 0.8780 |
|             | NB      | 0.8667 | 0.9500 | 0.7143 | 0.6807 | 0.8293 |
| HLA-C*08:02 | LR      | 0.9645 | 0.8333 | 0.9677 | 0.8098 | 0.9016 |
|             | SVM     | 0.9892 | 0.9333 | 0.9677 | 0.9020 | 0.9508 |
|             | Bagging | 0.9194 | 0.8333 | 0.8710 | 0.7051 | 0.8525 |
|             | XGBoost | 0.9591 | 0.9333 | 0.9677 | 0.9020 | 0.9508 |
|             | KNN     | 0.9753 | 0.9667 | 0.9677 | 0.9344 | 0.9672 |
|             | Dtree   | 0.9339 | 0.9000 | 0.9677 | 0.8706 | 0.9344 |
|             | NB      | 0.9672 | 0.9667 | 0.9677 | 0.9344 | 0.9672 |
| HLA-C*16:01 | LR      | 0.9381 | 1.0000 | 0.8667 | 0.8708 | 0.9310 |
|             | SVM     | 0.9381 | 1.0000 | 0.8000 | 0.8117 | 0.8966 |
|             | Bagging | 0.9333 | 1.0000 | 0.8667 | 0.8708 | 0.9310 |



|    |             |         |        |        |        |        |        |
|----|-------------|---------|--------|--------|--------|--------|--------|
|    |             | XGBoost | 0.9452 | 1.0000 | 0.8667 | 0.8708 | 0.9310 |
|    |             | KNN     | 0.8929 | 1.0000 | 0.8000 | 0.8117 | 0.8966 |
|    |             | Dtree   | 0.9333 | 1.0000 | 0.8667 | 0.8708 | 0.9310 |
|    |             | NB      | 0.8905 | 0.9286 | 0.8667 | 0.7952 | 0.8966 |
| 12 | HLA-A*01:01 | LR      | 0.9514 | 0.9364 | 0.9598 | 0.8965 | 0.9481 |
|    |             | SVM     | 0.9768 | 0.9538 | 0.9540 | 0.9078 | 0.9539 |
|    |             | Bagging | 0.9326 | 0.9595 | 0.9540 | 0.9136 | 0.9568 |
|    |             | XGBoost | 0.9748 | 0.9538 | 0.9540 | 0.9078 | 0.9539 |
|    |             | KNN     | 0.9524 | 0.9422 | 0.9598 | 0.9021 | 0.9510 |
|    |             | Dtree   | 0.9482 | 0.9595 | 0.9368 | 0.8965 | 0.9481 |
|    |             | NB      | 0.9264 | 0.9538 | 0.9540 | 0.9078 | 0.9539 |
|    | HLA-A*02:01 | LR      | 0.8950 | 0.9254 | 0.8559 | 0.7831 | 0.8906 |
|    |             | SVM     | 0.9334 | 0.9211 | 0.8646 | 0.7869 | 0.8928 |
|    |             | Bagging | 0.8985 | 0.9123 | 0.8384 | 0.7527 | 0.8753 |
|    |             | XGBoost | 0.9164 | 0.9079 | 0.8646 | 0.7732 | 0.8862 |
|    |             | KNN     | 0.8912 | 0.8684 | 0.8777 | 0.7462 | 0.8731 |
|    |             | Dtree   | 0.8600 | 0.8640 | 0.8559 | 0.7199 | 0.8600 |
|    |             | NB      | 0.8615 | 0.9211 | 0.8646 | 0.7869 | 0.8928 |
|    | HLA-A*03:01 | LR      | 0.9663 | 0.9540 | 0.9432 | 0.8972 | 0.9486 |
|    |             | SVM     | 0.9717 | 0.9540 | 0.9432 | 0.8972 | 0.9486 |
|    |             | Bagging | 0.9681 | 0.9540 | 0.9432 | 0.8972 | 0.9486 |
|    |             | XGBoost | 0.9613 | 0.9540 | 0.9432 | 0.8972 | 0.9486 |
|    |             | KNN     | 0.9478 | 0.9540 | 0.9432 | 0.8972 | 0.9486 |
|    |             | Dtree   | 0.9314 | 0.9310 | 0.9318 | 0.8629 | 0.9314 |
|    |             | NB      | 0.9654 | 0.9540 | 0.9432 | 0.8972 | 0.9486 |
|    | HLA-A*11:01 | LR      | 0.9762 | 0.9516 | 0.9524 | 0.9040 | 0.9520 |
|    |             | SVM     | 0.9675 | 0.9032 | 0.9683 | 0.8737 | 0.9360 |
|    |             | Bagging | 0.9722 | 0.9194 | 0.9683 | 0.8890 | 0.9440 |
|    |             | XGBoost | 0.9844 | 0.9355 | 0.9683 | 0.9044 | 0.9520 |
|    |             | KNN     | 0.9562 | 0.9355 | 0.9683 | 0.9044 | 0.9520 |
|    |             | Dtree   | 0.9439 | 0.9355 | 0.9524 | 0.8881 | 0.9440 |
|    |             | NB      | 0.9455 | 0.9194 | 0.9683 | 0.8890 | 0.9440 |
|    | HLA-A*24:02 | LR      | 0.9624 | 0.9355 | 0.9683 | 0.9044 | 0.9520 |
|    |             | SVM     | 0.9542 | 0.9194 | 0.9841 | 0.9058 | 0.9520 |
|    |             | Bagging | 0.9675 | 0.9194 | 0.9683 | 0.8890 | 0.9440 |
|    |             | XGBoost | 0.9759 | 0.9194 | 0.9683 | 0.8890 | 0.9440 |
|    |             | KNN     | 0.9517 | 0.9194 | 0.9841 | 0.9058 | 0.9520 |
|    |             | Dtree   | 0.9439 | 0.9355 | 0.9524 | 0.8881 | 0.9440 |
|    |             | NB      | 0.9534 | 0.9516 | 0.9524 | 0.9040 | 0.9520 |
|    | HLA-A*29:02 | LR      | 0.9501 | 0.9394 | 0.9118 | 0.8512 | 0.9254 |
|    |             | SVM     | 0.9118 | 0.9394 | 0.8824 | 0.8225 | 0.9104 |
|    |             | Bagging | 0.9305 | 0.9394 | 0.9118 | 0.8512 | 0.9254 |
|    |             | XGBoost | 0.9403 | 0.9394 | 0.8824 | 0.8225 | 0.9104 |
|    |             | KNN     | 0.9162 | 0.9394 | 0.9118 | 0.8512 | 0.9254 |

|             |         |        |        |        |        |        |
|-------------|---------|--------|--------|--------|--------|--------|
|             | Dtree   | 0.9109 | 0.9394 | 0.8824 | 0.8225 | 0.9104 |
|             | NB      | 0.9033 | 0.9394 | 0.8824 | 0.8225 | 0.9104 |
| HLA-A*31:01 | LR      | 0.9631 | 0.9600 | 0.8077 | 0.7749 | 0.8824 |
|             | SVM     | 0.9415 | 0.9600 | 0.8077 | 0.7749 | 0.8824 |
|             | Bagging | 0.9485 | 0.9200 | 0.8462 | 0.7673 | 0.8824 |
|             | XGBoost | 0.9692 | 0.9600 | 0.8077 | 0.7749 | 0.8824 |
|             | KNN     | 0.9354 | 0.9600 | 0.8077 | 0.7749 | 0.8824 |
|             | Dtree   | 0.8831 | 0.9200 | 0.8462 | 0.7673 | 0.8824 |
|             | NB      | 0.9015 | 0.9600 | 0.8077 | 0.7749 | 0.8824 |
| HLA-A*68:01 | LR      | 0.9669 | 1.0000 | 0.9412 | 0.9412 | 0.9697 |
|             | SVM     | 0.9706 | 1.0000 | 0.9412 | 0.9412 | 0.9697 |
|             | Bagging | 0.9669 | 1.0000 | 0.9412 | 0.9412 | 0.9697 |
|             | XGBoost | 0.9706 | 1.0000 | 0.9412 | 0.9412 | 0.9697 |
|             | KNN     | 0.9706 | 1.0000 | 0.9412 | 0.9412 | 0.9697 |
|             | Dtree   | 0.9706 | 1.0000 | 0.9412 | 0.9412 | 0.9697 |
|             | NB      | 0.9522 | 1.0000 | 0.9412 | 0.9412 | 0.9697 |
| HLA-A*68:02 | LR      | 0.9170 | 0.7895 | 0.8462 | 0.6369 | 0.8182 |
|             | SVM     | 0.8995 | 0.7895 | 0.8462 | 0.6369 | 0.8182 |
|             | Bagging | 0.8570 | 0.8684 | 0.7179 | 0.5924 | 0.7922 |
|             | XGBoost | 0.8664 | 0.7368 | 0.9231 | 0.6728 | 0.8312 |
|             | KNN     | 0.8171 | 0.7895 | 0.8205 | 0.6104 | 0.8052 |
|             | Dtree   | 0.7932 | 0.8684 | 0.7179 | 0.5924 | 0.7922 |
|             | NB      | 0.9207 | 0.9211 | 0.7949 | 0.7208 | 0.8571 |
| HLA-B*07:02 | LR      | 0.9774 | 0.9541 | 0.9636 | 0.9178 | 0.9589 |
|             | SVM     | 0.9756 | 0.9541 | 0.9636 | 0.9178 | 0.9589 |
|             | Bagging | 0.9606 | 0.9450 | 0.9636 | 0.9088 | 0.9543 |
|             | XGBoost | 0.9729 | 0.9633 | 0.9636 | 0.9269 | 0.9635 |
|             | KNN     | 0.9611 | 0.9541 | 0.9636 | 0.9178 | 0.9589 |
|             | Dtree   | 0.8717 | 0.7706 | 0.9727 | 0.7596 | 0.8721 |
|             | NB      | 0.9560 | 0.9541 | 0.9636 | 0.9178 | 0.9589 |
| HLA-B*08:01 | LR      | 0.9708 | 0.8919 | 0.9737 | 0.8693 | 0.9333 |
|             | SVM     | 0.9644 | 0.8919 | 0.9737 | 0.8693 | 0.9333 |
|             | Bagging | 0.9459 | 0.8919 | 0.9737 | 0.8693 | 0.9333 |
|             | XGBoost | 0.9328 | 0.8919 | 0.9737 | 0.8693 | 0.9333 |
|             | KNN     | 0.9328 | 0.8919 | 0.9737 | 0.8693 | 0.9333 |
|             | Dtree   | 0.9328 | 0.8919 | 0.9737 | 0.8693 | 0.9333 |
|             | NB      | 0.9050 | 0.8919 | 0.9737 | 0.8693 | 0.9333 |
| HLA-B*15:01 | LR      | 0.9244 | 0.8831 | 0.9231 | 0.8070 | 0.9032 |
|             | SVM     | 0.9257 | 0.8831 | 0.9231 | 0.8070 | 0.9032 |
|             | Bagging | 0.9516 | 0.8701 | 0.9359 | 0.8080 | 0.9032 |
|             | XGBoost | 0.9599 | 0.8701 | 0.9103 | 0.7812 | 0.8903 |
|             | KNN     | 0.9103 | 0.8831 | 0.9231 | 0.8070 | 0.9032 |
|             | Dtree   | 0.8837 | 0.8571 | 0.9103 | 0.7687 | 0.8839 |
|             | NB      | 0.8686 | 0.8571 | 0.9231 | 0.7822 | 0.8903 |

|             |         |        |        |        |        |        |
|-------------|---------|--------|--------|--------|--------|--------|
| HLA-B*27:01 | LR      | 1.0000 | 1.0000 | 1.0000 | 1.0000 | 1.0000 |
|             | SVM     | 1.0000 | 1.0000 | 1.0000 | 1.0000 | 1.0000 |
|             | Bagging | 1.0000 | 1.0000 | 1.0000 | 1.0000 | 1.0000 |
|             | XGBoost | 1.0000 | 1.0000 | 1.0000 | 1.0000 | 1.0000 |
|             | KNN     | 1.0000 | 1.0000 | 1.0000 | 1.0000 | 1.0000 |
|             | Dtree   | 1.0000 | 1.0000 | 1.0000 | 1.0000 | 1.0000 |
|             | NB      | 1.0000 | 1.0000 | 1.0000 | 1.0000 | 1.0000 |
| HLA-B*27:02 | LR      | 0.9819 | 1.0000 | 0.9500 | 0.9508 | 0.9748 |
|             | SVM     | 0.9794 | 1.0000 | 0.9500 | 0.9508 | 0.9748 |
|             | Bagging | 0.9890 | 0.9831 | 0.9500 | 0.9333 | 0.9664 |
|             | XGBoost | 0.9864 | 1.0000 | 0.9500 | 0.9508 | 0.9748 |
|             | KNN     | 0.9750 | 1.0000 | 0.9500 | 0.9508 | 0.9748 |
|             | Dtree   | 0.9750 | 1.0000 | 0.9500 | 0.9508 | 0.9748 |
|             | NB      | 0.9917 | 1.0000 | 0.9500 | 0.9508 | 0.9748 |
| HLA-B*27:03 | LR      | 1.0000 | 1.0000 | 1.0000 | 1.0000 | 1.0000 |
|             | SVM     | 1.0000 | 1.0000 | 1.0000 | 1.0000 | 1.0000 |
|             | Bagging | 1.0000 | 1.0000 | 1.0000 | 1.0000 | 1.0000 |
|             | XGBoost | 1.0000 | 1.0000 | 1.0000 | 1.0000 | 1.0000 |
|             | KNN     | 1.0000 | 1.0000 | 1.0000 | 1.0000 | 1.0000 |
|             | Dtree   | 1.0000 | 1.0000 | 1.0000 | 1.0000 | 1.0000 |
|             | NB      | 1.0000 | 1.0000 | 1.0000 | 1.0000 | 1.0000 |
| HLA-B*27:05 | LR      | 0.7492 | 0.8717 | 0.6235 | 0.5111 | 0.7475 |
|             | SVM     | 0.8016 | 0.8770 | 0.6088 | 0.5042 | 0.7428 |
|             | Bagging | 0.7181 | 0.4693 | 0.8144 | 0.3023 | 0.6420 |
|             | XGBoost | 0.5677 | 0.8048 | 0.3178 | 0.1403 | 0.5611 |
|             | KNN     | 0.7864 | 0.6858 | 0.8024 | 0.4916 | 0.7442 |
|             | Dtree   | 0.7702 | 0.7366 | 0.8037 | 0.5416 | 0.7702 |
|             | NB      | 0.7816 | 0.8797 | 0.6021 | 0.5015 | 0.7408 |
| HLA-B*27:07 | LR      | 0.9433 | 0.9583 | 0.9600 | 0.9183 | 0.9592 |
|             | SVM     | 0.9683 | 0.9583 | 0.9600 | 0.9183 | 0.9592 |
|             | Bagging | 0.9592 | 0.9583 | 0.9600 | 0.9183 | 0.9592 |
|             | XGBoost | 0.9833 | 0.9583 | 0.9600 | 0.9183 | 0.9592 |
|             | KNN     | 0.9592 | 0.9583 | 0.9600 | 0.9183 | 0.9592 |
|             | Dtree   | 0.9592 | 0.9583 | 0.9600 | 0.9183 | 0.9592 |
|             | NB      | 0.9392 | 0.9583 | 0.9600 | 0.9183 | 0.9592 |
| HLA-B*27:08 | LR      | 0.8816 | 0.9063 | 0.9394 | 0.8464 | 0.9231 |
|             | SVM     | 0.9328 | 0.9063 | 0.9394 | 0.8464 | 0.9231 |
|             | Bagging | 0.9058 | 0.9063 | 0.9394 | 0.8464 | 0.9231 |
|             | XGBoost | 0.9228 | 0.9063 | 0.9394 | 0.8464 | 0.9231 |
|             | KNN     | 0.9228 | 0.9063 | 0.9394 | 0.8464 | 0.9231 |
|             | Dtree   | 0.9228 | 0.9063 | 0.9394 | 0.8464 | 0.9231 |
|             | NB      | 0.8703 | 0.9063 | 0.9394 | 0.8464 | 0.9231 |
| HLA-B*27:09 | LR      | 0.9421 | 0.8852 | 0.8871 | 0.7723 | 0.8862 |
|             | SVM     | 0.9474 | 0.9016 | 0.8710 | 0.7728 | 0.8862 |

|             |         |        |        |        |        |        |
|-------------|---------|--------|--------|--------|--------|--------|
|             | Bagging | 0.9044 | 0.9180 | 0.8548 | 0.7741 | 0.8862 |
|             | XGBoost | 0.9266 | 0.9016 | 0.8710 | 0.7728 | 0.8862 |
|             | KNN     | 0.8823 | 0.9016 | 0.8710 | 0.7728 | 0.8862 |
|             | Dtree   | 0.8864 | 0.9180 | 0.8548 | 0.7741 | 0.8862 |
|             | NB      | 0.9327 | 0.9016 | 0.8710 | 0.7728 | 0.8862 |
| HLA-B*35:01 | LR      | 0.9077 | 0.8611 | 0.8919 | 0.7536 | 0.8767 |
|             | SVM     | 0.9437 | 0.8333 | 0.9189 | 0.7557 | 0.8767 |
|             | Bagging | 0.8679 | 0.8333 | 0.9189 | 0.7557 | 0.8767 |
|             | XGBoost | 0.8814 | 0.8889 | 0.8919 | 0.7808 | 0.8904 |
|             | KNN     | 0.8885 | 0.8611 | 0.8919 | 0.7536 | 0.8767 |
|             | Dtree   | 0.8765 | 0.8611 | 0.8919 | 0.7536 | 0.8767 |
|             | NB      | 0.8446 | 0.8611 | 0.8919 | 0.7536 | 0.8767 |
| HLA-B*40:01 | LR      | 0.9990 | 1.0000 | 0.9688 | 0.9688 | 0.9841 |
|             | SVM     | 0.9990 | 1.0000 | 0.9688 | 0.9688 | 0.9841 |
|             | Bagging | 0.9839 | 1.0000 | 0.9688 | 0.9688 | 0.9841 |
|             | XGBoost | 0.9829 | 1.0000 | 0.9688 | 0.9688 | 0.9841 |
|             | KNN     | 0.9844 | 1.0000 | 0.9688 | 0.9688 | 0.9841 |
|             | Dtree   | 1.0000 | 1.0000 | 1.0000 | 1.0000 | 1.0000 |
|             | NB      | 0.9929 | 1.0000 | 0.9688 | 0.9688 | 0.9841 |
| HLA-B*40:02 | LR      | 0.9930 | 0.9512 | 0.9762 | 0.9279 | 0.9639 |
|             | SVM     | 0.9675 | 0.9512 | 0.9762 | 0.9279 | 0.9639 |
|             | Bagging | 0.9730 | 0.9512 | 0.9524 | 0.9036 | 0.9518 |
|             | XGBoost | 0.9768 | 0.9512 | 0.9762 | 0.9279 | 0.9639 |
|             | KNN     | 0.9756 | 0.9512 | 0.9762 | 0.9279 | 0.9639 |
|             | Dtree   | 0.9637 | 0.9512 | 0.9762 | 0.9279 | 0.9639 |
|             | NB      | 0.9501 | 0.9512 | 0.9762 | 0.9279 | 0.9639 |
| HLA-B*44:02 | LR      | 0.9925 | 0.9385 | 0.9848 | 0.9246 | 0.9618 |
|             | SVM     | 0.9695 | 0.9538 | 0.9848 | 0.9394 | 0.9695 |
|             | Bagging | 0.9761 | 0.9692 | 0.9848 | 0.9543 | 0.9771 |
|             | XGBoost | 0.9784 | 0.9692 | 0.9848 | 0.9543 | 0.9771 |
|             | KNN     | 0.9617 | 0.9385 | 0.9848 | 0.9246 | 0.9618 |
|             | Dtree   | 0.9541 | 0.9385 | 0.9697 | 0.9088 | 0.9542 |
|             | NB      | 0.9710 | 0.9385 | 0.9697 | 0.9088 | 0.9542 |
| HLA-B*44:03 | LR      | 0.9561 | 0.9535 | 1.0000 | 0.9550 | 0.9770 |
|             | SVM     | 0.9757 | 0.9535 | 1.0000 | 0.9550 | 0.9770 |
|             | Bagging | 0.9720 | 0.9535 | 1.0000 | 0.9550 | 0.9770 |
|             | XGBoost | 0.9656 | 0.9535 | 1.0000 | 0.9550 | 0.9770 |
|             | KNN     | 0.9762 | 0.9535 | 1.0000 | 0.9550 | 0.9770 |
|             | Dtree   | 0.9767 | 0.9535 | 1.0000 | 0.9550 | 0.9770 |
|             | NB      | 0.9979 | 0.9535 | 1.0000 | 0.9550 | 0.9770 |
| HLA-B*51:01 | LR      | 0.8987 | 0.8732 | 0.8056 | 0.6801 | 0.8392 |
|             | SVM     | 0.8241 | 0.8732 | 0.8056 | 0.6801 | 0.8392 |
|             | Bagging | 0.8732 | 0.8732 | 0.8056 | 0.6801 | 0.8392 |
|             | XGBoost | 0.8670 | 0.8732 | 0.8194 | 0.6935 | 0.8462 |

|             |         |        |        |        |        |        |
|-------------|---------|--------|--------|--------|--------|--------|
|             | KNN     | 0.8380 | 0.8732 | 0.8056 | 0.6801 | 0.8392 |
|             | Dtree   | 0.8394 | 0.8732 | 0.8056 | 0.6801 | 0.8392 |
|             | NB      | 0.8292 | 0.8732 | 0.7917 | 0.6669 | 0.8322 |
| HLA-B*57:01 | LR      | 0.9063 | 0.9343 | 0.6690 | 0.6255 | 0.8014 |
|             | SVM     | 0.9399 | 0.9066 | 0.9172 | 0.8239 | 0.9119 |
|             | Bagging | 0.9034 | 0.9170 | 0.9103 | 0.8273 | 0.9136 |
|             | XGBoost | 0.9245 | 0.9135 | 0.9069 | 0.8204 | 0.9102 |
|             | KNN     | 0.8530 | 0.9135 | 0.7931 | 0.7117 | 0.8532 |
|             | Dtree   | 0.5155 | 0.9896 | 0.0414 | 0.0976 | 0.5147 |
|             | NB      | 0.9046 | 0.9446 | 0.4828 | 0.4817 | 0.7133 |
| HLA-B*57:03 | LR      | 0.9707 | 0.9167 | 0.9459 | 0.8633 | 0.9315 |
|             | SVM     | 0.9489 | 0.9167 | 0.9730 | 0.8917 | 0.9452 |
|             | Bagging | 0.9167 | 0.9167 | 0.9189 | 0.8356 | 0.9178 |
|             | XGBoost | 0.9227 | 0.8889 | 0.9189 | 0.8084 | 0.9041 |
|             | KNN     | 0.9448 | 0.9167 | 0.9730 | 0.8917 | 0.9452 |
|             | Dtree   | 0.9039 | 0.8889 | 0.9189 | 0.8084 | 0.9041 |
|             | NB      | 0.9722 | 0.9167 | 0.9459 | 0.8633 | 0.9315 |
| HLA-B*58:01 | LR      | 0.9373 | 0.9143 | 0.9167 | 0.8310 | 0.9155 |
|             | SVM     | 0.9190 | 0.9143 | 0.9444 | 0.8594 | 0.9296 |
|             | Bagging | 0.9028 | 0.8571 | 0.8889 | 0.7466 | 0.8732 |
|             | XGBoost | 0.9532 | 0.8286 | 1.0000 | 0.8427 | 0.9155 |
|             | KNN     | 0.9369 | 0.9143 | 0.9444 | 0.8594 | 0.9296 |
|             | Dtree   | 0.9433 | 0.9143 | 0.9722 | 0.8886 | 0.9437 |
|             | NB      | 0.9810 | 0.9143 | 0.9444 | 0.8594 | 0.9296 |
| HLA-C*01:02 | LR      | 0.9361 | 0.9512 | 0.8095 | 0.7675 | 0.8795 |
|             | SVM     | 0.9437 | 0.9512 | 0.8095 | 0.7675 | 0.8795 |
|             | Bagging | 0.8804 | 0.9512 | 0.8095 | 0.7675 | 0.8795 |
|             | XGBoost | 0.9152 | 0.9512 | 0.8095 | 0.7675 | 0.8795 |
|             | KNN     | 0.8804 | 0.9512 | 0.8095 | 0.7675 | 0.8795 |
|             | Dtree   | 0.9277 | 0.9268 | 0.9286 | 0.8554 | 0.9277 |
|             | NB      | 0.9135 | 0.9512 | 0.8095 | 0.7675 | 0.8795 |
| HLA-C*04:01 | LR      | 0.7600 | 0.6800 | 0.7308 | 0.4114 | 0.7059 |
|             | SVM     | 0.7554 | 0.6800 | 0.7308 | 0.4114 | 0.7059 |
|             | Bagging | 0.7123 | 0.6800 | 0.7308 | 0.4114 | 0.7059 |
|             | XGBoost | 0.7169 | 0.6800 | 0.7308 | 0.4114 | 0.7059 |
|             | KNN     | 0.6808 | 0.6800 | 0.7308 | 0.4114 | 0.7059 |
|             | Dtree   | 0.7054 | 0.6800 | 0.7308 | 0.4114 | 0.7059 |
|             | NB      | 0.7600 | 0.6800 | 0.7308 | 0.4114 | 0.7059 |
| HLA-C*05:01 | LR      | 0.9786 | 1.0000 | 0.9048 | 0.9069 | 0.9512 |
|             | SVM     | 0.9786 | 1.0000 | 0.9048 | 0.9069 | 0.9512 |
|             | Bagging | 0.9726 | 0.9500 | 0.9048 | 0.8548 | 0.9268 |
|             | XGBoost | 0.9595 | 0.9500 | 0.9524 | 0.9024 | 0.9512 |
|             | KNN     | 0.9726 | 0.9500 | 0.9524 | 0.9024 | 0.9512 |
|             | Dtree   | 0.8083 | 0.9500 | 0.6667 | 0.6399 | 0.8049 |

|    |             |         |        |        |        |        |        |
|----|-------------|---------|--------|--------|--------|--------|--------|
|    |             | NB      | 0.9357 | 0.9500 | 0.8095 | 0.7650 | 0.8780 |
|    | HLA-C*06:02 | LR      | 0.8860 | 0.9615 | 0.6667 | 0.6549 | 0.8113 |
|    |             | SVM     | 0.8291 | 0.8462 | 0.6667 | 0.5203 | 0.7547 |
|    |             | Bagging | 0.8120 | 0.9615 | 0.6667 | 0.6549 | 0.8113 |
|    |             | XGBoost | 0.9074 | 0.9615 | 0.6667 | 0.6549 | 0.8113 |
|    |             | KNN     | 0.7479 | 0.8462 | 0.6667 | 0.5203 | 0.7547 |
|    |             | Dtree   | 0.7215 | 0.9615 | 0.4815 | 0.5023 | 0.7170 |
|    |             | NB      | 0.8903 | 0.9615 | 0.6667 | 0.6549 | 0.8113 |
|    | HLA-C*07:01 | LR      | 0.9850 | 0.9167 | 0.9730 | 0.8917 | 0.9452 |
|    |             | SVM     | 0.9640 | 0.9167 | 0.9730 | 0.8917 | 0.9452 |
|    |             | Bagging | 0.9786 | 0.9167 | 0.9730 | 0.8917 | 0.9452 |
|    |             | XGBoost | 0.9745 | 0.9167 | 0.9730 | 0.8917 | 0.9452 |
|    |             | KNN     | 0.9568 | 0.9167 | 0.9730 | 0.8917 | 0.9452 |
|    |             | Dtree   | 0.9583 | 0.9167 | 1.0000 | 0.9208 | 0.9589 |
|    |             | NB      | 0.9317 | 0.9167 | 0.9730 | 0.8917 | 0.9452 |
| 13 | HLA-A*01:01 | LR      | 0.9847 | 0.9727 | 0.9910 | 0.9640 | 0.9819 |
|    |             | SVM     | 0.9988 | 0.9727 | 0.9910 | 0.9640 | 0.9819 |
|    |             | Bagging | 0.9803 | 0.9727 | 0.9910 | 0.9640 | 0.9819 |
|    |             | XGBoost | 0.9958 | 0.9909 | 0.9820 | 0.9729 | 0.9864 |
|    |             | KNN     | 0.9817 | 0.9727 | 0.9910 | 0.9640 | 0.9819 |
|    |             | Dtree   | 0.9819 | 0.9727 | 0.9910 | 0.9640 | 0.9819 |
|    |             | NB      | 0.9944 | 0.9727 | 0.9910 | 0.9640 | 0.9819 |
|    | HLA-A*02:01 | LR      | 0.9521 | 0.8947 | 0.9271 | 0.8224 | 0.9110 |
|    |             | SVM     | 0.9174 | 0.8842 | 0.9271 | 0.8122 | 0.9058 |
|    |             | Bagging | 0.9014 | 0.8947 | 0.8958 | 0.7906 | 0.8953 |
|    |             | XGBoost | 0.9259 | 0.8632 | 0.9271 | 0.7921 | 0.8953 |
|    |             | KNN     | 0.8928 | 0.8842 | 0.8854 | 0.7696 | 0.8848 |
|    |             | Dtree   | 0.9213 | 0.8947 | 0.9479 | 0.8440 | 0.9215 |
|    |             | NB      | 0.9567 | 0.9053 | 0.9167 | 0.8220 | 0.9110 |
|    | HLA-A*03:01 | LR      | 0.9854 | 0.9444 | 0.9474 | 0.8918 | 0.9459 |
|    |             | SVM     | 0.9737 | 1.0000 | 0.8947 | 0.8974 | 0.9459 |
|    |             | Bagging | 0.9678 | 1.0000 | 0.8947 | 0.8974 | 0.9459 |
|    |             | XGBoost | 0.9883 | 1.0000 | 0.8947 | 0.8974 | 0.9459 |
|    |             | KNN     | 0.9415 | 0.8889 | 0.8947 | 0.7836 | 0.8919 |
|    |             | Dtree   | 0.9474 | 1.0000 | 0.8947 | 0.8974 | 0.9459 |
|    |             | NB      | 0.9825 | 1.0000 | 0.8947 | 0.8974 | 0.9459 |
|    | HLA-A*11:01 | LR      | 0.8596 | 0.8333 | 0.8421 | 0.6754 | 0.8378 |
|    |             | SVM     | 0.8363 | 0.8889 | 0.8421 | 0.7310 | 0.8649 |
|    |             | Bagging | 0.8377 | 0.8333 | 0.8421 | 0.6754 | 0.8378 |
|    |             | XGBoost | 0.9108 | 0.8333 | 0.8421 | 0.6754 | 0.8378 |
|    |             | KNN     | 0.8655 | 0.8889 | 0.8421 | 0.7310 | 0.8649 |
|    |             | Dtree   | 0.8377 | 0.8333 | 0.8421 | 0.6754 | 0.8378 |
|    |             | NB      | 0.9020 | 0.8333 | 0.8421 | 0.6754 | 0.8378 |
|    | HLA-A*24:02 | LR      | 0.9699 | 1.0000 | 0.6750 | 0.7115 | 0.8354 |

|             |         |        |        |        |        |        |
|-------------|---------|--------|--------|--------|--------|--------|
|             | SVM     | 0.9865 | 0.9487 | 0.9250 | 0.8737 | 0.9367 |
|             | Bagging | 0.9769 | 0.9744 | 0.8750 | 0.8526 | 0.9241 |
|             | XGBoost | 0.9202 | 0.9744 | 0.8750 | 0.8526 | 0.9241 |
|             | KNN     | 0.9497 | 0.9744 | 0.9250 | 0.8999 | 0.9494 |
|             | Dtree   | 0.9372 | 0.9744 | 0.9000 | 0.8760 | 0.9367 |
|             | NB      | 0.9872 | 0.9744 | 0.8000 | 0.7850 | 0.8861 |
| HLA-A*29:02 | LR      | 0.9507 | 0.9211 | 0.9231 | 0.8441 | 0.9221 |
|             | SVM     | 0.9487 | 0.9211 | 0.9231 | 0.8441 | 0.9221 |
|             | Bagging | 0.9386 | 0.9211 | 0.9231 | 0.8441 | 0.9221 |
|             | XGBoost | 0.9629 | 0.9211 | 0.9231 | 0.8441 | 0.9221 |
|             | KNN     | 0.9339 | 0.9211 | 0.9231 | 0.8441 | 0.9221 |
|             | Dtree   | 0.9221 | 0.9211 | 0.9231 | 0.8441 | 0.9221 |
|             | NB      | 0.9450 | 0.9211 | 0.9231 | 0.8441 | 0.9221 |
| HLA-A*31:01 | LR      | 0.8857 | 0.8571 | 0.9333 | 0.7943 | 0.8966 |
|             | SVM     | 0.8714 | 0.8571 | 0.9333 | 0.7943 | 0.8966 |
|             | Bagging | 0.9095 | 0.8571 | 0.8667 | 0.7238 | 0.8621 |
|             | XGBoost | 0.9357 | 0.8571 | 0.9333 | 0.7943 | 0.8966 |
|             | KNN     | 0.9000 | 0.8571 | 0.9333 | 0.7943 | 0.8966 |
|             | Dtree   | 0.8619 | 0.8571 | 0.8667 | 0.7238 | 0.8621 |
|             | NB      | 0.8952 | 0.8571 | 0.9333 | 0.7943 | 0.8966 |
| HLA-A*68:02 | LR      | 0.8913 | 0.8261 | 0.6667 | 0.4982 | 0.7447 |
|             | SVM     | 0.8080 | 0.8261 | 0.6667 | 0.4982 | 0.7447 |
|             | Bagging | 0.7482 | 0.9130 | 0.5833 | 0.5236 | 0.7447 |
|             | XGBoost | 0.7482 | 0.9130 | 0.5833 | 0.5236 | 0.7447 |
|             | KNN     | 0.7491 | 0.9130 | 0.5833 | 0.5236 | 0.7447 |
|             | Dtree   | 0.7482 | 0.9130 | 0.5833 | 0.5236 | 0.7447 |
|             | NB      | 0.8895 | 0.8261 | 0.6667 | 0.4982 | 0.7447 |
| HLA-B*07:02 | LR      | 0.9877 | 0.9219 | 0.9846 | 0.9087 | 0.9535 |
|             | SVM     | 0.9731 | 0.9219 | 0.9846 | 0.9087 | 0.9535 |
|             | Bagging | 0.9510 | 0.9219 | 0.9846 | 0.9087 | 0.9535 |
|             | XGBoost | 0.9647 | 0.9219 | 0.9846 | 0.9087 | 0.9535 |
|             | KNN     | 0.9502 | 0.9219 | 0.9846 | 0.9087 | 0.9535 |
|             | Dtree   | 0.9532 | 0.9219 | 0.9846 | 0.9087 | 0.9535 |
|             | NB      | 0.9964 | 0.8906 | 0.9846 | 0.8797 | 0.9380 |
| HLA-B*15:01 | LR      | 0.8808 | 0.8627 | 0.8269 | 0.6899 | 0.8447 |
|             | SVM     | 0.8741 | 0.8627 | 0.8654 | 0.7281 | 0.8641 |
|             | Bagging | 0.9123 | 0.8824 | 0.8654 | 0.7477 | 0.8738 |
|             | XGBoost | 0.9121 | 0.8431 | 0.9038 | 0.7487 | 0.8738 |
|             | KNN     | 0.8431 | 0.9216 | 0.7115 | 0.6467 | 0.8155 |
|             | Dtree   | 0.8927 | 0.8431 | 0.9423 | 0.7899 | 0.8932 |
|             | NB      | 0.8397 | 0.8627 | 0.8654 | 0.7281 | 0.8641 |
| HLA-B*27:01 | LR      | 0.9444 | 0.9444 | 0.9474 | 0.8918 | 0.9459 |
|             | SVM     | 0.9415 | 0.9444 | 0.9474 | 0.8918 | 0.9459 |
|             | Bagging | 0.9722 | 0.9444 | 0.9474 | 0.8918 | 0.9459 |

|             |         |        |        |        |        |        |
|-------------|---------|--------|--------|--------|--------|--------|
|             | XGBoost | 0.9459 | 0.9444 | 0.9474 | 0.8918 | 0.9459 |
|             | KNN     | 0.9459 | 0.9444 | 0.9474 | 0.8918 | 0.9459 |
|             | Dtree   | 0.9459 | 0.9444 | 0.9474 | 0.8918 | 0.9459 |
|             | NB      | 0.9342 | 0.9444 | 0.9474 | 0.8918 | 0.9459 |
| HLA-B*27:02 | LR      | 1.0000 | 1.0000 | 1.0000 | 1.0000 | 1.0000 |
|             | SVM     | 1.0000 | 1.0000 | 0.9643 | 0.9643 | 0.9818 |
|             | Bagging | 1.0000 | 1.0000 | 1.0000 | 1.0000 | 1.0000 |
|             | XGBoost | 1.0000 | 1.0000 | 1.0000 | 1.0000 | 1.0000 |
|             | KNN     | 1.0000 | 1.0000 | 0.8929 | 0.8964 | 0.9455 |
|             | Dtree   | 1.0000 | 1.0000 | 1.0000 | 1.0000 | 1.0000 |
|             | NB      | 1.0000 | 1.0000 | 1.0000 | 1.0000 | 1.0000 |
| HLA-B*27:05 | LR      | 0.8058 | 0.6798 | 0.8659 | 0.5555 | 0.7730 |
|             | SVM     | 0.7988 | 0.5870 | 0.9093 | 0.5243 | 0.7483 |
|             | Bagging | 0.7882 | 0.6897 | 0.8540 | 0.5513 | 0.7720 |
|             | XGBoost | 0.8225 | 0.7431 | 0.7416 | 0.4847 | 0.7423 |
|             | KNN     | 0.7728 | 0.6937 | 0.8560 | 0.5571 | 0.7749 |
|             | Dtree   | 0.7630 | 0.6838 | 0.8422 | 0.5328 | 0.7631 |
|             | NB      | 0.8064 | 0.6581 | 0.8777 | 0.5493 | 0.7680 |
| HLA-B*27:08 | LR      | 1.0000 | 1.0000 | 1.0000 | 1.0000 | 1.0000 |
|             | SVM     | 1.0000 | 1.0000 | 1.0000 | 1.0000 | 1.0000 |
|             | Bagging | 1.0000 | 1.0000 | 0.8750 | 0.8787 | 0.9355 |
|             | XGBoost | 1.0000 | 1.0000 | 1.0000 | 1.0000 | 1.0000 |
|             | KNN     | 1.0000 | 1.0000 | 1.0000 | 1.0000 | 1.0000 |
|             | Dtree   | 1.0000 | 1.0000 | 1.0000 | 1.0000 | 1.0000 |
|             | NB      | 0.9063 | 1.0000 | 0.5625 | 0.6193 | 0.7742 |
| HLA-B*27:09 | LR      | 0.8761 | 0.9444 | 0.7568 | 0.7125 | 0.8493 |
|             | SVM     | 0.9182 | 0.8333 | 0.7838 | 0.6176 | 0.8082 |
|             | Bagging | 0.8480 | 0.9167 | 0.7568 | 0.6811 | 0.8356 |
|             | XGBoost | 0.9032 | 0.9167 | 0.7568 | 0.6811 | 0.8356 |
|             | KNN     | 0.8532 | 0.9167 | 0.7568 | 0.6811 | 0.8356 |
|             | Dtree   | 0.7830 | 0.9444 | 0.6216 | 0.5964 | 0.7808 |
|             | NB      | 0.8739 | 0.7222 | 0.8649 | 0.5938 | 0.7945 |
| HLA-B*35:01 | LR      | 0.8791 | 1.0000 | 0.7222 | 0.7470 | 0.8571 |
|             | SVM     | 0.9346 | 0.9412 | 0.7778 | 0.7261 | 0.8571 |
|             | Bagging | 0.8170 | 0.8235 | 0.7778 | 0.6013 | 0.8000 |
|             | XGBoost | 0.8301 | 0.8824 | 0.7778 | 0.6623 | 0.8286 |
|             | KNN     | 0.7745 | 0.8235 | 0.7222 | 0.5475 | 0.7714 |
|             | Dtree   | 0.7974 | 0.7059 | 0.8889 | 0.6068 | 0.8000 |
|             | NB      | 0.8791 | 0.8824 | 0.8333 | 0.7157 | 0.8571 |
| HLA-B*44:02 | LR      | 0.9524 | 0.9048 | 1.0000 | 0.9107 | 0.9535 |
|             | SVM     | 0.9957 | 0.9048 | 1.0000 | 0.9107 | 0.9535 |
|             | Bagging | 0.9416 | 0.9048 | 0.7727 | 0.6819 | 0.8372 |
|             | XGBoost | 0.9524 | 0.9048 | 1.0000 | 0.9107 | 0.9535 |
|             | KNN     | 0.9524 | 0.9048 | 1.0000 | 0.9107 | 0.9535 |



|             |         |        |        |        |        |        |
|-------------|---------|--------|--------|--------|--------|--------|
|             | Dtree   | 0.8387 | 0.9048 | 0.7727 | 0.6819 | 0.8372 |
|             | NB      | 0.9459 | 0.9048 | 1.0000 | 0.9107 | 0.9535 |
| HLA-B*51:01 | LR      | 0.9810 | 0.9000 | 0.9524 | 0.8544 | 0.9268 |
|             | SVM     | 0.9643 | 0.9000 | 0.9524 | 0.8544 | 0.9268 |
|             | Bagging | 0.9250 | 0.9000 | 0.9524 | 0.8544 | 0.9268 |
|             | XGBoost | 0.9214 | 0.9000 | 0.9524 | 0.8544 | 0.9268 |
|             | KNN     | 0.9238 | 0.9000 | 0.9524 | 0.8544 | 0.9268 |
|             | Dtree   | 0.9262 | 0.9000 | 0.9524 | 0.8544 | 0.9268 |
|             | NB      | 0.9333 | 0.9000 | 0.9524 | 0.8544 | 0.9268 |
| HLA-B*57:01 | LR      | 0.8900 | 0.8704 | 0.9141 | 0.7853 | 0.8923 |
|             | SVM     | 0.8669 | 0.8580 | 0.9325 | 0.7929 | 0.8954 |
|             | Bagging | 0.9043 | 0.8395 | 0.9202 | 0.7624 | 0.8800 |
|             | XGBoost | 0.8933 | 0.8086 | 0.9325 | 0.7471 | 0.8708 |
|             | KNN     | 0.8995 | 0.8580 | 0.9325 | 0.7929 | 0.8954 |
|             | Dtree   | 0.8612 | 0.7654 | 0.9571 | 0.7365 | 0.8615 |
|             | NB      | 0.9094 | 0.8580 | 0.9264 | 0.7864 | 0.8923 |
| HLA-B*57:03 | LR      | 0.9286 | 0.9500 | 0.7619 | 0.7223 | 0.8537 |
|             | SVM     | 0.8024 | 0.9500 | 0.7619 | 0.7223 | 0.8537 |
|             | Bagging | 0.8643 | 0.9500 | 0.7619 | 0.7223 | 0.8537 |
|             | XGBoost | 0.8762 | 0.9000 | 0.7619 | 0.6667 | 0.8293 |
|             | KNN     | 0.8321 | 0.9500 | 0.7619 | 0.7223 | 0.8537 |
|             | Dtree   | 0.8310 | 0.9000 | 0.7619 | 0.6667 | 0.8293 |
|             | NB      | 0.9643 | 0.9500 | 0.7619 | 0.7223 | 0.8537 |
| HLA-B*58:01 | LR      | 0.6550 | 0.5556 | 1.0000 | 0.6253 | 0.7838 |
|             | SVM     | 0.9123 | 0.8333 | 0.8947 | 0.7302 | 0.8649 |
|             | Bagging | 0.9064 | 0.5556 | 1.0000 | 0.6253 | 0.7838 |
|             | XGBoost | 0.8787 | 0.7778 | 0.8421 | 0.6217 | 0.8108 |
|             | KNN     | 0.8553 | 0.8333 | 0.8947 | 0.7302 | 0.8649 |
|             | Dtree   | 0.8392 | 0.8889 | 0.7895 | 0.6804 | 0.8378 |
|             | NB      | 0.7076 | 0.9444 | 0.4737 | 0.4706 | 0.7027 |
| HLA-C*04:01 | LR      | 0.6660 | 0.5909 | 0.8696 | 0.4809 | 0.7333 |
|             | SVM     | 0.8123 | 0.5909 | 0.8696 | 0.4809 | 0.7333 |
|             | Bagging | 0.7381 | 0.6364 | 0.6522 | 0.2885 | 0.6444 |
|             | XGBoost | 0.6798 | 0.5909 | 0.8261 | 0.4299 | 0.7111 |
|             | KNN     | 0.7105 | 0.5909 | 0.8696 | 0.4809 | 0.7333 |
|             | Dtree   | 0.7085 | 0.5909 | 0.8261 | 0.4299 | 0.7111 |
|             | NB      | 0.7648 | 0.5909 | 0.8696 | 0.4809 | 0.7333 |
| HLA-C*05:01 | LR      | 0.9083 | 0.8667 | 0.8750 | 0.7417 | 0.8710 |
|             | SVM     | 0.9583 | 0.8667 | 0.8750 | 0.7417 | 0.8710 |
|             | Bagging | 0.9042 | 0.7333 | 0.8750 | 0.6161 | 0.8065 |
|             | XGBoost | 0.8354 | 0.7333 | 0.9375 | 0.6883 | 0.8387 |
|             | KNN     | 0.8938 | 0.8667 | 0.8750 | 0.7417 | 0.8710 |
|             | Dtree   | 0.8354 | 0.7333 | 0.9375 | 0.6883 | 0.8387 |
|             | NB      | 0.8833 | 0.8667 | 0.8750 | 0.7417 | 0.8710 |

|             |             |         |        |        |        |        |        |
|-------------|-------------|---------|--------|--------|--------|--------|--------|
| 14          | HLA-C*06:02 | LR      | 0.8129 | 0.1333 | 1.0000 | 0.2693 | 0.5738 |
|             |             | SVM     | 0.8118 | 0.3667 | 0.9677 | 0.4206 | 0.6721 |
|             |             | Bagging | 0.7151 | 0.3000 | 0.9677 | 0.3616 | 0.6393 |
|             |             | XGBoost | 0.6656 | 0.3667 | 0.9032 | 0.3209 | 0.6393 |
|             |             | KNN     | 0.5355 | 0.1000 | 1.0000 | 0.2312 | 0.5574 |
|             |             | Dtree   | 0.6683 | 0.4333 | 0.9032 | 0.3825 | 0.6721 |
|             |             | NB      | 0.6978 | 0.5667 | 0.6452 | 0.2125 | 0.6066 |
|             | HLA-A*01:01 | LR      | 0.9951 | 0.9804 | 0.9808 | 0.9612 | 0.9806 |
|             |             | SVM     | 0.9834 | 0.9804 | 0.9808 | 0.9612 | 0.9806 |
|             |             | Bagging | 0.9798 | 0.9804 | 0.9423 | 0.9230 | 0.9612 |
|             |             | XGBoost | 0.9902 | 0.9804 | 0.9808 | 0.9612 | 0.9806 |
|             |             | KNN     | 0.9885 | 0.9804 | 0.9808 | 0.9612 | 0.9806 |
|             |             | Dtree   | 0.9613 | 0.9804 | 0.9423 | 0.9230 | 0.9612 |
|             |             | NB      | 0.9789 | 0.9804 | 0.9808 | 0.9612 | 0.9806 |
|             | HLA-A*02:01 | LR      | 0.8582 | 0.8431 | 0.8846 | 0.7286 | 0.8641 |
|             |             | SVM     | 0.8560 | 0.8431 | 0.8846 | 0.7286 | 0.8641 |
|             |             | Bagging | 0.8818 | 0.8235 | 0.9038 | 0.7301 | 0.8641 |
|             |             | XGBoost | 0.8778 | 0.8431 | 0.9038 | 0.7487 | 0.8738 |
|             |             | KNN     | 0.8518 | 0.8431 | 0.8846 | 0.7286 | 0.8641 |
|             |             | Dtree   | 0.8641 | 0.8627 | 0.8654 | 0.7281 | 0.8641 |
|             |             | NB      | 0.8548 | 0.8431 | 0.8846 | 0.7286 | 0.8641 |
| HLA-A*24:02 | LR          | 0.7647  | 0.7500 | 1.0000 | 0.7792 | 0.8788 |        |
|             | SVM         | 0.9596  | 0.7500 | 1.0000 | 0.7792 | 0.8788 |        |
|             | Bagging     | 0.8235  | 0.8125 | 0.7647 | 0.5772 | 0.7879 |        |
|             | XGBoost     | 0.9963  | 0.7500 | 1.0000 | 0.7792 | 0.8788 |        |
|             | KNN         | 0.8750  | 0.7500 | 1.0000 | 0.7792 | 0.8788 |        |
|             | Dtree       | 0.7886  | 0.8125 | 0.7647 | 0.5772 | 0.7879 |        |
|             | NB          | 0.7647  | 0.7500 | 1.0000 | 0.7792 | 0.8788 |        |
| HLA-A*68:02 | LR          | 0.8801  | 0.8333 | 0.8421 | 0.6754 | 0.8378 |        |
|             | SVM         | 0.8509  | 0.9444 | 0.4211 | 0.4258 | 0.6757 |        |
|             | Bagging     | 0.8202  | 0.5000 | 0.8421 | 0.3653 | 0.6757 |        |
|             | XGBoost     | 0.6988  | 0.6111 | 0.8421 | 0.4671 | 0.7297 |        |
|             | KNN         | 0.8363  | 0.8889 | 0.7895 | 0.6804 | 0.8378 |        |
|             | Dtree       | 0.8655  | 0.8889 | 0.8421 | 0.7310 | 0.8649 |        |
|             | NB          | 0.8246  | 0.8889 | 0.8421 | 0.7310 | 0.8649 |        |
| HLA-B*07:02 | LR          | 0.9008  | 0.9143 | 0.2222 | 0.1886 | 0.5634 |        |
|             | SVM         | 0.9087  | 0.9143 | 0.2778 | 0.2483 | 0.5915 |        |
|             | Bagging     | 0.8722  | 0.7714 | 1.0000 | 0.7945 | 0.8873 |        |
|             | XGBoost     | 0.9603  | 0.7714 | 1.0000 | 0.7945 | 0.8873 |        |
|             | KNN         | 0.9226  | 0.8857 | 0.9722 | 0.8621 | 0.9296 |        |
|             | Dtree       | 0.9012  | 0.8857 | 0.9167 | 0.8030 | 0.9014 |        |
|             | NB          | 0.9857  | 0.9429 | 1.0000 | 0.9451 | 0.9718 |        |
| HLA-B*15:01 | LR          | 0.8532  | 0.8750 | 0.8788 | 0.7538 | 0.8769 |        |
|             | SVM         | 0.8911  | 0.8750 | 0.8788 | 0.7538 | 0.8769 |        |

|             |         |        |        |        |        |        |
|-------------|---------|--------|--------|--------|--------|--------|
|             | Bagging | 0.8849 | 0.9063 | 0.7879 | 0.6981 | 0.8462 |
|             | XGBoost | 0.9257 | 0.9063 | 0.8788 | 0.7850 | 0.8923 |
|             | KNN     | 0.8911 | 0.8750 | 0.8788 | 0.7538 | 0.8769 |
|             | Dtree   | 0.8769 | 0.8750 | 0.8788 | 0.7538 | 0.8769 |
|             | NB      | 0.8684 | 0.8750 | 0.8788 | 0.7538 | 0.8769 |
| HLA-B*27:05 | LR      | 0.8296 | 0.7421 | 0.7559 | 0.4981 | 0.7490 |
|             | SVM     | 0.7465 | 0.7237 | 0.7664 | 0.4905 | 0.7451 |
|             | Bagging | 0.8094 | 0.7395 | 0.7270 | 0.4665 | 0.7332 |
|             | XGBoost | 0.7558 | 0.7132 | 0.7795 | 0.4938 | 0.7464 |
|             | KNN     | 0.7428 | 0.7263 | 0.7638 | 0.4905 | 0.7451 |
|             | Dtree   | 0.7267 | 0.7263 | 0.7270 | 0.4533 | 0.7267 |
|             | NB      | 0.7255 | 0.7263 | 0.7638 | 0.4905 | 0.7451 |
| HLA-B*27:09 | LR      | 0.7338 | 0.7600 | 0.8077 | 0.5686 | 0.7843 |
|             | SVM     | 0.7523 | 0.7600 | 0.8077 | 0.5686 | 0.7843 |
|             | Bagging | 0.7892 | 0.7600 | 0.8462 | 0.6090 | 0.8039 |
|             | XGBoost | 0.7715 | 0.7600 | 0.7308 | 0.4908 | 0.7451 |
|             | KNN     | 0.7700 | 0.7600 | 0.8077 | 0.5686 | 0.7843 |
|             | Dtree   | 0.7646 | 0.7600 | 0.7692 | 0.5292 | 0.7647 |
|             | NB      | 0.8092 | 0.7200 | 0.8462 | 0.5715 | 0.7843 |
| HLA-B*35:01 | LR      | 0.9375 | 0.9333 | 1.0000 | 0.9372 | 0.9677 |
|             | SVM     | 1.0000 | 0.9333 | 1.0000 | 0.9372 | 0.9677 |
|             | Bagging | 1.0000 | 0.8000 | 1.0000 | 0.8208 | 0.9032 |
|             | XGBoost | 0.9771 | 0.9333 | 1.0000 | 0.9372 | 0.9677 |
|             | KNN     | 0.9646 | 0.9333 | 1.0000 | 0.9372 | 0.9677 |
|             | Dtree   | 0.9354 | 0.9333 | 0.9375 | 0.8708 | 0.9355 |
|             | NB      | 0.9375 | 0.9333 | 1.0000 | 0.9372 | 0.9677 |
| HLA-B*57:01 | LR      | 0.7806 | 0.7978 | 0.7889 | 0.5866 | 0.7933 |
|             | SVM     | 0.8228 | 0.7978 | 0.7889 | 0.5866 | 0.7933 |
|             | Bagging | 0.7747 | 0.7191 | 0.8000 | 0.5209 | 0.7598 |
|             | XGBoost | 0.8625 | 0.7640 | 0.8000 | 0.5645 | 0.7821 |
|             | KNN     | 0.8340 | 0.6966 | 0.8889 | 0.5970 | 0.7933 |
|             | Dtree   | 0.7428 | 0.7079 | 0.7778 | 0.4869 | 0.7430 |
|             | NB      | 0.7464 | 0.6854 | 0.8333 | 0.5247 | 0.7598 |
| HLA-C*04:01 | LR      | 0.8368 | 0.7895 | 0.8000 | 0.5895 | 0.7949 |
|             | SVM     | 0.7842 | 0.7895 | 0.8000 | 0.5895 | 0.7949 |
|             | Bagging | 0.8421 | 0.7895 | 0.7500 | 0.5395 | 0.7692 |
|             | XGBoost | 0.8461 | 0.7368 | 0.8500 | 0.5915 | 0.7949 |
|             | KNN     | 0.7382 | 1.0000 | 0.4500 | 0.5339 | 0.7179 |
|             | Dtree   | 0.7487 | 0.9474 | 0.5500 | 0.5386 | 0.7436 |
|             | NB      | 0.7684 | 0.7895 | 0.8000 | 0.5895 | 0.7949 |
| HLA-C*05:01 | LR      | 0.8272 | 1.0000 | 0.2353 | 0.3603 | 0.6061 |
|             | SVM     | 0.6544 | 0.5000 | 0.5882 | 0.0886 | 0.5455 |
|             | Bagging | 0.6085 | 0.5000 | 0.6471 | 0.1487 | 0.5758 |
|             | XGBoost | 0.6654 | 0.5000 | 0.6471 | 0.1487 | 0.5758 |

|             |         |        |        |        |        |        |
|-------------|---------|--------|--------|--------|--------|--------|
|             | KNN     | 0.5938 | 0.5000 | 0.6471 | 0.1487 | 0.5758 |
|             | Dtree   | 0.6029 | 0.5000 | 0.7059 | 0.2106 | 0.6061 |
|             | NB      | 0.8125 | 0.9375 | 0.2941 | 0.3001 | 0.6061 |
| HLA-C*06:02 | LR      | 0.7943 | 0.7222 | 0.7568 | 0.4793 | 0.7397 |
|             | SVM     | 0.7935 | 0.6667 | 0.7568 | 0.4253 | 0.7123 |
|             | Bagging | 0.7121 | 0.5278 | 0.8378 | 0.3852 | 0.6849 |
|             | XGBoost | 0.7406 | 0.5278 | 0.8378 | 0.3852 | 0.6849 |
|             | KNN     | 0.7245 | 0.6667 | 0.7568 | 0.4253 | 0.7123 |
|             | Dtree   | 0.6288 | 0.5278 | 0.7297 | 0.2631 | 0.6301 |
|             | NB      | 0.7035 | 0.6111 | 0.7838 | 0.4013 | 0.6986 |

## Supplementary Table S4

Performance comparison of HLAB, Anthem, MixMHCpred 2.0.1, NetMHCpan 4.1, NetMHCcons 1.1, NetMHCstabpan 1.0, MHCNetSeq, ACME, and DeepSeqPan on the independent test dataset.

| Length | HLA-I       | Tool              | AUC    | Sn     | Sp     | ACC    | MCC    |
|--------|-------------|-------------------|--------|--------|--------|--------|--------|
| 8      | HLA-A*01:01 | HLAB              | 0.9945 | 0.9552 | 0.9559 | 0.9556 | 0.9111 |
|        |             | Anthem            | 0.9720 | 0.8450 | 0.9480 | 0.8960 | 0.7970 |
|        |             | NetMHCpan-4.1     | 0.9650 | 0.9130 | 0.9250 | 0.9190 | 0.8400 |
|        |             | MHCNetSeq         | 0.9590 | 0.9250 | 0.9280 | 0.9270 | 0.8550 |
|        |             | NetMHCcons-1.1    | 0.9390 | 0.8670 | 0.8870 | 0.8770 | 0.7550 |
|        |             | NetMHCstabpan-1.0 | 0.9340 | 0.8580 | 0.8880 | 0.8730 | 0.7470 |
|        |             | MixMHCpred-2.0.2  | 0.9280 | 0.8600 | 0.8840 | 0.8720 | 0.7440 |
|        |             | ACME              | 0.9170 | 0.8570 | 0.8810 | 0.8690 | 0.7380 |

|             |                    |        |        |        |        |        |
|-------------|--------------------|--------|--------|--------|--------|--------|
| HLA-A*02:01 | HLAB               | 0.9188 | 0.8862 | 0.8797 | 0.8730 | 0.7460 |
|             | Anthem             | 0.9110 | 0.8060 | 0.9020 | 0.8540 | 0.7120 |
|             | ACME               | 0.9110 | 0.8500 | 0.8500 | 0.8500 | 0.7000 |
|             | NetMHCcons-1.1     | 0.9070 | 0.8230 | 0.8780 | 0.8500 | 0.7020 |
|             | NetMHCstabpan-1.00 | 0.9030 | 0.8260 | 0.8680 | 0.8470 | 0.6950 |
|             | MixMHCpred-2.0.2   | 0.9010 | 0.8420 | 0.8450 | 0.8440 | 0.6880 |
|             | NetMHCpan-4.1      | 0.9010 | 0.8230 | 0.8770 | 0.8500 | 0.7010 |
|             | MHCNetSeq          | 0.8870 | 0.7980 | 0.8710 | 0.8350 | 0.6720 |
| HLA-A*03:01 | HLAB               | 0.9825 | 0.9474 | 0.9483 | 0.9478 | 0.8956 |
|             | NetMHCpan-4.1      | 0.9760 | 0.9650 | 0.9630 | 0.9640 | 0.9280 |
|             | NetMHCcons-1.1     | 0.9750 | 0.9630 | 0.9740 | 0.9680 | 0.9370 |
|             | NetMHCstabpan-1.00 | 0.9750 | 0.9650 | 0.9670 | 0.9660 | 0.9320 |
|             | MixMHCpred-2.0.2   | 0.9720 | 0.9650 | 0.9070 | 0.9360 | 0.8740 |
|             | Anthem             | 0.9680 | 0.9470 | 0.9300 | 0.9390 | 0.8780 |
|             | ACME               | 0.9630 | 0.9420 | 0.9590 | 0.9510 | 0.9020 |
|             | MHCNetSeq          | 0.9470 | 0.9310 | 0.8950 | 0.9130 | 0.8270 |
| HLA-A*11:01 | MHCNetSeq          | 0.9790 | 0.9350 | 0.9710 | 0.9530 | 0.9100 |
|             | NetMHCstabpan-1.00 | 0.9740 | 0.9590 | 0.9180 | 0.9380 | 0.8840 |
|             | NetMHCcons-1.1     | 0.9720 | 0.9410 | 0.9180 | 0.9290 | 0.8650 |
|             | NetMHCpan-4.1      | 0.9680 | 0.9000 | 0.9350 | 0.9180 | 0.8370 |
|             | HLAB               | 0.9575 | 0.8824 | 0.8333 | 0.8571 | 0.7157 |
|             | ACME               | 0.9560 | 0.8940 | 0.9290 | 0.9120 | 0.8260 |
|             | Anthem             | 0.9340 | 0.7880 | 0.9180 | 0.8530 | 0.7150 |
|             | MixMHCpred-2.0.2   | 0.9150 | 0.8880 | 0.8820 | 0.8850 | 0.7730 |
| HLA-A*24:02 | NetMHCpan-4.1      | 0.9720 | 0.9590 | 0.9180 | 0.9390 | 0.8790 |
|             | NetMHCcons-1.1     | 0.9690 | 0.9390 | 0.9230 | 0.9310 | 0.8620 |
|             | NetMHCstabpan-1.00 | 0.9690 | 0.9480 | 0.9050 | 0.9260 | 0.8530 |
|             | HLAB               | 0.9611 | 0.8409 | 0.9333 | 0.8876 | 0.7782 |
|             | MixMHCpred-2.0.2   | 0.9610 | 0.9140 | 0.9270 | 0.9200 | 0.8410 |
|             | Anthem             | 0.9590 | 0.8500 | 0.9290 | 0.8890 | 0.7850 |
|             | ACME               | 0.9590 | 0.9020 | 0.9140 | 0.9080 | 0.8180 |
|             | MHCNetSeq          | 0.9400 | 0.8860 | 0.8980 | 0.8920 | 0.7850 |
| HLA-A*29:02 | HLAB               | 0.9847 | 0.9669 | 0.9396 | 0.9532 | 0.9067 |
|             | NetMHCpan-4.1      | 0.9820 | 0.9900 | 0.9450 | 0.9680 | 0.9360 |
|             | NetMHCcons-1.1     | 0.9820 | 0.9720 | 0.9420 | 0.9580 | 0.9160 |
|             | NetMHCstabpan-1.00 | 0.9790 | 0.9670 | 0.9400 | 0.9540 | 0.9090 |
|             | ACME               | 0.9730 | 0.9300 | 0.9350 | 0.9320 | 0.8650 |
|             | MixMHCpred-2.0.2   | 0.9690 | 0.9100 | 0.9630 | 0.9360 | 0.8740 |
|             | Anthem             | 0.9600 | 0.9200 | 0.8950 | 0.9070 | 0.8180 |
|             | MHCNetSeq          | 0.9410 | 0.8750 | 0.8780 | 0.8760 | 0.7540 |
| HLA-B*07:02 | NetMHCpan-4.1      | 0.9860 | 0.9440 | 0.9590 | 0.9520 | 0.9030 |
|             | HLAB               | 0.9847 | 0.9669 | 0.9396 | 0.9532 | 0.9067 |
|             | NetMHCcons-1.1     | 0.9810 | 0.9420 | 0.9410 | 0.9410 | 0.8830 |
|             | NetMHCstabpan-1.00 | 0.9810 | 0.9360 | 0.9490 | 0.9430 | 0.8850 |

|             |                    |        |        |        |        |        |
|-------------|--------------------|--------|--------|--------|--------|--------|
|             | MixMHCpred-2.0.2   | 0.9800 | 0.9240 | 0.9440 | 0.9340 | 0.8690 |
|             | ACME               | 0.9800 | 0.9420 | 0.9450 | 0.9440 | 0.8870 |
|             | MHCNetSeq          | 0.9800 | 0.9180 | 0.9630 | 0.9410 | 0.8830 |
|             | Anthem             | 0.9750 | 0.9440 | 0.9550 | 0.9490 | 0.8980 |
| HLA-B*08:01 | NetMHCpan-4.1      | 0.9940 | 0.9820 | 0.9770 | 0.9800 | 0.9590 |
|             | HLAB               | 0.9912 | 0.9913 | 0.9655 | 0.9784 | 0.9571 |
|             | Anthem             | 0.9900 | 0.9510 | 0.9590 | 0.9550 | 0.9100 |
|             | NetMHCcons-1.1     | 0.9900 | 0.9740 | 0.9650 | 0.9700 | 0.9390 |
|             | NetMHCstabpan-1.00 | 0.9890 | 0.9760 | 0.9610 | 0.9680 | 0.9360 |
|             | MixMHCpred-2.0.2   | 0.9870 | 0.9370 | 0.9540 | 0.9450 | 0.8910 |
|             | ACME               | 0.9840 | 0.9770 | 0.9580 | 0.9670 | 0.9350 |
|             | MHCNetSeq          | 0.9790 | 0.9540 | 0.9330 | 0.9430 | 0.8870 |
| HLA-B*13:02 | HLAB               | 1.0000 | 1.0000 | 1.0000 | 1.0000 | 1.0000 |
|             | NetMHCpan-4.1      | 0.9960 | 0.9860 | 0.9930 | 0.9890 | 0.9790 |
|             | NetMHCstabpan-1.00 | 0.9950 | 1.0000 | 0.9930 | 0.9960 | 0.9930 |
|             | NetMHCcons-1.1     | 0.9940 | 1.0000 | 0.9930 | 0.9960 | 0.9930 |
|             | MixMHCpred-2.0.2   | 0.9860 | 0.9220 | 0.9930 | 0.9570 | 0.9180 |
|             | ACME               | 0.9780 | 0.9930 | 0.9570 | 0.9750 | 0.9510 |
|             | MHCNetSeq          | 0.9710 | 0.9640 | 0.9070 | 0.9360 | 0.8760 |
|             | Anthem             | 0.9560 | 0.8570 | 0.9990 | 0.9280 | 0.8640 |
| HLA-B*14:02 | NetMHCpan-4.1      | 0.9960 | 0.9930 | 0.9830 | 0.9880 | 0.9760 |
|             | Anthem             | 0.9950 | 0.9240 | 0.9750 | 0.9500 | 0.9010 |
|             | HLAB               | 0.9935 | 0.9811 | 0.9813 | 0.9812 | 0.9624 |
|             | NetMHCstabpan-1.00 | 0.9930 | 0.9790 | 0.9750 | 0.9770 | 0.9550 |
|             | NetMHCcons-1.1     | 0.9910 | 0.9780 | 0.9700 | 0.9740 | 0.9480 |
|             | MixMHCpred-2.0.2   | 0.9890 | 0.9320 | 0.9660 | 0.9490 | 0.8990 |
|             | ACME               | 0.9840 | 0.9490 | 0.9490 | 0.9490 | 0.8980 |
|             | MHCNetSeq          | 0.9570 | 0.9620 | 0.8620 | 0.9120 | 0.8290 |
| HLA-B*15:01 | NetMHCpan-4.1      | 0.9850 | 0.9420 | 0.9590 | 0.9500 | 0.9010 |
|             | MHCNetSeq          | 0.9850 | 0.9440 | 0.9420 | 0.9430 | 0.8860 |
|             | Anthem             | 0.9810 | 0.9200 | 0.9540 | 0.9370 | 0.8740 |
|             | MixMHCpred-2.0.2   | 0.9810 | 0.9500 | 0.9330 | 0.9410 | 0.8830 |
|             | NetMHCstabpan-1.00 | 0.9750 | 0.9230 | 0.9440 | 0.9340 | 0.8680 |
|             | HLAB               | 0.9745 | 0.9375 | 0.8850 | 0.9111 | 0.8234 |
|             | NetMHCcons-1.1     | 0.9730 | 0.9120 | 0.9450 | 0.9280 | 0.8570 |
|             | ACME               | 0.9730 | 0.9210 | 0.9610 | 0.9410 | 0.8830 |
| HLA-B*18:01 | Anthem             | 0.9910 | 0.9600 | 0.9870 | 0.9730 | 0.9480 |
|             | ACME               | 0.9910 | 0.9830 | 0.9910 | 0.9870 | 0.9740 |
|             | NetMHCcons-1.1     | 0.9890 | 0.9810 | 0.9880 | 0.9840 | 0.9690 |
|             | MixMHCpred-2.0.2   | 0.9870 | 0.9710 | 0.9830 | 0.9770 | 0.9540 |
|             | NetMHCpan-4.1      | 0.9870 | 0.9770 | 0.9910 | 0.9840 | 0.9690 |
|             | NetMHCstabpan-1.00 | 0.9870 | 0.9760 | 0.9800 | 0.9780 | 0.9560 |
|             | HLAB               | 0.9849 | 0.9810 | 0.9717 | 0.9763 | 0.9527 |
|             | MHCNetSeq          | 0.9840 | 0.9720 | 0.9500 | 0.9610 | 0.9230 |

|             |                    |        |        |        |        |        |
|-------------|--------------------|--------|--------|--------|--------|--------|
| HLA-B*18:03 | HLAB               | 1.0000 | 1.0000 | 0.9545 | 0.9767 | 0.9545 |
|             | MixMHCpred-2.0.2   | 0.9990 | 1.0000 | 0.9810 | 0.9900 | 0.9810 |
|             | NetMHCstabpan-1.00 | 0.9980 | 1.0000 | 0.9950 | 0.9980 | 0.9950 |
|             | NetMHCpan-4.1      | 0.9970 | 1.0000 | 0.9950 | 0.9980 | 0.9950 |
|             | NetMHCcons-1.1     | 0.9970 | 1.0000 | 0.9950 | 0.9980 | 0.9950 |
|             | ACME               | 0.9960 | 0.9900 | 0.9860 | 0.9880 | 0.9760 |
|             | MHCNetSeq          | 0.9940 | 1.0000 | 0.9280 | 0.9640 | 0.9320 |
|             | Anthem             | 0.9780 | 0.9330 | 0.9840 | 0.9580 | 0.9190 |
| HLA-B*27:05 | Anthem             | 0.8320 | 0.6970 | 0.7780 | 0.7380 | 0.4780 |
|             | HLAB               | 0.8317 | 0.8013 | 0.7580 | 0.7796 | 0.5597 |
|             | MHCNetSeq          | 0.7270 | 0.6080 | 0.7370 | 0.6730 | 0.3480 |
|             | NetMHCstabpan-1.00 | 0.7230 | 0.5880 | 0.7680 | 0.6780 | 0.3630 |
|             | NetMHCcons-1.1     | 0.7170 | 0.5880 | 0.7400 | 0.6640 | 0.3340 |
|             | MixMHCpred-2.0.2   | 0.7160 | 0.5780 | 0.7530 | 0.6650 | 0.3390 |
|             | NetMHCpan-4.1      | 0.7130 | 0.6230 | 0.7330 | 0.6780 | 0.3580 |
|             | ACME               | 0.7040 | 0.5730 | 0.7830 | 0.6780 | 0.3670 |
| HLA-B*27:09 | HLAB               | 0.9857 | 0.9500 | 0.9048 | 0.9268 | 0.8548 |
|             | Anthem             | 0.9070 | 0.7500 | 0.8810 | 0.8160 | 0.6470 |
|             | NetMHCpan-4.1      | 0.8370 | 0.8600 | 0.7650 | 0.8120 | 0.6320 |
|             | MixMHCpred-2.0.2   | 0.7900 | 0.7000 | 0.7900 | 0.7450 | 0.4950 |
|             | NetMHCcons-1.1     | 0.6780 | 0.7650 | 0.6300 | 0.6980 | 0.4050 |
|             | NetMHCstabpan-1.00 | 0.6760 | 0.7700 | 0.6200 | 0.6950 | 0.3990 |
|             | MHCNetSeq          | 0.5590 | 0.5500 | 0.6000 | 0.5750 | 0.1560 |
|             | ACME               | 0.5580 | 0.6850 | 0.5100 | 0.5980 | 0.2010 |
| HLA-B*35:01 | HLAB               | 0.9512 | 0.8261 | 0.8936 | 0.8602 | 0.7217 |
|             | Anthem             | 0.9270 | 0.8220 | 0.9110 | 0.8670 | 0.7370 |
|             | MHCNetSeq          | 0.9120 | 0.9130 | 0.8390 | 0.8760 | 0.7550 |
|             | NetMHCpan-4.1      | 0.9110 | 0.8190 | 0.9070 | 0.8630 | 0.7290 |
|             | MixMHCpred-2.0.2   | 0.8970 | 0.8020 | 0.8850 | 0.8440 | 0.6930 |
|             | NetMHCstabpan-1.00 | 0.8950 | 0.8080 | 0.9020 | 0.8560 | 0.7140 |
|             | NetMHCcons-1.1     | 0.8940 | 0.8110 | 0.8850 | 0.8480 | 0.6980 |
|             | ACME               | 0.8910 | 0.7920 | 0.9000 | 0.8460 | 0.6970 |
| HLA-B*37:01 | NetMHCpan-4.1      | 0.9960 | 0.9960 | 0.9890 | 0.9930 | 0.9850 |
|             | NetMHCstabpan-1.00 | 0.9960 | 0.9880 | 0.9720 | 0.9800 | 0.9610 |
|             | NetMHCcons-1.1     | 0.9930 | 0.9750 | 0.9650 | 0.9700 | 0.9400 |
|             | HLAB               | 0.9923 | 0.9918 | 0.9837 | 0.9878 | 0.9755 |
|             | Anthem             | 0.9920 | 0.9280 | 0.9850 | 0.9570 | 0.9150 |
|             | ACME               | 0.9900 | 0.9590 | 0.9560 | 0.9570 | 0.9150 |
|             | MixMHCpred-2.0.2   | 0.9420 | 0.8750 | 0.8590 | 0.8670 | 0.7350 |
|             | MHCNetSeq          | 0.8730 | 0.7900 | 0.8130 | 0.8020 | 0.6040 |
| HLA-B*39:01 | NetMHCcons-1.1     | 0.9920 | 0.9810 | 0.9740 | 0.9780 | 0.9560 |
|             | ACME               | 0.9920 | 1.0000 | 0.9670 | 0.9830 | 0.9680 |
|             | NetMHCpan-4.1      | 0.9900 | 0.9700 | 0.9590 | 0.9640 | 0.9310 |
|             | NetMHCstabpan-1.00 | 0.9880 | 0.9630 | 0.9590 | 0.9610 | 0.9230 |

|             |                    |        |        |        |        |        |
|-------------|--------------------|--------|--------|--------|--------|--------|
|             | MHCNetSeq          | 0.9820 | 0.9410 | 0.9370 | 0.9390 | 0.8790 |
|             | HLAB               | 0.9683 | 0.8148 | 0.9643 | 0.8909 | 0.7896 |
|             | MixMHCpred-2.0.2   | 0.9560 | 0.8740 | 0.9110 | 0.8920 | 0.7870 |
|             | Anthem             | 0.9450 | 0.7780 | 0.9760 | 0.8770 | 0.7690 |
| HLA-B*39:24 | HLAB               | 1.0000 | 1.0000 | 1.0000 | 1.0000 | 1.0000 |
|             | MixMHCpred-2.0.2   | 0.9980 | 1.0000 | 0.9880 | 0.9940 | 0.9880 |
|             | NetMHCpan-4.1      | 0.9920 | 0.9760 | 0.9680 | 0.9720 | 0.9440 |
|             | Anthem             | 0.9910 | 0.9840 | 0.9620 | 0.9730 | 0.9480 |
|             | NetMHCcons-1.1     | 0.9900 | 1.0000 | 0.9720 | 0.9860 | 0.9730 |
|             | NetMHCstabpan-1.00 | 0.9900 | 1.0000 | 0.9680 | 0.9840 | 0.9690 |
|             | ACME               | 0.9850 | 0.9920 | 0.9560 | 0.9740 | 0.9500 |
|             | MHCNetSeq          | 0.9730 | 0.9320 | 0.9240 | 0.9280 | 0.8560 |
| HLA-B*40:01 | NetMHCpan-4.1      | 0.9950 | 0.9950 | 0.9760 | 0.9860 | 0.9720 |
|             | Anthem             | 0.9930 | 0.9900 | 0.9700 | 0.9800 | 0.9620 |
|             | NetMHCcons-1.1     | 0.9910 | 0.9860 | 0.9620 | 0.9740 | 0.9480 |
|             | NetMHCstabpan-1.00 | 0.9910 | 0.9950 | 0.9620 | 0.9790 | 0.9590 |
|             | ACME               | 0.9910 | 0.9810 | 0.9570 | 0.9690 | 0.9390 |
|             | HLAB               | 0.9848 | 1.0000 | 0.9545 | 0.9767 | 0.9545 |
|             | MixMHCpred-2.0.2   | 0.9820 | 0.9570 | 0.9470 | 0.9520 | 0.9070 |
|             | MHCNetSeq          | 0.9650 | 0.9190 | 0.9280 | 0.9240 | 0.8500 |
| HLA-B*40:02 | Anthem             | 0.9890 | 0.9570 | 0.9670 | 0.9620 | 0.9230 |
|             | MixMHCpred-2.0.2   | 0.9890 | 0.9570 | 0.9690 | 0.9630 | 0.9260 |
|             | NetMHCpan-4.1      | 0.9850 | 0.9650 | 0.9520 | 0.9580 | 0.9170 |
|             | HLAB               | 0.9829 | 0.9766 | 0.8867 | 0.9316 | 0.8667 |
|             | NetMHCcons-1.1     | 0.9800 | 0.9530 | 0.9420 | 0.9470 | 0.8950 |
|             | NetMHCstabpan-1.00 | 0.9780 | 0.9490 | 0.9280 | 0.9380 | 0.8780 |
|             | ACME               | 0.9760 | 0.9480 | 0.9240 | 0.9360 | 0.8730 |
|             | MHCNetSeq          | 0.9710 | 0.9800 | 0.7880 | 0.8840 | 0.7820 |
| HLA-B*44:02 | HLAB               | 0.9954 | 0.9310 | 1.0000 | 0.9661 | 0.9343 |
|             | MixMHCpred-2.0.2   | 0.9910 | 0.9690 | 0.9690 | 0.9690 | 0.9380 |
|             | NetMHCpan-4.1      | 0.9890 | 0.9760 | 0.9550 | 0.9660 | 0.9310 |
|             | NetMHCcons-1.1     | 0.9870 | 0.9630 | 0.9660 | 0.9640 | 0.9280 |
|             | NetMHCstabpan-1.00 | 0.9860 | 0.9380 | 0.9620 | 0.9500 | 0.9010 |
|             | ACME               | 0.9780 | 0.9350 | 0.9310 | 0.9330 | 0.8660 |
|             | Anthem             | 0.9700 | 0.8480 | 0.9470 | 0.8980 | 0.8000 |
|             | MHCNetSeq          | 0.9520 | 0.9380 | 0.9070 | 0.9230 | 0.8470 |
| HLA-B*44:03 | MHCNetSeq          | 0.9890 | 0.9470 | 0.9710 | 0.9590 | 0.9180 |
|             | NetMHCpan-4.1      | 0.9860 | 0.9570 | 0.9710 | 0.9640 | 0.9290 |
|             | NetMHCcons-1.1     | 0.9830 | 0.9610 | 0.9710 | 0.9660 | 0.9330 |
|             | HLAB               | 0.9729 | 0.9643 | 0.8621 | 0.9123 | 0.8294 |
|             | ACME               | 0.9780 | 0.9570 | 0.9710 | 0.9640 | 0.9290 |
|             | Anthem             | 0.9760 | 0.9640 | 0.9410 | 0.9530 | 0.9070 |
|             | NetMHCstabpan-1.00 | 0.9730 | 0.9610 | 0.9790 | 0.9690 | 0.9400 |
|             | MixMHCpred-2.0.2   | 0.9650 | 0.9570 | 0.9710 | 0.9640 | 0.9290 |



|             |                    |        |        |        |        |        |
|-------------|--------------------|--------|--------|--------|--------|--------|
| HLA-B*46:01 | MixMHCpred-2.0.2   | 0.9750 | 0.9000 | 0.9450 | 0.9230 | 0.8470 |
|             | NetMHCpan-4.1      | 0.9700 | 0.9600 | 0.9150 | 0.9380 | 0.8760 |
|             | HLAB               | 0.9667 | 1.0000 | 0.9048 | 0.9512 | 0.9069 |
|             | MHCNetSeq          | 0.9560 | 0.8900 | 0.9250 | 0.9080 | 0.8170 |
|             | NetMHCstabpan-1.00 | 0.9520 | 0.9450 | 0.8950 | 0.9200 | 0.8430 |
|             | NetMHCcons-1.1     | 0.9440 | 0.9350 | 0.8750 | 0.9050 | 0.8150 |
|             | ACME               | 0.9230 | 0.8700 | 0.8550 | 0.8630 | 0.7280 |
|             | Anthem             | 0.9200 | 0.8200 | 0.8840 | 0.8520 | 0.7120 |
| HLA-B*49:01 | NetMHCpan-4.1      | 0.9970 | 0.9920 | 0.9850 | 0.9880 | 0.9780 |
|             | Anthem             | 0.9930 | 0.9770 | 0.9760 | 0.9760 | 0.9520 |
|             | NetMHCcons-1.1     | 0.9930 | 0.9750 | 0.9860 | 0.9810 | 0.9610 |
|             | NetMHCstabpan-1.00 | 0.9930 | 0.9800 | 0.9780 | 0.9790 | 0.9590 |
|             | HLAB               | 0.9918 | 0.9766 | 0.9922 | 0.9844 | 0.9690 |
|             | ACME               | 0.9890 | 0.9780 | 0.9660 | 0.9720 | 0.9440 |
|             | MixMHCpred-2.0.2   | 0.9880 | 0.9650 | 0.9720 | 0.9690 | 0.9370 |
|             | MHCNetSeq          | 0.9700 | 0.9770 | 0.8480 | 0.9120 | 0.8320 |
| HLA-B*51:01 | NetMHCpan-4.1      | 0.9880 | 0.9660 | 0.9670 | 0.9670 | 0.9330 |
|             | Anthem             | 0.9800 | 0.9360 | 0.9520 | 0.9440 | 0.8880 |
|             | NetMHCcons-1.1     | 0.9740 | 0.9390 | 0.9500 | 0.9440 | 0.8890 |
|             | HLAB               | 0.9732 | 0.9638 | 0.9414 | 0.9526 | 0.9054 |
|             | MixMHCpred-2.0.2   | 0.9720 | 0.9390 | 0.9500 | 0.9440 | 0.8890 |
|             | NetMHCstabpan-1.00 | 0.9720 | 0.9370 | 0.9420 | 0.9390 | 0.8790 |
|             | ACME               | 0.9480 | 0.8730 | 0.9340 | 0.9040 | 0.8100 |
|             | MHCNetSeq          | 0.9430 | 0.8730 | 0.9020 | 0.8880 | 0.7760 |
| HLA-B*51:08 | MixMHCpred-2.0.2   | 0.9980 | 0.9940 | 0.9820 | 0.9880 | 0.9770 |
|             | NetMHCpan-4.1      | 0.9970 | 1.0000 | 0.9820 | 0.9910 | 0.9830 |
|             | Anthem             | 0.9870 | 0.9760 | 0.9850 | 0.9810 | 0.9620 |
|             | NetMHCcons-1.1     | 0.9840 | 0.9710 | 0.9590 | 0.9650 | 0.9300 |
|             | NetMHCstabpan-1.00 | 0.9840 | 0.9880 | 0.9590 | 0.9740 | 0.9480 |
|             | MHCNetSeq          | 0.9760 | 1.0000 | 0.3530 | 0.6770 | 0.4610 |
|             | HLAB               | 0.9739 | 1.0000 | 0.9444 | 0.9714 | 0.9444 |
|             | ACME               | 0.9690 | 0.9350 | 0.9590 | 0.9470 | 0.8950 |
| HLA-B*52:01 | Anthem             | 0.9820 | 0.9420 | 0.9850 | 0.9640 | 0.9280 |
|             | HLAB               | 0.9727 | 0.9737 | 0.9740 | 0.9739 | 0.9477 |
|             | NetMHCpan-4.1      | 0.9720 | 0.9650 | 0.9550 | 0.9600 | 0.9200 |
|             | MixMHCpred-2.0.2   | 0.9710 | 0.9270 | 0.9570 | 0.9420 | 0.8850 |
|             | NetMHCstabpan-1.00 | 0.9650 | 0.9220 | 0.9460 | 0.9340 | 0.8690 |
|             | NetMHCcons-1.1     | 0.9570 | 0.9290 | 0.9310 | 0.9300 | 0.8610 |
|             | ACME               | 0.9150 | 0.8420 | 0.8740 | 0.8580 | 0.7170 |
|             | MHCNetSeq          | 0.8830 | 0.8560 | 0.7810 | 0.8190 | 0.6410 |
| HLA-B*54:01 | HLAB               | 0.9823 | 0.8000 | 1.0000 | 0.9020 | 0.8191 |
|             | ACME               | 0.9080 | 0.8560 | 0.9440 | 0.9000 | 0.8040 |
|             | Anthem             | 0.9040 | 0.7920 | 0.9620 | 0.8770 | 0.7670 |
|             | NetMHCpan-4.1      | 0.8960 | 0.8400 | 0.9720 | 0.9060 | 0.8200 |

|             |                    |        |        |        |        |        |
|-------------|--------------------|--------|--------|--------|--------|--------|
|             | MixMHCpred-2.0.2   | 0.8920 | 0.8400 | 0.9600 | 0.9000 | 0.8060 |
|             | NetMHCcons-1.1     | 0.8700 | 0.8400 | 0.9800 | 0.9100 | 0.8290 |
|             | NetMHCstabpan-1.00 | 0.8600 | 0.8400 | 0.9840 | 0.9120 | 0.8330 |
|             | MHCNetSeq          | 0.7880 | 0.7440 | 0.7320 | 0.7380 | 0.4770 |
| HLA-B*57:01 | HLAB               | 0.9571 | 0.8642 | 0.9390 | 0.9018 | 0.8058 |
|             | Anthem             | 0.9230 | 0.8100 | 0.9330 | 0.8710 | 0.7490 |
|             | MHCNetSeq          | 0.9090 | 0.8120 | 0.8750 | 0.8440 | 0.6920 |
|             | NetMHCpan-4.1      | 0.8930 | 0.8050 | 0.8740 | 0.8400 | 0.6820 |
|             | ACME               | 0.8840 | 0.7700 | 0.9220 | 0.8470 | 0.7010 |
|             | NetMHCcons-1.1     | 0.8750 | 0.7800 | 0.8150 | 0.7980 | 0.5970 |
|             | NetMHCstabpan-1.00 | 0.8700 | 0.7660 | 0.8400 | 0.8020 | 0.6080 |
|             | MixMHCpred-2.0.2   | 0.8630 | 0.7790 | 0.9070 | 0.8430 | 0.6930 |
| HLA-B*57:03 | HLAB               | 0.9595 | 0.9649 | 0.9138 | 0.9391 | 0.8795 |
|             | Anthem             | 0.9580 | 0.8950 | 0.9240 | 0.9090 | 0.8200 |
|             | NetMHCpan-4.1      | 0.9270 | 0.8720 | 0.8680 | 0.8700 | 0.7410 |
|             | ACME               | 0.9050 | 0.8000 | 0.8900 | 0.8450 | 0.6920 |
|             | NetMHCstabpan-1.00 | 0.8710 | 0.8100 | 0.7890 | 0.8000 | 0.6020 |
|             | NetMHCcons-1.1     | 0.8670 | 0.8300 | 0.7700 | 0.8000 | 0.6020 |
|             | MHCNetSeq          | 0.8580 | 0.7770 | 0.8070 | 0.7920 | 0.5850 |
| HLA-B*58:01 | HLAB               | 0.9938 | 0.9481 | 1.0000 | 0.9742 | 0.9496 |
|             | Anthem             | 0.9880 | 0.9450 | 0.9360 | 0.9410 | 0.8820 |
|             | ACME               | 0.9730 | 0.9430 | 0.9490 | 0.9460 | 0.8920 |
|             | NetMHCpan-4.1      | 0.9710 | 0.9140 | 0.9290 | 0.9210 | 0.8440 |
|             | MHCNetSeq          | 0.9690 | 0.8910 | 0.9490 | 0.9200 | 0.8420 |
|             | MixMHCpred-2.0.2   | 0.9640 | 0.8930 | 0.9090 | 0.9020 | 0.8040 |
|             | NetMHCcons-1.1     | 0.9600 | 0.9040 | 0.9230 | 0.9140 | 0.8270 |
|             | NetMHCstabpan-1.00 | 0.9590 | 0.9030 | 0.9250 | 0.9140 | 0.8280 |
| HLA-C*01:02 | NetMHCpan-4.1      | 0.9690 | 0.9370 | 0.9350 | 0.9360 | 0.8730 |
|             | HLAB               | 0.9640 | 0.9630 | 0.9091 | 0.9358 | 0.8729 |
|             | NetMHCcons-1.1     | 0.9630 | 0.9030 | 0.9460 | 0.9250 | 0.8510 |
|             | Anthem             | 0.9560 | 0.8550 | 0.9240 | 0.8900 | 0.7830 |
|             | NetMHCstabpan-1.00 | 0.9540 | 0.9170 | 0.9020 | 0.9090 | 0.8190 |
|             | MixMHCpred-2.0.2   | 0.9410 | 0.9000 | 0.8390 | 0.8690 | 0.7410 |
|             | MHCNetSeq          | 0.7610 | 0.8330 | 0.4850 | 0.6590 | 0.3390 |
| HLA-C*02:02 | Anthem             | 0.9890 | 0.9330 | 0.9500 | 0.9420 | 0.8860 |
|             | MixMHCpred-2.0.2   | 0.9800 | 0.9580 | 0.9830 | 0.9710 | 0.9420 |
|             | HLAB               | 0.9583 | 1.0000 | 0.9200 | 0.9592 | 0.9215 |
|             | NetMHCcons-1.1     | 0.9480 | 0.8710 | 0.9170 | 0.8940 | 0.7900 |
|             | NetMHCstabpan-1.00 | 0.9460 | 0.9210 | 0.8630 | 0.8920 | 0.7860 |
|             | NetMHCpan-4.1      | 0.9430 | 0.8960 | 0.8750 | 0.8860 | 0.7720 |
|             | MHCNetSeq          | 0.8570 | 0.7620 | 0.7460 | 0.7540 | 0.5100 |
| HLA-C*03:03 | NetMHCstabpan-1.00 | 0.9580 | 0.9240 | 0.9440 | 0.9340 | 0.8680 |
|             | NetMHCpan-4.1      | 0.9570 | 0.9240 | 0.9380 | 0.9310 | 0.8620 |
|             | MixMHCpred-2.0.2   | 0.9560 | 0.9090 | 0.9680 | 0.9380 | 0.8780 |

|             |                    |        |        |        |        |        |
|-------------|--------------------|--------|--------|--------|--------|--------|
|             | NetMHCcons-1.1     | 0.9530 | 0.9180 | 0.9350 | 0.9260 | 0.8540 |
|             | HLAB               | 0.9462 | 0.9412 | 0.8857 | 0.9130 | 0.8276 |
|             | Anthem             | 0.9450 | 0.8650 | 0.9540 | 0.9090 | 0.8230 |
|             | MHCNetSeq          | 0.9440 | 0.9380 | 0.8910 | 0.9150 | 0.8310 |
| HLA-C*03:04 | MixMHCpred-2.0.2   | 0.9950 | 0.9600 | 0.9790 | 0.9690 | 0.9390 |
|             | Anthem             | 0.9930 | 0.9510 | 0.9620 | 0.9570 | 0.9140 |
|             | NetMHCpan-4.1      | 0.9920 | 0.9630 | 0.9650 | 0.9640 | 0.9280 |
|             | HLAB               | 0.9903 | 0.9649 | 0.9310 | 0.9478 | 0.8962 |
|             | NetMHCcons-1.1     | 0.9860 | 0.9650 | 0.9510 | 0.9580 | 0.9160 |
|             | NetMHCstabpan-1.00 | 0.9860 | 0.9630 | 0.9490 | 0.9560 | 0.9130 |
|             | MHCNetSeq          | 0.9710 | 0.9260 | 0.9000 | 0.9130 | 0.8270 |
| HLA-C*04:01 | Anthem             | 0.9610 | 0.8660 | 0.9550 | 0.9100 | 0.8240 |
|             | MixMHCpred-2.0.2   | 0.9540 | 0.8970 | 0.9160 | 0.9060 | 0.8130 |
|             | NetMHCpan-4.1      | 0.9530 | 0.8780 | 0.9270 | 0.9020 | 0.8050 |
|             | HLAB               | 0.9434 | 0.8797 | 0.9560 | 0.9180 | 0.8383 |
|             | NetMHCstabpan-1.00 | 0.9390 | 0.8490 | 0.9100 | 0.8790 | 0.7600 |
|             | NetMHCcons-1.1     | 0.9230 | 0.8410 | 0.8640 | 0.8530 | 0.7060 |
|             | MHCNetSeq          | 0.8500 | 0.7400 | 0.8230 | 0.7820 | 0.5660 |
| HLA-C*05:01 | Anthem             | 0.9970 | 0.9760 | 0.9830 | 0.9800 | 0.9590 |
|             | MixMHCpred-2.0.2   | 0.9970 | 0.9730 | 0.9870 | 0.9800 | 0.9600 |
|             | NetMHCpan-4.1      | 0.9970 | 0.9890 | 0.9800 | 0.9840 | 0.9690 |
|             | NetMHCstabpan-1.00 | 0.9960 | 0.9830 | 0.9740 | 0.9790 | 0.9580 |
|             | NetMHCcons-1.1     | 0.9950 | 0.9850 | 0.9690 | 0.9770 | 0.9540 |
|             | HLAB               | 0.9902 | 0.9861 | 0.9517 | 0.9689 | 0.9383 |
|             | MHCNetSeq          | 0.9270 | 0.9930 | 0.4510 | 0.7220 | 0.5280 |
| HLA-C*06:02 | HLAB               | 0.9810 | 0.9714 | 0.9444 | 0.9577 | 0.9159 |
|             | MixMHCpred-2.0.2   | 0.9810 | 0.9430 | 0.9830 | 0.9630 | 0.9270 |
|             | NetMHCcons-1.1     | 0.9700 | 0.9430 | 0.9110 | 0.9270 | 0.8550 |
|             | NetMHCpan-4.1      | 0.9680 | 0.9030 | 0.9170 | 0.9100 | 0.8210 |
|             | Anthem             | 0.9580 | 0.8290 | 0.9500 | 0.8890 | 0.7900 |
|             | NetMHCstabpan-1.00 | 0.9570 | 0.9140 | 0.8710 | 0.8930 | 0.7880 |
|             | MHCNetSeq          | 0.7340 | 0.7290 | 0.7110 | 0.7200 | 0.4420 |
| HLA-C*07:01 | NetMHCpan-4.1      | 0.9880 | 0.9580 | 0.9730 | 0.9660 | 0.9320 |
|             | NetMHCstabpan-1.00 | 0.9870 | 0.9800 | 0.9490 | 0.9650 | 0.9300 |
|             | NetMHCcons-1.1     | 0.9800 | 0.9620 | 0.9200 | 0.9410 | 0.8840 |
|             | MixMHCpred-2.0.2   | 0.9690 | 0.9420 | 0.9020 | 0.9220 | 0.8460 |
|             | Anthem             | 0.9650 | 0.9240 | 0.9130 | 0.9190 | 0.8380 |
|             | HLAB               | 0.9367 | 0.9778 | 0.8696 | 0.9231 | 0.8515 |
|             | MHCNetSeq          | 0.8450 | 0.7850 | 0.7800 | 0.7820 | 0.5670 |
| HLA-C*07:02 | HLAB               | 0.9997 | 0.9811 | 0.9815 | 0.9813 | 0.9626 |
|             | Anthem             | 0.9960 | 0.9770 | 0.9690 | 0.9730 | 0.9470 |
|             | NetMHCpan-4.1      | 0.9960 | 0.9640 | 0.9770 | 0.9710 | 0.9420 |
|             | MixMHCpred-2.0.2   | 0.9950 | 0.9940 | 0.9730 | 0.9840 | 0.9680 |
|             | NetMHCcons-1.1     | 0.9940 | 0.9750 | 0.9660 | 0.9710 | 0.9420 |

|             |                         |        |        |        |        |
|-------------|-------------------------|--------|--------|--------|--------|
|             | NetMHCstabpan-1.00.9900 | 0.9600 | 0.9560 | 0.9580 | 0.9180 |
|             | MHCNetSeq               | 0.9480 | 0.8760 | 0.8550 | 0.7310 |
| HLA-C*07:04 | HLAB                    | 1.0000 | 1.0000 | 1.0000 | 1.0000 |
|             | NetMHCpan-4.1           | 0.9930 | 0.9950 | 0.9890 | 0.9850 |
|             | NetMHCstabpan-1.00.9880 | 1.0000 | 0.9740 | 0.9870 | 0.9750 |
|             | Anthem                  | 0.9790 | 0.8530 | 0.9480 | 0.9000 |
|             | NetMHCcons-1.1          | 0.9790 | 0.9890 | 0.9580 | 0.9740 |
|             | MHCNetSeq               | 0.7370 | 0.8100 | 0.5840 | 0.6970 |
| HLA-C*08:02 | MixMHCpred-2.0.2        | 0.9990 | 0.9920 | 0.9890 | 0.9910 |
|             | Anthem                  | 0.9980 | 0.9850 | 0.9850 | 0.9850 |
|             | NetMHCpan-4.1           | 0.9980 | 1.0000 | 0.9880 | 0.9940 |
|             | HLAB                    | 0.9970 | 0.9691 | 1.0000 | 0.9846 |
|             | NetMHCcons-1.1          | 0.9950 | 0.9790 | 0.9750 | 0.9770 |
|             | NetMHCstabpan-1.00.9950 | 0.9760 | 0.9710 | 0.9740 | 0.9480 |
|             | MHCNetSeq               | 0.8990 | 0.9440 | 0.6610 | 0.8030 |
| HLA-C*12:03 | MixMHCpred-2.0.2        | 0.9920 | 0.9670 | 0.9600 | 0.9630 |
|             | NetMHCpan-4.1           | 0.9810 | 0.9800 | 0.9430 | 0.9620 |
|             | NetMHCcons-1.1          | 0.9760 | 0.9670 | 0.9270 | 0.9470 |
|             | NetMHCstabpan-1.00.9700 | 0.9500 | 0.9200 | 0.9350 | 0.8710 |
|             | Anthem                  | 0.9690 | 0.9260 | 0.9550 | 0.9410 |
|             | HLAB                    | 0.9634 | 1.0000 | 0.8065 | 0.9016 |
|             | MHCNetSeq               | 0.7670 | 0.7260 | 0.7070 | 0.7170 |
| HLA-C*14:02 | MixMHCpred-2.0.2        | 1.0000 | 0.9980 | 0.9950 | 0.9960 |
|             | Anthem                  | 0.9990 | 0.9880 | 0.9960 | 0.9920 |
|             | NetMHCpan-4.1           | 0.9990 | 0.9970 | 0.9930 | 0.9950 |
|             | HLAB                    | 0.9977 | 0.9897 | 0.9898 | 0.9897 |
|             | NetMHCcons-1.1          | 0.9940 | 0.9880 | 0.9650 | 0.9760 |
|             | NetMHCstabpan-1.00.9930 | 0.9950 | 0.9560 | 0.9750 | 0.9520 |
|             | MHCNetSeq               | 0.6030 | 0.6910 | 0.5030 | 0.5970 |
| HLA-C*15:02 | NetMHCpan-4.1           | 0.9920 | 1.0000 | 0.9640 | 0.9820 |
|             | MixMHCpred-2.0.2        | 0.9900 | 0.9490 | 0.9510 | 0.9500 |
|             | Anthem                  | 0.9890 | 0.9230 | 0.9570 | 0.9400 |
|             | HLAB                    | 0.9878 | 1.0000 | 0.9250 | 0.9620 |
|             | NetMHCcons-1.1          | 0.9840 | 0.9820 | 0.9560 | 0.9690 |
|             | NetMHCstabpan-1.00.9830 | 0.9900 | 0.9410 | 0.9650 | 0.9320 |
|             | MHCNetSeq               | 0.8730 | 0.8160 | 0.8410 | 0.8280 |
| HLA-C*16:01 | NetMHCpan-4.1           | 0.9880 | 0.9690 | 0.9410 | 0.9550 |
|             | Anthem                  | 0.9870 | 0.9420 | 0.9580 | 0.9500 |
|             | MixMHCpred-2.0.2        | 0.9840 | 0.9360 | 0.9460 | 0.9420 |
|             | HLAB                    | 0.9796 | 0.9613 | 0.9423 | 0.9518 |
|             | NetMHCstabpan-1.00.9490 | 0.9360 | 0.8750 | 0.9060 | 0.8130 |
|             | NetMHCcons-1.1          | 0.9470 | 0.9290 | 0.8730 | 0.9010 |
|             | MHCNetSeq               | 0.8440 | 0.8840 | 0.4770 | 0.6800 |
| HLA-C*17:01 | MixMHCpred-2.0.2        | 0.9880 | 0.9640 | 0.9640 | 0.9290 |

|   |             |                    |        |        |        |        |        |
|---|-------------|--------------------|--------|--------|--------|--------|--------|
|   |             | NetMHCpan-4.1      | 0.9810 | 0.9600 | 0.9400 | 0.9500 | 0.9010 |
|   |             | Anthem             | 0.9720 | 0.8080 | 0.9460 | 0.8770 | 0.7620 |
|   |             | NetMHCstabpan-1.00 | 0.9710 | 0.9320 | 0.9320 | 0.9320 | 0.8650 |
|   |             | NetMHCcons-1.1     | 0.9480 | 0.9120 | 0.9240 | 0.9180 | 0.8380 |
|   |             | HLAB               | 0.9477 | 0.9600 | 0.8077 | 0.8824 | 0.7749 |
|   |             | MHCNetSeq          | 0.7780 | 0.7240 | 0.7600 | 0.7420 | 0.4910 |
| 9 | HLA-A*01:01 | NetMHCpan-4.1      | 0.9850 | 0.9520 | 0.9540 | 0.9530 | 0.9060 |
|   |             | NetMHCcons-1.1     | 0.9830 | 0.9410 | 0.9460 | 0.9440 | 0.8870 |
|   |             | NetMHCstabpan-1.00 | 0.9830 | 0.9350 | 0.9490 | 0.9420 | 0.8840 |
|   |             | Anthem             | 0.9820 | 0.9380 | 0.9590 | 0.9490 | 0.8970 |
|   |             | ACME               | 0.9790 | 0.9340 | 0.9420 | 0.9380 | 0.8770 |
|   |             | HLAB               | 0.9780 | 0.9416 | 0.9522 | 0.9469 | 0.8938 |
|   |             | MixMHCpred-2.0.2   | 0.9760 | 0.9370 | 0.9430 | 0.9400 | 0.8800 |
|   |             | DeepSeqPan         | 0.9680 | 0.9060 | 0.9290 | 0.9180 | 0.8360 |
|   |             | MHCNetSeq          | 0.9580 | 0.8980 | 0.9040 | 0.9010 | 0.8020 |
|   | HLA-A*02:01 | HLAB               | 0.9599 | 0.9005 | 0.9183 | 0.9094 | 0.8190 |
|   |             | Anthem             | 0.9560 | 0.8770 | 0.9200 | 0.8990 | 0.7990 |
|   |             | NetMHCpan-4.1      | 0.9560 | 0.8900 | 0.9060 | 0.8980 | 0.7960 |
|   |             | NetMHCstabpan-1.00 | 0.9560 | 0.8920 | 0.9030 | 0.8970 | 0.7950 |
|   |             | NetMHCcons-1.1     | 0.9550 | 0.8870 | 0.9070 | 0.8970 | 0.7940 |
|   |             | ACME               | 0.9510 | 0.8910 | 0.9110 | 0.9010 | 0.8030 |
|   |             | DeepSeqPan         | 0.9440 | 0.8750 | 0.8940 | 0.8850 | 0.7700 |
|   |             | MixMHCpred-2.0.2   | 0.9430 | 0.8700 | 0.8900 | 0.8800 | 0.7600 |
|   |             | MHCNetSeq          | 0.9380 | 0.8750 | 0.9020 | 0.8880 | 0.7770 |
|   | HLA-A*02:02 | HLAB               | 0.9645 | 0.9238 | 0.9175 | 0.9207 | 0.8413 |
|   |             | MixMHCpred-2.0.2   | 0.9630 | 0.9310 | 0.8950 | 0.9130 | 0.8270 |
|   |             | ACME               | 0.9610 | 0.9430 | 0.8960 | 0.9190 | 0.8390 |
|   |             | Anthem             | 0.9520 | 0.9510 | 0.8640 | 0.9070 | 0.8180 |
|   |             | NetMHCstabpan-1.00 | 0.9510 | 0.9100 | 0.8770 | 0.8940 | 0.7890 |
|   |             | NetMHCpan-4.1      | 0.9500 | 0.9200 | 0.8790 | 0.9000 | 0.8010 |
|   |             | NetMHCcons-1.1     | 0.9500 | 0.8940 | 0.8870 | 0.8910 | 0.7820 |
|   |             | DeepSeqPan         | 0.9410 | 0.8970 | 0.8710 | 0.8840 | 0.7690 |
|   |             | MHCNetSeq          | 0.9050 | 0.8530 | 0.8620 | 0.8580 | 0.7160 |
|   | HLA-A*02:03 | ACME               | 0.9770 | 0.9410 | 0.9180 | 0.9300 | 0.8590 |
|   |             | NetMHCstabpan-1.00 | 0.9730 | 0.9400 | 0.9070 | 0.9240 | 0.8470 |
|   |             | NetMHCpan-4.1      | 0.9720 | 0.9360 | 0.9040 | 0.9200 | 0.8420 |
|   |             | NetMHCcons-1.1     | 0.9720 | 0.9360 | 0.9090 | 0.9220 | 0.8450 |
|   |             | HLAB               | 0.9716 | 0.9599 | 0.9123 | 0.9361 | 0.8732 |
|   |             | Anthem             | 0.9700 | 0.9460 | 0.8800 | 0.9130 | 0.8280 |
|   |             | DeepSeqPan         | 0.9650 | 0.9190 | 0.8990 | 0.9090 | 0.8180 |
|   |             | MHCNetSeq          | 0.9490 | 0.8950 | 0.8850 | 0.8900 | 0.7800 |
|   |             | MixMHCpred-2.0.2   | 0.9480 | 0.8880 | 0.8640 | 0.8760 | 0.7520 |
|   | HLA-A*02:04 | MixMHCpred-2.0.2   | 0.9860 | 0.9370 | 0.9490 | 0.9430 | 0.8860 |
|   |             | NetMHCpan-4.1      | 0.9860 | 0.9550 | 0.9550 | 0.9550 | 0.9100 |

|             |                    |        |        |        |        |        |
|-------------|--------------------|--------|--------|--------|--------|--------|
|             | MHCNetSeq          | 0.9860 | 0.9500 | 0.9550 | 0.9520 | 0.9040 |
|             | NetMHCcons-1.1     | 0.9830 | 0.9580 | 0.9520 | 0.9550 | 0.9100 |
|             | NetMHCstabpan-1.00 | 0.9830 | 0.9590 | 0.9460 | 0.9530 | 0.9060 |
|             | ACME               | 0.9820 | 0.9460 | 0.9480 | 0.9470 | 0.8940 |
|             | Anthem             | 0.9800 | 0.9170 | 0.9620 | 0.9390 | 0.8800 |
|             | HLAB               | 0.9760 | 0.9457 | 0.9458 | 0.9458 | 0.8915 |
|             | DeepSeqPan         | 0.9750 | 0.9400 | 0.9350 | 0.9380 | 0.8750 |
| HLA-B*07:02 | NetMHCpan-4.1      | 0.9860 | 0.9560 | 0.9560 | 0.9560 | 0.9120 |
|             | NetMHCcons-1.1     | 0.9860 | 0.9560 | 0.9560 | 0.9560 | 0.9110 |
|             | NetMHCstabpan-1.00 | 0.9860 | 0.9550 | 0.9590 | 0.9570 | 0.9140 |
|             | HLAB               | 0.9847 | 0.9586 | 0.9396 | 0.9491 | 0.8983 |
|             | Anthem             | 0.9830 | 0.9420 | 0.9540 | 0.9480 | 0.8960 |
|             | MHCNetSeq          | 0.9790 | 0.9390 | 0.9420 | 0.9410 | 0.8810 |
|             | DeepSeqPan         | 0.9790 | 0.9380 | 0.9350 | 0.9360 | 0.8730 |
|             | MixMHCpred-2.0.2   | 0.9780 | 0.9370 | 0.9390 | 0.9380 | 0.8760 |
| HLA-B*08:01 | NetMHCpan-4.1      | 0.9870 | 0.9560 | 0.9560 | 0.9550 | 0.9110 |
|             | NetMHCcons-1.1     | 0.9850 | 0.9530 | 0.9520 | 0.9530 | 0.9050 |
|             | NetMHCstabpan-1.00 | 0.9850 | 0.9530 | 0.9500 | 0.9520 | 0.9040 |
|             | HLAB               | 0.9848 | 0.9394 | 0.9603 | 0.9498 | 0.8999 |
|             | ACME               | 0.9840 | 0.9490 | 0.9580 | 0.9540 | 0.9070 |
|             | Anthem             | 0.9800 | 0.9300 | 0.9420 | 0.9360 | 0.8710 |
|             | MixMHCpred-2.0.2   | 0.9740 | 0.9230 | 0.9270 | 0.9250 | 0.8500 |
|             | MHCNetSeq          | 0.9740 | 0.9210 | 0.9440 | 0.9330 | 0.8660 |
|             | DeepSeqPan         | 0.9700 | 0.9240 | 0.9150 | 0.9200 | 0.8400 |
| HLA-B*13:02 | Anthem             | 0.9960 | 0.9820 | 0.9780 | 0.9800 | 0.9600 |
|             | HLAB               | 0.9957 | 0.9751 | 0.9818 | 0.9785 | 0.9569 |
|             | MixMHCpred-2.0.2   | 0.9950 | 0.9770 | 0.9760 | 0.9760 | 0.9530 |
|             | NetMHCpan-4.1      | 0.9910 | 0.9640 | 0.9550 | 0.9600 | 0.9200 |
|             | NetMHCstabpan-1.00 | 0.9680 | 0.9310 | 0.8940 | 0.9120 | 0.8260 |
|             | NetMHCcons-1.1     | 0.9670 | 0.9320 | 0.8920 | 0.9120 | 0.8250 |
|             | MHCNetSeq          | 0.9300 | 0.8830 | 0.8510 | 0.8670 | 0.7350 |
|             | ACME               | 0.8590 | 0.7740 | 0.7750 | 0.7750 | 0.5490 |
| HLA-B*14:01 | HLAB               | 1.0000 | 1.0000 | 1.0000 | 1.0000 | 1.0000 |
|             | MixMHCpred-2.0.2   | 1.0000 | 1.0000 | 1.0000 | 1.0000 | 1.0000 |
|             | Anthem             | 0.9970 | 1.0000 | 0.9840 | 0.9920 | 0.9850 |
|             | NetMHCstabpan-1.00 | 0.9920 | 0.9580 | 0.9630 | 0.9610 | 0.9220 |
|             | NetMHCcons-1.1     | 0.9910 | 0.9630 | 0.9630 | 0.9630 | 0.9270 |
|             | NetMHCpan-4.1      | 0.9900 | 0.9420 | 0.9790 | 0.9610 | 0.9220 |
|             | ACME               | 0.9890 | 0.9530 | 0.9680 | 0.9610 | 0.9230 |
|             | MHCNetSeq          | 0.9820 | 0.9370 | 0.9680 | 0.9530 | 0.9070 |
|             | DeepSeqPan         | 0.9810 | 0.9470 | 0.9630 | 0.9550 | 0.9120 |
| HLA-B*14:02 | Anthem             | 0.9870 | 0.9650 | 0.9350 | 0.9500 | 0.9000 |
|             | HLAB               | 0.9858 | 0.9832 | 0.9314 | 0.9573 | 0.9158 |
|             | NetMHCpan-4.1      | 0.9790 | 0.9760 | 0.9280 | 0.9520 | 0.9060 |

|             |                    |        |        |        |        |        |
|-------------|--------------------|--------|--------|--------|--------|--------|
|             | NetMHCstabpan-1.00 | 0.9780 | 0.9600 | 0.9340 | 0.9470 | 0.8940 |
|             | NetMHCcons-1.1     | 0.9700 | 0.9630 | 0.9080 | 0.9350 | 0.8730 |
|             | MixMHCpred-2.0.2   | 0.9520 | 0.9020 | 0.8600 | 0.8810 | 0.7630 |
|             | ACME               | 0.9360 | 0.8680 | 0.8590 | 0.8640 | 0.7280 |
|             | DeepSeqPan         | 0.9090 | 0.8570 | 0.8150 | 0.8360 | 0.6720 |
|             | MHCNetSeq          | 0.8870 | 0.7870 | 0.7980 | 0.7930 | 0.5860 |
| HLA-B*15:01 | Anthem             | 0.9850 | 0.9500 | 0.9400 | 0.9450 | 0.8900 |
|             | NetMHCstabpan-1.00 | 0.9830 | 0.9470 | 0.9500 | 0.9490 | 0.8970 |
|             | NetMHCpan-4.1      | 0.9820 | 0.9510 | 0.9420 | 0.9460 | 0.8930 |
|             | MixMHCpred-2.0.2   | 0.9810 | 0.9420 | 0.9340 | 0.9380 | 0.8760 |
|             | NetMHCcons-1.1     | 0.9810 | 0.9430 | 0.9460 | 0.9440 | 0.8890 |
|             | HLAB               | 0.9805 | 0.9971 | 0.4579 | 0.7274 | 0.5402 |
|             | ACME               | 0.9800 | 0.9480 | 0.9430 | 0.9450 | 0.8910 |
|             | MHCNetSeq          | 0.9730 | 0.9380 | 0.9360 | 0.9370 | 0.8740 |
|             | DeepSeqPan         | 0.9660 | 0.9220 | 0.9050 | 0.9140 | 0.8270 |
| HLA-B*15:02 | Anthem             | 0.9790 | 0.9540 | 0.9560 | 0.9550 | 0.9110 |
|             | HLAB               | 0.9766 | 0.9811 | 0.9444 | 0.9626 | 0.9259 |
|             | MixMHCpred-2.0.2   | 0.9750 | 0.9410 | 0.9550 | 0.9480 | 0.8970 |
|             | NetMHCcons-1.1     | 0.9700 | 0.9620 | 0.9730 | 0.9680 | 0.9360 |
|             | MHCNetSeq          | 0.9700 | 0.9510 | 0.9020 | 0.9260 | 0.8550 |
|             | NetMHCpan-4.1      | 0.9690 | 0.9580 | 0.9700 | 0.9640 | 0.9290 |
|             | NetMHCstabpan-1.00 | 0.9690 | 0.9600 | 0.9600 | 0.9600 | 0.9210 |
|             | ACME               | 0.9690 | 0.9560 | 0.9530 | 0.9550 | 0.9100 |
|             | DeepSeqPan         | 0.9260 | 0.8870 | 0.8740 | 0.8800 | 0.7610 |
| HLA-B*15:03 | NetMHCcons-1.1     | 0.9790 | 0.9340 | 0.9340 | 0.9340 | 0.8690 |
|             | ACME               | 0.9790 | 0.9650 | 0.9350 | 0.9500 | 0.9010 |
|             | NetMHCpan-4.1      | 0.9740 | 0.9180 | 0.9340 | 0.9260 | 0.8530 |
|             | NetMHCstabpan-1.00 | 0.9740 | 0.9190 | 0.9290 | 0.9240 | 0.8490 |
|             | Anthem             | 0.9730 | 0.9020 | 0.9150 | 0.9090 | 0.8190 |
|             | HLAB               | 0.9691 | 0.8049 | 0.9518 | 0.8788 | 0.7655 |
|             | DeepSeqPan         | 0.9690 | 0.9410 | 0.9430 | 0.9420 | 0.8840 |
|             | MixMHCpred-2.0.2   | 0.9190 | 0.8960 | 0.8280 | 0.8620 | 0.7270 |
|             | MHCNetSeq          | 0.7970 | 0.7000 | 0.7770 | 0.7380 | 0.4830 |
| HLA-B*15:09 | ACME               | 0.9960 | 0.9900 | 0.9810 | 0.9860 | 0.9720 |
|             | MixMHCpred-2.0.2   | 0.9940 | 1.0000 | 0.9760 | 0.9880 | 0.9770 |
|             | NetMHCpan-4.1      | 0.9940 | 1.0000 | 0.9760 | 0.9880 | 0.9760 |
|             | NetMHCcons-1.1     | 0.9920 | 1.0000 | 0.9710 | 0.9860 | 0.9720 |
|             | HLAB               | 0.9913 | 0.8571 | 1.0000 | 0.9302 | 0.8685 |
|             | NetMHCstabpan-1.00 | 0.9900 | 0.9950 | 0.9710 | 0.9830 | 0.9670 |
|             | DeepSeqPan         | 0.9780 | 0.9620 | 0.9240 | 0.9430 | 0.8870 |
|             | Anthem             | 0.9740 | 0.7430 | 0.9650 | 0.8540 | 0.7280 |
|             | MHCNetSeq          | 0.9270 | 0.8670 | 0.8620 | 0.8640 | 0.7300 |
| HLA-B*15:11 | Anthem             | 0.9890 | 0.9660 | 0.9780 | 0.9720 | 0.9430 |
|             | MHCNetSeq          | 0.9800 | 0.9420 | 0.9260 | 0.9340 | 0.8680 |

|             |                    |        |        |        |        |        |
|-------------|--------------------|--------|--------|--------|--------|--------|
|             | NetMHCpan-4.1      | 0.9700 | 0.9330 | 0.9220 | 0.9270 | 0.8550 |
|             | ACME               | 0.9690 | 0.9390 | 0.9270 | 0.9330 | 0.8650 |
|             | HLAB               | 0.9609 | 0.8973 | 0.9409 | 0.9191 | 0.8390 |
|             | NetMHCstabpan-1.00 | 0.9650 | 0.9230 | 0.9220 | 0.9230 | 0.8460 |
|             | NetMHCcons-1.1     | 0.9620 | 0.9180 | 0.9100 | 0.9140 | 0.8280 |
| HLA-B*15:17 | MixMHCpred-2.0.2   | 0.9690 | 0.9400 | 0.9020 | 0.9210 | 0.8440 |
|             | Anthem             | 0.9570 | 0.9130 | 0.8770 | 0.8950 | 0.7920 |
|             | ACME               | 0.9530 | 0.9070 | 0.8850 | 0.8960 | 0.7930 |
|             | NetMHCpan-4.1      | 0.9480 | 0.9130 | 0.8800 | 0.8960 | 0.7940 |
|             | NetMHCcons-1.1     | 0.9440 | 0.8980 | 0.8810 | 0.8890 | 0.7800 |
|             | NetMHCstabpan-1.00 | 0.9440 | 0.9030 | 0.8830 | 0.8930 | 0.7870 |
|             | DeepSeqPan         | 0.9080 | 0.8420 | 0.8470 | 0.8450 | 0.6910 |
|             | HLAB               | 0.9037 | 0.9192 | 0.8200 | 0.8693 | 0.7426 |
|             | MHCNetSeq          | 0.8270 | 0.7380 | 0.8330 | 0.7860 | 0.5750 |
| HLA-B*15:18 | HLAB               | 0.9955 | 0.9954 | 0.9862 | 0.9908 | 0.9816 |
|             | Anthem             | 0.9950 | 0.9890 | 0.9870 | 0.9880 | 0.9760 |
|             | MixMHCpred-2.0.2   | 0.9950 | 0.9940 | 0.9930 | 0.9940 | 0.9880 |
|             | NetMHCpan-4.1      | 0.9910 | 0.9810 | 0.9600 | 0.9710 | 0.9420 |
|             | NetMHCcons-1.1     | 0.9860 | 0.9720 | 0.9610 | 0.9670 | 0.9330 |
|             | NetMHCstabpan-1.00 | 0.9860 | 0.9710 | 0.9640 | 0.9670 | 0.9350 |
|             | ACME               | 0.9810 | 0.9690 | 0.9520 | 0.9600 | 0.9210 |
|             | MHCNetSeq          | 0.7890 | 0.7020 | 0.7230 | 0.7120 | 0.4250 |
| HLA-B*15:42 | MixMHCpred-2.0.2   | 0.9830 | 0.9310 | 0.9480 | 0.9400 | 0.8790 |
|             | Anthem             | 0.9720 | 0.9210 | 0.9030 | 0.9120 | 0.8270 |
|             | HLAB               | 0.9475 | 0.9155 | 0.9167 | 0.9161 | 0.8322 |
|             | NetMHCstabpan-1.00 | 0.9410 | 0.8840 | 0.8870 | 0.8860 | 0.7720 |
|             | NetMHCpan-4.1      | 0.9300 | 0.8760 | 0.8820 | 0.8790 | 0.7580 |
|             | NetMHCcons-1.1     | 0.8790 | 0.8560 | 0.7730 | 0.8150 | 0.6330 |
|             | DeepSeqPan         | 0.8650 | 0.7970 | 0.7920 | 0.7950 | 0.5900 |
|             | ACME               | 0.8050 | 0.8340 | 0.7110 | 0.7730 | 0.5500 |
| HLA-B*18:01 | ACME               | 0.9900 | 0.9530 | 0.9650 | 0.9590 | 0.9180 |
|             | NetMHCpan-4.1      | 0.9880 | 0.9530 | 0.9540 | 0.9530 | 0.9060 |
|             | NetMHCcons-1.1     | 0.9880 | 0.9560 | 0.9560 | 0.9560 | 0.9110 |
|             | NetMHCstabpan-1.00 | 0.9870 | 0.9510 | 0.9520 | 0.9520 | 0.9040 |
|             | Anthem             | 0.9850 | 0.9300 | 0.9550 | 0.9430 | 0.8860 |
|             | MixMHCpred-2.0.2   | 0.9780 | 0.9240 | 0.9280 | 0.9260 | 0.8520 |
|             | HLAB               | 0.9772 | 0.9591 | 0.9520 | 0.9556 | 0.9112 |
|             | DeepSeqPan         | 0.9720 | 0.9200 | 0.9260 | 0.9230 | 0.8460 |
|             | MHCNetSeq          | 0.9710 | 0.9180 | 0.9320 | 0.9250 | 0.8510 |
| HLA-B*18:03 | Anthem             | 0.9990 | 0.9880 | 0.9820 | 0.9850 | 0.9700 |
|             | MixMHCpred-2.0.2   | 0.9990 | 1.0000 | 0.9910 | 0.9950 | 0.9910 |
|             | NetMHCpan-4.1      | 0.9900 | 0.9600 | 0.9810 | 0.9700 | 0.9410 |
|             | ACME               | 0.9870 | 0.9470 | 0.9470 | 0.9470 | 0.8950 |
|             | NetMHCcons-1.1     | 0.9840 | 0.9690 | 0.9500 | 0.9600 | 0.9200 |



|             |                         |        |        |        |        |
|-------------|-------------------------|--------|--------|--------|--------|
|             | NetMHCstabpan-1.00.9830 | 0.9630 | 0.9380 | 0.9500 | 0.9010 |
|             | MHCNetSeq               | 0.9780 | 0.9380 | 0.9560 | 0.8940 |
|             | HLAB                    | 0.9337 | 1.0000 | 0.8485 | 0.9231 |
| HLA-B*27:01 | MixMHCpred-2.0.2        | 0.9970 | 0.9910 | 0.9830 | 0.9880 |
|             | NetMHCpan-4.1           | 0.9970 | 0.9930 | 0.9810 | 0.9870 |
|             | Anthem                  | 0.9960 | 0.9930 | 0.9760 | 0.9840 |
|             | ACME                    | 0.9950 | 0.9860 | 0.9710 | 0.9790 |
|             | MHCNetSeq               | 0.9950 | 0.9840 | 0.9690 | 0.9770 |
|             | NetMHCcons-1.1          | 0.9890 | 0.9660 | 0.9430 | 0.9550 |
|             | NetMHCstabpan-1.00.9890 | 0.9890 | 0.9610 | 0.9440 | 0.9530 |
|             | HLAB                    | 0.9886 | 0.9894 | 0.9683 | 0.9789 |
|             | DeepSeqPan              | 0.8780 | 0.8260 | 0.7900 | 0.8080 |
| HLA-B*27:02 | MixMHCpred-2.0.2        | 0.9960 | 0.9820 | 0.9840 | 0.9830 |
|             | HLAB                    | 0.9952 | 0.9922 | 0.9884 | 0.9903 |
|             | Anthem                  | 0.9940 | 0.9830 | 0.9840 | 0.9830 |
|             | NetMHCpan-4.1           | 0.9930 | 0.9810 | 0.9780 | 0.9800 |
|             | NetMHCstabpan-1.00.9910 | 0.9910 | 0.9850 | 0.9710 | 0.9780 |
|             | MHCNetSeq               | 0.9910 | 0.9700 | 0.9710 | 0.9710 |
|             | ACME                    | 0.9890 | 0.9780 | 0.9650 | 0.9720 |
|             | NetMHCcons-1.1          | 0.9880 | 0.9680 | 0.9590 | 0.9630 |
|             | DeepSeqPan              | 0.9690 | 0.9390 | 0.9100 | 0.9240 |
| HLA-B*27:03 | MHCNetSeq               | 0.9960 | 0.9810 | 0.9740 | 0.9780 |
|             | HLAB                    | 0.9882 | 0.9804 | 0.9806 | 0.9805 |
|             | MixMHCpred-2.0.2        | 0.9880 | 0.9370 | 0.9740 | 0.9560 |
|             | NetMHCpan-4.1           | 0.9860 | 0.9520 | 0.9600 | 0.9560 |
|             | Anthem                  | 0.9850 | 0.9240 | 0.9790 | 0.9520 |
|             | ACME                    | 0.9720 | 0.9210 | 0.9700 | 0.9450 |
|             | NetMHCcons-1.1          | 0.9680 | 0.9310 | 0.9810 | 0.9560 |
|             | NetMHCstabpan-1.00.9680 | 0.9680 | 0.9310 | 0.9820 | 0.9570 |
|             | DeepSeqPan              | 0.9510 | 0.8810 | 0.9110 | 0.8960 |
| HLA-B*27:04 | MixMHCpred-2.0.2        | 0.9950 | 0.9760 | 0.9650 | 0.9710 |
|             | Anthem                  | 0.9930 | 0.9730 | 0.9690 | 0.9710 |
|             | HLAB                    | 0.9928 | 0.9807 | 0.9735 | 0.9771 |
|             | NetMHCpan-4.1           | 0.9900 | 0.9630 | 0.9600 | 0.9610 |
|             | NetMHCstabpan-1.00.9890 | 0.9890 | 0.9650 | 0.9510 | 0.9580 |
|             | NetMHCcons-1.1          | 0.9880 | 0.9570 | 0.9510 | 0.9540 |
|             | ACME                    | 0.9870 | 0.9480 | 0.9550 | 0.9510 |
|             | MHCNetSeq               | 0.9770 | 0.9390 | 0.9460 | 0.9430 |
|             | DeepSeqPan              | 0.9730 | 0.9250 | 0.9470 | 0.9360 |
| HLA-B*27:05 | HLAB                    | 0.9365 | 0.8273 | 0.9167 | 0.8720 |
|             | Anthem                  | 0.9130 | 0.8100 | 0.8560 | 0.8330 |
|             | MixMHCpred-2.0.2        | 0.8780 | 0.7830 | 0.7920 | 0.7880 |
|             | NetMHCpan-4.1           | 0.8620 | 0.7480 | 0.7950 | 0.7720 |
|             | ACME                    | 0.8610 | 0.7410 | 0.8080 | 0.7740 |

|             |                    |        |        |        |        |        |
|-------------|--------------------|--------|--------|--------|--------|--------|
|             | NetMHCcons-1.1     | 0.8570 | 0.7290 | 0.8060 | 0.7670 | 0.5360 |
|             | NetMHCstabpan-1.00 | 0.8570 | 0.7280 | 0.8090 | 0.7680 | 0.5380 |
|             | DeepSeqPan         | 0.8300 | 0.7060 | 0.8010 | 0.7530 | 0.5090 |
|             | MHCNetSeq          | 0.8100 | 0.7060 | 0.8090 | 0.7570 | 0.5170 |
| HLA-B*27:06 | Anthem             | 0.9920 | 0.9530 | 0.9680 | 0.9610 | 0.9220 |
|             | MixMHCpred-2.0.2   | 0.9920 | 0.9490 | 0.9700 | 0.9600 | 0.9200 |
|             | MHCNetSeq          | 0.9890 | 0.9540 | 0.9480 | 0.9510 | 0.9030 |
|             | HLAB               | 0.9833 | 0.9691 | 0.9387 | 0.9538 | 0.9081 |
|             | NetMHCpan-4.1      | 0.9810 | 0.9220 | 0.9730 | 0.9470 | 0.8960 |
|             | ACME               | 0.9810 | 0.9450 | 0.9560 | 0.9510 | 0.9010 |
|             | NetMHCstabpan-1.00 | 0.9780 | 0.9400 | 0.9460 | 0.9430 | 0.8870 |
|             | NetMHCcons-1.1     | 0.9760 | 0.9370 | 0.9430 | 0.9400 | 0.8800 |
|             | DeepSeqPan         | 0.9650 | 0.9270 | 0.9330 | 0.9300 | 0.8600 |
| HLA-B*27:07 | MixMHCpred-2.0.2   | 0.9990 | 0.9890 | 0.9890 | 0.9890 | 0.9790 |
|             | NetMHCpan-4.1      | 0.9970 | 0.9960 | 0.9860 | 0.9910 | 0.9820 |
|             | Anthem             | 0.9950 | 0.9910 | 0.9820 | 0.9870 | 0.9730 |
|             | ACME               | 0.9950 | 0.9840 | 0.9760 | 0.9800 | 0.9600 |
|             | HLAB               | 0.9944 | 0.9864 | 0.9865 | 0.9865 | 0.9729 |
|             | MHCNetSeq          | 0.9940 | 0.9870 | 0.9690 | 0.9780 | 0.9560 |
|             | NetMHCstabpan-1.00 | 0.9920 | 0.9670 | 0.9680 | 0.9680 | 0.9350 |
|             | NetMHCcons-1.1     | 0.9910 | 0.9700 | 0.9560 | 0.9630 | 0.9260 |
| HLA-B*27:08 | HLAB               | 0.9977 | 0.9947 | 0.9947 | 0.9947 | 0.9894 |
|             | Anthem             | 0.9950 | 0.9890 | 0.9800 | 0.9850 | 0.9700 |
|             | MixMHCpred-2.0.2   | 0.9950 | 0.9880 | 0.9850 | 0.9860 | 0.9720 |
|             | NetMHCpan-4.1      | 0.9920 | 0.9890 | 0.9720 | 0.9800 | 0.9610 |
|             | NetMHCstabpan-1.00 | 0.9900 | 0.9810 | 0.9650 | 0.9730 | 0.9470 |
|             | NetMHCcons-1.1     | 0.9890 | 0.9920 | 0.9570 | 0.9750 | 0.9500 |
|             | ACME               | 0.9880 | 0.9700 | 0.9630 | 0.9660 | 0.9330 |
| HLA-B*27:09 | HLAB               | 0.9853 | 0.9066 | 0.9705 | 0.9386 | 0.8789 |
|             | Anthem             | 0.9700 | 0.8940 | 0.9270 | 0.9100 | 0.8220 |
|             | NetMHCpan-4.1      | 0.9530 | 0.8770 | 0.8980 | 0.8880 | 0.7760 |
|             | MixMHCpred-2.0.2   | 0.9470 | 0.8720 | 0.8740 | 0.8730 | 0.7460 |
|             | NetMHCcons-1.1     | 0.9120 | 0.7760 | 0.9070 | 0.8410 | 0.6890 |
|             | NetMHCstabpan-1.00 | 0.9120 | 0.7720 | 0.9130 | 0.8430 | 0.6930 |
|             | ACME               | 0.9100 | 0.7650 | 0.9010 | 0.8330 | 0.6730 |
|             | MHCNetSeq          | 0.8990 | 0.8000 | 0.8580 | 0.8290 | 0.6600 |
| HLA-B*27:20 | MixMHCpred-2.0.2   | 0.9990 | 1.0000 | 0.9950 | 0.9970 | 0.9950 |
|             | NetMHCcons-1.1     | 0.9950 | 0.9950 | 0.9790 | 0.9870 | 0.9750 |
|             | NetMHCstabpan-1.00 | 0.9950 | 0.9950 | 0.9790 | 0.9870 | 0.9740 |
|             | NetMHCpan-4.1      | 0.9940 | 0.9840 | 0.9790 | 0.9820 | 0.9640 |
|             | DeepSeqPan         | 0.9800 | 0.9740 | 0.9260 | 0.9500 | 0.9030 |
|             | ACME               | 0.9780 | 0.9580 | 0.9310 | 0.9450 | 0.8910 |
|             | Anthem             | 0.9770 | 0.8840 | 0.9800 | 0.9320 | 0.8710 |
|             | HLAB               | 0.9763 | 0.8947 | 0.9500 | 0.9231 | 0.8470 |

|             |                    |        |        |        |        |        |
|-------------|--------------------|--------|--------|--------|--------|--------|
|             | MHCNetSeq          | 0.8670 | 0.8050 | 0.8210 | 0.8130 | 0.6310 |
| HLA-B*35:01 | NetMHCpan-4.1      | 0.9780 | 0.9480 | 0.9410 | 0.9440 | 0.8890 |
|             | HLAB               | 0.9700 | 0.9387 | 0.9424 | 0.9406 | 0.8812 |
|             | NetMHCstabpan-1.00 | 0.9770 | 0.9470 | 0.9370 | 0.9420 | 0.8840 |
|             | Anthem             | 0.9760 | 0.9360 | 0.9370 | 0.9370 | 0.8730 |
|             | NetMHCcons-1.1     | 0.9760 | 0.9410 | 0.9370 | 0.9390 | 0.8780 |
|             | ACME               | 0.9750 | 0.9450 | 0.9310 | 0.9380 | 0.8770 |
|             | MixMHCpred-2.0.2   | 0.9620 | 0.9140 | 0.8940 | 0.9040 | 0.8080 |
|             | DeepSeqPan         | 0.9430 | 0.8880 | 0.8660 | 0.8770 | 0.7530 |
|             | MHCNetSeq          | 0.9420 | 0.8590 | 0.8940 | 0.8760 | 0.7530 |
| HLA-B*35:03 | Anthem             | 0.9950 | 0.9720 | 0.9640 | 0.9680 | 0.9360 |
|             | HLAB               | 0.9947 | 0.9823 | 0.9755 | 0.9789 | 0.9578 |
|             | MixMHCpred-2.0.2   | 0.9940 | 0.9600 | 0.9680 | 0.9640 | 0.9280 |
|             | NetMHCpan-4.1      | 0.9940 | 0.9750 | 0.9620 | 0.9690 | 0.9370 |
|             | NetMHCstabpan-1.00 | 0.9930 | 0.9720 | 0.9600 | 0.9660 | 0.9320 |
|             | NetMHCcons-1.1     | 0.9920 | 0.9670 | 0.9590 | 0.9630 | 0.9260 |
|             | ACME               | 0.9910 | 0.9670 | 0.9570 | 0.9620 | 0.9240 |
|             | DeepSeqPan         | 0.9810 | 0.9270 | 0.9440 | 0.9360 | 0.8720 |
|             | MHCNetSeq          | 0.9730 | 0.9310 | 0.9200 | 0.9250 | 0.8510 |
| HLA-B*35:08 | Anthem             | 0.9830 | 0.9200 | 0.9550 | 0.9370 | 0.8760 |
|             | NetMHCpan-4.1      | 0.9810 | 0.9640 | 0.9520 | 0.9580 | 0.9170 |
|             | HLAB               | 0.9802 | 0.9124 | 0.9590 | 0.9357 | 0.8724 |
|             | ACME               | 0.9780 | 0.9580 | 0.9430 | 0.9500 | 0.9010 |
|             | NetMHCcons-1.1     | 0.9770 | 0.9520 | 0.9510 | 0.9510 | 0.9030 |
|             | NetMHCstabpan-1.00 | 0.9770 | 0.9510 | 0.9470 | 0.9490 | 0.8990 |
|             | MixMHCpred-2.0.2   | 0.9630 | 0.8820 | 0.9110 | 0.8970 | 0.7950 |
|             | MHCNetSeq          | 0.9580 | 0.8830 | 0.9060 | 0.8940 | 0.7890 |
|             | DeepSeqPan         | 0.9440 | 0.8830 | 0.8800 | 0.8820 | 0.7640 |
| HLA-B*37:01 | Anthem             | 0.9950 | 0.9770 | 0.9780 | 0.9780 | 0.9550 |
|             | HLAB               | 0.9911 | 0.9753 | 0.9739 | 0.9746 | 0.9492 |
|             | NetMHCpan-4.1      | 0.9910 | 0.9910 | 0.9680 | 0.9790 | 0.9590 |
|             | NetMHCstabpan-1.00 | 0.9910 | 0.9700 | 0.9610 | 0.9660 | 0.9320 |
|             | NetMHCcons-1.1     | 0.9900 | 0.9640 | 0.9570 | 0.9610 | 0.9220 |
|             | ACME               | 0.9880 | 0.9600 | 0.9570 | 0.9590 | 0.9180 |
|             | MHCNetSeq          | 0.9630 | 0.9100 | 0.9160 | 0.9130 | 0.8260 |
|             | DeepSeqPan         | 0.9610 | 0.9250 | 0.9260 | 0.9250 | 0.8500 |
|             | MixMHCpred-2.0.2   | 0.9530 | 0.9220 | 0.8730 | 0.8970 | 0.7960 |
| HLA-B*38:01 | Anthem             | 0.9980 | 0.9920 | 0.9880 | 0.9900 | 0.9800 |
|             | MixMHCpred-2.0.2   | 0.9980 | 0.9880 | 0.9890 | 0.9890 | 0.9780 |
|             | NetMHCpan-4.1      | 0.9970 | 0.9870 | 0.9810 | 0.9850 | 0.9690 |
|             | NetMHCcons-1.1     | 0.9960 | 0.9830 | 0.9720 | 0.9780 | 0.9550 |
|             | ACME               | 0.9950 | 0.9800 | 0.9720 | 0.9760 | 0.9520 |
|             | HLAB               | 0.9944 | 0.9859 | 0.9859 | 0.9859 | 0.9718 |
|             | NetMHCstabpan-1.00 | 0.9930 | 0.9720 | 0.9660 | 0.9690 | 0.9380 |

|             |                    |        |        |        |        |        |
|-------------|--------------------|--------|--------|--------|--------|--------|
|             | MHCNetSeq          | 0.9860 | 0.9530 | 0.9430 | 0.9480 | 0.8960 |
|             | DeepSeqPan         | 0.9790 | 0.9360 | 0.9220 | 0.9290 | 0.8590 |
| HLA-B*39:01 | NetMHCpan-4.1      | 0.9890 | 0.9630 | 0.9510 | 0.9570 | 0.9150 |
|             | Anthem             | 0.9880 | 0.9440 | 0.9540 | 0.9490 | 0.8980 |
|             | HLAB               | 0.9862 | 0.9717 | 0.9717 | 0.9717 | 0.9434 |
|             | ACME               | 0.9850 | 0.9600 | 0.9430 | 0.9520 | 0.9040 |
|             | NetMHCcons-1.1     | 0.9830 | 0.9420 | 0.9340 | 0.9380 | 0.8760 |
|             | NetMHCstabpan-1.00 | 0.9830 | 0.9450 | 0.9340 | 0.9400 | 0.8790 |
|             | MixMHCpred-2.0.2   | 0.9810 | 0.9320 | 0.9380 | 0.9350 | 0.8700 |
|             | MHCNetSeq          | 0.9760 | 0.9290 | 0.9330 | 0.9310 | 0.8620 |
|             | DeepSeqPan         | 0.9460 | 0.8890 | 0.8620 | 0.8750 | 0.7510 |
| HLA-B*39:06 | HLAB               | 0.9970 | 0.9937 | 0.9716 | 0.9826 | 0.9655 |
|             | Anthem             | 0.9960 | 0.9840 | 0.9840 | 0.9840 | 0.9680 |
|             | MixMHCpred-2.0.2   | 0.9960 | 0.9810 | 0.9810 | 0.9810 | 0.9620 |
|             | NetMHCpan-4.1      | 0.9930 | 0.9680 | 0.9650 | 0.9660 | 0.9330 |
|             | ACME               | 0.9700 | 0.9360 | 0.9160 | 0.9260 | 0.8520 |
|             | NetMHCstabpan-1.00 | 0.9600 | 0.9130 | 0.8960 | 0.9050 | 0.8100 |
|             | NetMHCcons-1.1     | 0.9580 | 0.9100 | 0.8940 | 0.9020 | 0.8040 |
|             | MHCNetSeq          | 0.9390 | 0.8800 | 0.8710 | 0.8750 | 0.7510 |
| HLA-B*39:24 | MixMHCpred-2.0.2   | 0.9890 | 0.9580 | 0.9750 | 0.9670 | 0.9330 |
|             | MHCNetSeq          | 0.9890 | 0.9660 | 0.9580 | 0.9620 | 0.9240 |
|             | Anthem             | 0.9880 | 0.9590 | 0.9750 | 0.9670 | 0.9340 |
|             | NetMHCpan-4.1      | 0.9880 | 0.9780 | 0.9610 | 0.9700 | 0.9400 |
|             | ACME               | 0.9840 | 0.9680 | 0.9440 | 0.9560 | 0.9130 |
|             | NetMHCstabpan-1.00 | 0.9810 | 0.9750 | 0.9220 | 0.9480 | 0.8980 |
|             | HLAB               | 0.9779 | 0.9588 | 0.9286 | 0.9436 | 0.8876 |
|             | NetMHCcons-1.1     | 0.9780 | 0.9640 | 0.9200 | 0.9420 | 0.8850 |
| HLA-C*01:02 | NetMHCpan-4.1      | 0.9960 | 0.9800 | 0.9710 | 0.9760 | 0.9520 |
|             | HLAB               | 0.9923 | 0.9771 | 0.9810 | 0.9790 | 0.9581 |
|             | NetMHCcons-1.1     | 0.9900 | 0.9680 | 0.9550 | 0.9620 | 0.9240 |
|             | Anthem             | 0.9890 | 0.9370 | 0.9610 | 0.9490 | 0.8980 |
|             | MixMHCpred-2.0.2   | 0.9890 | 0.9470 | 0.9470 | 0.9470 | 0.8940 |
|             | NetMHCstabpan-1.00 | 0.9870 | 0.9500 | 0.9410 | 0.9450 | 0.8910 |
|             | MHCNetSeq          | 0.8730 | 0.7890 | 0.7990 | 0.7940 | 0.5890 |
| HLA-C*02:02 | Anthem             | 0.9800 | 0.9590 | 0.9130 | 0.9360 | 0.8730 |
|             | HLAB               | 0.9728 | 0.9680 | 0.9361 | 0.9521 | 0.9046 |
|             | NetMHCpan-4.1      | 0.9710 | 0.9530 | 0.9110 | 0.9320 | 0.8650 |
|             | NetMHCstabpan-1.00 | 0.9700 | 0.9550 | 0.9150 | 0.9350 | 0.8710 |
|             | NetMHCcons-1.1     | 0.9640 | 0.9480 | 0.8960 | 0.9220 | 0.8450 |
|             | MixMHCpred-2.0.2   | 0.9500 | 0.9010 | 0.8620 | 0.8810 | 0.7640 |
|             | MHCNetSeq          | 0.8550 | 0.7810 | 0.8070 | 0.7940 | 0.5880 |
| HLA-C*03:03 | Anthem             | 0.9850 | 0.9610 | 0.9400 | 0.9500 | 0.9010 |
|             | NetMHCpan-4.1      | 0.9700 | 0.9400 | 0.9210 | 0.9300 | 0.8610 |
|             | NetMHCstabpan-1.00 | 0.9700 | 0.9370 | 0.9170 | 0.9270 | 0.8550 |

|             |                    |        |        |        |        |        |
|-------------|--------------------|--------|--------|--------|--------|--------|
|             | MixMHCpred-2.0.2   | 0.9670 | 0.9160 | 0.9060 | 0.9110 | 0.8220 |
|             | NetMHCcons-1.1     | 0.9640 | 0.9320 | 0.9000 | 0.9160 | 0.8320 |
|             | HLAB               | 0.9512 | 0.9979 | 0.7703 | 0.8840 | 0.7888 |
|             | DeepSeqPan         | 0.9040 | 0.8210 | 0.8330 | 0.8270 | 0.6550 |
|             | MHCNetSeq          | 0.8670 | 0.8040 | 0.7780 | 0.7900 | 0.5820 |
| HLA-C*03:04 | Anthem             | 0.9880 | 0.9750 | 0.9370 | 0.9560 | 0.9130 |
|             | NetMHCpan-4.1      | 0.9780 | 0.9680 | 0.9340 | 0.9510 | 0.9020 |
|             | NetMHCcons-1.1     | 0.9780 | 0.9740 | 0.9280 | 0.9510 | 0.9040 |
|             | NetMHCstabpan-1.00 | 0.9780 | 0.9690 | 0.9300 | 0.9500 | 0.9000 |
|             | MixMHCpred-2.0.2   | 0.9730 | 0.9250 | 0.9140 | 0.9190 | 0.8390 |
|             | HLAB               | 0.9707 | 0.9467 | 0.9657 | 0.9562 | 0.9125 |
|             | MHCNetSeq          | 0.8540 | 0.7810 | 0.7650 | 0.7730 | 0.5460 |
| HLA-C*04:01 | HLAB               | 0.9701 | 0.9167 | 0.9470 | 0.9319 | 0.8641 |
|             | Anthem             | 0.9620 | 0.9090 | 0.9140 | 0.9120 | 0.8230 |
|             | NetMHCpan-4.1      | 0.9560 | 0.9130 | 0.9090 | 0.9110 | 0.8220 |
|             | NetMHCstabpan-1.00 | 0.9520 | 0.9120 | 0.8990 | 0.9050 | 0.8100 |
|             | NetMHCcons-1.1     | 0.9420 | 0.8940 | 0.8710 | 0.8820 | 0.7650 |
|             | MixMHCpred-2.0.2   | 0.9190 | 0.8570 | 0.8390 | 0.8480 | 0.6960 |
|             | DeepSeqPan         | 0.8430 | 0.7820 | 0.7580 | 0.7700 | 0.5410 |
|             | MHCNetSeq          | 0.5530 | 0.4600 | 0.7500 | 0.6050 | 0.2190 |
| HLA-C*05:01 | Anthem             | 0.9910 | 0.9520 | 0.9570 | 0.9550 | 0.9100 |
|             | NetMHCpan-4.1      | 0.9900 | 0.9580 | 0.9500 | 0.9540 | 0.9080 |
|             | NetMHCstabpan-1.00 | 0.9870 | 0.9620 | 0.9440 | 0.9530 | 0.9060 |
|             | MixMHCpred-2.0.2   | 0.9860 | 0.9420 | 0.9300 | 0.9360 | 0.8720 |
|             | NetMHCcons-1.1     | 0.9860 | 0.9590 | 0.9380 | 0.9490 | 0.8980 |
|             | HLAB               | 0.9746 | 0.9768 | 0.9496 | 0.9632 | 0.9267 |
|             | DeepSeqPan         | 0.9530 | 0.8920 | 0.8780 | 0.8850 | 0.7700 |
|             | MHCNetSeq          | 0.9180 | 0.8470 | 0.8580 | 0.8530 | 0.7050 |
| HLA-C*06:02 | Anthem             | 0.9810 | 0.9490 | 0.9270 | 0.9380 | 0.8760 |
|             | HLAB               | 0.9772 | 0.9611 | 0.9322 | 0.9467 | 0.8937 |
|             | NetMHCpan-4.1      | 0.9760 | 0.9510 | 0.9300 | 0.9400 | 0.8810 |
|             | NetMHCstabpan-1.00 | 0.9720 | 0.9380 | 0.9230 | 0.9300 | 0.8610 |
|             | NetMHCcons-1.1     | 0.9670 | 0.9340 | 0.9060 | 0.9200 | 0.8410 |
|             | MixMHCpred-2.0.2   | 0.9560 | 0.8810 | 0.8930 | 0.8870 | 0.7740 |
|             | DeepSeqPan         | 0.8640 | 0.7860 | 0.7760 | 0.7810 | 0.5630 |
|             | MHCNetSeq          | 0.7710 | 0.6840 | 0.7800 | 0.7320 | 0.4660 |
| HLA-C*07:01 | Anthem             | 0.9750 | 0.9330 | 0.9240 | 0.9290 | 0.8570 |
|             | HLAB               | 0.9708 | 0.9606 | 0.9368 | 0.9487 | 0.8977 |
|             | NetMHCpan-4.1      | 0.9700 | 0.9560 | 0.9250 | 0.9400 | 0.8810 |
|             | NetMHCstabpan-1.00 | 0.9660 | 0.9430 | 0.9110 | 0.9270 | 0.8550 |
|             | NetMHCcons-1.1     | 0.9570 | 0.9190 | 0.8920 | 0.9060 | 0.8120 |
|             | MixMHCpred-2.0.2   | 0.9140 | 0.8550 | 0.8200 | 0.8370 | 0.6760 |
|             | DeepSeqPan         | 0.8550 | 0.7750 | 0.7920 | 0.7840 | 0.5680 |
|             | MHCNetSeq          | 0.8470 | 0.7640 | 0.7620 | 0.7630 | 0.5260 |

|             |                    |        |        |        |        |        |
|-------------|--------------------|--------|--------|--------|--------|--------|
| HLA-C*07:02 | Anthem             | 0.9820 | 0.9530 | 0.9210 | 0.9370 | 0.8750 |
|             | NetMHCpan-4.1      | 0.9740 | 0.9370 | 0.9160 | 0.9260 | 0.8530 |
|             | NetMHCstabpan-1.00 | 0.9700 | 0.9150 | 0.9190 | 0.9170 | 0.8340 |
|             | NetMHCcons-1.1     | 0.9670 | 0.9170 | 0.9010 | 0.9090 | 0.8180 |
|             | MixMHCpred-2.0.2   | 0.9540 | 0.8910 | 0.8860 | 0.8880 | 0.7770 |
|             | HLAB               | 0.9493 | 0.8328 | 0.9358 | 0.8843 | 0.7728 |
|             | DeepSeqPan         | 0.8390 | 0.7450 | 0.7730 | 0.7590 | 0.5190 |
|             | MHCNetSeq          | 0.8020 | 0.7210 | 0.8100 | 0.7650 | 0.5320 |
| HLA-C*07:04 | Anthem             | 0.9800 | 0.9360 | 0.9290 | 0.9330 | 0.8660 |
|             | HLAB               | 0.9781 | 0.9615 | 0.8352 | 0.8983 | 0.8030 |
|             | NetMHCpan-4.1      | 0.9730 | 0.9600 | 0.9100 | 0.9350 | 0.8720 |
|             | NetMHCstabpan-1.00 | 0.9620 | 0.9470 | 0.8950 | 0.9210 | 0.8440 |
|             | NetMHCcons-1.1     | 0.9040 | 0.8500 | 0.8170 | 0.8330 | 0.6670 |
|             | MHCNetSeq          | 0.6510 | 0.5780 | 0.6640 | 0.6210 | 0.2430 |
| HLA-C*08:02 | Anthem             | 0.9870 | 0.9670 | 0.9370 | 0.9520 | 0.9050 |
|             | HLAB               | 0.9799 | 0.9593 | 0.9613 | 0.9603 | 0.9206 |
|             | NetMHCpan-4.1      | 0.9770 | 0.9690 | 0.9240 | 0.9460 | 0.8940 |
|             | NetMHCstabpan-1.00 | 0.9770 | 0.9570 | 0.9210 | 0.9390 | 0.8780 |
|             | NetMHCcons-1.1     | 0.9640 | 0.9340 | 0.8740 | 0.9040 | 0.8090 |
|             | MixMHCpred-2.0.2   | 0.9440 | 0.8830 | 0.8570 | 0.8700 | 0.7410 |
|             | DeepSeqPan         | 0.9270 | 0.8760 | 0.8250 | 0.8510 | 0.7030 |
|             | MHCNetSeq          | 0.8010 | 0.7390 | 0.7400 | 0.7400 | 0.4800 |
| HLA-C*12:03 | Anthem             | 0.9890 | 0.9600 | 0.9480 | 0.9540 | 0.9080 |
|             | HLAB               | 0.9845 | 0.9867 | 0.9069 | 0.9467 | 0.8964 |
|             | NetMHCcons-1.1     | 0.9810 | 0.9410 | 0.9260 | 0.9330 | 0.8670 |
|             | NetMHCpan-4.1      | 0.9800 | 0.9350 | 0.9210 | 0.9280 | 0.8560 |
|             | MixMHCpred-2.0.2   | 0.9760 | 0.9260 | 0.9150 | 0.9210 | 0.8410 |
|             | NetMHCstabpan-1.00 | 0.9720 | 0.9300 | 0.9100 | 0.9200 | 0.8410 |
|             | DeepSeqPan         | 0.9170 | 0.8720 | 0.8440 | 0.8580 | 0.7160 |
|             | MHCNetSeq          | 0.7980 | 0.7190 | 0.7560 | 0.7380 | 0.4760 |
| HLA-C*14:02 | NetMHCpan-4.1      | 0.9960 | 0.9840 | 0.9790 | 0.9810 | 0.9620 |
|             | Anthem             | 0.9930 | 0.9680 | 0.9670 | 0.9680 | 0.9350 |
|             | NetMHCstabpan-1.00 | 0.9930 | 0.9730 | 0.9600 | 0.9670 | 0.9340 |
|             | MixMHCpred-2.0.2   | 0.9920 | 0.9520 | 0.9650 | 0.9580 | 0.9170 |
|             | NetMHCcons-1.1     | 0.9920 | 0.9740 | 0.9620 | 0.9680 | 0.9360 |
|             | HLAB               | 0.9918 | 0.9836 | 0.9619 | 0.9727 | 0.9457 |
|             | DeepSeqPan         | 0.9390 | 0.8830 | 0.8510 | 0.8670 | 0.7350 |
|             | MHCNetSeq          | 0.5280 | 0.5020 | 0.5010 | 0.5020 | 0.0030 |
| HLA-C*15:02 | MixMHCpred-2.0.2   | 0.9890 | 0.9560 | 0.9600 | 0.9580 | 0.9170 |
|             | Anthem             | 0.9880 | 0.9590 | 0.9560 | 0.9580 | 0.9150 |
|             | NetMHCpan-4.1      | 0.9880 | 0.9640 | 0.9540 | 0.9590 | 0.9180 |
|             | NetMHCcons-1.1     | 0.9840 | 0.9730 | 0.9310 | 0.9520 | 0.9050 |
|             | NetMHCstabpan-1.00 | 0.9800 | 0.9460 | 0.9350 | 0.9400 | 0.8810 |
|             | HLAB               | 0.9769 | 0.9640 | 0.9392 | 0.9516 | 0.9035 |

|    |             |                    |        |        |        |        |        |
|----|-------------|--------------------|--------|--------|--------|--------|--------|
|    |             | DeepSeqPan         | 0.9480 | 0.8830 | 0.8950 | 0.8890 | 0.7780 |
|    |             | MHCNetSeq          | 0.9260 | 0.8320 | 0.8710 | 0.8520 | 0.7050 |
|    | HLA-C*16:01 | Anthem             | 0.9890 | 0.9720 | 0.9330 | 0.9530 | 0.9070 |
|    |             | HLAB               | 0.9831 | 0.9449 | 0.9572 | 0.9510 | 0.9021 |
|    |             | NetMHCpan-4.1      | 0.9800 | 0.9610 | 0.9140 | 0.9380 | 0.8760 |
|    |             | NetMHCstabpan-1.00 | 0.9670 | 0.9340 | 0.9100 | 0.9220 | 0.8440 |
|    |             | NetMHCcons-1.1     | 0.9660 | 0.9350 | 0.9060 | 0.9200 | 0.8410 |
|    |             | MixMHCpred-2.0.2   | 0.9600 | 0.8720 | 0.9030 | 0.8880 | 0.7760 |
|    |             | MHCNetSeq          | 0.6890 | 0.6280 | 0.6820 | 0.6550 | 0.3110 |
|    | HLA-C*17:01 | Anthem             | 0.9830 | 0.9050 | 0.9580 | 0.9310 | 0.8640 |
|    |             | NetMHCpan-4.1      | 0.9790 | 0.9190 | 0.9410 | 0.9300 | 0.8610 |
|    |             | NetMHCstabpan-1.00 | 0.9690 | 0.9200 | 0.9190 | 0.9200 | 0.8390 |
|    |             | MixMHCpred-2.0.2   | 0.9620 | 0.9050 | 0.9480 | 0.9270 | 0.8540 |
|    |             | HLAB               | 0.9605 | 0.9167 | 0.9176 | 0.9172 | 0.8343 |
|    |             | NetMHCcons-1.1     | 0.9380 | 0.8640 | 0.9240 | 0.8940 | 0.7900 |
|    |             | MHCNetSeq          | 0.8550 | 0.8310 | 0.7750 | 0.8030 | 0.6070 |
| 10 | HLA-A*01:01 | NetMHCpan-4.1      | 0.9880 | 0.9570 | 0.9570 | 0.9570 | 0.9140 |
|    |             | Anthem             | 0.9860 | 0.9580 | 0.9510 | 0.9540 | 0.9090 |
|    |             | NetMHCcons-1.1     | 0.9810 | 0.9190 | 0.9320 | 0.9260 | 0.8510 |
|    |             | MixMHCpred-2.0.2   | 0.9800 | 0.9370 | 0.9370 | 0.9370 | 0.8740 |
|    |             | HLAB               | 0.9779 | 0.9843 | 0.9487 | 0.9665 | 0.9336 |
|    |             | NetMHCstabpan-1.00 | 0.9760 | 0.9070 | 0.9320 | 0.9200 | 0.8400 |
|    |             | ACME               | 0.9680 | 0.9050 | 0.9080 | 0.9060 | 0.8130 |
|    |             | MHCNetSeq          | 0.9420 | 0.8680 | 0.8760 | 0.8720 | 0.7440 |
|    | HLA-A*02:01 | HLAB               | 0.9573 | 0.9754 | 0.7075 | 0.8414 | 0.7088 |
|    |             | Anthem             | 0.9480 | 0.8880 | 0.8850 | 0.8860 | 0.7730 |
|    |             | NetMHCcons-1.1     | 0.9430 | 0.8680 | 0.8870 | 0.8780 | 0.7560 |
|    |             | NetMHCstabpan-1.00 | 0.9420 | 0.8740 | 0.8760 | 0.8750 | 0.7500 |
|    |             | NetMHCpan-4.1      | 0.9330 | 0.8680 | 0.8770 | 0.8720 | 0.7440 |
|    |             | ACME               | 0.9310 | 0.8640 | 0.8880 | 0.8760 | 0.7530 |
|    |             | MixMHCpred-2.0.2   | 0.9190 | 0.8450 | 0.8480 | 0.8460 | 0.6930 |
|    |             | MHCNetSeq          | 0.9000 | 0.8190 | 0.8720 | 0.8450 | 0.6910 |
|    | HLA-A*02:02 | MixMHCpred-2.0.2   | 0.9650 | 0.9400 | 0.9070 | 0.9230 | 0.8460 |
|    |             | HLAB               | 0.9572 | 0.9500 | 0.8856 | 0.9177 | 0.8372 |
|    |             | Anthem             | 0.9460 | 0.9590 | 0.8460 | 0.9020 | 0.8110 |
|    |             | NetMHCcons-1.1     | 0.9320 | 0.8670 | 0.8650 | 0.8660 | 0.7320 |
|    |             | NetMHCstabpan-1.00 | 0.9280 | 0.8710 | 0.8640 | 0.8680 | 0.7360 |
|    |             | ACME               | 0.9270 | 0.8930 | 0.8390 | 0.8660 | 0.7340 |
|    |             | NetMHCpan-4.1      | 0.9130 | 0.8550 | 0.8410 | 0.8480 | 0.6970 |
|    |             | MHCNetSeq          | 0.7830 | 0.6960 | 0.8090 | 0.7520 | 0.5080 |
|    | HLA-A*02:03 | HLAB               | 0.9765 | 0.9500 | 0.9315 | 0.9407 | 0.8816 |
|    |             | Anthem             | 0.9640 | 0.9340 | 0.8850 | 0.9100 | 0.8210 |
|    |             | NetMHCcons-1.1     | 0.9590 | 0.9080 | 0.8850 | 0.8960 | 0.7930 |
|    |             | NetMHCstabpan-1.00 | 0.9560 | 0.9030 | 0.8840 | 0.8940 | 0.7880 |

|             |                    |        |        |        |        |        |
|-------------|--------------------|--------|--------|--------|--------|--------|
|             | ACME               | 0.9550 | 0.9080 | 0.8710 | 0.8900 | 0.7800 |
|             | NetMHCpan-4.1      | 0.9450 | 0.8910 | 0.8700 | 0.8800 | 0.7610 |
|             | MixMHCpred-2.0.2   | 0.9030 | 0.7920 | 0.8540 | 0.8230 | 0.6480 |
|             | MHCNetSeq          | 0.8910 | 0.8180 | 0.8450 | 0.8320 | 0.6640 |
| HLA-A*02:04 | HLAB               | 0.9970 | 0.9355 | 1.0000 | 0.9683 | 0.9383 |
|             | NetMHCpan-4.1      | 0.9940 | 0.9710 | 0.9840 | 0.9780 | 0.9550 |
|             | MixMHCpred-2.0.2   | 0.9920 | 0.9680 | 0.9810 | 0.9740 | 0.9490 |
|             | NetMHCcons-1.1     | 0.9900 | 0.9710 | 0.9710 | 0.9710 | 0.9420 |
|             | NetMHCstabpan-1.00 | 0.9900 | 0.9680 | 0.9680 | 0.9680 | 0.9360 |
|             | ACME               | 0.9880 | 0.9420 | 0.9740 | 0.9580 | 0.9170 |
|             | MHCNetSeq          | 0.9880 | 0.9380 | 0.9710 | 0.9550 | 0.9100 |
|             | Anthem             | 0.9650 | 0.8190 | 0.9670 | 0.8930 | 0.7970 |
| HLA-A*02:05 | NetMHCcons-1.1     | 0.9870 | 0.9820 | 0.9650 | 0.9730 | 0.9470 |
|             | NetMHCpan-4.1      | 0.9860 | 0.9730 | 0.9610 | 0.9670 | 0.9350 |
|             | NetMHCstabpan-1.00 | 0.9860 | 0.9780 | 0.9600 | 0.9690 | 0.9380 |
|             | ACME               | 0.9850 | 0.9690 | 0.9530 | 0.9610 | 0.9230 |
|             | HLAB               | 0.9840 | 0.9733 | 0.9211 | 0.9470 | 0.8953 |
|             | MHCNetSeq          | 0.9760 | 0.9210 | 0.9200 | 0.9210 | 0.8420 |
|             | Anthem             | 0.9750 | 0.8720 | 0.9520 | 0.9120 | 0.8280 |
|             | MixMHCpred-2.0.2   | 0.9550 | 0.8780 | 0.9000 | 0.8890 | 0.7800 |
| HLA-A*02:06 | HLAB               | 0.9636 | 0.9671 | 0.8879 | 0.9274 | 0.8575 |
|             | Anthem             | 0.9510 | 0.9180 | 0.8700 | 0.8940 | 0.7890 |
|             | NetMHCstabpan-1.00 | 0.9490 | 0.9000 | 0.8690 | 0.8850 | 0.7700 |
|             | NetMHCcons-1.1     | 0.9480 | 0.9160 | 0.8560 | 0.8860 | 0.7740 |
|             | NetMHCpan-4.1      | 0.9370 | 0.8520 | 0.8740 | 0.8630 | 0.7270 |
|             | ACME               | 0.9370 | 0.9030 | 0.8470 | 0.8750 | 0.7520 |
|             | MHCNetSeq          | 0.8470 | 0.7510 | 0.8430 | 0.7970 | 0.5970 |
|             | MixMHCpred-2.0.2   | 0.7840 | 0.7310 | 0.7170 | 0.7240 | 0.4490 |
| HLA-A*02:07 | HLAB               | 0.9713 | 0.8913 | 0.9462 | 0.9189 | 0.8390 |
|             | MixMHCpred-2.0.2   | 0.9700 | 0.9280 | 0.9440 | 0.9360 | 0.8720 |
|             | MHCNetSeq          | 0.9630 | 0.9060 | 0.9340 | 0.9200 | 0.8400 |
|             | Anthem             | 0.9560 | 0.8700 | 0.9670 | 0.9180 | 0.8400 |
|             | NetMHCpan-4.1      | 0.9560 | 0.8950 | 0.9470 | 0.9210 | 0.8440 |
|             | NetMHCcons-1.1     | 0.9420 | 0.8890 | 0.9040 | 0.8970 | 0.7940 |
|             | NetMHCstabpan-1.00 | 0.9390 | 0.8970 | 0.8970 | 0.8970 | 0.7940 |
|             | ACME               | 0.8960 | 0.8210 | 0.8660 | 0.8430 | 0.6890 |
| HLA-A*02:17 | MixMHCpred-2.0.2   | 0.9950 | 0.9970 | 0.9900 | 0.9930 | 0.9870 |
|             | NetMHCstabpan-1.00 | 0.9910 | 0.9900 | 0.9670 | 0.9780 | 0.9570 |
|             | HLAB               | 0.9903 | 0.9000 | 1.0000 | 0.9508 | 0.9059 |
|             | NetMHCcons-1.1     | 0.9900 | 0.9900 | 0.9700 | 0.9800 | 0.9600 |
|             | NetMHCpan-4.1      | 0.9860 | 0.9870 | 0.9670 | 0.9770 | 0.9540 |
|             | Anthem             | 0.9850 | 0.9730 | 0.9530 | 0.9630 | 0.9280 |
|             | ACME               | 0.9800 | 0.9900 | 0.9330 | 0.9620 | 0.9250 |
|             | MHCNetSeq          | 0.9770 | 1.0000 | 0.9540 | 0.9760 | 0.9550 |



|             |                    |        |        |        |        |        |
|-------------|--------------------|--------|--------|--------|--------|--------|
| HLA-A*03:01 | HLAB               | 0.9770 | 0.9577 | 0.9296 | 0.9436 | 0.8876 |
|             | NetMHCcons-1.1     | 0.9770 | 0.9460 | 0.9270 | 0.9360 | 0.8720 |
|             | NetMHCpan-4.1      | 0.9750 | 0.9340 | 0.9290 | 0.9310 | 0.8630 |
|             | NetMHCstabpan-1.00 | 0.9740 | 0.9260 | 0.9280 | 0.9270 | 0.8550 |
|             | ACME               | 0.9730 | 0.9340 | 0.9440 | 0.9390 | 0.8780 |
|             | Anthem             | 0.9720 | 0.9500 | 0.9210 | 0.9350 | 0.8720 |
|             | MixMHCpred-2.0.2   | 0.9480 | 0.8760 | 0.8900 | 0.8830 | 0.7660 |
|             | MHCNetSeq          | 0.9140 | 0.8250 | 0.8820 | 0.8540 | 0.7090 |
| HLA-A*11:01 | NetMHCcons-1.1     | 0.9830 | 0.9550 | 0.9270 | 0.9410 | 0.8830 |
|             | NetMHCpan-4.1      | 0.9820 | 0.9520 | 0.9300 | 0.9410 | 0.8820 |
|             | Anthem             | 0.9810 | 0.9530 | 0.9260 | 0.9390 | 0.8790 |
|             | NetMHCstabpan-1.00 | 0.9810 | 0.9460 | 0.9300 | 0.9380 | 0.8760 |
|             | ACME               | 0.9810 | 0.9560 | 0.9390 | 0.9480 | 0.8960 |
|             | HLAB               | 0.9748 | 0.9575 | 0.9423 | 0.9499 | 0.8999 |
|             | MHCNetSeq          | 0.9480 | 0.8760 | 0.9100 | 0.8930 | 0.7860 |
|             | MixMHCpred-2.0.2   | 0.9460 | 0.8690 | 0.8790 | 0.8740 | 0.7490 |
| HLA-A*23:01 | NetMHCcons-1.1     | 0.9820 | 0.9590 | 0.9350 | 0.9470 | 0.8940 |
|             | NetMHCpan-4.1      | 0.9810 | 0.9620 | 0.9520 | 0.9570 | 0.9140 |
|             | HLAB               | 0.9784 | 0.9322 | 0.9412 | 0.9367 | 0.8734 |
|             | NetMHCstabpan-1.00 | 0.9780 | 0.9440 | 0.9290 | 0.9360 | 0.8730 |
|             | ACME               | 0.9740 | 0.9580 | 0.9480 | 0.9530 | 0.9060 |
|             | Anthem             | 0.9680 | 0.8680 | 0.9570 | 0.9120 | 0.8280 |
|             | MixMHCpred-2.0.2   | 0.9600 | 0.9210 | 0.8990 | 0.9100 | 0.8210 |
|             | MHCNetSeq          | 0.9570 | 0.8950 | 0.9110 | 0.9030 | 0.8070 |
| HLA-A*24:02 | HLAB               | 0.9913 | 0.9680 | 0.9594 | 0.9637 | 0.9275 |
|             | NetMHCcons-1.1     | 0.9900 | 0.9650 | 0.9440 | 0.9550 | 0.9100 |
|             | Anthem             | 0.9890 | 0.9560 | 0.9470 | 0.9520 | 0.9040 |
|             | NetMHCstabpan-1.00 | 0.9890 | 0.9620 | 0.9420 | 0.9520 | 0.9040 |
|             | MixMHCpred-2.0.2   | 0.9880 | 0.9510 | 0.9420 | 0.9460 | 0.8930 |
|             | NetMHCpan-4.1      | 0.9880 | 0.9560 | 0.9530 | 0.9550 | 0.9100 |
|             | ACME               | 0.9860 | 0.9470 | 0.9500 | 0.9490 | 0.8970 |
|             | MHCNetSeq          | 0.9840 | 0.9470 | 0.9400 | 0.9430 | 0.8870 |
| HLA-A*24:06 | HLAB               | 1.0000 | 1.0000 | 1.0000 | 1.0000 | 1.0000 |
|             | MixMHCpred-2.0.2   | 1.0000 | 1.0000 | 0.9950 | 0.9970 | 0.9950 |
|             | MHCNetSeq          | 0.9990 | 1.0000 | 0.9950 | 0.9970 | 0.9950 |
|             | NetMHCpan-4.1      | 0.9960 | 1.0000 | 0.9850 | 0.9920 | 0.9860 |
|             | NetMHCstabpan-1.00 | 0.9950 | 1.0000 | 0.9800 | 0.9900 | 0.9810 |
|             | NetMHCcons-1.1     | 0.9940 | 1.0000 | 0.9800 | 0.9900 | 0.9810 |
|             | Anthem             | 0.9810 | 0.9300 | 0.9740 | 0.9520 | 0.9060 |
| HLA-A*26:01 | ACME               | 0.9850 | 0.9720 | 0.9630 | 0.9680 | 0.9350 |
|             | HLAB               | 0.9801 | 0.9385 | 0.9697 | 0.9542 | 0.9088 |
|             | NetMHCcons-1.1     | 0.9790 | 0.9260 | 0.9430 | 0.9350 | 0.8700 |
|             | NetMHCpan-4.1      | 0.9770 | 0.9230 | 0.9580 | 0.9410 | 0.8820 |
|             | Anthem             | 0.9740 | 0.9410 | 0.9440 | 0.9430 | 0.8860 |

|             |                         |        |        |        |        |
|-------------|-------------------------|--------|--------|--------|--------|
|             | NetMHCstabpan-1.00.9670 | 0.9050 | 0.9260 | 0.9150 | 0.8320 |
|             | MixMHCpred-2.0.2        | 0.9380 | 0.8970 | 0.8970 | 0.7940 |
|             | MHCNetSeq               | 0.9240 | 0.8590 | 0.9170 | 0.8880 |
| HLA-A*29:02 | MixMHCpred-2.0.2        | 0.9800 | 0.9420 | 0.9340 | 0.9380 |
|             | HLAB                    | 0.9770 | 0.9224 | 0.9512 | 0.9369 |
|             | Anthem                  | 0.9770 | 0.9200 | 0.9510 | 0.9360 |
|             | NetMHCpan-4.1           | 0.9770 | 0.9310 | 0.9470 | 0.9390 |
|             | NetMHCcons-1.1          | 0.9760 | 0.9300 | 0.9480 | 0.9390 |
|             | ACME                    | 0.9720 | 0.9370 | 0.9390 | 0.9380 |
|             | NetMHCstabpan-1.00.9710 | 0.9710 | 0.9250 | 0.9320 | 0.9280 |
|             | MHCNetSeq               | 0.9320 | 0.8550 | 0.9180 | 0.8870 |
| HLA-A*30:01 | Anthem                  | 0.9230 | 0.8310 | 0.8580 | 0.8440 |
|             | ACME                    | 0.9190 | 0.8310 | 0.8620 | 0.8460 |
|             | NetMHCcons-1.1          | 0.8910 | 0.8870 | 0.7740 | 0.8310 |
|             | NetMHCpan-4.1           | 0.8560 | 0.8340 | 0.8230 | 0.8280 |
|             | NetMHCstabpan-1.00.8270 | 0.8270 | 0.7720 | 0.7590 | 0.7650 |
|             | HLAB                    | 0.8038 | 0.8718 | 0.4500 | 0.6582 |
|             | MixMHCpred-2.0.2        | 0.7850 | 0.7280 | 0.7280 | 0.7280 |
|             | MHCNetSeq               | 0.6660 | 0.5590 | 0.7900 | 0.6740 |
| HLA-A*30:02 | MixMHCpred-2.0.2        | 0.9880 | 0.9720 | 0.9710 | 0.9710 |
|             | NetMHCcons-1.1          | 0.9820 | 0.9660 | 0.9550 | 0.9610 |
|             | ACME                    | 0.9780 | 0.9620 | 0.9450 | 0.9540 |
|             | Anthem                  | 0.9760 | 0.9240 | 0.9500 | 0.9370 |
|             | NetMHCpan-4.1           | 0.9720 | 0.9350 | 0.9510 | 0.9430 |
|             | NetMHCstabpan-1.00.9670 | 0.9670 | 0.9200 | 0.9250 | 0.9220 |
|             | HLAB                    | 0.9577 | 0.9014 | 0.9444 | 0.9231 |
|             | MHCNetSeq               | 0.7920 | 0.6800 | 0.8750 | 0.7780 |
| HLA-A*31:01 | HLAB                    | 0.9680 | 0.9447 | 0.8941 | 0.9193 |
|             | Anthem                  | 0.9570 | 0.9290 | 0.8880 | 0.9080 |
|             | NetMHCpan-4.1           | 0.9510 | 0.8990 | 0.8790 | 0.8890 |
|             | NetMHCcons-1.1          | 0.9500 | 0.8990 | 0.8810 | 0.8900 |
|             | NetMHCstabpan-1.00.9500 | 0.9500 | 0.9000 | 0.8830 | 0.8920 |
|             | ACME                    | 0.9450 | 0.8990 | 0.8770 | 0.8880 |
|             | MixMHCpred-2.0.2        | 0.8690 | 0.7890 | 0.8060 | 0.7980 |
|             | MHCNetSeq               | 0.8490 | 0.7640 | 0.8320 | 0.7990 |
| HLA-A*32:01 | ACME                    | 0.9640 | 0.9150 | 0.9150 | 0.9150 |
|             | NetMHCcons-1.1          | 0.9590 | 0.9010 | 0.9130 | 0.9070 |
|             | Anthem                  | 0.9570 | 0.8630 | 0.9420 | 0.9020 |
|             | NetMHCpan-4.1           | 0.9560 | 0.9210 | 0.9470 | 0.9340 |
|             | NetMHCstabpan-1.00.9430 | 0.9430 | 0.8880 | 0.9090 | 0.8980 |
|             | MixMHCpred-2.0.2        | 0.9390 | 0.8930 | 0.9010 | 0.8960 |
|             | HLAB                    | 0.9366 | 0.8783 | 0.9224 | 0.9004 |
|             | MHCNetSeq               | 0.9180 | 0.8610 | 0.9140 | 0.8870 |
| HLA-A*33:01 | HLAB                    | 0.9824 | 1.0000 | 0.9242 | 0.9267 |

|             |                    |        |        |        |        |        |
|-------------|--------------------|--------|--------|--------|--------|--------|
|             | MixMHCpred-2.0.2   | 0.9810 | 0.9590 | 0.9360 | 0.9470 | 0.8950 |
|             | Anthem             | 0.9720 | 0.9460 | 0.9130 | 0.9300 | 0.8610 |
|             | NetMHCcons-1.1     | 0.9620 | 0.9400 | 0.8950 | 0.9170 | 0.8360 |
|             | NetMHCstabpan-1.00 | 0.9620 | 0.9410 | 0.9020 | 0.9210 | 0.8440 |
|             | ACME               | 0.9590 | 0.9120 | 0.9100 | 0.9110 | 0.8220 |
|             | NetMHCpan-4.1      | 0.9570 | 0.9160 | 0.9070 | 0.9110 | 0.8230 |
|             | MHCNetSeq          | 0.8520 | 0.7740 | 0.8270 | 0.8000 | 0.6020 |
| HLA-A*68:01 | HLAB               | 0.9845 | 0.8056 | 0.9751 | 0.8904 | 0.7922 |
|             | Anthem             | 0.9740 | 0.9430 | 0.9240 | 0.9340 | 0.8670 |
|             | ACME               | 0.9730 | 0.9530 | 0.9130 | 0.9340 | 0.8670 |
|             | NetMHCcons-1.1     | 0.9700 | 0.9420 | 0.9130 | 0.9270 | 0.8550 |
|             | NetMHCpan-4.1      | 0.9690 | 0.9450 | 0.9100 | 0.9270 | 0.8550 |
|             | NetMHCstabpan-1.00 | 0.9660 | 0.9280 | 0.9070 | 0.9170 | 0.8350 |
|             | MixMHCpred-2.0.2   | 0.9000 | 0.8070 | 0.8590 | 0.8330 | 0.6670 |
|             | MHCNetSeq          | 0.8370 | 0.7580 | 0.8220 | 0.7900 | 0.5820 |
| HLA-A*68:02 | HLAB               | 0.9436 | 0.9010 | 0.9046 | 0.9028 | 0.8056 |
|             | Anthem             | 0.9310 | 0.8710 | 0.8830 | 0.8770 | 0.7550 |
|             | NetMHCcons-1.1     | 0.9200 | 0.8600 | 0.8650 | 0.8630 | 0.7260 |
|             | ACME               | 0.9200 | 0.8580 | 0.8980 | 0.8780 | 0.7560 |
|             | NetMHCstabpan-1.00 | 0.9180 | 0.8600 | 0.8620 | 0.8610 | 0.7220 |
|             | NetMHCpan-4.1      | 0.9160 | 0.8460 | 0.8740 | 0.8600 | 0.7200 |
|             | MixMHCpred-2.0.2   | 0.8850 | 0.7900 | 0.8460 | 0.8180 | 0.6380 |
|             | MHCNetSeq          | 0.7790 | 0.6730 | 0.7620 | 0.7180 | 0.4380 |
| HLA-A*69:01 | NetMHCpan-4.1      | 0.9850 | 0.9680 | 0.9520 | 0.9600 | 0.9210 |
|             | HLAB               | 0.9815 | 0.9600 | 0.9231 | 0.9412 | 0.8831 |
|             | Anthem             | 0.9750 | 0.9360 | 0.9250 | 0.9300 | 0.8620 |
|             | NetMHCcons-1.1     | 0.9650 | 0.9160 | 0.9120 | 0.9140 | 0.8290 |
|             | ACME               | 0.9640 | 0.9200 | 0.9160 | 0.9180 | 0.8370 |
|             | NetMHCstabpan-1.00 | 0.9590 | 0.9200 | 0.9040 | 0.9120 | 0.8250 |
|             | MixMHCpred-2.0.2   | 0.9440 | 0.8800 | 0.8800 | 0.8800 | 0.7620 |
|             | MHCNetSeq          | 0.8980 | 0.8000 | 0.9000 | 0.8500 | 0.7050 |
| HLA-B*07:02 | NetMHCcons-1.1     | 0.9890 | 0.9630 | 0.9620 | 0.9620 | 0.9250 |
|             | NetMHCstabpan-1.00 | 0.9890 | 0.9590 | 0.9590 | 0.9590 | 0.9180 |
|             | Anthem             | 0.9880 | 0.9590 | 0.9550 | 0.9570 | 0.9140 |
|             | NetMHCpan-4.1      | 0.9880 | 0.9600 | 0.9550 | 0.9570 | 0.9140 |
|             | ACME               | 0.9880 | 0.9590 | 0.9580 | 0.9590 | 0.9180 |
|             | HLAB               | 0.9854 | 0.9720 | 0.9590 | 0.9655 | 0.9311 |
|             | MixMHCpred-2.0.2   | 0.9840 | 0.9420 | 0.9390 | 0.9410 | 0.8820 |
|             | MHCNetSeq          | 0.9810 | 0.9320 | 0.9460 | 0.9390 | 0.8780 |
| HLA-B*08:01 | ACME               | 0.9830 | 0.9800 | 0.9450 | 0.9620 | 0.9260 |
|             | NetMHCcons-1.1     | 0.9760 | 0.9530 | 0.9320 | 0.9420 | 0.8850 |
|             | NetMHCpan-4.1      | 0.9680 | 0.9310 | 0.9100 | 0.9200 | 0.8410 |
|             | Anthem             | 0.9650 | 0.8930 | 0.9240 | 0.9080 | 0.8190 |
|             | NetMHCstabpan-1.00 | 0.9610 | 0.9190 | 0.9000 | 0.9100 | 0.8200 |

|             |                    |        |        |        |        |        |
|-------------|--------------------|--------|--------|--------|--------|--------|
|             | HLAB               | 0.9484 | 0.9420 | 0.8571 | 0.8993 | 0.8017 |
|             | MHCNetSeq          | 0.9170 | 0.8550 | 0.8480 | 0.8520 | 0.7040 |
|             | MixMHCpred-2.0.2   | 0.8790 | 0.8390 | 0.7770 | 0.8080 | 0.6180 |
| HLA-B*13:02 | HLAB               | 0.9870 | 0.9048 | 0.9545 | 0.9302 | 0.8612 |
|             | NetMHCpan-4.1      | 0.9860 | 0.9760 | 0.9430 | 0.9590 | 0.9230 |
|             | NetMHCcons-1.1     | 0.9790 | 0.9330 | 0.9710 | 0.9520 | 0.9060 |
|             | NetMHCstabpan-1.00 | 0.9700 | 0.9190 | 0.9470 | 0.9340 | 0.8680 |
|             | Anthem             | 0.9660 | 0.8860 | 0.9400 | 0.9130 | 0.8290 |
|             | MixMHCpred-2.0.2   | 0.9420 | 0.8910 | 0.9240 | 0.9070 | 0.8160 |
|             | MHCNetSeq          | 0.9220 | 0.8860 | 0.8910 | 0.8880 | 0.7780 |
|             | ACME               | 0.8820 | 0.8620 | 0.8290 | 0.8450 | 0.6930 |
| HLA-B*14:02 | NetMHCpan-4.1      | 0.9940 | 0.9970 | 0.9840 | 0.9910 | 0.9820 |
|             | NetMHCstabpan-1.00 | 0.9900 | 1.0000 | 0.9740 | 0.9870 | 0.9750 |
|             | NetMHCcons-1.1     | 0.9850 | 0.9920 | 0.9540 | 0.9730 | 0.9470 |
|             | Anthem             | 0.9720 | 0.8920 | 0.9630 | 0.9280 | 0.8590 |
|             | ACME               | 0.9680 | 0.9490 | 0.9260 | 0.9370 | 0.8750 |
|             | MixMHCpred-2.0.2   | 0.9610 | 0.9100 | 0.9280 | 0.9190 | 0.8390 |
|             | HLAB               | 0.9391 | 0.8974 | 0.8250 | 0.8608 | 0.7238 |
|             | MHCNetSeq          | 0.8810 | 0.8740 | 0.7970 | 0.8360 | 0.6760 |
| HLA-B*15:01 | Anthem             | 0.9860 | 0.9640 | 0.9430 | 0.9540 | 0.9080 |
|             | NetMHCpan-4.1      | 0.9840 | 0.9600 | 0.9530 | 0.9560 | 0.9130 |
|             | NetMHCcons-1.1     | 0.9830 | 0.9430 | 0.9470 | 0.9450 | 0.8910 |
|             | NetMHCstabpan-1.00 | 0.9820 | 0.9440 | 0.9410 | 0.9430 | 0.8850 |
|             | MixMHCpred-2.0.2   | 0.9810 | 0.9420 | 0.9330 | 0.9380 | 0.8750 |
|             | ACME               | 0.9810 | 0.9560 | 0.9400 | 0.9480 | 0.8960 |
|             | HLAB               | 0.9808 | 0.9670 | 0.9444 | 0.9557 | 0.9116 |
|             | MHCNetSeq          | 0.9700 | 0.9230 | 0.9340 | 0.9280 | 0.8570 |
| HLA-B*18:01 | NetMHCpan-4.1      | 0.9940 | 1.0000 | 0.9640 | 0.9820 | 0.9650 |
|             | NetMHCcons-1.1     | 0.9940 | 0.9810 | 0.9740 | 0.9770 | 0.9550 |
|             | NetMHCstabpan-1.00 | 0.9930 | 0.9900 | 0.9660 | 0.9780 | 0.9570 |
|             | ACME               | 0.9920 | 0.9860 | 0.9590 | 0.9720 | 0.9460 |
|             | HLAB               | 0.9889 | 1.0000 | 0.9070 | 0.9529 | 0.9100 |
|             | Anthem             | 0.9860 | 0.9480 | 0.9570 | 0.9520 | 0.9050 |
|             | MixMHCpred-2.0.2   | 0.9790 | 0.9260 | 0.9330 | 0.9300 | 0.8610 |
|             | MHCNetSeq          | 0.9690 | 0.9330 | 0.9240 | 0.9290 | 0.8580 |
| HLA-B*27:01 | HLAB               | 0.9984 | 1.0000 | 0.9788 | 0.9894 | 0.9790 |
|             | MixMHCpred-2.0.2   | 0.9980 | 0.9920 | 0.9800 | 0.9860 | 0.9720 |
|             | Anthem             | 0.9960 | 0.9950 | 0.9750 | 0.9850 | 0.9700 |
|             | NetMHCpan-4.1      | 0.9950 | 0.9930 | 0.9790 | 0.9860 | 0.9720 |
|             | ACME               | 0.9900 | 0.9770 | 0.9570 | 0.9670 | 0.9340 |
|             | MHCNetSeq          | 0.9900 | 0.9950 | 0.9150 | 0.9550 | 0.9120 |
|             | NetMHCcons-1.1     | 0.9870 | 0.9710 | 0.9440 | 0.9580 | 0.9160 |
|             | NetMHCstabpan-1.00 | 0.9860 | 0.9730 | 0.9410 | 0.9570 | 0.9140 |
| HLA-B*27:02 | HLAB               | 0.9953 | 0.9613 | 0.9945 | 0.9780 | 0.9564 |

|             |                    |        |        |        |        |        |
|-------------|--------------------|--------|--------|--------|--------|--------|
|             | MixMHCpred-2.0.2   | 0.9950 | 0.9720 | 0.9900 | 0.9810 | 0.9630 |
|             | Anthem             | 0.9940 | 0.9620 | 0.9860 | 0.9740 | 0.9490 |
|             | NetMHCpan-4.1      | 0.9930 | 0.9800 | 0.9780 | 0.9790 | 0.9580 |
|             | NetMHCstabpan-1.00 | 0.9900 | 0.9670 | 0.9710 | 0.9690 | 0.9380 |
|             | ACME               | 0.9870 | 0.9720 | 0.9500 | 0.9620 | 0.9230 |
|             | MHCNetSeq          | 0.9870 | 0.9720 | 0.9140 | 0.9430 | 0.8880 |
|             | NetMHCcons-1.1     | 0.9860 | 0.9700 | 0.9550 | 0.9630 | 0.9260 |
| HLA-B*27:03 | MHCNetSeq          | 0.9940 | 0.9740 | 0.9720 | 0.9730 | 0.9470 |
|             | HLAB               | 0.9898 | 0.9574 | 0.9792 | 0.9684 | 0.9370 |
|             | MixMHCpred-2.0.2   | 0.9820 | 0.9570 | 0.9920 | 0.9750 | 0.9490 |
|             | NetMHCpan-4.1      | 0.9820 | 0.9470 | 0.9640 | 0.9550 | 0.9110 |
|             | Anthem             | 0.9770 | 0.9490 | 0.9830 | 0.9660 | 0.9320 |
|             | NetMHCcons-1.1     | 0.9720 | 0.9340 | 0.9640 | 0.9490 | 0.8990 |
|             | NetMHCstabpan-1.00 | 0.9720 | 0.9380 | 0.9640 | 0.9510 | 0.9030 |
|             | ACME               | 0.9710 | 0.9320 | 0.9470 | 0.9400 | 0.8790 |
| HLA-B*27:04 | HLAB               | 0.9962 | 0.9167 | 1.0000 | 0.9587 | 0.9204 |
|             | NetMHCpan-4.1      | 0.9850 | 0.9370 | 0.9670 | 0.9520 | 0.9040 |
|             | ACME               | 0.9830 | 0.9270 | 0.9570 | 0.9420 | 0.8840 |
|             | NetMHCcons-1.1     | 0.9790 | 0.9330 | 0.9750 | 0.9540 | 0.9090 |
|             | NetMHCstabpan-1.00 | 0.9780 | 0.9330 | 0.9770 | 0.9550 | 0.9110 |
|             | Anthem             | 0.9710 | 0.9130 | 0.9680 | 0.9410 | 0.8830 |
|             | MixMHCpred-2.0.2   | 0.9640 | 0.9310 | 0.9800 | 0.9560 | 0.9130 |
|             | MHCNetSeq          | 0.9610 | 0.9330 | 0.9450 | 0.9390 | 0.8790 |
| HLA-B*27:05 | HLAB               | 0.8971 | 0.8041 | 0.8371 | 0.8206 | 0.6415 |
|             | Anthem             | 0.8650 | 0.7250 | 0.8360 | 0.7800 | 0.5650 |
|             | NetMHCcons-1.1     | 0.8160 | 0.6880 | 0.7820 | 0.7350 | 0.4720 |
|             | NetMHCstabpan-1.00 | 0.8160 | 0.6770 | 0.7840 | 0.7310 | 0.4650 |
|             | MixMHCpred-2.0.2   | 0.8140 | 0.6950 | 0.8070 | 0.7510 | 0.5050 |
|             | NetMHCpan-4.1      | 0.8070 | 0.6760 | 0.7960 | 0.7360 | 0.4770 |
|             | ACME               | 0.7910 | 0.6550 | 0.8270 | 0.7410 | 0.4890 |
|             | MHCNetSeq          | 0.7840 | 0.6650 | 0.8070 | 0.7360 | 0.4780 |
| HLA-B*27:06 | MHCNetSeq          | 0.9940 | 0.9800 | 0.9300 | 0.9550 | 0.9120 |
|             | HLAB               | 0.9902 | 0.9600 | 0.9412 | 0.9505 | 0.9012 |
|             | MixMHCpred-2.0.2   | 0.9900 | 0.9640 | 0.9760 | 0.9700 | 0.9400 |
|             | NetMHCpan-4.1      | 0.9850 | 0.9320 | 0.9480 | 0.9400 | 0.8800 |
|             | ACME               | 0.9800 | 0.9300 | 0.9380 | 0.9340 | 0.8690 |
|             | Anthem             | 0.9760 | 0.9320 | 0.9870 | 0.9590 | 0.9210 |
|             | NetMHCcons-1.1     | 0.9690 | 0.9040 | 0.9320 | 0.9180 | 0.8370 |
|             | NetMHCstabpan-1.00 | 0.9690 | 0.9080 | 0.9380 | 0.9230 | 0.8470 |
| HLA-B*27:07 | HLAB               | 0.9989 | 1.0000 | 0.9905 | 0.9952 | 0.9905 |
|             | MixMHCpred-2.0.2   | 0.9980 | 0.9870 | 0.9870 | 0.9880 | 0.9750 |
|             | Anthem             | 0.9960 | 0.9690 | 0.9860 | 0.9780 | 0.9560 |
|             | NetMHCpan-4.1      | 0.9940 | 0.9880 | 0.9770 | 0.9830 | 0.9660 |
|             | MHCNetSeq          | 0.9940 | 1.0000 | 0.9550 | 0.9770 | 0.9560 |

|             |                    |        |        |        |        |        |
|-------------|--------------------|--------|--------|--------|--------|--------|
|             | ACME               | 0.9920 | 0.9860 | 0.9750 | 0.9800 | 0.9610 |
|             | NetMHCstabpan-1.00 | 0.9890 | 0.9820 | 0.9650 | 0.9740 | 0.9480 |
|             | NetMHCcons-1.1     | 0.9870 | 0.9880 | 0.9510 | 0.9700 | 0.9400 |
| HLA-B*27:08 | HLAB               | 0.9993 | 1.0000 | 0.9626 | 0.9812 | 0.9631 |
|             | MixMHCpred-2.0.2   | 0.9990 | 0.9930 | 0.9880 | 0.9900 | 0.9800 |
|             | Anthem             | 0.9950 | 0.9760 | 0.9820 | 0.9790 | 0.9570 |
|             | NetMHCstabpan-1.00 | 0.9950 | 0.9880 | 0.9720 | 0.9800 | 0.9600 |
|             | NetMHCpan-4.1      | 0.9930 | 0.9750 | 0.9670 | 0.9710 | 0.9430 |
|             | NetMHCcons-1.1     | 0.9930 | 0.9780 | 0.9690 | 0.9730 | 0.9470 |
|             | ACME               | 0.9900 | 0.9820 | 0.9590 | 0.9700 | 0.9410 |
| HLA-B*27:09 | Anthem             | 0.9690 | 0.8870 | 0.9400 | 0.9140 | 0.8290 |
|             | NetMHCpan-4.1      | 0.9550 | 0.8870 | 0.9260 | 0.9070 | 0.8150 |
|             | MixMHCpred-2.0.2   | 0.9530 | 0.8710 | 0.9400 | 0.9060 | 0.8140 |
|             | HLAB               | 0.9512 | 0.9682 | 0.9050 | 0.9365 | 0.8748 |
|             | NetMHCcons-1.1     | 0.9480 | 0.8640 | 0.9220 | 0.8930 | 0.7870 |
|             | NetMHCstabpan-1.00 | 0.9480 | 0.8610 | 0.9270 | 0.8940 | 0.7900 |
|             | MHCNetSeq          | 0.9480 | 0.8800 | 0.9180 | 0.8990 | 0.7990 |
|             | ACME               | 0.9400 | 0.8630 | 0.9290 | 0.8950 | 0.7930 |
| HLA-B*35:01 | Anthem             | 0.9690 | 0.9290 | 0.9310 | 0.9300 | 0.8610 |
|             | NetMHCpan-4.1      | 0.9690 | 0.9320 | 0.9560 | 0.9440 | 0.8880 |
|             | NetMHCcons-1.1     | 0.9640 | 0.9220 | 0.9390 | 0.9310 | 0.8610 |
|             | NetMHCstabpan-1.00 | 0.9640 | 0.9170 | 0.9350 | 0.9260 | 0.8520 |
|             | HLAB               | 0.9636 | 0.9355 | 0.9214 | 0.9284 | 0.8570 |
|             | ACME               | 0.9630 | 0.9270 | 0.9400 | 0.9330 | 0.8670 |
|             | MixMHCpred-2.0.2   | 0.9610 | 0.9180 | 0.9250 | 0.9210 | 0.8430 |
|             | MHCNetSeq          | 0.9190 | 0.8160 | 0.8670 | 0.8420 | 0.6850 |
| HLA-B*35:03 | NetMHCpan-4.1      | 0.9970 | 0.9980 | 0.9860 | 0.9920 | 0.9840 |
|             | ACME               | 0.9870 | 0.9610 | 0.9470 | 0.9540 | 0.9090 |
|             | HLAB               | 0.9833 | 0.9592 | 0.9600 | 0.9596 | 0.9192 |
|             | Anthem             | 0.9780 | 0.9220 | 0.9520 | 0.9370 | 0.8750 |
|             | NetMHCcons-1.1     | 0.9770 | 0.9040 | 0.9680 | 0.9360 | 0.8740 |
|             | NetMHCstabpan-1.00 | 0.9740 | 0.9020 | 0.9530 | 0.9280 | 0.8570 |
|             | MixMHCpred-2.0.2   | 0.9670 | 0.9350 | 0.9530 | 0.9440 | 0.8880 |
|             | MHCNetSeq          | 0.9290 | 0.8350 | 0.9200 | 0.8780 | 0.7590 |
| HLA-B*35:08 | HLAB               | 0.9919 | 0.9565 | 1.0000 | 0.9785 | 0.9579 |
|             | NetMHCpan-4.1      | 0.9760 | 0.9570 | 0.9800 | 0.9680 | 0.9370 |
|             | ACME               | 0.9690 | 0.9260 | 0.9630 | 0.9450 | 0.8900 |
|             | Anthem             | 0.9630 | 0.9130 | 0.9490 | 0.9310 | 0.8640 |
|             | NetMHCcons-1.1     | 0.9630 | 0.9170 | 0.9370 | 0.9270 | 0.8550 |
|             | NetMHCstabpan-1.00 | 0.9630 | 0.9130 | 0.9390 | 0.9260 | 0.8530 |
|             | MixMHCpred-2.0.2   | 0.9460 | 0.8720 | 0.9040 | 0.8880 | 0.7770 |
|             | MHCNetSeq          | 0.9390 | 0.8850 | 0.8910 | 0.8880 | 0.7770 |
| HLA-B*37:01 | HLAB               | 0.9983 | 0.9259 | 0.9878 | 0.9571 | 0.9158 |
|             | NetMHCpan-4.1      | 0.9930 | 0.9960 | 0.9790 | 0.9880 | 0.9760 |

|             |                    |        |        |        |        |        |
|-------------|--------------------|--------|--------|--------|--------|--------|
|             | NetMHCcons-1.1     | 0.9900 | 0.9730 | 0.9730 | 0.9730 | 0.9460 |
|             | NetMHCstabpan-1.00 | 0.9890 | 0.9800 | 0.9770 | 0.9780 | 0.9570 |
|             | Anthem             | 0.9860 | 0.9530 | 0.9560 | 0.9550 | 0.9100 |
|             | ACME               | 0.9840 | 0.9620 | 0.9720 | 0.9670 | 0.9330 |
|             | MixMHCpred-2.0.2   | 0.9300 | 0.9060 | 0.8470 | 0.8770 | 0.7550 |
|             | MHCNetSeq          | 0.9230 | 0.8560 | 0.8780 | 0.8670 | 0.7340 |
| HLA-B*39:01 | HLAB               | 0.9998 | 1.0000 | 0.9808 | 0.9903 | 0.9808 |
|             | NetMHCcons-1.1     | 0.9980 | 0.9880 | 0.9710 | 0.9790 | 0.9590 |
|             | NetMHCstabpan-1.00 | 0.9980 | 0.9880 | 0.9760 | 0.9820 | 0.9650 |
|             | Anthem             | 0.9970 | 0.9650 | 0.9740 | 0.9690 | 0.9390 |
|             | MixMHCpred-2.0.2   | 0.9970 | 0.9730 | 0.9860 | 0.9790 | 0.9600 |
|             | NetMHCpan-4.1      | 0.9970 | 0.9820 | 0.9940 | 0.9880 | 0.9770 |
|             | ACME               | 0.9970 | 0.9800 | 0.9740 | 0.9780 | 0.9550 |
|             | MHCNetSeq          | 0.9970 | 0.9800 | 0.9820 | 0.9810 | 0.9630 |
| HLA-B*40:01 | NetMHCcons-1.1     | 0.9950 | 0.9720 | 0.9780 | 0.9750 | 0.9510 |
|             | ACME               | 0.9950 | 0.9880 | 0.9680 | 0.9780 | 0.9560 |
|             | Anthem             | 0.9940 | 0.9590 | 0.9680 | 0.9640 | 0.9270 |
|             | HLAB               | 0.9937 | 0.9690 | 0.9604 | 0.9647 | 0.9294 |
|             | NetMHCpan-4.1      | 0.9930 | 0.9680 | 0.9710 | 0.9690 | 0.9390 |
|             | NetMHCstabpan-1.00 | 0.9920 | 0.9660 | 0.9760 | 0.9710 | 0.9420 |
|             | MixMHCpred-2.0.2   | 0.9850 | 0.9560 | 0.9470 | 0.9510 | 0.9030 |
|             | MHCNetSeq          | 0.9810 | 0.9420 | 0.9630 | 0.9530 | 0.9060 |
| HLA-B*40:02 | MixMHCpred-2.0.2   | 0.9920 | 0.9640 | 0.9630 | 0.9630 | 0.9260 |
|             | Anthem             | 0.9910 | 0.9700 | 0.9670 | 0.9690 | 0.9380 |
|             | NetMHCcons-1.1     | 0.9910 | 0.9700 | 0.9730 | 0.9710 | 0.9430 |
|             | NetMHCpan-4.1      | 0.9900 | 0.9840 | 0.9640 | 0.9740 | 0.9480 |
|             | NetMHCstabpan-1.00 | 0.9890 | 0.9670 | 0.9640 | 0.9660 | 0.9320 |
|             | ACME               | 0.9890 | 0.9670 | 0.9590 | 0.9630 | 0.9260 |
|             | HLAB               | 0.9886 | 0.9780 | 0.9643 | 0.9711 | 0.9423 |
|             | MHCNetSeq          | 0.9680 | 0.9150 | 0.9200 | 0.9170 | 0.8350 |
| HLA-B*41:01 | ACME               | 0.9940 | 0.9630 | 0.9810 | 0.9720 | 0.9450 |
|             | HLAB               | 0.9926 | 0.9375 | 1.0000 | 0.9697 | 0.9410 |
|             | NetMHCpan-4.1      | 0.9900 | 0.9440 | 0.9810 | 0.9630 | 0.9260 |
|             | NetMHCstabpan-1.00 | 0.9830 | 0.9380 | 0.9880 | 0.9630 | 0.9260 |
|             | MixMHCpred-2.0.2   | 0.9820 | 0.9250 | 0.9750 | 0.9500 | 0.9020 |
|             | NetMHCcons-1.1     | 0.9770 | 0.9380 | 0.9810 | 0.9600 | 0.9200 |
|             | MHCNetSeq          | 0.9690 | 0.9500 | 0.9380 | 0.9440 | 0.8890 |
|             | Anthem             | 0.9290 | 0.8620 | 0.9910 | 0.9270 | 0.8610 |
| HLA-B*44:02 | NetMHCpan-4.1      | 0.9930 | 0.9760 | 0.9670 | 0.9710 | 0.9420 |
|             | Anthem             | 0.9880 | 0.9550 | 0.9460 | 0.9500 | 0.9010 |
|             | NetMHCcons-1.1     | 0.9880 | 0.9370 | 0.9570 | 0.9470 | 0.8940 |
|             | ACME               | 0.9850 | 0.9460 | 0.9540 | 0.9500 | 0.9010 |
|             | HLAB               | 0.9848 | 0.9539 | 0.9540 | 0.9539 | 0.9079 |
|             | NetMHCstabpan-1.00 | 0.9840 | 0.9220 | 0.9610 | 0.9420 | 0.8840 |

|             |                    |        |        |        |        |        |
|-------------|--------------------|--------|--------|--------|--------|--------|
|             | MixMHCpred-2.0.2   | 0.9830 | 0.9300 | 0.9320 | 0.9310 | 0.8630 |
|             | MHCNetSeq          | 0.9630 | 0.8990 | 0.9260 | 0.9120 | 0.8250 |
| HLA-B*44:03 | NetMHCpan-4.1      | 0.9940 | 0.9780 | 0.9760 | 0.9770 | 0.9540 |
|             | NetMHCcons-1.1     | 0.9940 | 0.9800 | 0.9700 | 0.9750 | 0.9500 |
|             | ACME               | 0.9940 | 0.9800 | 0.9710 | 0.9760 | 0.9510 |
|             | HLAB               | 0.9922 | 0.9808 | 0.9753 | 0.9781 | 0.9561 |
|             | Anthem             | 0.9910 | 0.9590 | 0.9640 | 0.9610 | 0.9230 |
|             | NetMHCstabpan-1.00 | 0.9910 | 0.9720 | 0.9560 | 0.9640 | 0.9280 |
|             | MixMHCpred-2.0.2   | 0.9900 | 0.9540 | 0.9450 | 0.9500 | 0.9000 |
|             | MHCNetSeq          | 0.9800 | 0.9460 | 0.9600 | 0.9530 | 0.9060 |
| HLA-B*44:27 | HLAB               | 1.0000 | 1.0000 | 1.0000 | 1.0000 | 1.0000 |
|             | MixMHCpred-2.0.2   | 0.9990 | 1.0000 | 0.9930 | 0.9960 | 0.9930 |
|             | NetMHCstabpan-1.00 | 0.9990 | 1.0000 | 0.9930 | 0.9960 | 0.9930 |
|             | NetMHCcons-1.1     | 0.9980 | 0.9930 | 0.9930 | 0.9930 | 0.9860 |
|             | MHCNetSeq          | 0.9980 | 0.9860 | 0.9930 | 0.9890 | 0.9790 |
|             | ACME               | 0.9970 | 0.9860 | 0.9860 | 0.9860 | 0.9720 |
|             | NetMHCpan-4.1      | 0.9920 | 1.0000 | 0.9860 | 0.9930 | 0.9870 |
|             | Anthem             | 0.9780 | 0.8860 | 0.9830 | 0.9350 | 0.8750 |
| HLA-B*45:01 | HLAB               | 0.9803 | 0.9444 | 0.8624 | 0.9032 | 0.8093 |
|             | Anthem             | 0.9710 | 0.9110 | 0.9320 | 0.9210 | 0.8440 |
|             | NetMHCpan-4.1      | 0.9660 | 0.9340 | 0.9500 | 0.9420 | 0.8850 |
|             | NetMHCcons-1.1     | 0.9660 | 0.9090 | 0.9460 | 0.9280 | 0.8570 |
|             | NetMHCstabpan-1.00 | 0.9590 | 0.9110 | 0.9520 | 0.9310 | 0.8640 |
|             | ACME               | 0.9590 | 0.9190 | 0.9350 | 0.9270 | 0.8550 |
|             | MixMHCpred-2.0.2   | 0.9240 | 0.8610 | 0.8350 | 0.8480 | 0.6980 |
|             | MHCNetSeq          | 0.8350 | 0.7410 | 0.8240 | 0.7830 | 0.5690 |
| HLA-B*46:01 | MHCNetSeq          | 0.9780 | 0.9460 | 0.9410 | 0.9430 | 0.8870 |
|             | Anthem             | 0.9710 | 0.9340 | 0.9650 | 0.9500 | 0.9000 |
|             | MixMHCpred-2.0.2   | 0.9660 | 0.9460 | 0.9810 | 0.9630 | 0.9270 |
|             | HLAB               | 0.9578 | 0.7763 | 0.9481 | 0.8627 | 0.7359 |
|             | NetMHCstabpan-1.00 | 0.9460 | 0.9080 | 0.9210 | 0.9140 | 0.8290 |
|             | NetMHCpan-4.1      | 0.9450 | 0.9150 | 0.9180 | 0.9160 | 0.8330 |
|             | NetMHCcons-1.1     | 0.9450 | 0.9030 | 0.9180 | 0.9110 | 0.8220 |
|             | ACME               | 0.9270 | 0.8510 | 0.8640 | 0.8580 | 0.7170 |
| HLA-B*49:01 | NetMHCpan-4.1      | 0.9950 | 0.9950 | 0.9740 | 0.9850 | 0.9690 |
|             | Anthem             | 0.9860 | 0.9390 | 0.9630 | 0.9500 | 0.9020 |
|             | NetMHCcons-1.1     | 0.9840 | 0.9530 | 0.9740 | 0.9640 | 0.9270 |
|             | ACME               | 0.9840 | 0.9630 | 0.9640 | 0.9640 | 0.9270 |
|             | NetMHCstabpan-1.00 | 0.9830 | 0.9530 | 0.9640 | 0.9580 | 0.9170 |
|             | HLAB               | 0.9792 | 0.9813 | 0.9444 | 0.9628 | 0.9262 |
|             | MixMHCpred-2.0.2   | 0.9670 | 0.9060 | 0.9420 | 0.9240 | 0.8490 |
|             | MHCNetSeq          | 0.9420 | 0.9270 | 0.8700 | 0.8990 | 0.7990 |
| HLA-B*50:01 | NetMHCpan-4.1      | 0.9850 | 0.9750 | 0.9470 | 0.9600 | 0.9220 |
|             | NetMHCstabpan-1.00 | 0.9810 | 0.9630 | 0.9580 | 0.9600 | 0.9210 |



|             |                    |        |        |        |        |        |
|-------------|--------------------|--------|--------|--------|--------|--------|
|             | NetMHCcons-1.1     | 0.9800 | 0.9610 | 0.9530 | 0.9570 | 0.9140 |
|             | HLAB               | 0.9797 | 0.9535 | 0.9545 | 0.9540 | 0.9080 |
|             | Anthem             | 0.9750 | 0.8840 | 0.9500 | 0.9170 | 0.8360 |
|             | MixMHCpred-2.0.2   | 0.9700 | 0.9160 | 0.9280 | 0.9220 | 0.8450 |
|             | ACME               | 0.9680 | 0.9440 | 0.9350 | 0.9390 | 0.8790 |
|             | MHCNetSeq          | 0.9560 | 0.9020 | 0.8950 | 0.8990 | 0.7990 |
| HLA-B*51:01 | HLAB               | 0.9683 | 0.9024 | 0.9636 | 0.9331 | 0.8678 |
|             | Anthem             | 0.9380 | 0.8260 | 0.9180 | 0.8720 | 0.7470 |
|             | NetMHCcons-1.1     | 0.8700 | 0.7900 | 0.7540 | 0.7720 | 0.5450 |
|             | NetMHCpan-4.1      | 0.8690 | 0.7790 | 0.7810 | 0.7800 | 0.5630 |
|             | NetMHCstabpan-1.00 | 0.8650 | 0.7860 | 0.7490 | 0.7670 | 0.5360 |
|             | MixMHCpred-2.0.2   | 0.8230 | 0.6850 | 0.8290 | 0.7570 | 0.5190 |
|             | ACME               | 0.7920 | 0.6650 | 0.8100 | 0.7380 | 0.4810 |
|             | MHCNetSeq          | 0.7460 | 0.6850 | 0.7150 | 0.7000 | 0.4020 |
| HLA-B*53:01 | MixMHCpred-2.0.2   | 0.9940 | 1.0000 | 0.9780 | 0.9890 | 0.9780 |
|             | NetMHCcons-1.1     | 0.9860 | 0.9740 | 0.9490 | 0.9620 | 0.9240 |
|             | Anthem             | 0.9830 | 0.8950 | 0.9720 | 0.9340 | 0.8700 |
|             | NetMHCpan-4.1      | 0.9810 | 0.9560 | 0.9390 | 0.9480 | 0.8960 |
|             | NetMHCstabpan-1.00 | 0.9770 | 0.9340 | 0.9290 | 0.9310 | 0.8630 |
|             | HLAB               | 0.9675 | 0.8983 | 0.9667 | 0.9328 | 0.8674 |
|             | ACME               | 0.9610 | 0.9080 | 0.9420 | 0.9260 | 0.8520 |
|             | MHCNetSeq          | 0.7610 | 0.6860 | 0.7320 | 0.7090 | 0.4200 |
| HLA-B*54:01 | HLAB               | 0.9729 | 0.9242 | 0.9552 | 0.9398 | 0.8801 |
|             | ACME               | 0.9560 | 0.9120 | 0.9400 | 0.9260 | 0.8520 |
|             | NetMHCstabpan-1.00 | 0.9470 | 0.9290 | 0.9150 | 0.9220 | 0.8450 |
|             | NetMHCcons-1.1     | 0.9440 | 0.9250 | 0.9200 | 0.9230 | 0.8460 |
|             | Anthem             | 0.9430 | 0.8240 | 0.9540 | 0.8890 | 0.7860 |
|             | NetMHCpan-4.1      | 0.9390 | 0.8880 | 0.9080 | 0.8980 | 0.7960 |
|             | MixMHCpred-2.0.2   | 0.9320 | 0.8650 | 0.9000 | 0.8830 | 0.7660 |
|             | MHCNetSeq          | 0.7350 | 0.7060 | 0.7530 | 0.7300 | 0.4610 |
| HLA-B*56:01 | HLAB               | 1.0000 | 0.8333 | 1.0000 | 0.9178 | 0.8468 |
|             | MixMHCpred-2.0.2   | 0.9990 | 1.0000 | 0.9860 | 0.9930 | 0.9870 |
|             | NetMHCpan-4.1      | 0.9990 | 0.9970 | 0.9920 | 0.9940 | 0.9890 |
|             | NetMHCcons-1.1     | 0.9990 | 1.0000 | 0.9890 | 0.9940 | 0.9890 |
|             | NetMHCstabpan-1.00 | 0.9990 | 1.0000 | 0.9940 | 0.9970 | 0.9950 |
|             | ACME               | 0.9970 | 1.0000 | 0.9860 | 0.9930 | 0.9870 |
|             | Anthem             | 0.9950 | 0.9940 | 0.9790 | 0.9870 | 0.9740 |
|             | MHCNetSeq          | 0.9870 | 0.9690 | 0.9640 | 0.9660 | 0.9330 |
| HLA-B*57:01 | Anthem             | 0.9650 | 0.8810 | 0.9620 | 0.9210 | 0.8460 |
|             | NetMHCcons-1.1     | 0.9630 | 0.8940 | 0.9490 | 0.9220 | 0.8440 |
|             | NetMHCstabpan-1.00 | 0.9630 | 0.8880 | 0.9520 | 0.9200 | 0.8410 |
|             | MixMHCpred-2.0.2   | 0.9590 | 0.8920 | 0.9520 | 0.9220 | 0.8450 |
|             | MHCNetSeq          | 0.9590 | 0.9080 | 0.9380 | 0.9240 | 0.8470 |
|             | NetMHCpan-4.1      | 0.9580 | 0.8930 | 0.9360 | 0.9150 | 0.8300 |

|             |                    |        |        |        |        |        |
|-------------|--------------------|--------|--------|--------|--------|--------|
|             | HLAB               | 0.9578 | 0.9350 | 0.9026 | 0.9188 | 0.8380 |
|             | ACME               | 0.9470 | 0.8870 | 0.9340 | 0.9110 | 0.8220 |
| HLA-B*57:03 | NetMHCpan-4.1      | 0.9840 | 0.9460 | 0.9560 | 0.9510 | 0.9020 |
|             | NetMHCcons-1.1     | 0.9820 | 0.9420 | 0.9660 | 0.9540 | 0.9090 |
|             | NetMHCstabpan-1.00 | 0.9820 | 0.9440 | 0.9660 | 0.9550 | 0.9100 |
|             | Anthem             | 0.9780 | 0.9450 | 0.9710 | 0.9580 | 0.9160 |
|             | MHCNetSeq          | 0.9740 | 0.9270 | 0.9540 | 0.9400 | 0.8810 |
|             | HLAB               | 0.9652 | 0.8848 | 0.9541 | 0.9195 | 0.8411 |
|             | ACME               | 0.9650 | 0.9110 | 0.9330 | 0.9220 | 0.8450 |
| HLA-B*58:01 | NetMHCcons-1.1     | 0.9760 | 0.9440 | 0.9160 | 0.9300 | 0.8610 |
|             | NetMHCpan-4.1      | 0.9710 | 0.9160 | 0.9290 | 0.9230 | 0.8460 |
|             | Anthem             | 0.9700 | 0.9010 | 0.9290 | 0.9150 | 0.8310 |
|             | NetMHCstabpan-1.00 | 0.9650 | 0.8950 | 0.9180 | 0.9060 | 0.8130 |
|             | ACME               | 0.9650 | 0.9010 | 0.9360 | 0.9190 | 0.8380 |
|             | HLAB               | 0.9572 | 0.8990 | 0.9296 | 0.9144 | 0.8291 |
|             | MixMHCpred-2.0.2   | 0.9410 | 0.8690 | 0.9210 | 0.8950 | 0.7910 |
|             | MHCNetSeq          | 0.9090 | 0.8480 | 0.9520 | 0.9000 | 0.8040 |
| HLA-C*01:02 | NetMHCstabpan-1.00 | 0.9820 | 0.9510 | 0.9760 | 0.9640 | 0.9270 |
|             | Anthem             | 0.9780 | 0.9220 | 0.9160 | 0.9190 | 0.8380 |
|             | NetMHCpan-4.1      | 0.9770 | 0.9520 | 0.9540 | 0.9530 | 0.9060 |
|             | NetMHCcons-1.1     | 0.9720 | 0.9470 | 0.9490 | 0.9480 | 0.8960 |
|             | MixMHCpred-2.0.2   | 0.9650 | 0.8970 | 0.9030 | 0.9000 | 0.8010 |
|             | HLAB               | 0.9506 | 0.9634 | 0.8554 | 0.9091 | 0.8232 |
|             | MHCNetSeq          | 0.8440 | 0.7500 | 0.7820 | 0.7660 | 0.5330 |
| HLA-C*02:02 | NetMHCpan-4.1      | 0.9860 | 0.9640 | 0.9530 | 0.9590 | 0.9180 |
|             | Anthem             | 0.9820 | 0.9300 | 0.9320 | 0.9310 | 0.8630 |
|             | NetMHCstabpan-1.00 | 0.9810 | 0.9230 | 0.9430 | 0.9330 | 0.8670 |
|             | NetMHCcons-1.1     | 0.9760 | 0.9220 | 0.9360 | 0.9290 | 0.8590 |
|             | HLAB               | 0.9679 | 0.9268 | 0.9032 | 0.9150 | 0.8302 |
|             | MixMHCpred-2.0.2   | 0.9660 | 0.9110 | 0.9110 | 0.9110 | 0.8220 |
|             | MHCNetSeq          | 0.8640 | 0.7890 | 0.7810 | 0.7850 | 0.5720 |
| HLA-C*03:03 | HLAB               | 0.9435 | 0.9014 | 0.9722 | 0.9371 | 0.8762 |
|             | NetMHCpan-4.1      | 0.9360 | 0.8760 | 0.9750 | 0.9260 | 0.8550 |
|             | Anthem             | 0.9290 | 0.8370 | 0.9380 | 0.8870 | 0.7790 |
|             | MixMHCpred-2.0.2   | 0.9280 | 0.8760 | 0.9180 | 0.8970 | 0.7950 |
|             | NetMHCstabpan-1.00 | 0.9250 | 0.8600 | 0.9450 | 0.9020 | 0.8090 |
|             | NetMHCcons-1.1     | 0.9230 | 0.8670 | 0.9240 | 0.8950 | 0.7940 |
|             | MHCNetSeq          | 0.8770 | 0.8030 | 0.8140 | 0.8090 | 0.6170 |
| HLA-C*03:04 | NetMHCpan-4.1      | 0.9840 | 0.9400 | 0.9430 | 0.9410 | 0.8830 |
|             | NetMHCcons-1.1     | 0.9830 | 0.9440 | 0.9440 | 0.9440 | 0.8880 |
|             | NetMHCstabpan-1.00 | 0.9830 | 0.9420 | 0.9430 | 0.9430 | 0.8860 |
|             | HLAB               | 0.9827 | 0.8902 | 0.9639 | 0.9273 | 0.8567 |
|             | MixMHCpred-2.0.2   | 0.9790 | 0.9470 | 0.9390 | 0.9430 | 0.8870 |
|             | Anthem             | 0.9760 | 0.8970 | 0.9690 | 0.9330 | 0.8690 |

|             |                    |        |        |        |        |        |
|-------------|--------------------|--------|--------|--------|--------|--------|
|             | MHCNetSeq          | 0.8970 | 0.8440 | 0.8020 | 0.8230 | 0.6490 |
| HLA-C*04:01 | HLAB               | 0.9598 | 0.7619 | 0.9914 | 0.8769 | 0.7742 |
|             | Anthem             | 0.9530 | 0.8390 | 0.9420 | 0.8910 | 0.7860 |
|             | NetMHCpan-4.1      | 0.9250 | 0.8660 | 0.9150 | 0.8900 | 0.7820 |
|             | NetMHCcons-1.1     | 0.9160 | 0.8450 | 0.8880 | 0.8660 | 0.7340 |
|             | NetMHCstabpan-1.00 | 0.9160 | 0.8390 | 0.8820 | 0.8600 | 0.7220 |
|             | MixMHCpred-2.0.2   | 0.9110 | 0.8330 | 0.8970 | 0.8650 | 0.7320 |
|             | MHCNetSeq          | 0.6780 | 0.5820 | 0.7100 | 0.6460 | 0.2950 |
| HLA-C*05:01 | HLAB               | 0.9771 | 0.8983 | 0.9832 | 0.9409 | 0.8850 |
|             | Anthem             | 0.9680 | 0.8640 | 0.9560 | 0.9100 | 0.8240 |
|             | NetMHCcons-1.1     | 0.9670 | 0.9360 | 0.9540 | 0.9450 | 0.8890 |
|             | NetMHCpan-4.1      | 0.9660 | 0.9310 | 0.9450 | 0.9380 | 0.8760 |
|             | NetMHCstabpan-1.00 | 0.9650 | 0.9350 | 0.9510 | 0.9430 | 0.8860 |
|             | MixMHCpred-2.0.2   | 0.9600 | 0.9220 | 0.9030 | 0.9130 | 0.8260 |
|             | MHCNetSeq          | 0.8860 | 0.8640 | 0.7530 | 0.8080 | 0.6210 |
| HLA-C*06:02 | HLAB               | 0.9427 | 0.9072 | 0.8878 | 0.8974 | 0.7951 |
|             | Anthem             | 0.9250 | 0.7920 | 0.9250 | 0.8580 | 0.7240 |
|             | NetMHCpan-4.1      | 0.9170 | 0.8330 | 0.9300 | 0.8810 | 0.7670 |
|             | NetMHCstabpan-1.00 | 0.9150 | 0.8310 | 0.8980 | 0.8640 | 0.7320 |
|             | MixMHCpred-2.0.2   | 0.9050 | 0.8330 | 0.8620 | 0.8470 | 0.6960 |
|             | NetMHCcons-1.1     | 0.9050 | 0.8380 | 0.8760 | 0.8570 | 0.7160 |
|             | MHCNetSeq          | 0.7900 | 0.7020 | 0.7760 | 0.7390 | 0.4820 |
| HLA-C*07:01 | NetMHCpan-4.1      | 0.9870 | 0.9540 | 0.9540 | 0.9540 | 0.9080 |
|             | HLAB               | 0.9849 | 0.9750 | 0.9506 | 0.9627 | 0.9258 |
|             | Anthem             | 0.9780 | 0.9000 | 0.9400 | 0.9200 | 0.8410 |
|             | NetMHCstabpan-1.00 | 0.9720 | 0.9140 | 0.9120 | 0.9130 | 0.8270 |
|             | NetMHCcons-1.1     | 0.9600 | 0.9330 | 0.8700 | 0.9010 | 0.8050 |
|             | MixMHCpred-2.0.2   | 0.8720 | 0.8280 | 0.8060 | 0.8170 | 0.6340 |
|             | MHCNetSeq          | 0.8610 | 0.7730 | 0.8300 | 0.8010 | 0.6040 |
| HLA-C*07:02 | NetMHCpan-4.1      | 0.9750 | 0.9200 | 0.9440 | 0.9320 | 0.8650 |
|             | HLAB               | 0.9698 | 0.8909 | 0.9464 | 0.9189 | 0.8390 |
|             | Anthem             | 0.9510 | 0.8580 | 0.9120 | 0.8850 | 0.7730 |
|             | NetMHCstabpan-1.00 | 0.9490 | 0.8840 | 0.9000 | 0.8920 | 0.7840 |
|             | NetMHCcons-1.1     | 0.9460 | 0.9250 | 0.8560 | 0.8910 | 0.7840 |
|             | MixMHCpred-2.0.2   | 0.9160 | 0.8620 | 0.8290 | 0.8450 | 0.6930 |
|             | MHCNetSeq          | 0.8700 | 0.8120 | 0.8130 | 0.8130 | 0.6260 |
| HLA-C*07:04 | NetMHCpan-4.1      | 0.9960 | 1.0000 | 0.9780 | 0.9890 | 0.9790 |
|             | NetMHCstabpan-1.00 | 0.9880 | 0.9850 | 0.9570 | 0.9700 | 0.9410 |
|             | Anthem             | 0.9850 | 0.9320 | 0.9450 | 0.9380 | 0.8770 |
|             | NetMHCcons-1.1     | 0.9710 | 0.9500 | 0.9310 | 0.9410 | 0.8820 |
|             | HLAB               | 0.9583 | 0.9688 | 0.8485 | 0.9077 | 0.8219 |
|             | MHCNetSeq          | 0.5630 | 0.5060 | 0.6880 | 0.5970 | 0.2030 |
| HLA-C*08:02 | NetMHCpan-4.1      | 0.9890 | 0.9870 | 0.9690 | 0.9780 | 0.9560 |
|             | HLAB               | 0.9885 | 0.9732 | 0.9381 | 0.9556 | 0.9117 |

|    |             |                    |        |        |        |        |        |
|----|-------------|--------------------|--------|--------|--------|--------|--------|
|    |             | Anthem             | 0.9870 | 0.9710 | 0.9540 | 0.9630 | 0.9260 |
|    |             | NetMHCstabpan-1.00 | 0.9850 | 0.9430 | 0.9490 | 0.9460 | 0.8920 |
|    |             | NetMHCcons-1.1     | 0.9830 | 0.9400 | 0.9540 | 0.9470 | 0.8950 |
|    |             | MixMHCpred-2.0.2   | 0.9690 | 0.9060 | 0.9270 | 0.9160 | 0.8330 |
|    |             | MHCNetSeq          | 0.9200 | 0.8400 | 0.8700 | 0.8550 | 0.7110 |
|    | HLA-C*14:02 | MixMHCpred-2.0.2   | 0.9970 | 0.9840 | 0.9870 | 0.9860 | 0.9720 |
|    |             | NetMHCpan-4.1      | 0.9970 | 0.9950 | 0.9830 | 0.9890 | 0.9780 |
|    |             | NetMHCcons-1.1     | 0.9950 | 0.9910 | 0.9760 | 0.9840 | 0.9670 |
|    |             | NetMHCstabpan-1.00 | 0.9940 | 0.9860 | 0.9690 | 0.9770 | 0.9550 |
|    |             | Anthem             | 0.9900 | 0.9780 | 0.9770 | 0.9780 | 0.9550 |
|    |             | HLAB               | 0.9899 | 0.9531 | 0.9846 | 0.9690 | 0.9384 |
|    |             | MHCNetSeq          | 0.6690 | 0.6710 | 0.6220 | 0.6460 | 0.2930 |
|    | HLA-C*16:01 | NetMHCpan-4.1      | 0.9740 | 0.9420 | 0.9220 | 0.9320 | 0.8640 |
|    |             | NetMHCcons-1.1     | 0.9710 | 0.9460 | 0.9050 | 0.9250 | 0.8520 |
|    |             | NetMHCstabpan-1.00 | 0.9710 | 0.9570 | 0.8980 | 0.9270 | 0.8560 |
|    |             | Anthem             | 0.9610 | 0.7910 | 0.9370 | 0.8640 | 0.7390 |
|    |             | MixMHCpred-2.0.2   | 0.9530 | 0.8980 | 0.8800 | 0.8890 | 0.7800 |
|    |             | HLAB               | 0.9431 | 0.9348 | 0.8511 | 0.8925 | 0.7880 |
|    |             | MHCNetSeq          | 0.7520 | 0.8220 | 0.6150 | 0.7190 | 0.4530 |
| 11 | HLA-A*01:01 | Anthem             | 0.9920 | 0.9570 | 0.9540 | 0.9550 | 0.9110 |
|    |             | NetMHCpan-4.1      | 0.9920 | 0.9650 | 0.9590 | 0.9620 | 0.9240 |
|    |             | MixMHCpred-2.0.2   | 0.9910 | 0.9540 | 0.9530 | 0.9540 | 0.9070 |
|    |             | HLAB               | 0.9864 | 0.9177 | 0.9655 | 0.9417 | 0.8844 |
|    |             | NetMHCcons-1.1     | 0.9850 | 0.9280 | 0.9450 | 0.9360 | 0.8730 |
|    |             | NetMHCstabpan-1.00 | 0.9840 | 0.9260 | 0.9410 | 0.9340 | 0.8670 |
|    |             | ACME               | 0.9830 | 0.9300 | 0.9440 | 0.9370 | 0.8740 |
|    |             | MHCNetSeq          | 0.9460 | 0.8960 | 0.8720 | 0.8840 | 0.7680 |
|    | HLA-A*02:01 | Anthem             | 0.9500 | 0.8800 | 0.8900 | 0.8850 | 0.7710 |
|    |             | HLAB               | 0.9317 | 0.9044 | 0.8887 | 0.8965 | 0.7931 |
|    |             | MixMHCpred-2.0.2   | 0.9310 | 0.8720 | 0.8600 | 0.8660 | 0.7320 |
|    |             | NetMHCcons-1.1     | 0.9300 | 0.8550 | 0.9210 | 0.8870 | 0.7770 |
|    |             | NetMHCstabpan-1.00 | 0.9270 | 0.8520 | 0.9130 | 0.8820 | 0.7670 |
|    |             | ACME               | 0.9250 | 0.8620 | 0.8820 | 0.8720 | 0.7440 |
|    |             | NetMHCpan-4.1      | 0.9210 | 0.8630 | 0.8900 | 0.8760 | 0.7530 |
|    |             | MHCNetSeq          | 0.8930 | 0.8070 | 0.8390 | 0.8230 | 0.6460 |
|    | HLA-A*02:03 | HLAB               | 0.9288 | 0.8462 | 0.9259 | 0.8868 | 0.7754 |
|    |             | NetMHCpan-4.1      | 0.9210 | 0.8850 | 0.9150 | 0.9000 | 0.8010 |
|    |             | ACME               | 0.9120 | 0.8850 | 0.8850 | 0.8850 | 0.7700 |
|    |             | NetMHCcons-1.1     | 0.9060 | 0.8730 | 0.8310 | 0.8520 | 0.7110 |
|    |             | NetMHCstabpan-1.00 | 0.8700 | 0.7690 | 0.8660 | 0.8170 | 0.6400 |
|    |             | Anthem             | 0.8680 | 0.7850 | 0.9040 | 0.8440 | 0.6960 |
|    |             | MixMHCpred-2.0.2   | 0.8430 | 0.7880 | 0.8430 | 0.8150 | 0.6320 |
|    |             | MHCNetSeq          | 0.8110 | 0.7540 | 0.8460 | 0.8000 | 0.6040 |
|    | HLA-A*02:04 | HLAB               | 0.9891 | 0.9655 | 0.9667 | 0.9661 | 0.9322 |

|             |                    |        |        |        |        |        |
|-------------|--------------------|--------|--------|--------|--------|--------|
|             | MixMHCpred-2.0.2   | 0.9810 | 0.9140 | 0.9660 | 0.9400 | 0.8810 |
|             | ACME               | 0.9650 | 0.9180 | 0.9310 | 0.9240 | 0.8490 |
|             | NetMHCpan-4.1      | 0.9540 | 0.9040 | 0.9250 | 0.9140 | 0.8290 |
|             | NetMHCstabpan-1.00 | 0.9520 | 0.9140 | 0.9420 | 0.9280 | 0.8570 |
|             | MHCNetSeq          | 0.9520 | 0.9110 | 0.9350 | 0.9230 | 0.8460 |
|             | NetMHCcons-1.1     | 0.9500 | 0.9070 | 0.9380 | 0.9230 | 0.8470 |
|             | Anthem             | 0.9300 | 0.7860 | 0.9740 | 0.8800 | 0.7740 |
| HLA-A*02:05 | MHCNetSeq          | 0.9850 | 0.9710 | 0.9230 | 0.9470 | 0.8970 |
|             | NetMHCpan-4.1      | 0.9840 | 0.9760 | 0.9530 | 0.9650 | 0.9320 |
|             | NetMHCcons-1.1     | 0.9840 | 1.0000 | 0.9590 | 0.9790 | 0.9620 |
|             | NetMHCstabpan-1.00 | 0.9830 | 0.9760 | 0.9710 | 0.9740 | 0.9490 |
|             | ACME               | 0.9830 | 0.9820 | 0.9530 | 0.9680 | 0.9370 |
|             | HLAB               | 0.9804 | 0.9412 | 0.9444 | 0.9429 | 0.8856 |
|             | Anthem             | 0.9620 | 0.8940 | 0.9550 | 0.9250 | 0.8530 |
|             | MixMHCpred-2.0.2   | 0.9540 | 0.8820 | 0.9060 | 0.8940 | 0.7900 |
| HLA-A*02:07 | NetMHCpan-4.1      | 0.9600 | 0.9000 | 0.9540 | 0.9270 | 0.8550 |
|             | MixMHCpred-2.0.2   | 0.9580 | 0.9070 | 0.9740 | 0.9400 | 0.8820 |
|             | HLAB               | 0.9564 | 0.8947 | 0.9481 | 0.9216 | 0.8442 |
|             | MHCNetSeq          | 0.9530 | 0.9130 | 0.9140 | 0.9140 | 0.8280 |
|             | Anthem             | 0.9480 | 0.8870 | 0.9710 | 0.9290 | 0.8620 |
|             | NetMHCcons-1.1     | 0.9400 | 0.8960 | 0.9120 | 0.9040 | 0.8080 |
|             | NetMHCstabpan-1.00 | 0.9370 | 0.8910 | 0.9110 | 0.9010 | 0.8020 |
|             | ACME               | 0.9150 | 0.8800 | 0.8650 | 0.8720 | 0.7460 |
| HLA-A*03:01 | NetMHCpan-4.1      | 0.9820 | 0.9590 | 0.9630 | 0.9610 | 0.9210 |
|             | NetMHCcons-1.1     | 0.9780 | 0.9460 | 0.9670 | 0.9570 | 0.9130 |
|             | NetMHCstabpan-1.00 | 0.9770 | 0.9550 | 0.9550 | 0.9550 | 0.9100 |
|             | Anthem             | 0.9760 | 0.9570 | 0.9380 | 0.9470 | 0.8950 |
|             | ACME               | 0.9750 | 0.9430 | 0.9410 | 0.9420 | 0.8840 |
|             | HLAB               | 0.9733 | 0.9455 | 0.9578 | 0.9517 | 0.9034 |
|             | MixMHCpred-2.0.2   | 0.9690 | 0.9280 | 0.9320 | 0.9300 | 0.8610 |
|             | MHCNetSeq          | 0.9260 | 0.8480 | 0.9190 | 0.8840 | 0.7700 |
| HLA-A*11:01 | HLAB               | 0.9800 | 0.9571 | 0.9786 | 0.9679 | 0.9360 |
|             | NetMHCpan-4.1      | 0.9780 | 0.9550 | 0.9630 | 0.9590 | 0.9180 |
|             | NetMHCcons-1.1     | 0.9760 | 0.9480 | 0.9680 | 0.9580 | 0.9170 |
|             | NetMHCstabpan-1.00 | 0.9760 | 0.9450 | 0.9700 | 0.9580 | 0.9160 |
|             | Anthem             | 0.9750 | 0.9500 | 0.9550 | 0.9520 | 0.9050 |
|             | MixMHCpred-2.0.2   | 0.9730 | 0.9340 | 0.9420 | 0.9380 | 0.8770 |
|             | ACME               | 0.9730 | 0.9550 | 0.9570 | 0.9560 | 0.9130 |
|             | MHCNetSeq          | 0.9590 | 0.9140 | 0.9280 | 0.9210 | 0.8430 |
| HLA-A*23:01 | HLAB               | 1.0000 | 1.0000 | 1.0000 | 1.0000 | 1.0000 |
|             | MixMHCpred-2.0.2   | 0.9990 | 0.9850 | 1.0000 | 0.9920 | 0.9850 |
|             | NetMHCpan-4.1      | 0.9990 | 1.0000 | 0.9960 | 0.9980 | 0.9960 |
|             | ACME               | 0.9990 | 1.0000 | 0.9890 | 0.9940 | 0.9890 |
|             | NetMHCcons-1.1     | 0.9970 | 0.9850 | 0.9810 | 0.9830 | 0.9660 |

|             |                         |        |        |        |        |
|-------------|-------------------------|--------|--------|--------|--------|
|             | NetMHCstabpan-1.00.9970 | 1.0000 | 0.9730 | 0.9870 | 0.9740 |
|             | Anthem                  | 0.9910 | 0.9540 | 0.9910 | 0.9720 |
|             | MHCNetSeq               | 0.9910 | 0.9540 | 0.9730 | 0.9640 |
| HLA-A*24:02 | HLAB                    | 0.9947 | 0.9677 | 0.9733 | 0.9705 |
|             | Anthem                  | 0.9900 | 0.9380 | 0.9620 | 0.9500 |
|             | NetMHCpan-4.1           | 0.9900 | 0.9700 | 0.9550 | 0.9630 |
|             | NetMHCstabpan-1.00.9900 | 0.9710 | 0.9560 | 0.9640 | 0.9280 |
|             | NetMHCcons-1.1          | 0.9890 | 0.9740 | 0.9530 | 0.9640 |
|             | MixMHCpred-2.0.2        | 0.9850 | 0.9490 | 0.9320 | 0.9400 |
|             | ACME                    | 0.9850 | 0.9450 | 0.9600 | 0.9530 |
|             | MHCNetSeq               | 0.9550 | 0.8930 | 0.9000 | 0.8970 |
| HLA-A*24:06 | HLAB                    | 0.9395 | 0.8421 | 0.9500 | 0.8974 |
|             | NetMHCpan-4.1           | 0.9380 | 0.8900 | 0.9530 | 0.9210 |
|             | MixMHCpred-2.0.2        | 0.9360 | 0.8950 | 0.9730 | 0.9340 |
|             | NetMHCstabpan-1.00.9330 | 0.8790 | 0.9160 | 0.8970 | 0.7970 |
|             | NetMHCcons-1.1          | 0.9320 | 0.8630 | 0.9370 | 0.9000 |
|             | Anthem                  | 0.9180 | 0.8100 | 0.9430 | 0.8770 |
|             | MHCNetSeq               | 0.9120 | 0.8950 | 0.8530 | 0.8740 |
| HLA-A*29:02 | HLAB                    | 0.9823 | 0.9574 | 0.9579 | 0.9577 |
|             | MixMHCpred-2.0.2        | 0.9790 | 0.9400 | 0.9780 | 0.9590 |
|             | Anthem                  | 0.9730 | 0.9190 | 0.9580 | 0.9390 |
|             | NetMHCcons-1.1          | 0.9730 | 0.9390 | 0.9600 | 0.9500 |
|             | NetMHCpan-4.1           | 0.9720 | 0.9460 | 0.9550 | 0.9500 |
|             | NetMHCstabpan-1.00.9700 | 0.9350 | 0.9550 | 0.9450 | 0.8910 |
|             | ACME                    | 0.9680 | 0.9420 | 0.9470 | 0.9440 |
|             | MHCNetSeq               | 0.9450 | 0.8940 | 0.8900 | 0.8920 |
| HLA-A*31:01 | MixMHCpred-2.0.2        | 0.9860 | 0.9500 | 0.9480 | 0.9490 |
|             | Anthem                  | 0.9840 | 0.9670 | 0.9140 | 0.9400 |
|             | NetMHCstabpan-1.00.9810 | 0.9580 | 0.9260 | 0.9420 | 0.8840 |
|             | NetMHCcons-1.1          | 0.9780 | 0.9410 | 0.9410 | 0.9410 |
|             | NetMHCpan-4.1           | 0.9740 | 0.9380 | 0.9320 | 0.9350 |
|             | ACME                    | 0.9670 | 0.9110 | 0.9320 | 0.9210 |
|             | HLAB                    | 0.9664 | 0.9545 | 0.8955 | 0.9248 |
|             | MHCNetSeq               | 0.9310 | 0.8580 | 0.8860 | 0.8720 |
| HLA-A*32:01 | NetMHCstabpan-1.00.9890 | 0.9600 | 0.9680 | 0.9640 | 0.9280 |
|             | NetMHCcons-1.1          | 0.9870 | 0.9620 | 0.9540 | 0.9580 |
|             | MixMHCpred-2.0.2        | 0.9850 | 0.9320 | 0.9780 | 0.9550 |
|             | NetMHCpan-4.1           | 0.9820 | 0.9380 | 0.9740 | 0.9560 |
|             | ACME                    | 0.9760 | 0.9440 | 0.9640 | 0.9540 |
|             | HLAB                    | 0.9745 | 0.9200 | 0.9804 | 0.9505 |
|             | Anthem                  | 0.9530 | 0.8640 | 0.9700 | 0.9170 |
|             | MHCNetSeq               | 0.9500 | 0.9080 | 0.9260 | 0.9170 |
| HLA-A*68:01 | NetMHCstabpan-1.00.9990 | 0.9980 | 0.9890 | 0.9930 | 0.9870 |
|             | HLAB                    | 0.9987 | 1.0000 | 0.9455 | 0.9725 |

|             |                    |        |        |        |        |        |
|-------------|--------------------|--------|--------|--------|--------|--------|
|             | NetMHCpan-4.1      | 0.9980 | 0.9960 | 0.9940 | 0.9950 | 0.9910 |
|             | NetMHCcons-1.1     | 0.9980 | 0.9920 | 0.9890 | 0.9910 | 0.9820 |
|             | ACME               | 0.9960 | 0.9940 | 0.9780 | 0.9860 | 0.9730 |
|             | Anthem             | 0.9950 | 0.9850 | 0.9740 | 0.9800 | 0.9600 |
|             | MixMHCpred-2.0.2   | 0.9940 | 0.9910 | 0.9540 | 0.9720 | 0.9460 |
|             | MHCNetSeq          | 0.9130 | 0.8670 | 0.8280 | 0.8470 | 0.6950 |
| HLA-A*68:02 | HLAB               | 0.9274 | 0.8714 | 0.8592 | 0.8652 | 0.7306 |
|             | Anthem             | 0.8890 | 0.8000 | 0.8290 | 0.8150 | 0.6300 |
|             | MHCNetSeq          | 0.8800 | 0.8070 | 0.7800 | 0.7940 | 0.5910 |
|             | MixMHCpred-2.0.2   | 0.8720 | 0.7400 | 0.8860 | 0.8130 | 0.6340 |
|             | NetMHCstabpan-1.00 | 0.8510 | 0.7560 | 0.8690 | 0.8120 | 0.6300 |
|             | NetMHCcons-1.1     | 0.8390 | 0.7420 | 0.8670 | 0.8040 | 0.6140 |
|             | ACME               | 0.8290 | 0.7200 | 0.8600 | 0.7900 | 0.5880 |
|             | NetMHCpan-4.1      | 0.8220 | 0.7220 | 0.8640 | 0.7930 | 0.5930 |
| HLA-B*07:02 | NetMHCpan-4.1      | 0.9840 | 0.9540 | 0.9520 | 0.9530 | 0.9060 |
|             | NetMHCcons-1.1     | 0.9840 | 0.9580 | 0.9620 | 0.9590 | 0.9190 |
|             | NetMHCstabpan-1.00 | 0.9840 | 0.9540 | 0.9600 | 0.9570 | 0.9140 |
|             | HLAB               | 0.9830 | 0.9375 | 0.9707 | 0.9541 | 0.9087 |
|             | MixMHCpred-2.0.2   | 0.9820 | 0.9490 | 0.9460 | 0.9470 | 0.8940 |
|             | ACME               | 0.9820 | 0.9650 | 0.9510 | 0.9580 | 0.9160 |
|             | Anthem             | 0.9810 | 0.9510 | 0.9550 | 0.9530 | 0.9070 |
|             | MHCNetSeq          | 0.9530 | 0.8740 | 0.8980 | 0.8860 | 0.7730 |
| HLA-B*08:01 | NetMHCcons-1.1     | 0.9880 | 0.9610 | 0.9670 | 0.9640 | 0.9270 |
|             | NetMHCstabpan-1.00 | 0.9880 | 0.9610 | 0.9670 | 0.9640 | 0.9280 |
|             | NetMHCpan-4.1      | 0.9810 | 0.9510 | 0.9550 | 0.9530 | 0.9070 |
|             | ACME               | 0.9730 | 0.9150 | 0.9300 | 0.9230 | 0.8460 |
|             | HLAB               | 0.9608 | 0.9697 | 0.8824 | 0.9254 | 0.8543 |
|             | Anthem             | 0.9520 | 0.7820 | 0.9420 | 0.8620 | 0.7360 |
|             | MixMHCpred-2.0.2   | 0.9360 | 0.8820 | 0.8730 | 0.8770 | 0.7570 |
|             | MHCNetSeq          | 0.7270 | 0.7510 | 0.6700 | 0.7110 | 0.4250 |
| HLA-B*15:01 | Anthem             | 0.9730 | 0.9390 | 0.9610 | 0.9500 | 0.9000 |
|             | NetMHCpan-4.1      | 0.9730 | 0.9500 | 0.9600 | 0.9550 | 0.9100 |
|             | NetMHCstabpan-1.00 | 0.9730 | 0.9410 | 0.9590 | 0.9500 | 0.9000 |
|             | ACME               | 0.9720 | 0.9400 | 0.9600 | 0.9500 | 0.9010 |
|             | NetMHCcons-1.1     | 0.9710 | 0.9320 | 0.9660 | 0.9490 | 0.8980 |
|             | MixMHCpred-2.0.2   | 0.9680 | 0.9280 | 0.9630 | 0.9460 | 0.8920 |
|             | HLAB               | 0.9560 | 0.8341 | 0.8973 | 0.8658 | 0.7329 |
|             | MHCNetSeq          | 0.9160 | 0.9870 | 0.3510 | 0.6690 | 0.4370 |
| HLA-B*27:01 | HLAB               | 0.9987 | 0.9727 | 1.0000 | 0.9864 | 0.9732 |
|             | MixMHCpred-2.0.2   | 0.9980 | 0.9810 | 0.9870 | 0.9840 | 0.9690 |
|             | NetMHCpan-4.1      | 0.9950 | 0.9830 | 0.9780 | 0.9800 | 0.9610 |
|             | Anthem             | 0.9930 | 0.9620 | 0.9890 | 0.9750 | 0.9510 |
|             | ACME               | 0.9870 | 0.9780 | 0.9500 | 0.9640 | 0.9290 |
|             | NetMHCcons-1.1     | 0.9830 | 0.9420 | 0.9530 | 0.9470 | 0.8950 |

|             |                    |        |        |        |        |        |
|-------------|--------------------|--------|--------|--------|--------|--------|
|             | NetMHCstabpan-1.00 | 0.9810 | 0.9490 | 0.9420 | 0.9450 | 0.8910 |
|             | MHCNetSeq          | 0.9010 | 1.0000 | 0.2110 | 0.6060 | 0.3410 |
| HLA-B*27:02 | HLAB               | 0.9997 | 1.0000 | 0.9831 | 0.9915 | 0.9831 |
|             | MixMHCpred-2.0.2   | 0.9990 | 1.0000 | 0.9910 | 0.9950 | 0.9910 |
|             | Anthem             | 0.9980 | 0.9810 | 0.9850 | 0.9830 | 0.9660 |
|             | NetMHCstabpan-1.00 | 0.9970 | 0.9710 | 0.9790 | 0.9750 | 0.9510 |
|             | NetMHCpan-4.1      | 0.9940 | 0.9850 | 0.9760 | 0.9800 | 0.9610 |
|             | NetMHCcons-1.1     | 0.9940 | 0.9720 | 0.9790 | 0.9760 | 0.9510 |
|             | ACME               | 0.9870 | 0.9650 | 0.9680 | 0.9670 | 0.9340 |
|             | MHCNetSeq          | 0.9660 | 1.0000 | 0.2970 | 0.6490 | 0.4170 |
| HLA-B*27:03 | HLAB               | 1.0000 | 1.0000 | 1.0000 | 1.0000 | 1.0000 |
|             | MixMHCpred-2.0.2   | 0.9990 | 0.9760 | 1.0000 | 0.9870 | 0.9760 |
|             | NetMHCpan-4.1      | 0.9970 | 0.9780 | 0.9870 | 0.9820 | 0.9650 |
|             | NetMHCcons-1.1     | 0.9970 | 0.9870 | 0.9890 | 0.9880 | 0.9760 |
|             | NetMHCstabpan-1.00 | 0.9970 | 0.9840 | 0.9890 | 0.9860 | 0.9730 |
|             | Anthem             | 0.9940 | 0.9730 | 0.9810 | 0.9770 | 0.9540 |
|             | ACME               | 0.9920 | 0.9730 | 0.9650 | 0.9690 | 0.9380 |
|             | MHCNetSeq          | 0.9890 | 1.0000 | 0.6900 | 0.8440 | 0.7260 |
| HLA-B*27:04 | HLAB               | 0.9872 | 0.9615 | 0.9630 | 0.9623 | 0.9245 |
|             | NetMHCcons-1.1     | 0.9820 | 0.9620 | 0.9920 | 0.9770 | 0.9540 |
|             | NetMHCstabpan-1.00 | 0.9820 | 0.9620 | 0.9960 | 0.9790 | 0.9580 |
|             | NetMHCpan-4.1      | 0.9810 | 0.9620 | 0.9890 | 0.9750 | 0.9500 |
|             | ACME               | 0.9770 | 0.9540 | 0.9890 | 0.9720 | 0.9430 |
|             | Anthem             | 0.9740 | 0.9540 | 0.9780 | 0.9660 | 0.9320 |
|             | MHCNetSeq          | 0.9730 | 1.0000 | 0.4190 | 0.7100 | 0.5150 |
|             | MixMHCpred-2.0.2   | 0.9670 | 0.9620 | 1.0000 | 0.9810 | 0.9620 |
| HLA-B*27:05 | HLAB               | 0.8716 | 0.7705 | 0.8479 | 0.8092 | 0.6203 |
|             | Anthem             | 0.8270 | 0.6420 | 0.8380 | 0.7400 | 0.4900 |
|             | MixMHCpred-2.0.2   | 0.7730 | 0.6890 | 0.7090 | 0.6990 | 0.3980 |
|             | NetMHCstabpan-1.00 | 0.7400 | 0.6190 | 0.7620 | 0.6900 | 0.3850 |
|             | MHCNetSeq          | 0.7350 | 0.8850 | 0.2990 | 0.5920 | 0.2280 |
|             | NetMHCcons-1.1     | 0.7310 | 0.6110 | 0.7450 | 0.6780 | 0.3600 |
|             | ACME               | 0.7190 | 0.5960 | 0.7360 | 0.6660 | 0.3360 |
|             | NetMHCpan-4.1      | 0.7120 | 0.5960 | 0.7450 | 0.6700 | 0.3440 |
| HLA-B*27:06 | MixMHCpred-2.0.2   | 1.0000 | 1.0000 | 1.0000 | 1.0000 | 1.0000 |
|             | Anthem             | 0.9970 | 1.0000 | 0.9770 | 0.9880 | 0.9780 |
|             | ACME               | 0.9960 | 0.9920 | 0.9800 | 0.9860 | 0.9720 |
|             | NetMHCpan-4.1      | 0.9950 | 0.9880 | 0.9640 | 0.9760 | 0.9530 |
|             | NetMHCstabpan-1.00 | 0.9930 | 0.9760 | 0.9760 | 0.9760 | 0.9530 |
|             | NetMHCcons-1.1     | 0.9920 | 0.9720 | 0.9760 | 0.9740 | 0.9490 |
|             | HLAB               | 0.9862 | 1.0000 | 0.9231 | 0.9608 | 0.9245 |
|             | MHCNetSeq          | 0.9770 | 1.0000 | 0.4520 | 0.7260 | 0.5400 |
| HLA-B*27:07 | HLAB               | 1.0000 | 1.0000 | 1.0000 | 1.0000 | 1.0000 |
|             | MixMHCpred-2.0.2   | 0.9990 | 1.0000 | 0.9970 | 0.9980 | 0.9970 |



|             |                    |        |        |        |        |        |
|-------------|--------------------|--------|--------|--------|--------|--------|
|             | NetMHCpan-4.1      | 0.9960 | 0.9980 | 0.9820 | 0.9900 | 0.9800 |
|             | Anthem             | 0.9930 | 0.9870 | 0.9800 | 0.9830 | 0.9670 |
|             | ACME               | 0.9920 | 0.9880 | 0.9650 | 0.9770 | 0.9540 |
|             | NetMHCstabpan-1.00 | 0.9910 | 0.9810 | 0.9680 | 0.9750 | 0.9500 |
|             | NetMHCcons-1.1     | 0.9890 | 0.9850 | 0.9600 | 0.9720 | 0.9460 |
|             | MHCNetSeq          | 0.9870 | 1.0000 | 0.2950 | 0.6480 | 0.4160 |
| HLA-B*27:08 | HLAB               | 0.9991 | 0.9865 | 0.9733 | 0.9799 | 0.9598 |
|             | MixMHCpred-2.0.2   | 0.9950 | 0.9850 | 0.9860 | 0.9860 | 0.9720 |
|             | Anthem             | 0.9890 | 0.9860 | 0.9740 | 0.9800 | 0.9610 |
|             | NetMHCstabpan-1.00 | 0.9890 | 0.9690 | 0.9620 | 0.9650 | 0.9310 |
|             | NetMHCcons-1.1     | 0.9880 | 0.9690 | 0.9570 | 0.9630 | 0.9260 |
|             | NetMHCpan-4.1      | 0.9870 | 0.9740 | 0.9610 | 0.9680 | 0.9350 |
|             | ACME               | 0.9770 | 0.9780 | 0.9510 | 0.9650 | 0.9300 |
| HLA-B*27:09 | HLAB               | 0.9715 | 0.9362 | 0.9507 | 0.9435 | 0.8870 |
|             | Anthem             | 0.9530 | 0.8720 | 0.9380 | 0.9050 | 0.8130 |
|             | NetMHCpan-4.1      | 0.9470 | 0.8890 | 0.9190 | 0.9040 | 0.8090 |
|             | MixMHCpred-2.0.2   | 0.9440 | 0.9040 | 0.9230 | 0.9130 | 0.8280 |
|             | NetMHCcons-1.1     | 0.9370 | 0.8660 | 0.9370 | 0.9010 | 0.8050 |
|             | NetMHCstabpan-1.00 | 0.9370 | 0.8660 | 0.9500 | 0.9080 | 0.8200 |
|             | ACME               | 0.9300 | 0.8620 | 0.9230 | 0.8930 | 0.7870 |
|             | MHCNetSeq          | 0.9280 | 0.9790 | 0.2860 | 0.6320 | 0.3660 |
| HLA-B*35:01 | Anthem             | 0.9560 | 0.8510 | 0.9390 | 0.8950 | 0.7940 |
|             | HLAB               | 0.9465 | 0.8605 | 0.9154 | 0.8880 | 0.7771 |
|             | NetMHCpan-4.1      | 0.9400 | 0.8710 | 0.9260 | 0.8980 | 0.7970 |
|             | MixMHCpred-2.0.2   | 0.9370 | 0.8620 | 0.9480 | 0.9050 | 0.8130 |
|             | ACME               | 0.9300 | 0.8610 | 0.9290 | 0.8950 | 0.7930 |
|             | NetMHCstabpan-1.00 | 0.9250 | 0.8730 | 0.9420 | 0.9070 | 0.8170 |
|             | NetMHCcons-1.1     | 0.9240 | 0.8750 | 0.9380 | 0.9070 | 0.8150 |
|             | MHCNetSeq          | 0.8190 | 0.6910 | 0.8060 | 0.7480 | 0.5000 |
| HLA-B*35:03 | HLAB               | 1.0000 | 1.0000 | 1.0000 | 1.0000 | 1.0000 |
|             | NetMHCpan-4.1      | 0.9980 | 1.0000 | 0.9970 | 0.9980 | 0.9970 |
|             | ACME               | 0.9960 | 0.9860 | 0.9760 | 0.9810 | 0.9620 |
|             | Anthem             | 0.9850 | 0.9310 | 0.9800 | 0.9560 | 0.9130 |
|             | NetMHCcons-1.1     | 0.9850 | 0.9380 | 0.9560 | 0.9460 | 0.8930 |
|             | MixMHCpred-2.0.2   | 0.9820 | 0.9350 | 0.9660 | 0.9500 | 0.9010 |
|             | NetMHCstabpan-1.00 | 0.9820 | 0.9280 | 0.9480 | 0.9380 | 0.8760 |
|             | MHCNetSeq          | 0.8610 | 0.9000 | 0.7520 | 0.8260 | 0.6610 |
| HLA-B*35:08 | HLAB               | 0.9881 | 0.9630 | 1.0000 | 0.9818 | 0.9642 |
|             | MixMHCpred-2.0.2   | 0.9750 | 0.9330 | 0.9300 | 0.9310 | 0.8640 |
|             | Anthem             | 0.9640 | 0.9410 | 0.9330 | 0.9370 | 0.8750 |
|             | NetMHCpan-4.1      | 0.9490 | 0.9260 | 0.9960 | 0.9610 | 0.9240 |
|             | NetMHCcons-1.1     | 0.9460 | 0.8890 | 0.9670 | 0.9280 | 0.8580 |
|             | NetMHCstabpan-1.00 | 0.9450 | 0.8890 | 0.9630 | 0.9260 | 0.8540 |
|             | ACME               | 0.9430 | 0.9080 | 0.9480 | 0.9280 | 0.8570 |

|             |                    |        |        |        |        |        |
|-------------|--------------------|--------|--------|--------|--------|--------|
|             | MHCNetSeq          | 0.9320 | 1.0000 | 0.7710 | 0.8850 | 0.7920 |
| HLA-B*37:01 | NetMHCpan-4.1      | 0.9880 | 0.9930 | 0.9790 | 0.9860 | 0.9730 |
|             | HLAB               | 0.9857 | 0.9286 | 1.0000 | 0.9655 | 0.9330 |
|             | NetMHCstabpan-1.00 | 0.9830 | 0.9930 | 0.9360 | 0.9640 | 0.9320 |
|             | NetMHCcons-1.1     | 0.9800 | 0.9860 | 0.9360 | 0.9610 | 0.9240 |
|             | ACME               | 0.9680 | 0.9290 | 0.9720 | 0.9500 | 0.9020 |
|             | Anthem             | 0.9540 | 0.8290 | 0.9540 | 0.8910 | 0.7940 |
|             | MixMHCpred-2.0.2   | 0.9540 | 0.9360 | 0.9220 | 0.9290 | 0.8600 |
|             | MHCNetSeq          | 0.9020 | 0.9430 | 0.5720 | 0.7570 | 0.5540 |
| HLA-B*39:01 | HLAB               | 0.9992 | 1.0000 | 0.9714 | 0.9855 | 0.9714 |
|             | NetMHCcons-1.1     | 0.9990 | 1.0000 | 0.9940 | 0.9970 | 0.9940 |
|             | NetMHCstabpan-1.00 | 0.9990 | 1.0000 | 0.9940 | 0.9970 | 0.9940 |
|             | NetMHCpan-4.1      | 0.9970 | 0.9910 | 0.9910 | 0.9910 | 0.9820 |
|             | ACME               | 0.9970 | 1.0000 | 0.9880 | 0.9940 | 0.9880 |
|             | MixMHCpred-2.0.2   | 0.9940 | 0.9650 | 0.9770 | 0.9700 | 0.9430 |
|             | Anthem             | 0.9930 | 0.9350 | 0.9910 | 0.9630 | 0.9280 |
|             | MHCNetSeq          | 0.9920 | 1.0000 | 0.9180 | 0.9590 | 0.9220 |
| HLA-B*40:01 | Anthem             | 0.9960 | 0.9530 | 0.9900 | 0.9720 | 0.9440 |
|             | NetMHCcons-1.1     | 0.9960 | 0.9760 | 0.9810 | 0.9780 | 0.9570 |
|             | NetMHCstabpan-1.00 | 0.9960 | 0.9760 | 0.9830 | 0.9790 | 0.9590 |
|             | ACME               | 0.9960 | 0.9750 | 0.9860 | 0.9800 | 0.9600 |
|             | NetMHCpan-4.1      | 0.9950 | 0.9810 | 0.9750 | 0.9780 | 0.9560 |
|             | HLAB               | 0.9921 | 0.9909 | 0.9820 | 0.9864 | 0.9729 |
|             | MixMHCpred-2.0.2   | 0.9920 | 0.9570 | 0.9650 | 0.9600 | 0.9210 |
|             | MHCNetSeq          | 0.9850 | 0.9360 | 0.9440 | 0.9400 | 0.8810 |
| HLA-B*40:02 | MixMHCpred-2.0.2   | 0.9960 | 0.9690 | 0.9800 | 0.9750 | 0.9500 |
|             | Anthem             | 0.9930 | 0.9600 | 0.9740 | 0.9670 | 0.9340 |
|             | HLAB               | 0.9926 | 0.9862 | 0.9726 | 0.9794 | 0.9589 |
|             | NetMHCpan-4.1      | 0.9900 | 0.9830 | 0.9720 | 0.9770 | 0.9550 |
|             | ACME               | 0.9870 | 0.9740 | 0.9660 | 0.9700 | 0.9400 |
|             | NetMHCstabpan-1.00 | 0.9860 | 0.9720 | 0.9720 | 0.9720 | 0.9450 |
|             | NetMHCcons-1.1     | 0.9840 | 0.9690 | 0.9640 | 0.9660 | 0.9330 |
|             | MHCNetSeq          | 0.9800 | 0.9860 | 0.8180 | 0.9020 | 0.8160 |
| HLA-B*44:02 | NetMHCpan-4.1      | 0.9900 | 0.9530 | 0.9690 | 0.9610 | 0.9220 |
|             | ACME               | 0.9880 | 0.9610 | 0.9530 | 0.9570 | 0.9140 |
|             | HLAB               | 0.9870 | 0.9626 | 0.9734 | 0.9680 | 0.9361 |
|             | NetMHCstabpan-1.00 | 0.9840 | 0.9510 | 0.9740 | 0.9630 | 0.9260 |
|             | Anthem             | 0.9830 | 0.9500 | 0.9630 | 0.9570 | 0.9130 |
|             | NetMHCcons-1.1     | 0.9830 | 0.9520 | 0.9710 | 0.9610 | 0.9220 |
|             | MixMHCpred-2.0.2   | 0.9820 | 0.9420 | 0.9680 | 0.9550 | 0.9100 |
|             | MHCNetSeq          | 0.9770 | 0.9630 | 0.8260 | 0.8940 | 0.7960 |
| HLA-B*44:03 | HLAB               | 0.9975 | 0.9728 | 0.9932 | 0.9831 | 0.9663 |
|             | NetMHCcons-1.1     | 0.9960 | 0.9820 | 0.9860 | 0.9840 | 0.9680 |
|             | NetMHCpan-4.1      | 0.9950 | 0.9840 | 0.9860 | 0.9850 | 0.9700 |

|             |                         |        |        |        |        |
|-------------|-------------------------|--------|--------|--------|--------|
|             | NetMHCstabpan-1.00.9950 | 0.9800 | 0.9830 | 0.9810 | 0.9630 |
|             | ACME                    | 0.9950 | 0.9830 | 0.9800 | 0.9820 |
|             | MixMHCpred-2.0.2        | 0.9940 | 0.9770 | 0.9770 | 0.9770 |
|             | MHCNetSeq               | 0.9900 | 0.9730 | 0.8820 | 0.9270 |
|             | Anthem                  | 0.9890 | 0.9580 | 0.9880 | 0.9730 |
| HLA-B*45:01 | NetMHCpan-4.1           | 0.9840 | 0.9580 | 0.9740 | 0.9660 |
|             | HLAB                    | 0.9788 | 0.9677 | 0.9688 | 0.9683 |
|             | NetMHCcons-1.1          | 0.9770 | 0.9250 | 0.9480 | 0.9370 |
|             | ACME                    | 0.9770 | 0.9320 | 0.9580 | 0.9450 |
|             | MixMHCpred-2.0.2        | 0.9740 | 0.9350 | 0.8970 | 0.9160 |
|             | NetMHCstabpan-1.00.9710 | 0.9710 | 0.9250 | 0.9480 | 0.9370 |
|             | Anthem                  | 0.9460 | 0.8580 | 0.9670 | 0.9120 |
|             | MHCNetSeq               | 0.8910 | 0.8930 | 0.7390 | 0.8160 |
| HLA-B*46:01 | HLAB                    | 0.9532 | 0.8889 | 0.9474 | 0.9189 |
|             | Anthem                  | 0.9090 | 0.6450 | 0.9500 | 0.7970 |
|             | MixMHCpred-2.0.2        | 0.9050 | 0.8330 | 0.9000 | 0.8670 |
|             | MHCNetSeq               | 0.8890 | 1.0000 | 0.4280 | 0.7140 |
|             | ACME                    | 0.8640 | 0.7670 | 0.8940 | 0.8310 |
|             | NetMHCstabpan-1.00.8520 | 0.8520 | 0.8000 | 0.8940 | 0.8470 |
|             | NetMHCpan-4.1           | 0.8480 | 0.8000 | 0.8890 | 0.8450 |
|             | NetMHCcons-1.1          | 0.8380 | 0.7890 | 0.9390 | 0.8640 |
| HLA-B*49:01 | HLAB                    | 1.0000 | 1.0000 | 1.0000 | 1.0000 |
|             | NetMHCpan-4.1           | 0.9920 | 0.9960 | 0.9830 | 0.9890 |
|             | NetMHCstabpan-1.00.9910 | 0.9910 | 1.0000 | 0.9790 | 0.9890 |
|             | NetMHCcons-1.1          | 0.9890 | 0.9780 | 0.9830 | 0.9800 |
|             | ACME                    | 0.9880 | 0.9870 | 0.9780 | 0.9830 |
|             | MixMHCpred-2.0.2        | 0.9790 | 0.9570 | 0.9310 | 0.9440 |
|             | Anthem                  | 0.9660 | 0.8790 | 0.9320 | 0.9050 |
|             | MHCNetSeq               | 0.9260 | 1.0000 | 0.4390 | 0.7200 |
| HLA-B*51:01 | HLAB                    | 0.9807 | 0.9444 | 0.9670 | 0.9558 |
|             | Anthem                  | 0.9560 | 0.8740 | 0.9290 | 0.9010 |
|             | NetMHCpan-4.1           | 0.8660 | 0.7650 | 0.7860 | 0.7760 |
|             | NetMHCcons-1.1          | 0.8590 | 0.7530 | 0.7550 | 0.7540 |
|             | NetMHCstabpan-1.00.8550 | 0.8550 | 0.7770 | 0.7270 | 0.7520 |
|             | ACME                    | 0.8520 | 0.7490 | 0.7700 | 0.7590 |
|             | MixMHCpred-2.0.2        | 0.8450 | 0.7500 | 0.7980 | 0.7740 |
|             | MHCNetSeq               | 0.7160 | 0.6130 | 0.7280 | 0.6710 |
| HLA-B*54:01 | HLAB                    | 0.9892 | 0.9333 | 0.9355 | 0.9344 |
|             | MixMHCpred-2.0.2        | 0.9820 | 0.9200 | 0.9470 | 0.9330 |
|             | Anthem                  | 0.9600 | 0.8530 | 0.9280 | 0.8910 |
|             | NetMHCstabpan-1.00.9570 | 0.9570 | 0.9100 | 0.9270 | 0.9180 |
|             | NetMHCcons-1.1          | 0.9550 | 0.8930 | 0.9270 | 0.9100 |
|             | ACME                    | 0.9550 | 0.8840 | 0.9400 | 0.9120 |
|             | NetMHCpan-4.1           | 0.9460 | 0.8970 | 0.9200 | 0.9080 |

|             |                    |        |        |        |        |        |
|-------------|--------------------|--------|--------|--------|--------|--------|
|             | MHCNetSeq          | 0.8790 | 0.9670 | 0.6100 | 0.7880 | 0.6170 |
| HLA-B*56:01 | HLAB               | 1.0000 | 0.3750 | 1.0000 | 0.6970 | 0.4859 |
|             | MixMHCpred-2.0.2   | 0.9990 | 1.0000 | 0.9880 | 0.9940 | 0.9880 |
|             | NetMHCpan-4.1      | 0.9990 | 1.0000 | 0.9940 | 0.9970 | 0.9940 |
|             | NetMHCstabpan-1.00 | 0.9990 | 1.0000 | 0.9940 | 0.9970 | 0.9940 |
|             | NetMHCcons-1.1     | 0.9970 | 1.0000 | 0.9880 | 0.9940 | 0.9880 |
|             | ACME               | 0.9930 | 0.9940 | 0.9810 | 0.9880 | 0.9750 |
|             | Anthem             | 0.9910 | 0.9000 | 0.9840 | 0.9420 | 0.8900 |
|             | MHCNetSeq          | 0.9620 | 1.0000 | 0.5500 | 0.7750 | 0.6170 |
| HLA-B*57:01 | HLAB               | 0.9683 | 0.9184 | 0.9584 | 0.9384 | 0.8775 |
|             | Anthem             | 0.9660 | 0.9200 | 0.9640 | 0.9420 | 0.8850 |
|             | MixMHCpred-2.0.2   | 0.9630 | 0.9210 | 0.9530 | 0.9370 | 0.8750 |
|             | NetMHCcons-1.1     | 0.9600 | 0.9080 | 0.9460 | 0.9270 | 0.8540 |
|             | NetMHCstabpan-1.00 | 0.9600 | 0.9060 | 0.9430 | 0.9250 | 0.8510 |
|             | ACME               | 0.9580 | 0.9110 | 0.9400 | 0.9260 | 0.8520 |
|             | NetMHCpan-4.1      | 0.9570 | 0.9070 | 0.9530 | 0.9300 | 0.8610 |
|             | MHCNetSeq          | 0.9530 | 0.9570 | 0.6840 | 0.8210 | 0.6660 |
| HLA-B*57:03 | HLAB               | 0.9860 | 0.9581 | 0.9702 | 0.9642 | 0.9284 |
|             | Anthem             | 0.9850 | 0.9440 | 0.9660 | 0.9550 | 0.9100 |
|             | NetMHCpan-4.1      | 0.9830 | 0.9470 | 0.9520 | 0.9490 | 0.8990 |
|             | NetMHCstabpan-1.00 | 0.9830 | 0.9510 | 0.9500 | 0.9500 | 0.9010 |
|             | NetMHCcons-1.1     | 0.9820 | 0.9510 | 0.9460 | 0.9490 | 0.8980 |
|             | ACME               | 0.9760 | 0.9380 | 0.9370 | 0.9380 | 0.8750 |
|             | MHCNetSeq          | 0.9490 | 0.9580 | 0.7000 | 0.8280 | 0.6810 |
| HLA-B*58:01 | HLAB               | 0.9814 | 0.9709 | 0.9712 | 0.9710 | 0.9420 |
|             | ACME               | 0.9780 | 0.9450 | 0.9610 | 0.9530 | 0.9070 |
|             | NetMHCstabpan-1.00 | 0.9750 | 0.9470 | 0.9580 | 0.9520 | 0.9050 |
|             | NetMHCcons-1.1     | 0.9740 | 0.9450 | 0.9600 | 0.9530 | 0.9060 |
|             | Anthem             | 0.9720 | 0.9360 | 0.9750 | 0.9550 | 0.9120 |
|             | NetMHCpan-4.1      | 0.9710 | 0.9380 | 0.9710 | 0.9540 | 0.9100 |
|             | MixMHCpred-2.0.2   | 0.9680 | 0.9380 | 0.9540 | 0.9460 | 0.8920 |
|             | MHCNetSeq          | 0.9650 | 0.9710 | 0.6840 | 0.8280 | 0.6840 |
| HLA-C*01:02 | HLAB               | 0.9056 | 0.7045 | 0.9556 | 0.8315 | 0.6833 |
|             | NetMHCstabpan-1.00 | 0.8930 | 0.8270 | 0.9550 | 0.8910 | 0.7890 |
|             | NetMHCpan-4.1      | 0.8820 | 0.8270 | 0.9000 | 0.8640 | 0.7310 |
|             | NetMHCcons-1.1     | 0.8790 | 0.8390 | 0.9110 | 0.8750 | 0.7530 |
|             | Anthem             | 0.8710 | 0.7640 | 0.9300 | 0.8470 | 0.7050 |
|             | MixMHCpred-2.0.2   | 0.8660 | 0.8160 | 0.7620 | 0.7890 | 0.5820 |
|             | MHCNetSeq          | 0.5690 | 0.8180 | 0.2710 | 0.5440 | 0.1080 |
| HLA-C*02:02 | HLAB               | 0.9929 | 0.8462 | 1.0000 | 0.9245 | 0.8585 |
|             | MixMHCpred-2.0.2   | 0.9900 | 0.9580 | 0.9690 | 0.9640 | 0.9270 |
|             | NetMHCpan-4.1      | 0.9820 | 0.9500 | 0.9270 | 0.9390 | 0.8790 |
|             | NetMHCcons-1.1     | 0.9770 | 0.9350 | 0.9190 | 0.9270 | 0.8570 |
|             | NetMHCstabpan-1.00 | 0.9740 | 0.9430 | 0.9040 | 0.9230 | 0.8490 |

|             |                    |        |        |        |        |        |
|-------------|--------------------|--------|--------|--------|--------|--------|
|             | Anthem             | 0.9650 | 0.8850 | 0.9510 | 0.9180 | 0.8390 |
| HLA-C*03:03 | MixMHCpred-2.0.2   | 0.9740 | 0.9200 | 0.9550 | 0.9380 | 0.8760 |
|             | HLAB               | 0.9548 | 0.9000 | 0.9048 | 0.9024 | 0.8048 |
|             | NetMHCcons-1.1     | 0.9430 | 0.8650 | 0.9700 | 0.9180 | 0.8420 |
|             | NetMHCpan-4.1      | 0.9410 | 0.8750 | 0.9650 | 0.9200 | 0.8450 |
|             | NetMHCstabpan-1.00 | 0.9400 | 0.8700 | 0.9650 | 0.9180 | 0.8410 |
|             | Anthem             | 0.9390 | 0.8000 | 0.9200 | 0.8600 | 0.7280 |
|             | MHCNetSeq          | 0.8840 | 0.8500 | 0.7350 | 0.7920 | 0.5900 |
| HLA-C*03:04 | HLAB               | 0.9923 | 0.9200 | 1.0000 | 0.9608 | 0.9243 |
|             | MixMHCpred-2.0.2   | 0.9810 | 0.9400 | 0.9560 | 0.9480 | 0.8970 |
|             | NetMHCcons-1.1     | 0.9790 | 0.9120 | 0.9600 | 0.9360 | 0.8740 |
|             | NetMHCstabpan-1.00 | 0.9780 | 0.9120 | 0.9600 | 0.9360 | 0.8740 |
|             | NetMHCpan-4.1      | 0.9710 | 0.9120 | 0.9200 | 0.9160 | 0.8340 |
|             | Anthem             | 0.9680 | 0.8160 | 0.9700 | 0.8930 | 0.7970 |
|             | MHCNetSeq          | 0.8740 | 0.8400 | 0.7320 | 0.7860 | 0.5770 |
| HLA-C*04:01 | HLAB               | 0.8353 | 0.8438 | 0.7231 | 0.7829 | 0.5707 |
|             | Anthem             | 0.8240 | 0.6780 | 0.8520 | 0.7650 | 0.5450 |
|             | NetMHCpan-4.1      | 0.7720 | 0.6590 | 0.8370 | 0.7490 | 0.5070 |
|             | MixMHCpred-2.0.2   | 0.7670 | 0.6860 | 0.8370 | 0.7620 | 0.5310 |
|             | NetMHCcons-1.1     | 0.7620 | 0.6300 | 0.8310 | 0.7310 | 0.4740 |
|             | NetMHCstabpan-1.00 | 0.7600 | 0.6750 | 0.7810 | 0.7280 | 0.4600 |
|             | MHCNetSeq          | 0.6950 | 0.9380 | 0.2310 | 0.5850 | 0.2350 |
| HLA-C*05:01 | HLAB               | 0.9768 | 0.9500 | 0.9836 | 0.9669 | 0.9344 |
|             | MixMHCpred-2.0.2   | 0.9650 | 0.9120 | 0.9530 | 0.9320 | 0.8660 |
|             | Anthem             | 0.9640 | 0.8800 | 0.9460 | 0.9130 | 0.8290 |
|             | NetMHCpan-4.1      | 0.9630 | 0.9400 | 0.9250 | 0.9320 | 0.8650 |
|             | NetMHCcons-1.1     | 0.9580 | 0.9400 | 0.9330 | 0.9370 | 0.8730 |
|             | NetMHCstabpan-1.00 | 0.9570 | 0.9250 | 0.9480 | 0.9370 | 0.8730 |
|             | MHCNetSeq          | 0.8870 | 1.0000 | 0.0780 | 0.5390 | 0.1960 |
| HLA-C*06:02 | HLAB               | 0.8837 | 0.8286 | 0.8333 | 0.8310 | 0.6619 |
|             | Anthem             | 0.8560 | 0.7890 | 0.8190 | 0.8040 | 0.6110 |
|             | NetMHCpan-4.1      | 0.8410 | 0.8150 | 0.7600 | 0.7870 | 0.5770 |
|             | NetMHCcons-1.1     | 0.8290 | 0.7740 | 0.8060 | 0.7900 | 0.5810 |
|             | NetMHCstabpan-1.00 | 0.8150 | 0.7230 | 0.8230 | 0.7730 | 0.5510 |
|             | MixMHCpred-2.0.2   | 0.8120 | 0.7400 | 0.8740 | 0.8070 | 0.6220 |
|             | MHCNetSeq          | 0.7070 | 0.9740 | 0.1000 | 0.5370 | 0.1490 |
| HLA-C*07:01 | NetMHCstabpan-1.00 | 0.9880 | 0.9880 | 0.9780 | 0.9830 | 0.9660 |
|             | NetMHCcons-1.1     | 0.9870 | 0.9830 | 0.9590 | 0.9710 | 0.9420 |
|             | NetMHCpan-4.1      | 0.9720 | 0.9540 | 0.9320 | 0.9430 | 0.8860 |
|             | Anthem             | 0.9690 | 0.8880 | 0.9380 | 0.9130 | 0.8280 |
|             | HLAB               | 0.9657 | 0.8293 | 1.0000 | 0.9157 | 0.8431 |
|             | MixMHCpred-2.0.2   | 0.9120 | 0.8830 | 0.8440 | 0.8630 | 0.7280 |
|             | MHCNetSeq          | 0.6300 | 0.5490 | 0.6800 | 0.6150 | 0.2320 |
| HLA-C*07:02 | MixMHCpred-2.0.2   | 0.9640 | 0.9400 | 0.9700 | 0.9550 | 0.9110 |

|    |             |                    |        |        |        |        |        |
|----|-------------|--------------------|--------|--------|--------|--------|--------|
|    |             | HLAB               | 0.9333 | 0.9500 | 0.7143 | 0.8293 | 0.6807 |
|    |             | NetMHCpan-4.1      | 0.9330 | 0.9350 | 0.8950 | 0.9150 | 0.8320 |
|    |             | NetMHCcons-1.1     | 0.9260 | 0.8750 | 0.8850 | 0.8800 | 0.7620 |
|    |             | NetMHCstabpan-1.00 | 0.9230 | 0.8950 | 0.8700 | 0.8820 | 0.7660 |
|    |             | Anthem             | 0.9060 | 0.8200 | 0.9560 | 0.8880 | 0.7850 |
|    |             | MHCNetSeq          | 0.8560 | 0.9100 | 0.5200 | 0.7150 | 0.4660 |
|    | HLA-C*08:02 | NetMHCpan-4.1      | 0.9940 | 0.9700 | 0.9870 | 0.9780 | 0.9570 |
|    |             | NetMHCcons-1.1     | 0.9900 | 0.9670 | 0.9530 | 0.9600 | 0.9210 |
|    |             | HLAB               | 0.9892 | 0.9333 | 0.9677 | 0.9508 | 0.9020 |
|    |             | NetMHCstabpan-1.00 | 0.9890 | 0.9460 | 0.9830 | 0.9650 | 0.9310 |
|    |             | MixMHCpred-2.0.2   | 0.9880 | 0.9430 | 0.9670 | 0.9550 | 0.9110 |
|    |             | Anthem             | 0.9800 | 0.9130 | 0.9770 | 0.9450 | 0.8930 |
|    |             | MHCNetSeq          | 0.9570 | 1.0000 | 0.4170 | 0.7080 | 0.5120 |
|    | HLA-C*16:01 | MixMHCpred-2.0.2   | 0.9840 | 0.9360 | 0.9720 | 0.9540 | 0.9080 |
|    |             | NetMHCpan-4.1      | 0.9830 | 0.9720 | 0.9430 | 0.9570 | 0.9170 |
|    |             | NetMHCcons-1.1     | 0.9620 | 0.9930 | 0.9000 | 0.9470 | 0.8980 |
|    |             | NetMHCstabpan-1.00 | 0.9620 | 1.0000 | 0.9000 | 0.9500 | 0.9050 |
|    |             | HLAB               | 0.9452 | 1.0000 | 0.8667 | 0.9310 | 0.8708 |
|    |             | Anthem             | 0.9430 | 0.7860 | 0.9520 | 0.8690 | 0.7490 |
|    |             | MHCNetSeq          | 0.8160 | 0.9500 | 0.2500 | 0.6000 | 0.2800 |
| 12 | HLA-A*01:01 | MixMHCpred-2.0.2   | 0.9910 | 0.9560 | 0.9630 | 0.9600 | 0.9190 |
|    |             | NetMHCpan-4.1      | 0.9910 | 0.9640 | 0.9650 | 0.9640 | 0.9290 |
|    |             | Anthem             | 0.9900 | 0.9430 | 0.9740 | 0.9590 | 0.9180 |
|    |             | NetMHCcons-1.1     | 0.9870 | 0.9560 | 0.9420 | 0.9490 | 0.8980 |
|    |             | NetMHCstabpan-1.00 | 0.9870 | 0.9390 | 0.9510 | 0.9450 | 0.8910 |
|    |             | ACME               | 0.9870 | 0.9560 | 0.9410 | 0.9480 | 0.8970 |
|    |             | HLAB               | 0.9768 | 0.9538 | 0.9540 | 0.9539 | 0.9078 |
|    |             | MHCNetSeq          | 0.8800 | 0.9940 | 0.1280 | 0.5610 | 0.2430 |
|    | HLA-A*02:01 | Anthem             | 0.9380 | 0.8620 | 0.8950 | 0.8780 | 0.7570 |
|    |             | HLAB               | 0.9334 | 0.9211 | 0.8646 | 0.8928 | 0.7869 |
|    |             | NetMHCcons-1.1     | 0.9310 | 0.8470 | 0.9310 | 0.8890 | 0.7810 |
|    |             | NetMHCstabpan-1.00 | 0.9310 | 0.8520 | 0.9180 | 0.8850 | 0.7710 |
|    |             | MixMHCpred-2.0.2   | 0.9260 | 0.8520 | 0.8810 | 0.8660 | 0.7330 |
|    |             | ACME               | 0.9240 | 0.8600 | 0.8860 | 0.8730 | 0.7460 |
|    |             | NetMHCpan-4.1      | 0.9190 | 0.8520 | 0.9060 | 0.8790 | 0.7590 |
|    |             | MHCNetSeq          | 0.8230 | 0.7360 | 0.7750 | 0.7550 | 0.5120 |
|    | HLA-A*03:01 | NetMHCstabpan-1.00 | 0.9820 | 0.9630 | 0.9610 | 0.9620 | 0.9240 |
|    |             | NetMHCpan-4.1      | 0.9810 | 0.9700 | 0.9510 | 0.9600 | 0.9210 |
|    |             | NetMHCcons-1.1     | 0.9810 | 0.9610 | 0.9630 | 0.9620 | 0.9240 |
|    |             | HLAB               | 0.9717 | 0.9540 | 0.9432 | 0.9486 | 0.8972 |
|    |             | ACME               | 0.9690 | 0.9560 | 0.9520 | 0.9540 | 0.9080 |
|    |             | Anthem             | 0.9630 | 0.9040 | 0.9430 | 0.9230 | 0.8470 |
|    |             | MixMHCpred-2.0.2   | 0.9610 | 0.9110 | 0.9130 | 0.9120 | 0.8250 |
|    |             | MHCNetSeq          | 0.8920 | 0.8620 | 0.7100 | 0.7860 | 0.5790 |

|             |                    |        |        |        |        |        |
|-------------|--------------------|--------|--------|--------|--------|--------|
| HLA-A*11:01 | HLAB               | 0.9844 | 0.9355 | 0.9683 | 0.9520 | 0.9044 |
|             | NetMHCpan-4.1      | 0.9680 | 0.9300 | 0.9580 | 0.9450 | 0.8890 |
|             | NetMHCstabpan-1.00 | 0.9610 | 0.9490 | 0.9730 | 0.9610 | 0.9210 |
|             | ACME               | 0.9600 | 0.9330 | 0.9600 | 0.9470 | 0.8940 |
|             | NetMHCcons-1.1     | 0.9590 | 0.9500 | 0.9740 | 0.9620 | 0.9250 |
|             | Anthem             | 0.9560 | 0.9130 | 0.9640 | 0.9380 | 0.8780 |
|             | MixMHCpred-2.0.2   | 0.9560 | 0.9350 | 0.9820 | 0.9590 | 0.9190 |
|             | MHCNetSeq          | 0.9410 | 0.9680 | 0.3520 | 0.6600 | 0.4040 |
| HLA-A*24:02 | HLAB               | 0.9759 | 0.9194 | 0.9683 | 0.9440 | 0.8890 |
|             | MixMHCpred-2.0.2   | 0.9690 | 0.9490 | 0.9600 | 0.9540 | 0.9080 |
|             | Anthem             | 0.9630 | 0.9250 | 0.9540 | 0.9400 | 0.8800 |
|             | NetMHCpan-4.1      | 0.9580 | 0.9220 | 0.9450 | 0.9340 | 0.8680 |
|             | NetMHCcons-1.1     | 0.9550 | 0.9380 | 0.9270 | 0.9330 | 0.8660 |
|             | NetMHCstabpan-1.00 | 0.9510 | 0.9450 | 0.9240 | 0.9350 | 0.8700 |
|             | ACME               | 0.9510 | 0.9010 | 0.9370 | 0.9190 | 0.8400 |
|             | MHCNetSeq          | 0.8430 | 0.9520 | 0.3630 | 0.6570 | 0.3880 |
| HLA-A*29:02 | MixMHCpred-2.0.2   | 0.9620 | 0.9090 | 0.9820 | 0.9460 | 0.8930 |
|             | Anthem             | 0.9560 | 0.9030 | 0.9370 | 0.9200 | 0.8420 |
|             | ACME               | 0.9530 | 0.9090 | 0.9550 | 0.9320 | 0.8650 |
|             | HLAB               | 0.9501 | 0.9394 | 0.9118 | 0.9254 | 0.8512 |
|             | NetMHCstabpan-1.00 | 0.9470 | 0.8850 | 0.9540 | 0.9200 | 0.8420 |
|             | NetMHCcons-1.1     | 0.9460 | 0.8790 | 0.9790 | 0.9280 | 0.8620 |
|             | NetMHCpan-4.1      | 0.9300 | 0.8790 | 0.9670 | 0.9220 | 0.8490 |
|             | MHCNetSeq          | 0.9270 | 1.0000 | 0.1550 | 0.5770 | 0.2850 |
| HLA-A*31:01 | HLAB               | 0.9692 | 0.9600 | 0.8077 | 0.8824 | 0.7749 |
|             | MixMHCpred-2.0.2   | 0.9570 | 0.8920 | 0.9680 | 0.9300 | 0.8630 |
|             | Anthem             | 0.9530 | 0.8720 | 0.9090 | 0.8900 | 0.7840 |
|             | NetMHCpan-4.1      | 0.9440 | 0.9120 | 0.9000 | 0.9060 | 0.8130 |
|             | NetMHCcons-1.1     | 0.9300 | 0.8640 | 0.9080 | 0.8860 | 0.7740 |
|             | NetMHCstabpan-1.00 | 0.9290 | 0.8720 | 0.9000 | 0.8860 | 0.7740 |
|             | ACME               | 0.9030 | 0.8200 | 0.8920 | 0.8560 | 0.7150 |
|             | MHCNetSeq          | 0.8600 | 1.0000 | 0.1400 | 0.5700 | 0.2700 |
| HLA-A*68:01 | NetMHCpan-4.1      | 1.0000 | 1.0000 | 1.0000 | 1.0000 | 1.0000 |
|             | MixMHCpred-2.0.2   | 0.9980 | 0.9940 | 0.9880 | 0.9910 | 0.9820 |
|             | ACME               | 0.9970 | 1.0000 | 0.9940 | 0.9970 | 0.9940 |
|             | NetMHCcons-1.1     | 0.9960 | 1.0000 | 0.9810 | 0.9910 | 0.9820 |
|             | NetMHCstabpan-1.00 | 0.9950 | 1.0000 | 0.9810 | 0.9910 | 0.9820 |
|             | Anthem             | 0.9890 | 0.8750 | 0.9780 | 0.9260 | 0.8610 |
|             | HLAB               | 0.9706 | 1.0000 | 0.9412 | 0.9697 | 0.9412 |
| HLA-A*68:02 | HLAB               | 0.9207 | 0.9211 | 0.7949 | 0.8571 | 0.7208 |
|             | Anthem             | 0.8770 | 0.8000 | 0.8700 | 0.8350 | 0.6730 |
|             | MixMHCpred-2.0.2   | 0.8670 | 0.7710 | 0.8950 | 0.8330 | 0.6720 |
|             | NetMHCstabpan-1.00 | 0.8530 | 0.7500 | 0.8970 | 0.8240 | 0.6560 |
|             | NetMHCcons-1.1     | 0.8500 | 0.7340 | 0.9080 | 0.8210 | 0.6520 |

|             |                    |        |        |        |        |        |
|-------------|--------------------|--------|--------|--------|--------|--------|
|             | ACME               | 0.8360 | 0.7580 | 0.8450 | 0.8010 | 0.6060 |
|             | NetMHCpan-4.1      | 0.8310 | 0.7400 | 0.8870 | 0.8130 | 0.6350 |
|             | MHCNetSeq          | 0.7300 | 1.0000 | 0.1450 | 0.5720 | 0.2730 |
| HLA-B*07:02 | NetMHCpan-4.1      | 0.9870 | 0.9620 | 0.9720 | 0.9670 | 0.9350 |
|             | ACME               | 0.9830 | 0.9460 | 0.9670 | 0.9560 | 0.9130 |
|             | Anthem             | 0.9820 | 0.9360 | 0.9570 | 0.9470 | 0.8940 |
|             | NetMHCcons-1.1     | 0.9800 | 0.9310 | 0.9630 | 0.9470 | 0.8950 |
|             | NetMHCstabpan-1.00 | 0.9800 | 0.9300 | 0.9590 | 0.9450 | 0.8900 |
|             | MixMHCpred-2.0.2   | 0.9790 | 0.9460 | 0.9510 | 0.9480 | 0.8960 |
|             | HLAB               | 0.9774 | 0.9541 | 0.9636 | 0.9589 | 0.9178 |
|             | MHCNetSeq          | 0.8490 | 1.0000 | 0.1460 | 0.5730 | 0.2790 |
| HLA-B*08:01 | NetMHCstabpan-1.00 | 0.9910 | 1.0000 | 0.9870 | 0.9930 | 0.9870 |
|             | NetMHCcons-1.1     | 0.9900 | 0.9950 | 0.9810 | 0.9880 | 0.9760 |
|             | NetMHCpan-4.1      | 0.9870 | 0.9760 | 0.9590 | 0.9670 | 0.9350 |
|             | HLAB               | 0.9708 | 0.8919 | 0.9737 | 0.9333 | 0.8693 |
|             | ACME               | 0.9680 | 0.9240 | 0.9140 | 0.9190 | 0.8390 |
|             | Anthem             | 0.9570 | 0.8000 | 0.9560 | 0.8780 | 0.7670 |
|             | MixMHCpred-2.0.2   | 0.9430 | 0.9240 | 0.8650 | 0.8950 | 0.7910 |
|             | MHCNetSeq          | 0.5600 | 0.7570 | 0.3320 | 0.5450 | 0.0970 |
| HLA-B*15:01 | HLAB               | 0.9599 | 0.8701 | 0.9103 | 0.8903 | 0.7812 |
|             | MixMHCpred-2.0.2   | 0.9400 | 0.8670 | 0.9190 | 0.8940 | 0.7890 |
|             | NetMHCstabpan-1.00 | 0.9300 | 0.8560 | 0.9140 | 0.8850 | 0.7720 |
|             | Anthem             | 0.9250 | 0.8410 | 0.9410 | 0.8910 | 0.7870 |
|             | NetMHCcons-1.1     | 0.9250 | 0.8360 | 0.9280 | 0.8830 | 0.7690 |
|             | ACME               | 0.9240 | 0.8690 | 0.9250 | 0.8970 | 0.7950 |
|             | NetMHCpan-4.1      | 0.9150 | 0.8470 | 0.9220 | 0.8850 | 0.7720 |
|             | MHCNetSeq          | 0.8780 | 1.0000 | 0.0470 | 0.5230 | 0.1500 |
| HLA-B*27:01 | HLAB               | 1.0000 | 1.0000 | 1.0000 | 1.0000 | 1.0000 |
|             | MixMHCpred-2.0.2   | 0.9980 | 0.9920 | 0.9790 | 0.9860 | 0.9710 |
|             | NetMHCpan-4.1      | 0.9980 | 1.0000 | 0.9890 | 0.9950 | 0.9900 |
|             | ACME               | 0.9960 | 1.0000 | 0.9840 | 0.9920 | 0.9850 |
|             | NetMHCcons-1.1     | 0.9900 | 0.9730 | 0.9690 | 0.9710 | 0.9420 |
|             | NetMHCstabpan-1.00 | 0.9890 | 0.9660 | 0.9740 | 0.9700 | 0.9400 |
|             | Anthem             | 0.9750 | 0.9210 | 0.9760 | 0.9490 | 0.8990 |
| HLA-B*27:02 | MixMHCpred-2.0.2   | 0.9960 | 0.9690 | 0.9750 | 0.9720 | 0.9440 |
|             | NetMHCpan-4.1      | 0.9930 | 0.9680 | 0.9780 | 0.9730 | 0.9460 |
|             | HLAB               | 0.9917 | 1.0000 | 0.9500 | 0.9748 | 0.9508 |
|             | Anthem             | 0.9840 | 0.9220 | 0.9800 | 0.9510 | 0.9030 |
|             | NetMHCstabpan-1.00 | 0.9840 | 0.9340 | 0.9730 | 0.9540 | 0.9080 |
|             | NetMHCcons-1.1     | 0.9810 | 0.9400 | 0.9510 | 0.9460 | 0.8920 |
|             | ACME               | 0.9680 | 0.9400 | 0.9440 | 0.9420 | 0.8850 |
| HLA-B*27:03 | HLAB               | 1.0000 | 1.0000 | 1.0000 | 1.0000 | 1.0000 |
|             | MixMHCpred-2.0.2   | 0.9990 | 1.0000 | 0.9870 | 0.9930 | 0.9870 |
|             | NetMHCstabpan-1.00 | 0.9990 | 1.0000 | 0.9930 | 0.9970 | 0.9940 |



|             |                    |        |        |        |        |        |
|-------------|--------------------|--------|--------|--------|--------|--------|
|             | NetMHCcons-1.1     | 0.9980 | 1.0000 | 0.9870 | 0.9930 | 0.9870 |
|             | NetMHCpan-4.1      | 0.9970 | 1.0000 | 0.9930 | 0.9970 | 0.9940 |
|             | ACME               | 0.9940 | 1.0000 | 0.9870 | 0.9930 | 0.9870 |
|             | Anthem             | 0.9660 | 0.9470 | 0.9730 | 0.9600 | 0.9260 |
|             | MHCNetSeq          | 0.9190 | 1.0000 | 0.2470 | 0.6230 | 0.3690 |
| HLA-B*27:05 | Anthem             | 0.8210 | 0.6890 | 0.7870 | 0.7380 | 0.4790 |
|             | HLAB               | 0.8016 | 0.8770 | 0.6088 | 0.7428 | 0.5042 |
|             | MixMHCpred-2.0.2   | 0.7350 | 0.6060 | 0.7400 | 0.6730 | 0.3490 |
|             | NetMHCstabpan-1.00 | 0.6840 | 0.5700 | 0.6950 | 0.6330 | 0.2680 |
|             | NetMHCcons-1.1     | 0.6820 | 0.5920 | 0.6670 | 0.6290 | 0.2590 |
|             | NetMHCpan-4.1      | 0.6450 | 0.5020 | 0.7290 | 0.6160 | 0.2390 |
|             | ACME               | 0.6420 | 0.4920 | 0.7510 | 0.6220 | 0.2520 |
|             | MHCNetSeq          | 0.6420 | 0.9710 | 0.0640 | 0.5170 | 0.0810 |
| HLA-B*27:07 | MixMHCpred-2.0.2   | 0.9970 | 0.9790 | 0.9870 | 0.9830 | 0.9670 |
|             | HLAB               | 0.9833 | 0.9583 | 0.9600 | 0.9592 | 0.9183 |
|             | NetMHCpan-4.1      | 0.9860 | 0.9620 | 0.9670 | 0.9640 | 0.9300 |
|             | NetMHCstabpan-1.00 | 0.9830 | 0.9620 | 0.9580 | 0.9600 | 0.9220 |
|             | NetMHCcons-1.1     | 0.9810 | 0.9620 | 0.9580 | 0.9600 | 0.9220 |
|             | Anthem             | 0.9680 | 0.9580 | 0.9650 | 0.9620 | 0.9240 |
|             | ACME               | 0.9680 | 0.9420 | 0.9500 | 0.9460 | 0.8930 |
| HLA-B*27:08 | MixMHCpred-2.0.2   | 0.9960 | 0.9880 | 0.9750 | 0.9810 | 0.9630 |
|             | NetMHCpan-4.1      | 0.9830 | 0.9630 | 0.9690 | 0.9650 | 0.9320 |
|             | NetMHCstabpan-1.00 | 0.9820 | 0.9380 | 0.9530 | 0.9450 | 0.8910 |
|             | Anthem             | 0.9810 | 0.8880 | 0.9850 | 0.9360 | 0.8790 |
|             | NetMHCcons-1.1     | 0.9810 | 0.9410 | 0.9660 | 0.9530 | 0.9070 |
|             | ACME               | 0.9700 | 0.9500 | 0.9250 | 0.9380 | 0.8760 |
|             | HLAB               | 0.9328 | 0.9063 | 0.9394 | 0.9231 | 0.8464 |
| HLA-B*27:09 | HLAB               | 0.9474 | 0.9016 | 0.8710 | 0.8862 | 0.7728 |
|             | MixMHCpred-2.0.2   | 0.8970 | 0.7930 | 0.9790 | 0.8860 | 0.7870 |
|             | Anthem             | 0.8950 | 0.7900 | 0.9480 | 0.8690 | 0.7480 |
|             | NetMHCstabpan-1.00 | 0.8690 | 0.7980 | 0.9480 | 0.8730 | 0.7550 |
|             | NetMHCcons-1.1     | 0.8680 | 0.8000 | 0.9530 | 0.8760 | 0.7620 |
|             | ACME               | 0.8640 | 0.7970 | 0.9420 | 0.8700 | 0.7480 |
|             | NetMHCpan-4.1      | 0.8460 | 0.7870 | 0.9690 | 0.8780 | 0.7690 |
|             | MHCNetSeq          | 0.8060 | 1.0000 | 0.0760 | 0.5380 | 0.1960 |
| HLA-B*35:01 | HLAB               | 0.9437 | 0.8333 | 0.9189 | 0.8767 | 0.7557 |
|             | Anthem             | 0.9090 | 0.8220 | 0.8750 | 0.8490 | 0.7010 |
|             | MixMHCpred-2.0.2   | 0.8660 | 0.7560 | 0.8970 | 0.8260 | 0.6600 |
|             | ACME               | 0.8240 | 0.7610 | 0.8470 | 0.8040 | 0.6130 |
|             | NetMHCstabpan-1.00 | 0.7940 | 0.7110 | 0.8580 | 0.7850 | 0.5770 |
|             | NetMHCcons-1.1     | 0.7920 | 0.7220 | 0.8810 | 0.8020 | 0.6120 |
|             | NetMHCpan-4.1      | 0.7910 | 0.6800 | 0.8890 | 0.7850 | 0.5830 |
|             | MHCNetSeq          | 0.5830 | 0.7160 | 0.4310 | 0.5730 | 0.1570 |
| HLA-B*40:01 | HLAB               | 1.0000 | 1.0000 | 1.0000 | 1.0000 | 1.0000 |

|             |                    |        |        |        |        |        |
|-------------|--------------------|--------|--------|--------|--------|--------|
|             | NetMHCcons-1.1     | 0.9980 | 0.9970 | 0.9940 | 0.9950 | 0.9900 |
|             | NetMHCstabpan-1.00 | 0.9980 | 0.9970 | 0.9940 | 0.9950 | 0.9900 |
|             | ACME               | 0.9980 | 1.0000 | 0.9970 | 0.9980 | 0.9970 |
|             | Anthem             | 0.9970 | 1.0000 | 0.9830 | 0.9910 | 0.9830 |
|             | NetMHCpan-4.1      | 0.9970 | 1.0000 | 0.9900 | 0.9950 | 0.9900 |
|             | MixMHCpred-2.0.2   | 0.9950 | 0.9710 | 0.9740 | 0.9730 | 0.9460 |
|             | MHCNetSeq          | 0.9730 | 1.0000 | 0.5650 | 0.7820 | 0.6280 |
| HLA-B*40:02 | MixMHCpred-2.0.2   | 0.9970 | 0.9730 | 0.9900 | 0.9820 | 0.9640 |
|             | HLAB               | 0.9930 | 0.9512 | 0.9762 | 0.9639 | 0.9279 |
|             | NetMHCcons-1.1     | 0.9880 | 0.9710 | 0.9710 | 0.9710 | 0.9410 |
|             | NetMHCstabpan-1.00 | 0.9860 | 0.9680 | 0.9710 | 0.9700 | 0.9390 |
|             | Anthem             | 0.9820 | 0.9320 | 0.9790 | 0.9550 | 0.9120 |
|             | NetMHCpan-4.1      | 0.9790 | 0.9630 | 0.9830 | 0.9730 | 0.9470 |
|             | ACME               | 0.9770 | 0.9710 | 0.9760 | 0.9730 | 0.9460 |
|             | MHCNetSeq          | 0.8900 | 1.0000 | 0.1830 | 0.5910 | 0.3150 |
| HLA-B*44:02 | NetMHCpan-4.1      | 0.9970 | 0.9790 | 0.9880 | 0.9830 | 0.9660 |
|             | HLAB               | 0.9925 | 0.9385 | 0.9848 | 0.9618 | 0.9246 |
|             | MixMHCpred-2.0.2   | 0.9810 | 0.9370 | 0.9460 | 0.9410 | 0.8830 |
|             | ACME               | 0.9810 | 0.9200 | 0.9630 | 0.9420 | 0.8840 |
|             | NetMHCcons-1.1     | 0.9800 | 0.8980 | 0.9800 | 0.9390 | 0.8820 |
|             | NetMHCstabpan-1.00 | 0.9780 | 0.8980 | 0.9800 | 0.9390 | 0.8820 |
|             | Anthem             | 0.9740 | 0.8950 | 0.9790 | 0.9370 | 0.8780 |
|             | MHCNetSeq          | 0.8970 | 1.0000 | 0.0710 | 0.5350 | 0.1860 |
| HLA-B*44:03 | HLAB               | 0.9979 | 0.9535 | 1.0000 | 0.9770 | 0.9550 |
|             | ACME               | 0.9890 | 0.9530 | 0.9840 | 0.9690 | 0.9380 |
|             | NetMHCcons-1.1     | 0.9870 | 0.9630 | 0.9810 | 0.9720 | 0.9450 |
|             | MixMHCpred-2.0.2   | 0.9860 | 0.9580 | 0.9930 | 0.9760 | 0.9520 |
|             | NetMHCstabpan-1.00 | 0.9860 | 0.9580 | 0.9740 | 0.9660 | 0.9330 |
|             | NetMHCpan-4.1      | 0.9820 | 0.9530 | 0.9860 | 0.9700 | 0.9400 |
|             | Anthem             | 0.9690 | 0.8970 | 0.9920 | 0.9450 | 0.8940 |
|             | MHCNetSeq          | 0.9460 | 1.0000 | 0.1510 | 0.5760 | 0.2820 |
| HLA-B*51:01 | Anthem             | 0.9160 | 0.7920 | 0.9190 | 0.8550 | 0.7170 |
|             | HLAB               | 0.8987 | 0.8732 | 0.8056 | 0.8392 | 0.6801 |
|             | NetMHCcons-1.1     | 0.8860 | 0.7740 | 0.9220 | 0.8480 | 0.7040 |
|             | NetMHCstabpan-1.00 | 0.8800 | 0.7650 | 0.9050 | 0.8350 | 0.6770 |
|             | NetMHCpan-4.1      | 0.8750 | 0.7740 | 0.8760 | 0.8250 | 0.6530 |
|             | MixMHCpred-2.0.2   | 0.8730 | 0.7970 | 0.8350 | 0.8160 | 0.6330 |
|             | ACME               | 0.8660 | 0.8060 | 0.8130 | 0.8090 | 0.6190 |
|             | MHCNetSeq          | 0.5760 | 0.7950 | 0.2680 | 0.5310 | 0.0720 |
| HLA-B*57:01 | Anthem             | 0.9490 | 0.8550 | 0.9560 | 0.9050 | 0.8150 |
|             | HLAB               | 0.9399 | 0.9066 | 0.9172 | 0.9119 | 0.8239 |
|             | MixMHCpred-2.0.2   | 0.9360 | 0.8670 | 0.9650 | 0.9160 | 0.8350 |
|             | NetMHCstabpan-1.00 | 0.9360 | 0.8520 | 0.9520 | 0.9020 | 0.8080 |
|             | NetMHCpan-4.1      | 0.9340 | 0.8850 | 0.9430 | 0.9140 | 0.8300 |

|             |                    |        |        |        |        |          |
|-------------|--------------------|--------|--------|--------|--------|----------|
|             | NetMHCcons-1.1     | 0.9340 | 0.8570 | 0.9460 | 0.9010 | 0.8060   |
|             | ACME               | 0.9310 | 0.8690 | 0.9460 | 0.9080 | 0.8180   |
|             | MHCNetSeq          | 0.8560 | 0.9930 | 0.0550 | 0.5240 | 0.1370   |
| HLA-B*57:03 | HLAB               | 0.9722 | 0.9167 | 0.9459 | 0.9315 | 0.8633   |
|             | Anthem             | 0.9330 | 0.8280 | 0.9400 | 0.8840 | 0.7750   |
|             | NetMHCpan-4.1      | 0.9250 | 0.8810 | 0.9390 | 0.9100 | 0.8210   |
|             | NetMHCcons-1.1     | 0.9170 | 0.8830 | 0.9410 | 0.9130 | 0.8270   |
|             | NetMHCstabpan-1.00 | 0.9170 | 0.8860 | 0.9300 | 0.9090 | 0.8180   |
|             | ACME               | 0.9120 | 0.8840 | 0.9110 | 0.8970 | 0.7970   |
|             | MHCNetSeq          | 0.8350 | 1.0000 | 0.0700 | 0.5350 | 0.1850   |
| HLA-B*58:01 | HLAB               | 0.9810 | 0.9143 | 0.9444 | 0.9296 | 0.8594   |
|             | NetMHCcons-1.1     | 0.9590 | 0.9170 | 0.9680 | 0.9430 | 0.8870   |
|             | NetMHCstabpan-1.00 | 0.9590 | 0.9230 | 0.9570 | 0.9400 | 0.8810   |
|             | ACME               | 0.9570 | 0.9400 | 0.9460 | 0.9430 | 0.8860   |
|             | NetMHCpan-4.1      | 0.9540 | 0.9080 | 0.9600 | 0.9340 | 0.8700   |
|             | MixMHCpred-2.0.2   | 0.9460 | 0.9080 | 0.9480 | 0.9290 | 0.8580   |
|             | Anthem             | 0.9300 | 0.8350 | 0.9300 | 0.8820 | 0.7680   |
| HLA-C*01:02 | HLAB               | 0.9437 | 0.9512 | 0.8095 | 0.8795 | 0.7675   |
|             | NetMHCcons-1.1     | 0.9350 | 0.8920 | 0.9240 | 0.9080 | 0.8180   |
|             | NetMHCpan-4.1      | 0.9320 | 0.9120 | 0.8970 | 0.9050 | 0.8100   |
|             | NetMHCstabpan-1.00 | 0.9290 | 0.9020 | 0.9780 | 0.9400 | 0.8830   |
|             | Anthem             | 0.9280 | 0.8490 | 0.9200 | 0.8850 | 0.7730   |
|             | MixMHCpred-2.0.2   | 0.7850 | 0.7930 | 0.7150 | 0.7540 | 0.5100   |
|             | MHCNetSeq          | 0.5320 | 0.7610 | 0.2390 | 0.5000 | (0.0050) |
| HLA-C*04:01 | HLAB               | 0.7600 | 0.6800 | 0.7308 | 0.7059 | 0.4114   |
|             | Anthem             | 0.7260 | 0.6080 | 0.7140 | 0.6610 | 0.3310   |
|             | NetMHCpan-4.1      | 0.6140 | 0.5000 | 0.7240 | 0.6120 | 0.2390   |
|             | NetMHCstabpan-1.00 | 0.6080 | 0.4640 | 0.7880 | 0.6260 | 0.2710   |
|             | NetMHCcons-1.1     | 0.6060 | 0.5760 | 0.6720 | 0.6240 | 0.2530   |
|             | MixMHCpred-2.0.2   | 0.5730 | 0.4920 | 0.7160 | 0.6040 | 0.2240   |
| HLA-C*05:01 | HLAB               | 0.9786 | 1.0000 | 0.9048 | 0.9512 | 0.9069   |
|             | Anthem             | 0.9420 | 0.8900 | 0.8640 | 0.8770 | 0.7570   |
|             | MixMHCpred-2.0.2   | 0.9340 | 0.8550 | 0.9400 | 0.8970 | 0.7990   |
|             | NetMHCpan-4.1      | 0.8760 | 0.8200 | 0.8750 | 0.8470 | 0.6980   |
|             | NetMHCstabpan-1.00 | 0.8550 | 0.7900 | 0.8550 | 0.8230 | 0.6480   |
|             | NetMHCcons-1.1     | 0.8500 | 0.7750 | 0.8800 | 0.8280 | 0.6620   |
| HLA-C*06:02 | HLAB               | 0.9074 | 0.9615 | 0.6667 | 0.8113 | 0.6549   |
|             | Anthem             | 0.7640 | 0.4920 | 0.9150 | 0.7040 | 0.4530   |
|             | MixMHCpred-2.0.2   | 0.6470 | 0.5880 | 0.6500 | 0.6190 | 0.2420   |
|             | NetMHCcons-1.1     | 0.5570 | 0.4430 | 0.7540 | 0.5980 | 0.2150   |
|             | NetMHCpan-4.1      | 0.5470 | 0.4650 | 0.6880 | 0.5770 | 0.1710   |
|             | NetMHCstabpan-1.00 | 0.5210 | 0.4540 | 0.6310 | 0.5420 | 0.0870   |
| HLA-C*07:01 | NetMHCstabpan-1.00 | 0.9940 | 1.0000 | 0.9780 | 0.9890 | 0.9780   |
|             | NetMHCcons-1.1     | 0.9920 | 0.9970 | 0.9690 | 0.9830 | 0.9680   |

|    |             |                    |        |        |        |        |          |
|----|-------------|--------------------|--------|--------|--------|--------|----------|
|    |             | HLAB               | 0.9850 | 0.9167 | 0.9730 | 0.9452 | 0.8917   |
|    |             | NetMHCpan-4.1      | 0.9810 | 0.9420 | 0.9390 | 0.9400 | 0.8810   |
|    |             | Anthem             | 0.9480 | 0.8110 | 0.9380 | 0.8750 | 0.7570   |
|    |             | MixMHCpred-2.0.2   | 0.8850 | 0.8500 | 0.7920 | 0.8210 | 0.6450   |
|    |             | MHCNetSeq          | 0.5020 | 0.6720 | 0.3080 | 0.4900 | (0.0240) |
| 13 | HLA-A*01:01 | MixMHCpred-2.0.2   | 0.9980 | 0.9860 | 0.9880 | 0.9870 | 0.9740   |
|    |             | Anthem             | 0.9970 | 0.9870 | 0.9720 | 0.9790 | 0.9590   |
|    |             | NetMHCcons-1.1     | 0.9950 | 0.9680 | 0.9770 | 0.9720 | 0.9450   |
|    |             | NetMHCstabpan-1.00 | 0.9950 | 0.9680 | 0.9710 | 0.9700 | 0.9390   |
|    |             | ACME               | 0.9940 | 0.9790 | 0.9760 | 0.9770 | 0.9550   |
|    |             | NetMHCpan-4.1      | 0.9930 | 0.9620 | 0.9790 | 0.9710 | 0.9410   |
|    |             | HLAB               | 0.9768 | 0.9538 | 0.9540 | 0.9539 | 0.9078   |
|    | HLA-A*02:01 | HLAB               | 0.9334 | 0.9211 | 0.8646 | 0.8928 | 0.7869   |
|    |             | Anthem             | 0.9170 | 0.8020 | 0.8940 | 0.8480 | 0.7000   |
|    |             | MixMHCpred-2.0.2   | 0.9000 | 0.7980 | 0.9390 | 0.8680 | 0.7460   |
|    |             | NetMHCpan-4.1      | 0.8940 | 0.7980 | 0.9150 | 0.8560 | 0.7180   |
|    |             | ACME               | 0.8860 | 0.7870 | 0.9110 | 0.8490 | 0.7050   |
|    |             | NetMHCstabpan-1.00 | 0.8830 | 0.7620 | 0.9050 | 0.8340 | 0.6750   |
|    |             | NetMHCcons-1.1     | 0.8810 | 0.7630 | 0.9050 | 0.8340 | 0.6760   |
|    |             | MHCNetSeq          | 0.8400 | 0.7580 | 0.7420 | 0.7500 | 0.5000   |
|    | HLA-A*03:01 | NetMHCpan-4.1      | 0.9890 | 0.9660 | 0.9610 | 0.9640 | 0.9290   |
|    |             | ACME               | 0.9800 | 0.9440 | 0.9780 | 0.9610 | 0.9230   |
|    |             | NetMHCcons-1.1     | 0.9770 | 0.9160 | 0.9660 | 0.9410 | 0.8850   |
|    |             | NetMHCstabpan-1.00 | 0.9750 | 0.9160 | 0.9720 | 0.9440 | 0.8910   |
|    |             | HLAB               | 0.9717 | 0.9540 | 0.9432 | 0.9486 | 0.8972   |
|    |             | MixMHCpred-2.0.2   | 0.9500 | 0.9380 | 0.9780 | 0.9580 | 0.9180   |
|    |             | Anthem             | 0.9400 | 0.8890 | 0.9190 | 0.9040 | 0.8120   |
|    |             | MHCNetSeq          | 0.8980 | 0.9440 | 0.7000 | 0.8220 | 0.6680   |
|    | HLA-A*11:01 | HLAB               | 0.9844 | 0.9355 | 0.9683 | 0.9520 | 0.9044   |
|    |             | NetMHCstabpan-1.00 | 0.9260 | 0.8330 | 0.9000 | 0.8670 | 0.7370   |
|    |             | MixMHCpred-2.0.2   | 0.9250 | 0.8110 | 0.9000 | 0.8550 | 0.7190   |
|    |             | NetMHCcons-1.1     | 0.9230 | 0.8500 | 0.8780 | 0.8640 | 0.7310   |
|    |             | ACME               | 0.9100 | 0.8450 | 0.8610 | 0.8530 | 0.7080   |
|    |             | NetMHCpan-4.1      | 0.8940 | 0.7950 | 0.9330 | 0.8640 | 0.7380   |
|    |             | Anthem             | 0.8880 | 0.7440 | 0.9000 | 0.8220 | 0.6550   |
|    | HLA-A*24:02 | MixMHCpred-2.0.2   | 0.9940 | 0.9670 | 0.9690 | 0.9680 | 0.9360   |
|    |             | Anthem             | 0.9800 | 0.8970 | 0.9510 | 0.9240 | 0.8510   |
|    |             | NetMHCpan-4.1      | 0.9790 | 0.9360 | 0.9510 | 0.9440 | 0.8870   |
|    |             | NetMHCstabpan-1.00 | 0.9790 | 0.9310 | 0.9310 | 0.9310 | 0.8620   |
|    |             | NetMHCcons-1.1     | 0.9780 | 0.9280 | 0.9330 | 0.9310 | 0.8620   |
|    |             | HLAB               | 0.9759 | 0.9194 | 0.9683 | 0.9440 | 0.8890   |
|    |             | ACME               | 0.9420 | 0.8720 | 0.9150 | 0.8940 | 0.7890   |
|    | HLA-A*29:02 | MixMHCpred-2.0.2   | 0.9850 | 0.9370 | 0.9710 | 0.9540 | 0.9090   |
|    |             | NetMHCcons-1.1     | 0.9650 | 0.9210 | 0.9530 | 0.9370 | 0.8760   |

|             |                         |        |        |        |        |
|-------------|-------------------------|--------|--------|--------|--------|
|             | NetMHCstabpan-1.00.9640 | 0.9310 | 0.9340 | 0.9330 | 0.8670 |
|             | NetMHCpan-4.1           | 0.9590 | 0.9260 | 0.9240 | 0.8500 |
|             | ACME                    | 0.9550 | 0.8950 | 0.9370 | 0.8330 |
|             | Anthem                  | 0.9520 | 0.8630 | 0.9800 | 0.8500 |
|             | HLAB                    | 0.9501 | 0.9394 | 0.9118 | 0.8512 |
| HLA-A*31:01 | HLAB                    | 0.9692 | 0.9600 | 0.8077 | 0.7749 |
|             | MixMHCpred-2.0.2        | 0.8940 | 0.8500 | 0.9000 | 0.8750 |
|             | Anthem                  | 0.8890 | 0.8000 | 0.8940 | 0.7010 |
|             | NetMHCstabpan-1.00.8390 | 0.7860 | 0.7930 | 0.7890 | 0.5800 |
|             | NetMHCcons-1.1          | 0.8370 | 0.7860 | 0.8210 | 0.6100 |
|             | NetMHCpan-4.1           | 0.8220 | 0.7790 | 0.8790 | 0.6630 |
|             | ACME                    | 0.7890 | 0.7710 | 0.7430 | 0.5210 |
| HLA-A*68:02 | HLAB                    | 0.9207 | 0.9211 | 0.7949 | 0.8571 |
|             | Anthem                  | 0.6920 | 0.4170 | 0.8870 | 0.6520 |
|             | MixMHCpred-2.0.2        | 0.5950 | 0.4830 | 0.7520 | 0.6170 |
|             | ACME                    | 0.5590 | 0.4740 | 0.6910 | 0.1710 |
|             | NetMHCstabpan-1.00.5500 | 0.4870 | 0.7040 | 0.5960 | 0.1980 |
|             | NetMHCcons-1.1          | 0.5320 | 0.5040 | 0.6700 | 0.1780 |
|             | NetMHCpan-4.1           | 0.5150 | 0.4170 | 0.7650 | 0.2080 |
| HLA-B*07:02 | MixMHCpred-2.0.2        | 0.9910 | 0.9590 | 0.9590 | 0.9600 |
|             | NetMHCpan-4.1           | 0.9870 | 0.9460 | 0.9560 | 0.9510 |
|             | ACME                    | 0.9850 | 0.9470 | 0.9580 | 0.9520 |
|             | NetMHCcons-1.1          | 0.9840 | 0.9580 | 0.9300 | 0.9440 |
|             | NetMHCstabpan-1.00.9840 | 0.9550 | 0.9310 | 0.9430 | 0.8860 |
|             | Anthem                  | 0.9810 | 0.8970 | 0.9690 | 0.9330 |
|             | HLAB                    | 0.9774 | 0.9541 | 0.9636 | 0.9589 |
| HLA-B*15:01 | HLAB                    | 0.9599 | 0.8701 | 0.9103 | 0.8903 |
|             | Anthem                  | 0.9410 | 0.8780 | 0.9490 | 0.8300 |
|             | MixMHCpred-2.0.2        | 0.9380 | 0.8980 | 0.9550 | 0.9270 |
|             | NetMHCpan-4.1           | 0.9220 | 0.8820 | 0.9510 | 0.9170 |
|             | NetMHCcons-1.1          | 0.9200 | 0.8590 | 0.9510 | 0.9050 |
|             | NetMHCstabpan-1.00.9180 | 0.8700 | 0.9350 | 0.9030 | 0.8080 |
|             | ACME                    | 0.9050 | 0.8630 | 0.9390 | 0.9010 |
|             | MHCNetSeq               | 0.8020 | 1.0000 | 0.0650 | 0.5320 |
| HLA-B*27:01 | HLAB                    | 1.0000 | 1.0000 | 1.0000 | 1.0000 |
|             | MixMHCpred-2.0.2        | 0.9870 | 0.9550 | 0.9940 | 0.9750 |
|             | NetMHCpan-4.1           | 0.9780 | 0.9440 | 0.9890 | 0.9660 |
|             | ACME                    | 0.9770 | 0.9660 | 0.9440 | 0.9550 |
|             | NetMHCcons-1.1          | 0.9560 | 0.9380 | 0.9610 | 0.9500 |
|             | NetMHCstabpan-1.00.9550 | 0.9380 | 0.9550 | 0.9470 | 0.8960 |
|             | Anthem                  | 0.9430 | 0.8220 | 0.9820 | 0.9020 |
| HLA-B*27:02 | MixMHCpred-2.0.2        | 1.0000 | 1.0000 | 1.0000 | 1.0000 |
|             | NetMHCpan-4.1           | 0.9950 | 0.9930 | 0.9780 | 0.9850 |
|             | NetMHCcons-1.1          | 0.9950 | 0.9740 | 0.9740 | 0.9490 |

|             |                         |        |        |        |        |
|-------------|-------------------------|--------|--------|--------|--------|
|             | NetMHCstabpan-1.00.9950 | 0.9700 | 0.9700 | 0.9700 | 0.9410 |
|             | HLAB                    | 0.9917 | 1.0000 | 0.9500 | 0.9748 |
|             | ACME                    | 0.9910 | 0.9890 | 0.9670 | 0.9780 |
|             | Anthem                  | 0.9900 | 0.9040 | 0.9650 | 0.9340 |
| HLA-B*27:05 | Anthem                  | 0.8110 | 0.6990 | 0.7670 | 0.7320 |
|             | HLAB                    | 0.8016 | 0.8770 | 0.6088 | 0.7428 |
|             | MixMHCpred-2.0.2        | 0.6950 | 0.5960 | 0.6810 | 0.6380 |
|             | NetMHCstabpan-1.00.6230 | 0.5190 | 0.6550 | 0.5870 | 0.1750 |
|             | NetMHCcons-1.1          | 0.6190 | 0.5170 | 0.6450 | 0.5810 |
|             | MHCNetSeq               | 0.6110 | 0.9600 | 0.0640 | 0.5130 |
|             | NetMHCpan-4.1           | 0.5950 | 0.4710 | 0.6710 | 0.5710 |
|             | ACME                    | 0.5830 | 0.5020 | 0.6300 | 0.5660 |
| HLA-B*27:08 | NetMHCpan-4.1           | 1.0000 | 1.0000 | 1.0000 | 1.0000 |
|             | NetMHCcons-1.1          | 1.0000 | 1.0000 | 0.9930 | 0.9970 |
|             | NetMHCstabpan-1.01.0000 | 1.0000 | 1.0000 | 0.9930 | 0.9970 |
|             | ACME                    | 0.9960 | 1.0000 | 0.9870 | 0.9930 |
|             | MixMHCpred-2.0.2        | 0.9940 | 1.0000 | 0.9930 | 0.9970 |
|             | Anthem                  | 0.9930 | 0.9070 | 0.9760 | 0.9410 |
|             | HLAB                    | 0.9328 | 0.9063 | 0.9394 | 0.9231 |
| HLA-B*27:09 | HLAB                    | 0.9474 | 0.9016 | 0.8710 | 0.8862 |
|             | Anthem                  | 0.7600 | 0.6060 | 0.8510 | 0.7280 |
|             | MixMHCpred-2.0.2        | 0.6790 | 0.5840 | 0.8500 | 0.7160 |
|             | NetMHCcons-1.1          | 0.6420 | 0.5560 | 0.8860 | 0.7210 |
|             | NetMHCstabpan-1.00.6420 | 0.5560 | 0.8920 | 0.7230 | 0.4760 |
|             | NetMHCpan-4.1           | 0.6270 | 0.5500 | 0.8670 | 0.7080 |
|             | ACME                    | 0.5930 | 0.5140 | 0.8420 | 0.6780 |
| HLA-B*35:01 | HLAB                    | 0.9437 | 0.8333 | 0.9189 | 0.8767 |
|             | MixMHCpred-2.0.2        | 0.8510 | 0.7830 | 0.7880 | 0.7850 |
|             | Anthem                  | 0.8370 | 0.6350 | 0.8930 | 0.7640 |
|             | MHCNetSeq               | 0.7570 | 0.9470 | 0.3410 | 0.6440 |
|             | NetMHCcons-1.1          | 0.7010 | 0.6770 | 0.6880 | 0.6820 |
|             | ACME                    | 0.6900 | 0.6470 | 0.6880 | 0.6670 |
|             | NetMHCstabpan-1.00.6810 | 0.6230 | 0.7060 | 0.6650 | 0.3380 |
|             | NetMHCpan-4.1           | 0.5760 | 0.5880 | 0.6060 | 0.5970 |
| HLA-B*44:02 | HLAB                    | 0.9925 | 0.9385 | 0.9848 | 0.9618 |
|             | Anthem                  | 0.9630 | 0.9430 | 0.9500 | 0.9470 |
|             | NetMHCpan-4.1           | 0.9550 | 0.9520 | 0.9860 | 0.9690 |
|             | ACME                    | 0.9540 | 0.9520 | 0.9900 | 0.9710 |
|             | MixMHCpred-2.0.2        | 0.9530 | 0.9520 | 0.9950 | 0.9740 |
|             | NetMHCcons-1.1          | 0.9530 | 0.9520 | 0.9810 | 0.9660 |
|             | NetMHCstabpan-1.00.9530 | 0.9520 | 0.9760 | 0.9640 | 0.9290 |
| HLA-B*51:01 | HLAB                    | 0.8987 | 0.8732 | 0.8056 | 0.8392 |
|             | MixMHCpred-2.0.2        | 0.8590 | 0.7750 | 0.8350 | 0.8050 |
|             | NetMHCcons-1.1          | 0.8450 | 0.8200 | 0.8150 | 0.6370 |

|             |                    |        |        |        |        |        |        |
|-------------|--------------------|--------|--------|--------|--------|--------|--------|
|             | NetMHCpan-4.1      | 0.8380 | 0.7750 | 0.8550 | 0.8150 | 0.6330 |        |
|             | NetMHCstabpan-1.00 | 0.8360 | 0.7750 | 0.8600 | 0.8180 | 0.6410 |        |
|             | Anthem             | 0.8250 | 0.6200 | 0.8610 | 0.7400 | 0.5010 |        |
|             | ACME               | 0.7700 | 0.7700 | 0.7000 | 0.7350 | 0.4760 |        |
| HLA-B*57:01 | HLAB               | 0.9399 | 0.9066 | 0.9172 | 0.9119 | 0.8239 |        |
|             | Anthem             | 0.9030 | 0.7140 | 0.9480 | 0.8310 | 0.6820 |        |
|             | MixMHCpred-2.0.2   | 0.8820 | 0.7830 | 0.8700 | 0.8260 | 0.6560 |        |
|             | NetMHCstabpan-1.00 | 0.8730 | 0.7540 | 0.8310 | 0.7930 | 0.5910 |        |
|             | NetMHCcons-1.1     | 0.8640 | 0.7090 | 0.8920 | 0.8010 | 0.6130 |        |
|             | ACME               | 0.8620 | 0.7310 | 0.8780 | 0.8040 | 0.6170 |        |
|             | NetMHCpan-4.1      | 0.8550 | 0.7330 | 0.8790 | 0.8060 | 0.6180 |        |
| HLA-B*57:03 | HLAB               | 0.9722 | 0.9167 | 0.9459 | 0.9315 | 0.8633 |        |
|             | Anthem             | 0.9560 | 0.8000 | 0.9580 | 0.8790 | 0.7700 |        |
|             | NetMHCstabpan-1.00 | 0.9300 | 0.8500 | 1.0000 | 0.9250 | 0.8600 |        |
|             | NetMHCcons-1.1     | 0.9290 | 0.8550 | 0.9900 | 0.9230 | 0.8540 |        |
|             | NetMHCpan-4.1      | 0.9100 | 0.8500 | 1.0000 | 0.9250 | 0.8600 |        |
|             | ACME               | 0.8960 | 0.8500 | 0.9850 | 0.9180 | 0.8440 |        |
| HLA-B*58:01 | HLAB               | 0.9810 | 0.9143 | 0.9444 | 0.9296 | 0.8594 |        |
|             | ACME               | 0.8410 | 0.7440 | 0.8610 | 0.8030 | 0.6140 |        |
|             | NetMHCstabpan-1.00 | 0.8370 | 0.7000 | 0.8780 | 0.7890 | 0.5910 |        |
|             | NetMHCcons-1.1     | 0.8360 | 0.7110 | 0.8550 | 0.7840 | 0.5750 |        |
|             | NetMHCpan-4.1      | 0.8280 | 0.7000 | 0.8610 | 0.7810 | 0.5760 |        |
|             | Anthem             | 0.7780 | 0.5450 | 0.9500 | 0.7470 | 0.5430 |        |
|             | MixMHCpred-2.0.2   | 0.7510 | 0.6390 | 0.8890 | 0.7640 | 0.5470 |        |
| HLA-C*04:01 | HLAB               | 0.7600 | 0.6800 | 0.7308 | 0.7059 | 0.4114 |        |
|             | Anthem             | 0.7460 | 0.5640 | 0.8420 | 0.7030 | 0.4300 |        |
|             | MixMHCpred-2.0.2   | 0.5790 | 0.6270 | 0.5860 | 0.6070 | 0.2180 |        |
|             | NetMHCstabpan-1.00 | 0.5540 | 0.4050 | 0.6090 | 0.5070 | 0.0150 |        |
|             | NetMHCpan-4.1      | 0.5450 | 0.3500 | 0.7140 | 0.5320 | 0.0780 |        |
|             | NetMHCcons-1.1     | 0.5210 | 0.4640 | 0.5860 | 0.5250 | 0.0510 |        |
| HLA-C*05:01 | HLAB               | 0.9786 | 1.0000 | 0.9048 | 0.9512 | 0.9069 |        |
|             | MixMHCpred-2.0.2   | 0.8380 | 0.7730 | 0.8870 | 0.8300 | 0.6660 |        |
|             | Anthem             | 0.7760 | 0.4930 | 0.8230 | 0.6580 | 0.3440 |        |
|             | NetMHCcons-1.1     | 0.7760 | 0.8070 | 0.7270 | 0.7670 | 0.5420 |        |
|             | NetMHCpan-4.1      | 0.7720 | 0.7200 | 0.7400 | 0.7300 | 0.4620 |        |
|             | NetMHCstabpan-1.00 | 0.7610 | 0.7800 | 0.7000 | 0.7400 | 0.4840 |        |
| HLA-C*06:02 | HLAB               | 0.9074 | 0.9615 | 0.6667 | 0.8113 | 0.6549 |        |
|             | Anthem             | 0.6180 | 0.3400 | 0.8100 | 0.5750 | 0.1750 |        |
|             | NetMHCstabpan-1.00 | 0.5900 | 0.5770 | 0.6200 | 0.5980 | 0.1980 |        |
|             | NetMHCcons-1.1     | 0.5710 | 0.5400 | 0.6730 | 0.6070 | 0.2170 |        |
|             | NetMHCpan-4.1      | 0.5650 | 0.6370 | 0.5070 | 0.5720 | 0.1450 |        |
|             | MixMHCpred-2.0.2   | 0.5210 | 0.5000 | 0.6270 | 0.5630 | 0.1340 |        |
| 14          | HLA-A*01:01        | HLAB   | 0.9988 | 0.9727 | 0.9910 | 0.9819 | 0.9640 |
|             | MixMHCpred-2.0.2   | 0.9950 | 0.9800 | 0.9840 | 0.9820 | 0.9650 |        |

|             |                    |        |        |        |        |        |
|-------------|--------------------|--------|--------|--------|--------|--------|
|             | NetMHCpan-4.1      | 0.9940 | 0.9800 | 0.9800 | 0.9800 | 0.9610 |
|             | NetMHCcons-1.1     | 0.9930 | 0.9670 | 0.9800 | 0.9740 | 0.9470 |
|             | ACME               | 0.9930 | 0.9680 | 0.9740 | 0.9720 | 0.9430 |
|             | NetMHCstabpan-1.00 | 0.9920 | 0.9690 | 0.9720 | 0.9710 | 0.9410 |
|             | Anthem             | 0.9860 | 0.9370 | 0.9740 | 0.9560 | 0.9130 |
| HLA-A*02:01 | HLAB               | 0.9567 | 0.9053 | 0.9167 | 0.9110 | 0.8220 |
|             | MixMHCpred-2.0.2   | 0.9350 | 0.8430 | 0.9180 | 0.8800 | 0.7640 |
|             | NetMHCcons-1.1     | 0.9240 | 0.8450 | 0.8920 | 0.8690 | 0.7390 |
|             | NetMHCstabpan-1.00 | 0.9230 | 0.8390 | 0.8940 | 0.8660 | 0.7350 |
|             | Anthem             | 0.9100 | 0.8000 | 0.8990 | 0.8500 | 0.7050 |
|             | NetMHCpan-4.1      | 0.9060 | 0.8120 | 0.9000 | 0.8560 | 0.7150 |
|             | ACME               | 0.8980 | 0.8160 | 0.8570 | 0.8360 | 0.6740 |
|             | MHCNetSeq          | 0.8660 | 0.8200 | 0.7670 | 0.7930 | 0.5890 |
| HLA-A*24:02 | HLAB               | 0.9872 | 0.9744 | 0.8000 | 0.8861 | 0.7850 |
|             | NetMHCcons-1.1     | 0.9860 | 0.9810 | 0.9560 | 0.9690 | 0.9390 |
|             | MixMHCpred-2.0.2   | 0.9820 | 0.9250 | 0.9810 | 0.9530 | 0.9080 |
|             | NetMHCstabpan-1.00 | 0.9820 | 0.9750 | 0.9440 | 0.9600 | 0.9190 |
|             | NetMHCpan-4.1      | 0.9800 | 0.9940 | 0.9250 | 0.9600 | 0.9220 |
|             | Anthem             | 0.9400 | 0.9000 | 0.9380 | 0.9190 | 0.8410 |
|             | ACME               | 0.9270 | 0.8810 | 0.9130 | 0.8970 | 0.7940 |
| HLA-A*68:02 | HLAB               | 0.8913 | 0.8261 | 0.6667 | 0.7447 | 0.4982 |
|             | Anthem             | 0.7780 | 0.5110 | 0.8720 | 0.6920 | 0.4180 |
|             | ACME               | 0.7100 | 0.6950 | 0.6950 | 0.6950 | 0.3940 |
|             | NetMHCstabpan-1.00 | 0.6650 | 0.6280 | 0.6280 | 0.6280 | 0.2590 |
|             | NetMHCpan-4.1      | 0.6540 | 0.6560 | 0.6170 | 0.6360 | 0.2810 |
|             | NetMHCcons-1.1     | 0.6260 | 0.6000 | 0.6500 | 0.6250 | 0.2580 |
|             | MixMHCpred-2.0.2   | 0.6200 | 0.6330 | 0.6000 | 0.6170 | 0.2370 |
| HLA-B*07:02 | HLAB               | 0.9964 | 0.8906 | 0.9846 | 0.9380 | 0.8797 |
|             | NetMHCcons-1.1     | 0.9760 | 0.9630 | 0.9430 | 0.9530 | 0.9060 |
|             | ACME               | 0.9750 | 0.9450 | 0.9480 | 0.9470 | 0.8950 |
|             | NetMHCpan-4.1      | 0.9730 | 0.9710 | 0.9710 | 0.9710 | 0.9430 |
|             | NetMHCstabpan-1.00 | 0.9730 | 0.9630 | 0.9370 | 0.9500 | 0.9010 |
|             | MixMHCpred-2.0.2   | 0.9680 | 0.9280 | 0.9510 | 0.9400 | 0.8810 |
|             | Anthem             | 0.9430 | 0.8520 | 0.9540 | 0.9030 | 0.8110 |
| HLA-B*15:01 | MixMHCpred-2.0.2   | 0.9500 | 0.9190 | 0.9220 | 0.9200 | 0.8410 |
|             | NetMHCcons-1.1     | 0.9370 | 0.8780 | 0.9280 | 0.9030 | 0.8080 |
|             | NetMHCstabpan-1.00 | 0.9370 | 0.8720 | 0.9100 | 0.8910 | 0.7820 |
|             | Anthem             | 0.9360 | 0.8500 | 0.9430 | 0.8970 | 0.7980 |
|             | ACME               | 0.9340 | 0.8880 | 0.8780 | 0.8830 | 0.7680 |
|             | NetMHCpan-4.1      | 0.9330 | 0.8940 | 0.9220 | 0.9080 | 0.8160 |
|             | HLAB               | 0.9123 | 0.8824 | 0.8654 | 0.8738 | 0.7477 |
|             | MHCNetSeq          | 0.8550 | 0.9690 | 0.3840 | 0.6770 | 0.4320 |
| HLA-B*27:05 | Anthem             | 0.8240 | 0.7530 | 0.7560 | 0.7540 | 0.5090 |
|             | HLAB               | 0.8225 | 0.7431 | 0.7416 | 0.7423 | 0.4847 |



|             |                    |        |        |        |        |          |
|-------------|--------------------|--------|--------|--------|--------|----------|
|             | MixMHCpred-2.0.2   | 0.6600 | 0.5710 | 0.6840 | 0.6270 | 0.2570   |
|             | NetMHCstabpan-1.00 | 0.5330 | 0.4860 | 0.5870 | 0.5360 | 0.0730   |
|             | NetMHCcons-1.1     | 0.5290 | 0.4780 | 0.5950 | 0.5360 | 0.0730   |
|             | MHCNetSeq          | 0.5230 | 0.9530 | 0.0530 | 0.5030 | 0.0130   |
|             | NetMHCpan-4.1      | 0.5200 | 0.4560 | 0.5320 | 0.4940 | (0.0120) |
|             | ACME               | 0.5180 | 0.4330 | 0.5690 | 0.5010 | 0.0020   |
| HLA-B*27:09 | HLAB               | 0.9182 | 0.8333 | 0.7838 | 0.8082 | 0.6176   |
|             | Anthem             | 0.8380 | 0.6720 | 0.9010 | 0.7860 | 0.5910   |
|             | MixMHCpred-2.0.2   | 0.7600 | 0.6800 | 0.8080 | 0.7440 | 0.4970   |
|             | NetMHCcons-1.1     | 0.6140 | 0.6040 | 0.6320 | 0.6180 | 0.2400   |
|             | NetMHCstabpan-1.00 | 0.6130 | 0.6160 | 0.6240 | 0.6200 | 0.2450   |
|             | NetMHCpan-4.1      | 0.5500 | 0.4600 | 0.7320 | 0.5960 | 0.2030   |
|             | ACME               | 0.5490 | 0.5560 | 0.5880 | 0.5720 | 0.1450   |
| HLA-B*35:01 | HLAB               | 0.9346 | 0.9412 | 0.7778 | 0.8571 | 0.7261   |
|             | Anthem             | 0.8310 | 0.5330 | 0.8870 | 0.7100 | 0.4570   |
|             | MHCNetSeq          | 0.7460 | 0.9660 | 0.3000 | 0.6330 | 0.3600   |
|             | MixMHCpred-2.0.2   | 0.5860 | 0.7730 | 0.5330 | 0.6530 | 0.3190   |
|             | NetMHCstabpan-1.00 | 0.5260 | 0.6530 | 0.5330 | 0.5930 | 0.1950   |
|             | ACME               | 0.5240 | 0.4400 | 0.7800 | 0.6100 | 0.2380   |
|             | NetMHCpan-4.1      | 0.5210 | 0.6200 | 0.5000 | 0.5600 | 0.1230   |
|             | NetMHCcons-1.1     | 0.5020 | 0.7600 | 0.4470 | 0.6030 | 0.2250   |
| HLA-B*57:01 | HLAB               | 0.9810 | 0.9000 | 0.9524 | 0.9268 | 0.8544   |
|             | Anthem             | 0.8200 | 0.6050 | 0.8660 | 0.7360 | 0.4890   |
|             | MixMHCpred-2.0.2   | 0.7490 | 0.6310 | 0.8190 | 0.7250 | 0.4600   |
|             | NetMHCpan-4.1      | 0.7340 | 0.6430 | 0.7220 | 0.6830 | 0.3670   |
|             | NetMHCcons-1.1     | 0.7060 | 0.5670 | 0.7710 | 0.6690 | 0.3470   |
|             | NetMHCstabpan-1.00 | 0.7030 | 0.6010 | 0.7200 | 0.6610 | 0.3250   |
|             | ACME               | 0.7030 | 0.5280 | 0.8480 | 0.6880 | 0.3980   |
| HLA-C*04:01 | HLAB               | 0.8123 | 0.5909 | 0.8696 | 0.7333 | 0.4809   |
|             | Anthem             | 0.7800 | 0.4210 | 0.8910 | 0.6560 | 0.3590   |
|             | NetMHCpan-4.1      | 0.6040 | 0.4530 | 0.6000 | 0.5260 | 0.0780   |
|             | NetMHCcons-1.1     | 0.6020 | 0.5580 | 0.4260 | 0.4920 | (0.0160) |
|             | NetMHCstabpan-1.00 | 0.5870 | 0.4950 | 0.4950 | 0.4950 | (0.0110) |
|             | MixMHCpred-2.0.2   | 0.5610 | 0.5740 | 0.6580 | 0.6160 | 0.2350   |
| HLA-C*05:01 | HLAB               | 0.9583 | 0.8667 | 0.8750 | 0.8710 | 0.7417   |
|             | Anthem             | 0.6220 | 0.3880 | 0.8900 | 0.6390 | 0.3340   |
|             | NetMHCpan-4.1      | 0.5470 | 0.4810 | 0.7380 | 0.6090 | 0.2380   |
|             | MixMHCpred-2.0.2   | 0.5300 | 0.7060 | 0.4880 | 0.5970 | 0.2090   |
|             | NetMHCstabpan-1.00 | 0.5250 | 0.4320 | 0.7690 | 0.6000 | 0.2190   |
|             | NetMHCcons-1.1     | 0.5030 | 0.4440 | 0.7250 | 0.5850 | 0.1880   |
| HLA-C*06:02 | HLAB               | 0.8129 | 0.1333 | 1.0000 | 0.5738 | 0.2693   |
|             | Anthem             | 0.7340 | 0.5170 | 0.8020 | 0.6590 | 0.3360   |
|             | NetMHCpan-4.1      | 0.5210 | 0.5420 | 0.5690 | 0.5560 | 0.1150   |
|             | NetMHCcons-1.1     | 0.5210 | 0.5000 | 0.5420 | 0.5210 | 0.0430   |

|                         |        |        |        |        |        |
|-------------------------|--------|--------|--------|--------|--------|
| MixMHCpred-2.0.2        | 0.5100 | 0.4560 | 0.6280 | 0.5420 | 0.0870 |
| MHCNetSeq               | 0.5070 | 0.9440 | 0.0810 | 0.5120 | 0.0380 |
| NetMHCstabpan-1.00.5050 |        | 0.5530 | 0.5300 | 0.5420 | 0.0840 |

## References

1. Mei S, Li F, Xiang D et al. Anthem: a user customised tool for fast and accurate prediction of binding between peptides and HLA class I molecules, *Brief Bioinform* 2021;22.
2. Kumar DS, Swapnil M, Sinu P et al. IEDB-AR: immune epitope database-analysis resource in 2019, *Nuclc Acids Research* 2019;W1.
3. Reche P, Zhang H, Glutting J et al. EPIMHC: a curated database of MHC-binding peptides for customized computational vaccinology, *Bioinformatics* 2005;21:2140-2141.
4. Lata S, Bhasin M, Raghava GP. MHCBN 4.0: A database of MHC/TAP binding peptides and T-cell epitopes, *Bmc Research Notes* 2009;2.
5. Schuler MM, Nastke M, Stevanović S. SYFPEITHI: database for searching and T-cell epitope prediction, *Methods Mol Biol* 2007;409:75-93.
6. Nielsen M, Lundegaard C, Blicher T et al. NetMHCpan, a Method for Quantitative Predictions of Peptide Binding to Any HLA-A and -B Locus Protein of Known Sequence, *PLOS ONE* 2007;2:e796.
